# Supplementary material
Source: PubMed Central journal article supplement (PMC4350033)

**Supplemental Figure 1. Skyline results of screening recombinant monoclonal antibodies by immuno-MRM-MS.** Screen captures illustrate heavy peptide responses for three different transitions at two spike levels: one at a low level and one at the next-higher level (at which the response was unambiguous). Screen captures of the light peptide (at the unambiguous level) are shown as well, to illustrate the overlap of the light and heavy peptides' retention times. The data of two replicate immuno-MRM capture experiments (for one heavy peptide spike level) are shown side-by-side. Intensities are given in counts per second (cps), and retention times are in minutes (min). An assay's grade was determined based on the detection of at least two transitions at a certain heavy peptide spike level. More specifically, both the most intense and second-most intense transitions of a heavy peptide had to be observed (after Savitzky-Golay smoothing) at 1000 and 500 cps intensity in two replicate immuno-MRM experiments to be deemed "robustly detected" at a certain grade level (in the case of an A-B grade assay, the thresholds were 500 and 250 cps for the most and second-most intense transitions, respectively). Dashed vertical lines show integration boundaries that were automatically added by Skyline to obtain peak areas (however, peak areas were not considered for assigning assay grades; only peak intensities were used for grade assignments).

**Table of contents (giving the target peptide ID, the gene symbol, and the target peptide sequence):**

|                                          |    |
|------------------------------------------|----|
| SAIC-01B, CD44, TFIPVTSAK.....           | 3  |
| SAIC-02A, ERBB2, GLQSLPTHDPSPQLR.....    | 4  |
| SAIC-07B, XPNPEP1, GSLTFEPLTLVPIQTK..... | 5  |
| SAIC-07E, XPNPEP1, TSLDEVYLIDSGAQYK..... | 6  |
| SAIC-13B, ANXA1, AAYLQETGKPLDETLK.....   | 7  |
| SAIC-13C, ANXA1, GVDEATIIDILTK.....      | 8  |
| SAIC-14C, ANXA4, DEGNYLDDALVR.....       | 9  |
| SAIC-16D, CALR, GLQTSQDAR.....           | 10 |
| SAIC-19D, GRB2, FGNDVQHFK.....           | 11 |
| SAIC-21C, FEN1, SIEEIVR.....             | 12 |
| SAIC-22D, GSTP1, YISLIYTNYEAGK.....      | 13 |
| SAIC-23B, HSPB1, DGVVEITGK.....          | 14 |
| SAIC-23C, HSPB1, VSLDVNHFAPDELTVK.....   | 15 |
| SAIC-23E, HSPB1, LFDQAFGLPR.....         | 16 |
| SAIC-24B, IL18, ISTLSCENK.....           | 17 |
| SAIC-25B, LGALS1, SFVLNLGK.....          | 18 |
| SAIC-26C, NFKB2, IEVDLVTHSDPPR.....      | 19 |
| SAIC-27C, PCNA, LVQGSILK.....            | 20 |

|                                         |    |
|-----------------------------------------|----|
| SAIC-28A, RAD23B, ILNDDTALK.....        | 21 |
| SAIC-28B, RAD23B, IDIDPEETVK.....       | 22 |
| SAIC-30C, RRM2, IEQEFLTEALPVK.....      | 23 |
| SAIC-30E, RRM2, DIQHWESLKPEER.....      | 24 |
| SAIC-31A, SNCG, TVEEAENIAVTSGVVR.....   | 25 |
| SAIC-32C, FSCN1, YLAPSGPSGTLK.....      | 26 |
| SAIC-33B, TAGLN, AAEDYGVK.....          | 27 |
| SAIC-34A, PRDX2, ATAVVDGAFK.....        | 28 |
| SAIC-34B, PRDX2, LSEDYGVK.....          | 29 |
| SAIC-34D, PRDX2, GLFIIDGK.....          | 30 |
| SAIC-36A, UBE2I, DHPFGFVAVPTK.....      | 31 |
| SAIC-36C, UBE2I, GTPWEGGLFK.....        | 32 |
| SAIC-37C, EZR, SGYLSSER.....            | 33 |
| SAIC-40A, PRDX4, QITLNDLPVGR.....       | 34 |
| SAIC-40C, PRDX4, LVQAFQYTDK.....        | 35 |
| SAIC-41A, UBE2C, GISAFPESDNLFK.....     | 36 |
| SAIC-41C, UBE2C, LSLEFPSGYPNAPTvk.....  | 37 |
| SAIC-42B, SERPINA6, AQLLQGLGFNLTER..... | 38 |
| SAIC-43B, CLU, ASSIIDELFQDR.....        | 39 |

SAIC-01B, CD44, TFIPVTSAK.

H peptide transitions at 0.5 fmol/uL spike level; capture experiment 1 (left), capture experiment 2 (right).

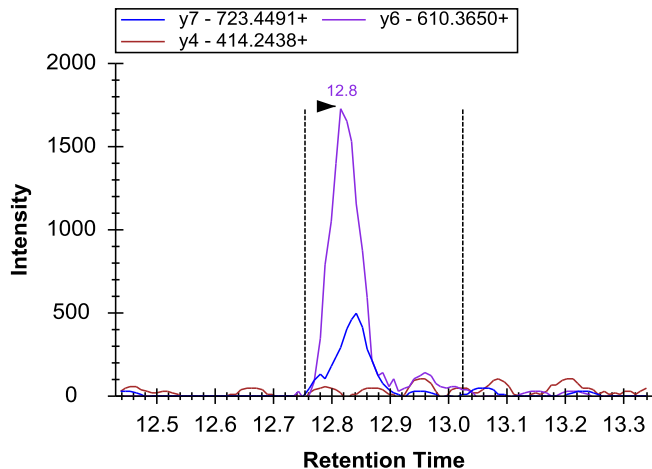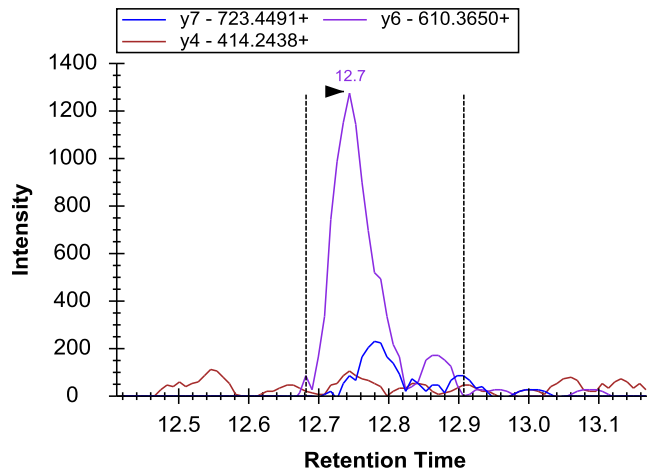

H peptide transitions at 5 fmol/uL spike level; capture experiment 1 (left), capture experiment 2 (right). The assay's grade (grade C) was given based on this spike level.

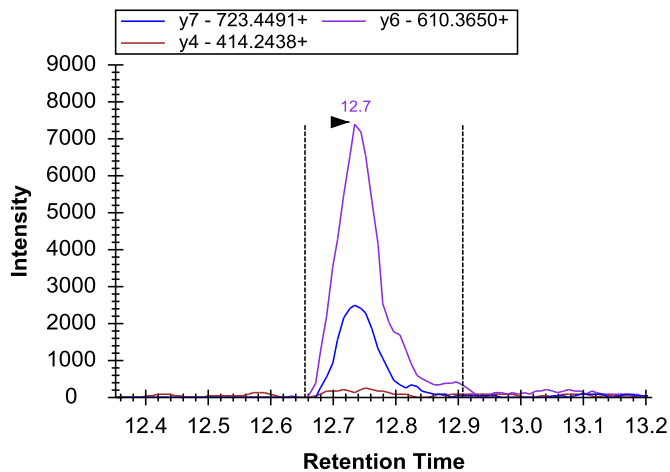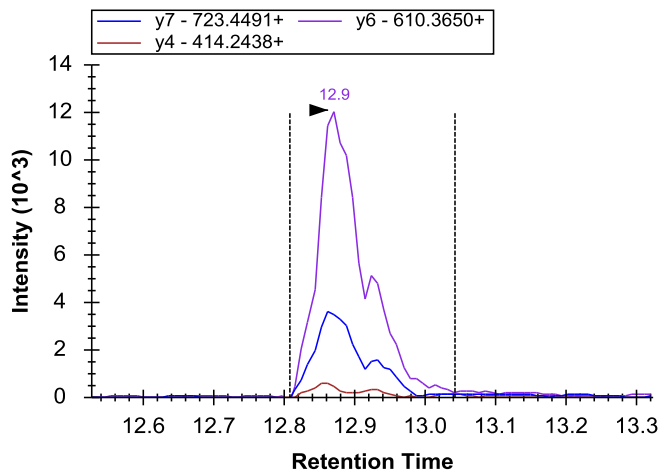

L peptide transitions, spiked at 10 fmol/uL; capture experiment 1 (left), capture experiment 2 (right).

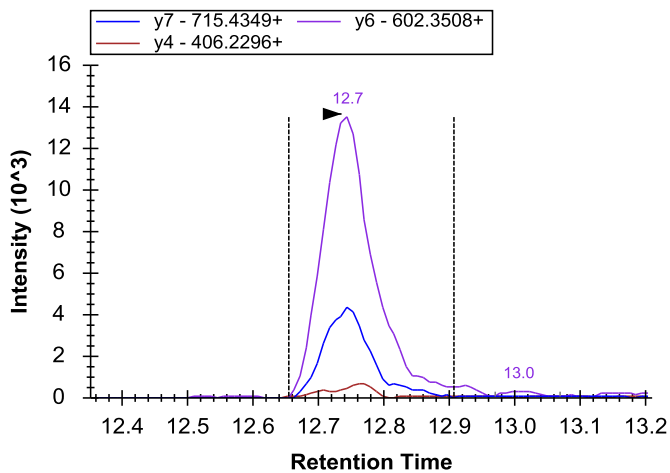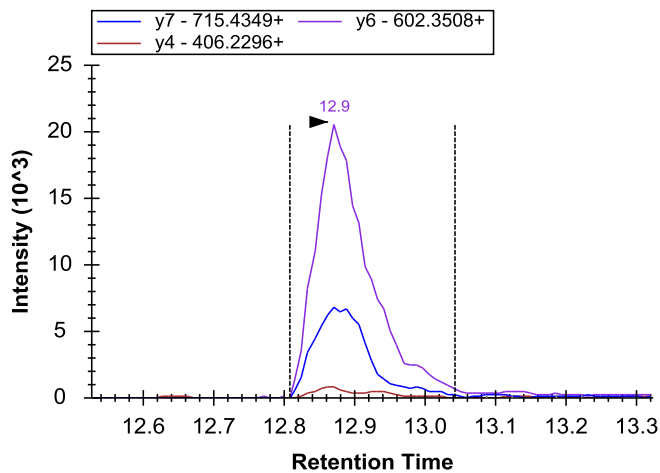

SAIC-02A, ERBB2, GLQSLPTHDPSPQLQR.

H peptide transitions at 0.05 fmol/uL spike level; capture experiment 1 (left), capture experiment 2 (right). The assay's grade (grade A) was given based on this spike level.

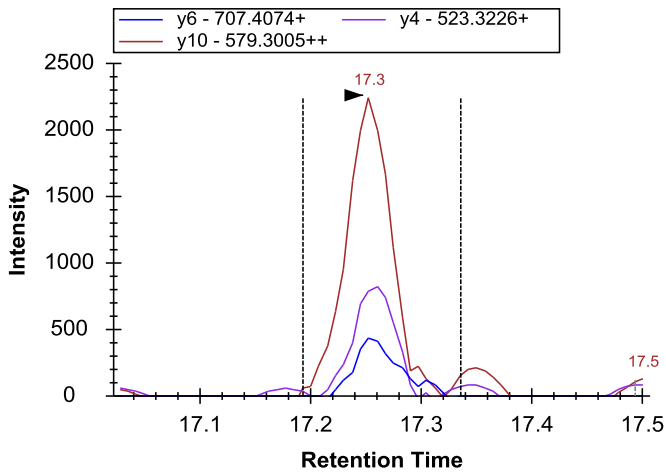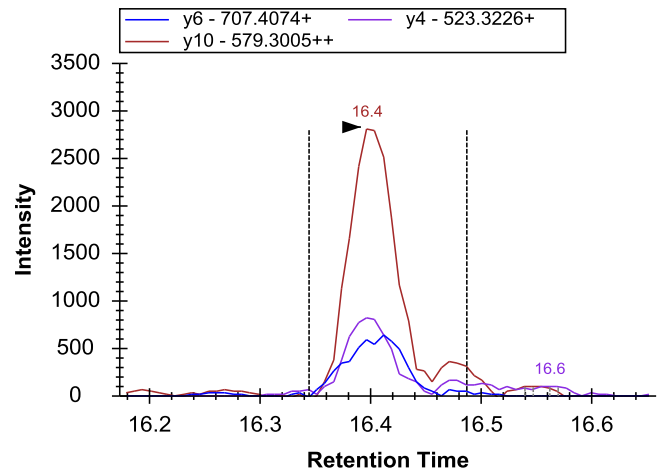

H peptide transitions at 0.5 fmol/uL spike level; capture experiment 1 (left), capture experiment 2 (right).

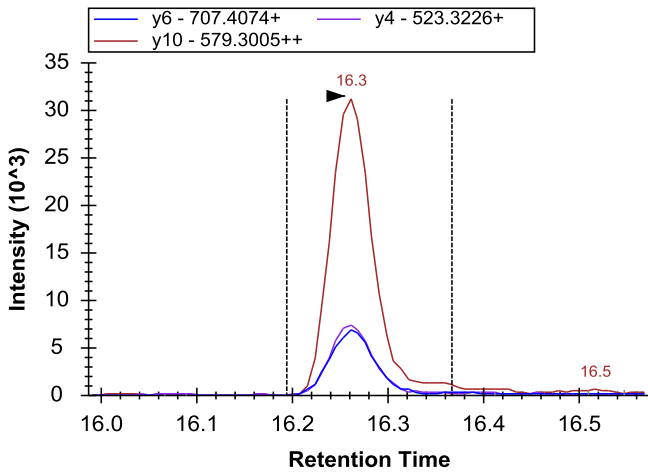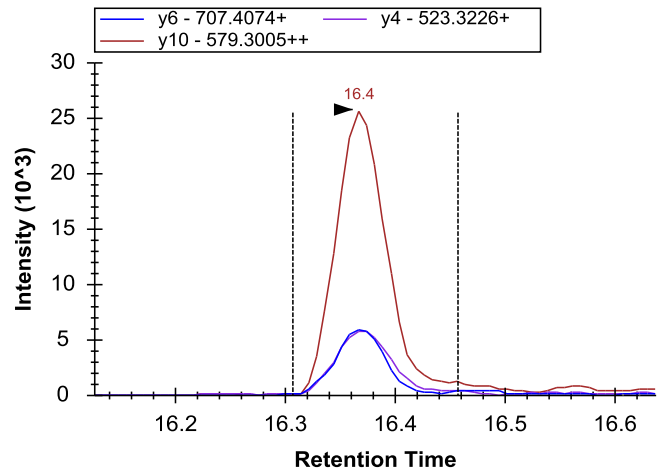

L peptide transitions, spiked at 10 fmol/uL; capture experiment 1 (left), capture experiment 2 (right).

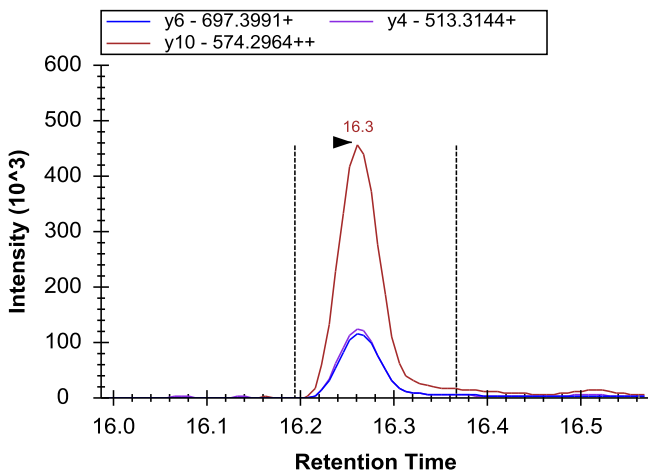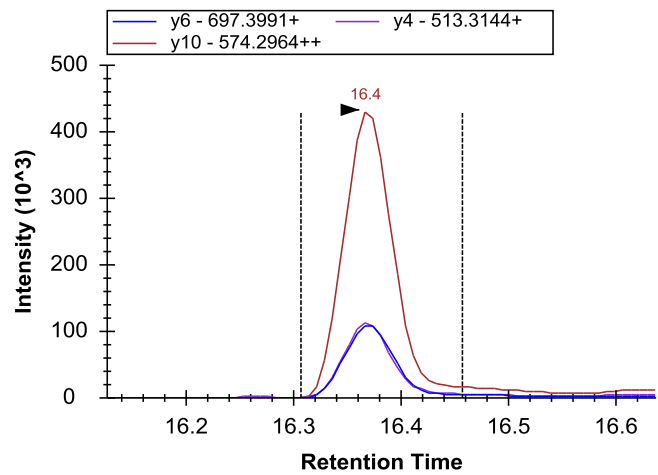

SAIC-07B, XPNPEP1, GSLTFEPLTLVPIQTK.

H peptide transitions at 0.05 fmol/uL spike level; capture experiment 1 (left), capture experiment 2 (right).

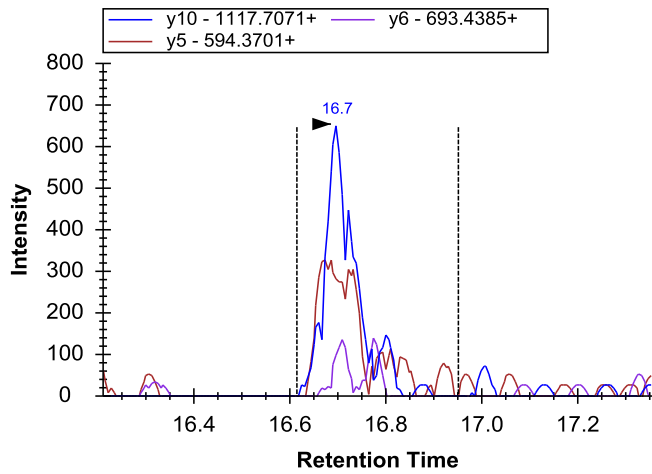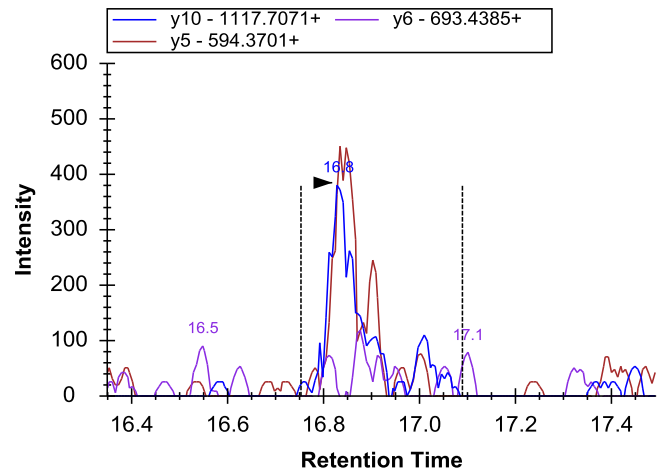

H peptide transitions at 0.5 fmol/uL spike level; capture experiment 1 (left), capture experiment 2 (right). The assay's grade (grade B) was given based on this spike level.

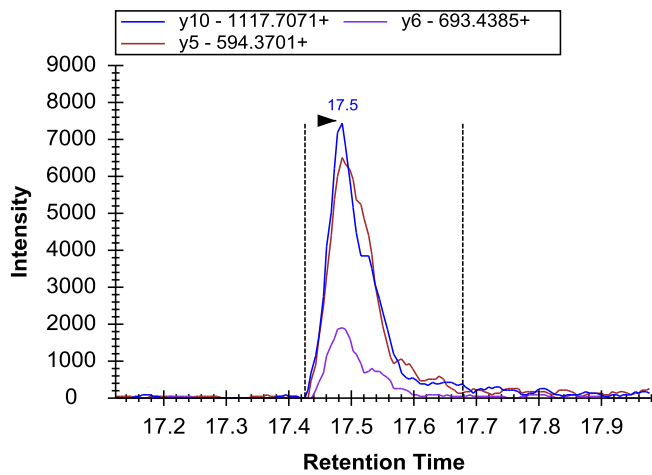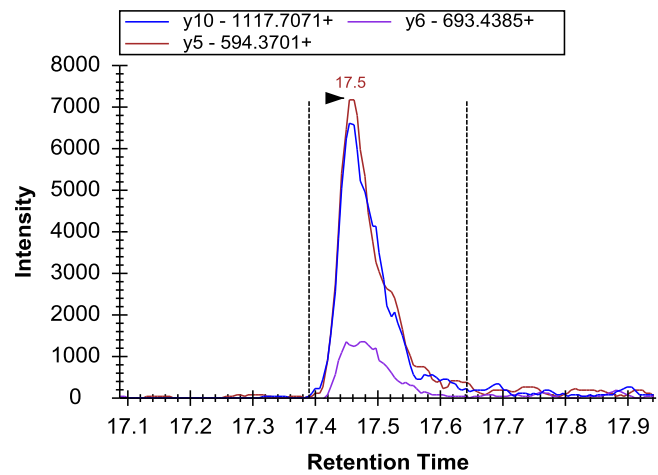

L peptide transitions, spiked at 10 fmol/uL; capture experiment 1 (left), capture experiment 2 (right).

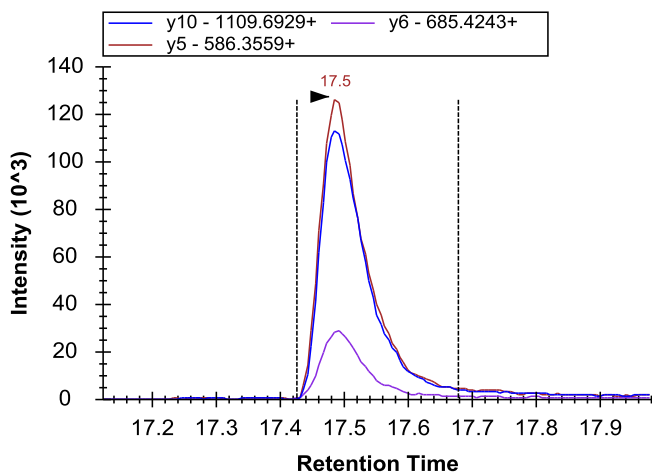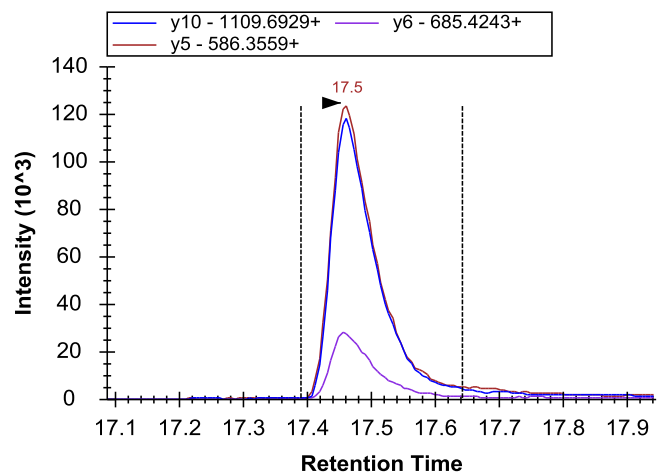

SAIC-07E, XPNPEP1, TSLSLDEVYLIDSGAQYK.

H peptide transitions at 0.5 fmol/uL spike level; capture experiment 1 (left), capture experiment 2 (right). The assay's grade (grade B) was given based on this spike level.

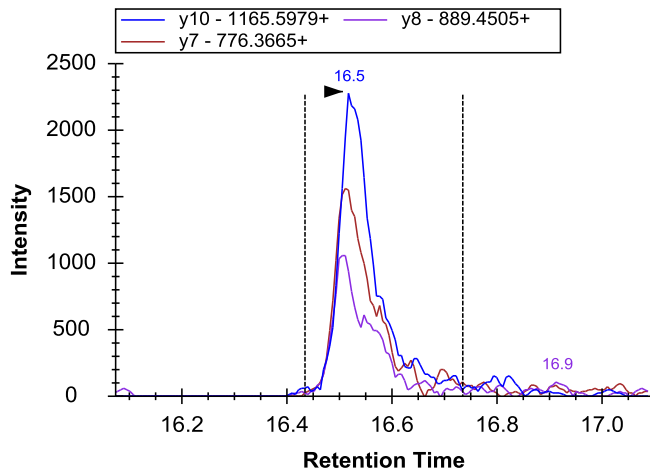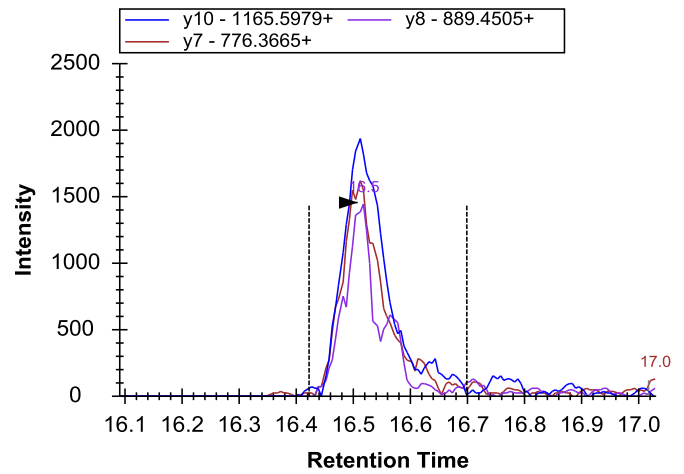

H peptide transitions at 5 fmol/uL spike level; capture experiment 1 (left), capture experiment 2 (right).

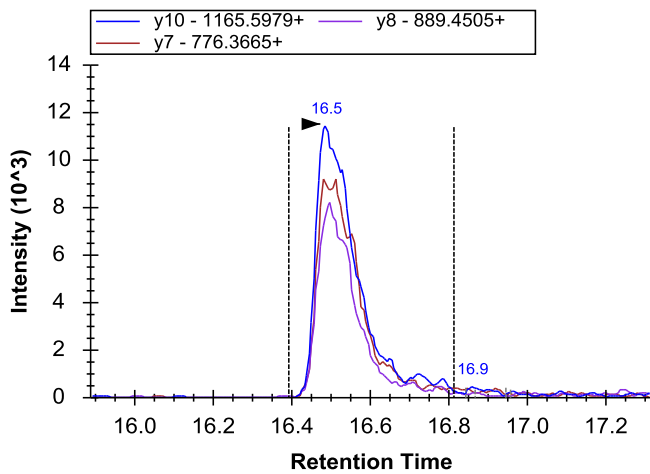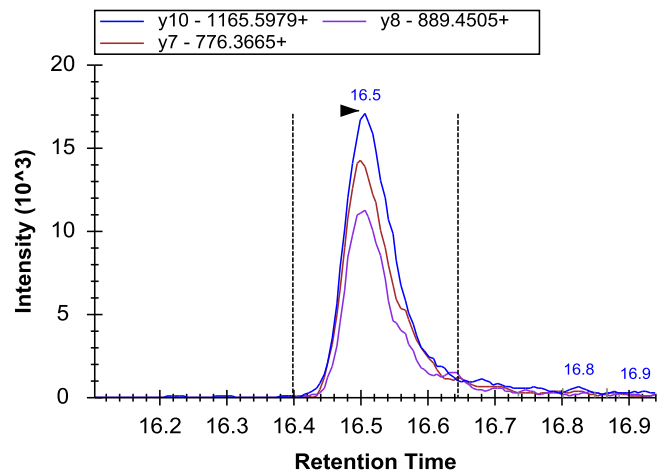

L peptide transitions, spiked at 10 fmol/uL; capture experiment 1 (left), capture experiment 2 (right).

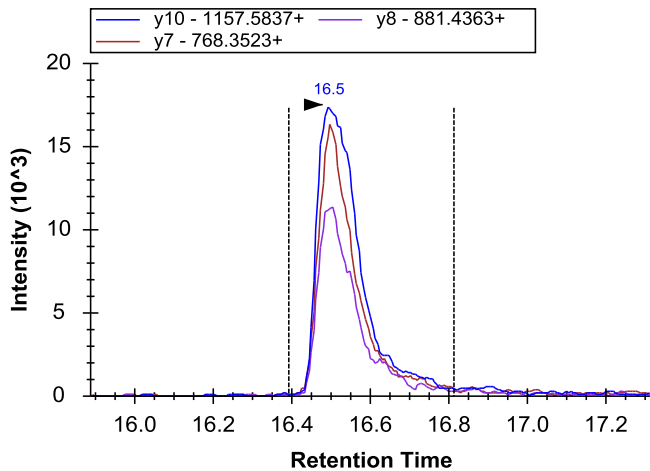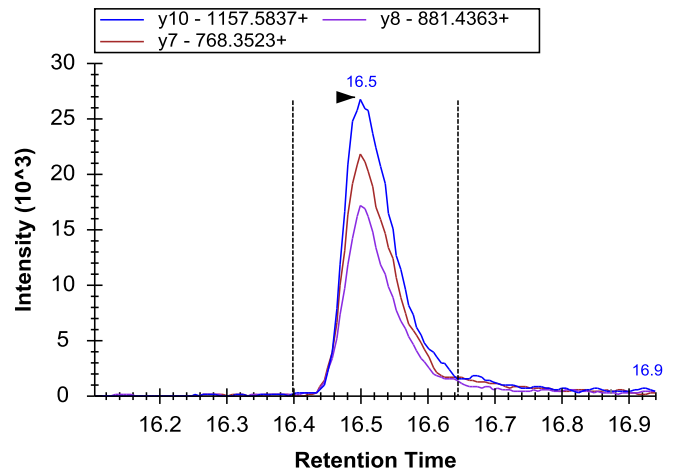

SAIC-13B, ANXA1, AAYLQETGKPLDETLK.

H peptide transitions at 0.05 fmol/uL spike level; capture experiment 1 (left), capture experiment 2 (right). The assay's grade (grade A-B) was given based on this and the next (0.5 fmol/uL) spike level.

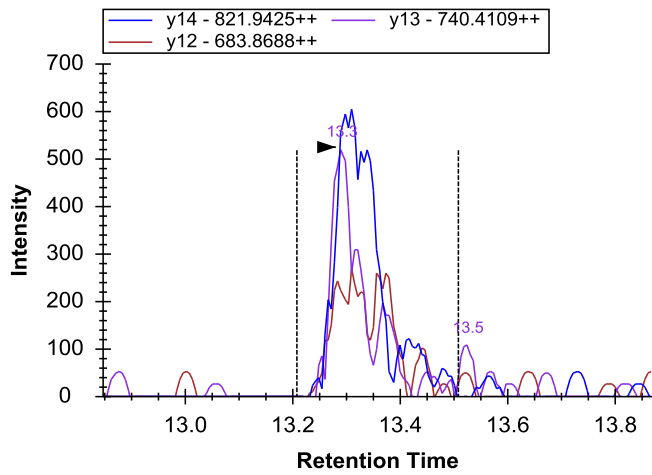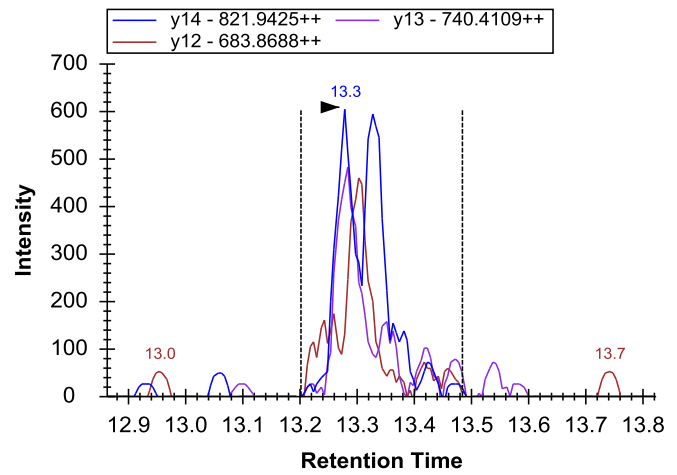

H peptide transitions at 0.5 fmol/uL spike level; capture experiment 1 (left), capture experiment 2 (right).

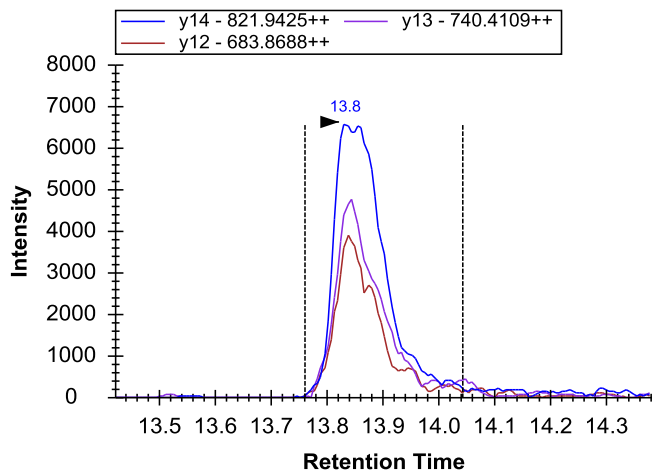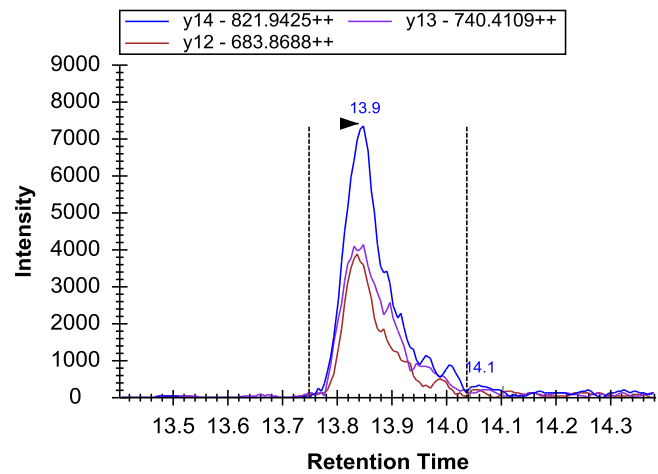

L peptide transitions, spiked at 10 fmol/uL; capture experiment 1 (left), capture experiment 2 (right).

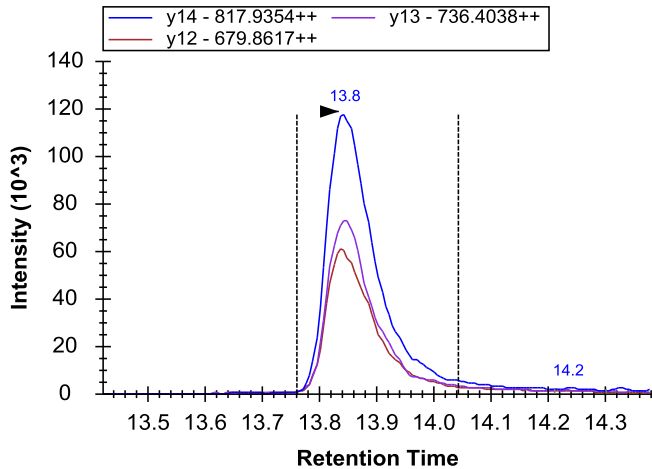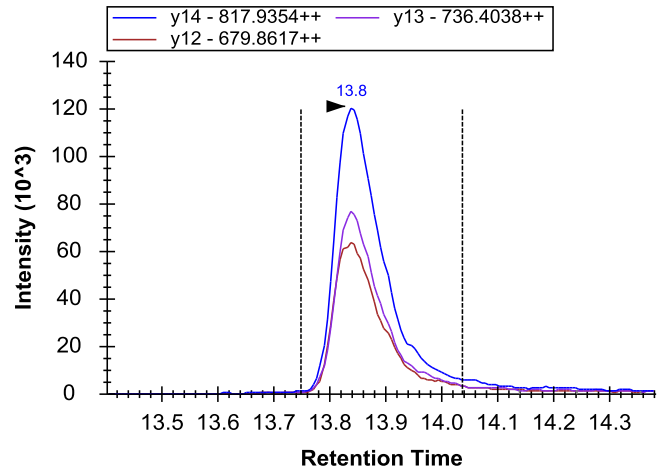

SAIC-13C, ANXA1, GVDEATIIDLTK.

H peptide transitions at 0.5 fmol/uL spike level; capture experiment 1 (left), capture experiment 2 (right). The assay's grade (grade B) was given based on this spike level.

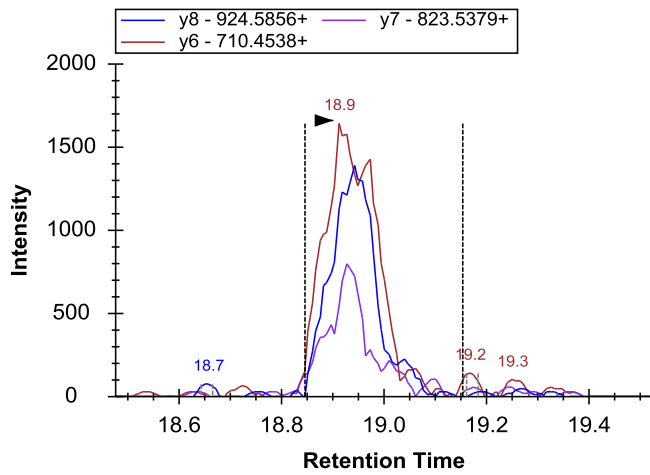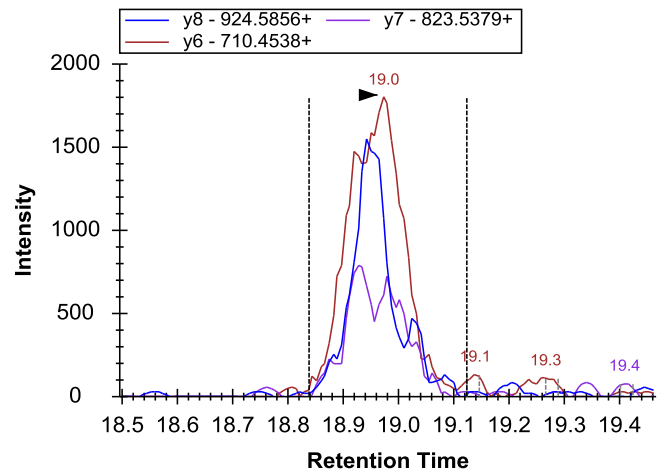

H peptide transitions at 5 fmol/uL spike level; capture experiment 1 (left), capture experiment 2 (right).

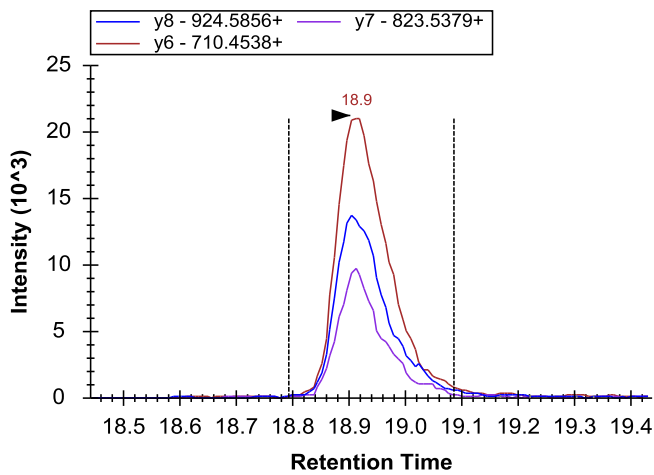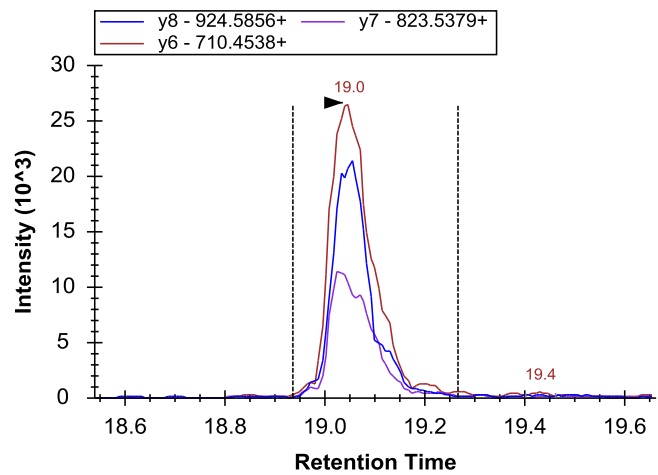

L peptide transitions, spiked at 10 fmol/uL; capture experiment 1 (left), capture experiment 2 (right).

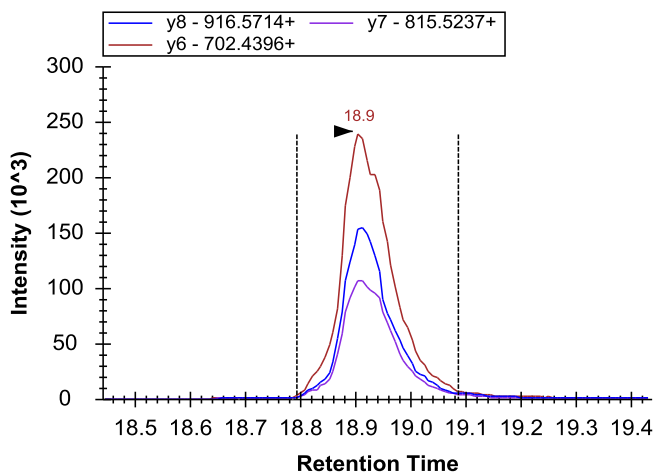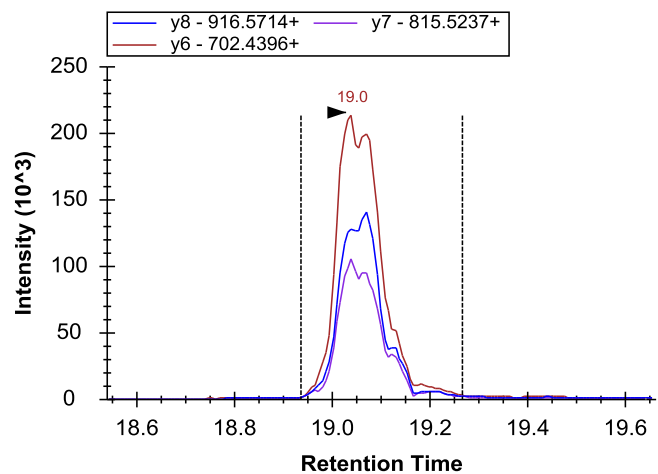



SAIC-14C, ANXA4, DEGNYLDDALVR.

H peptide transitions at 0.5 fmol/uL spike level; capture experiment 1 (left), capture experiment 2 (right). The assay's grade (grade B) was given based on this spike level.

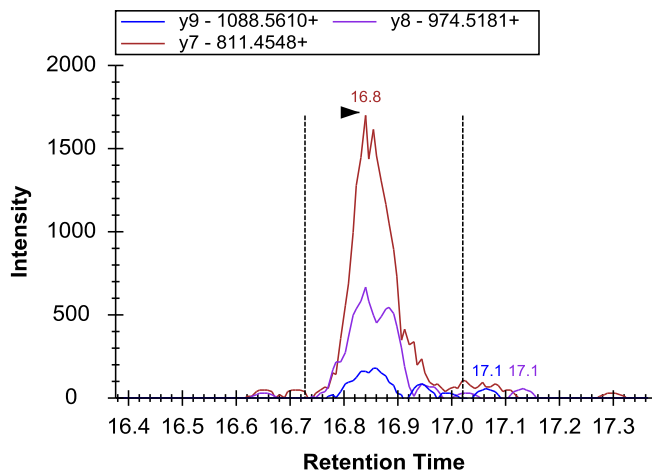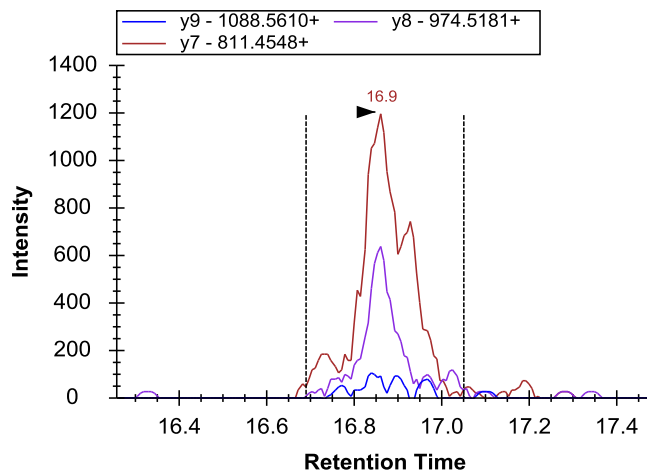

H peptide transitions at 5 fmol/uL spike level; capture experiment 1 (left), capture experiment 2 (right).

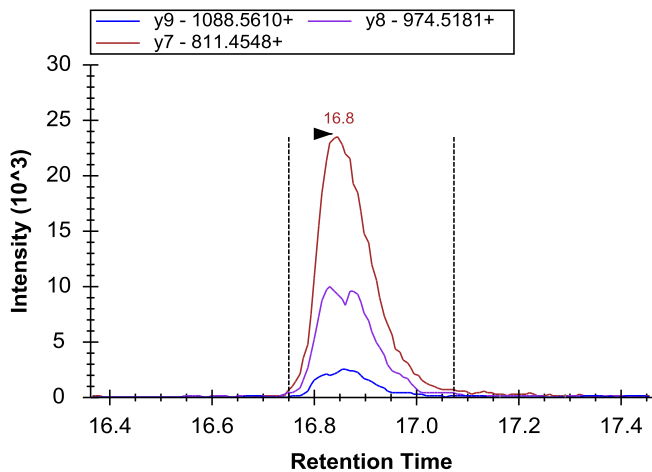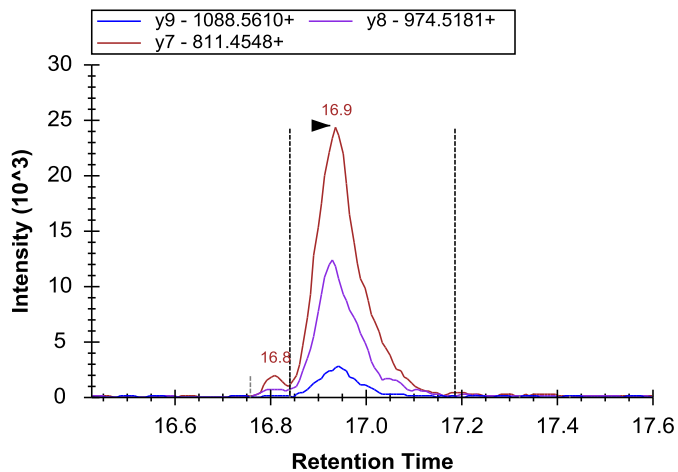

L peptide transitions, spiked at 10 fmol/uL; capture experiment 1 (left), capture experiment 2 (right).

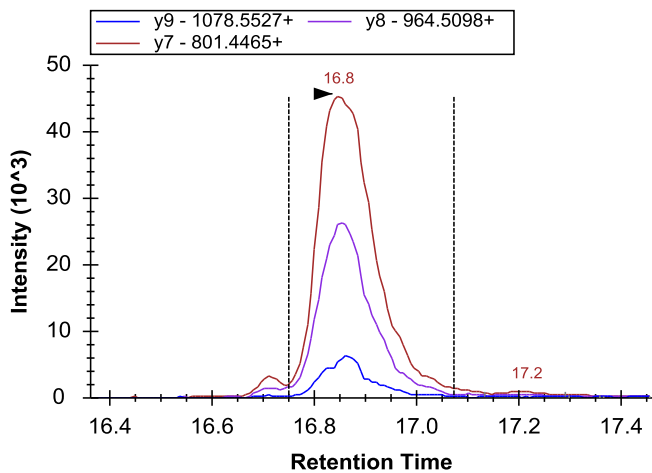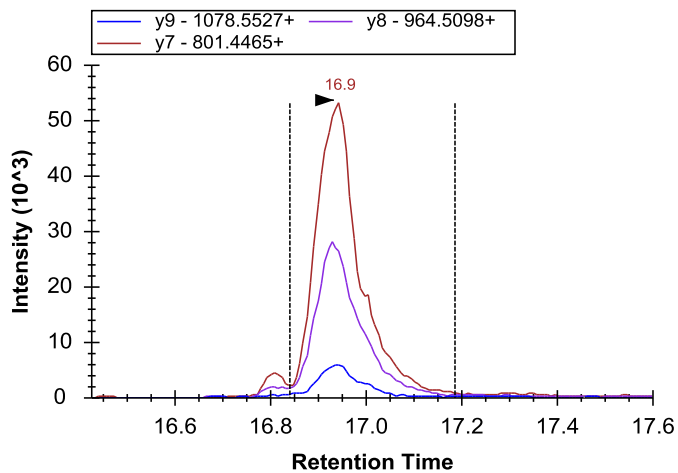

SAIC-16D, CALR, GLQTSQDAR.

H peptide transitions at 0.5 fmol/uL spike level; capture experiment 1 (left), capture experiment 2 (right).

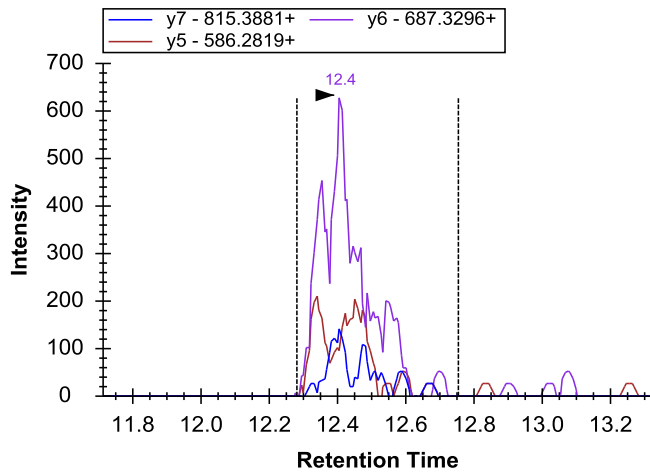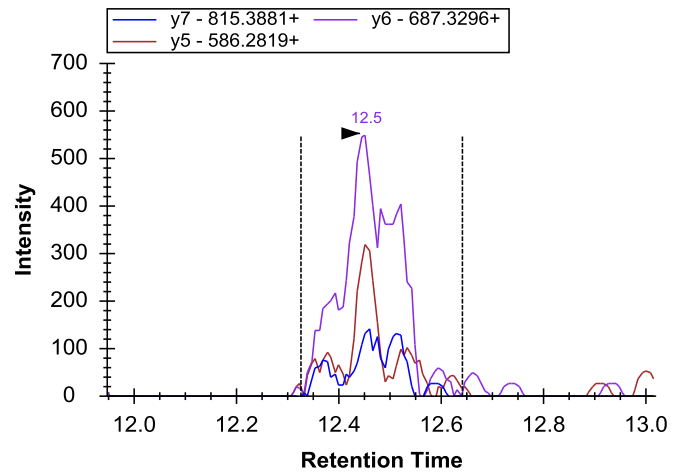

H peptide transitions at 5 fmol/uL spike level; capture experiment 1 (left), capture experiment 2 (right). The assay's grade (grade C) was given based on this spike level.

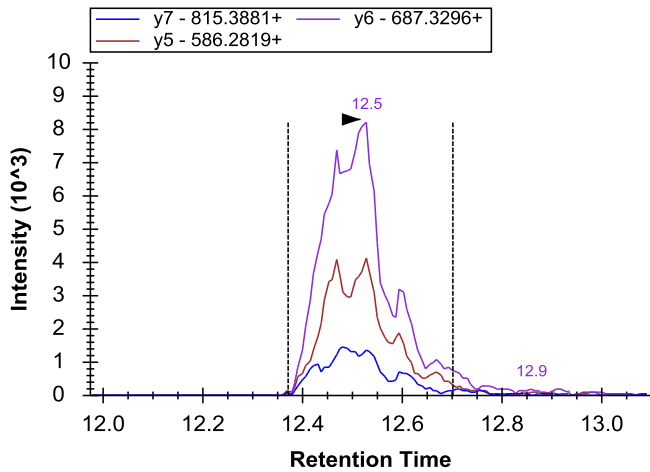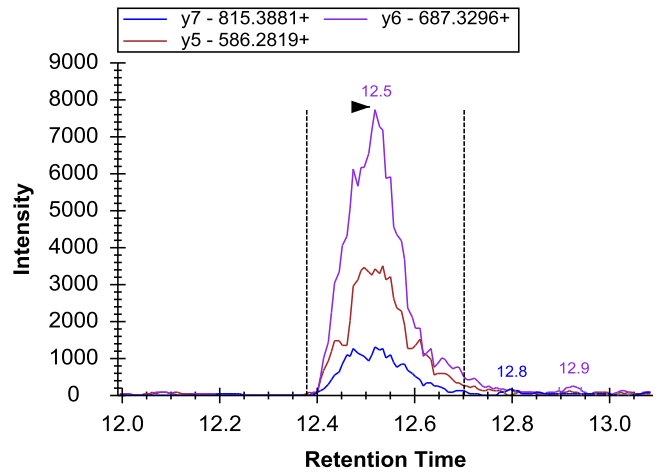

L peptide transitions, spiked at 10 fmol/uL; capture experiment 1 (left), capture experiment 2 (right).

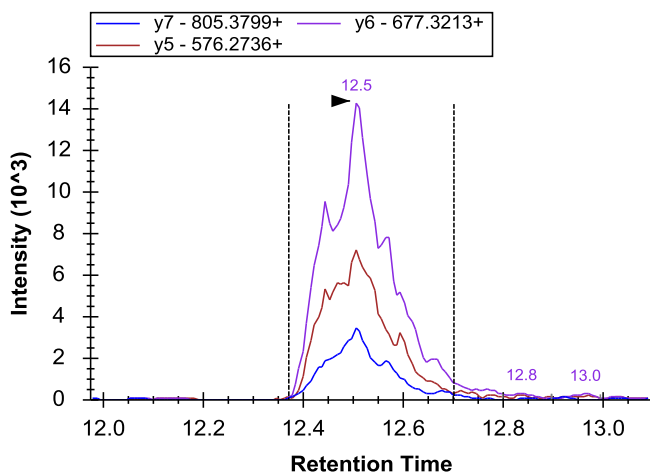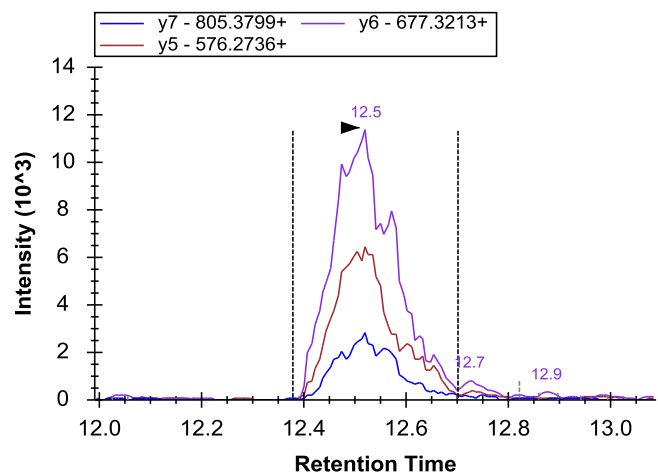

SAIC-19D, GRB2, FGNDVQHFK.

H peptide transitions at 0.5 fmol/uL spike level; capture experiment 1 (left), capture experiment 2 (right).

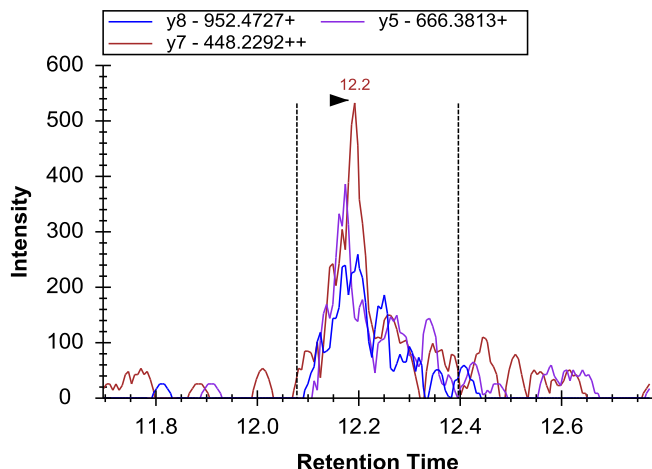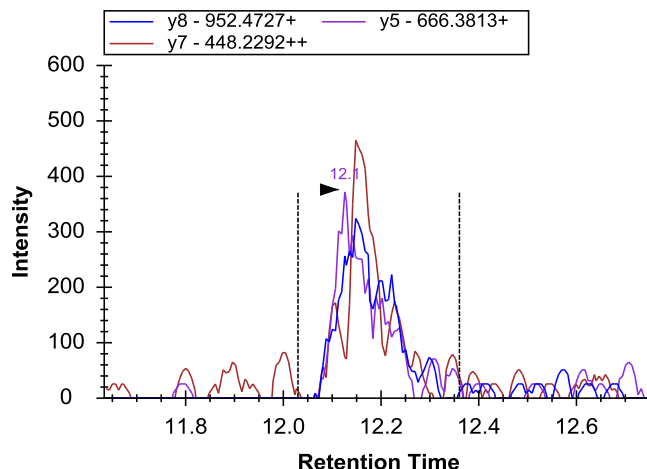

H peptide transitions at 5 fmol/uL spike level; capture experiment 1 (left), capture experiment 2 (right). The assay's grade (grade C) was given based on this spike level.

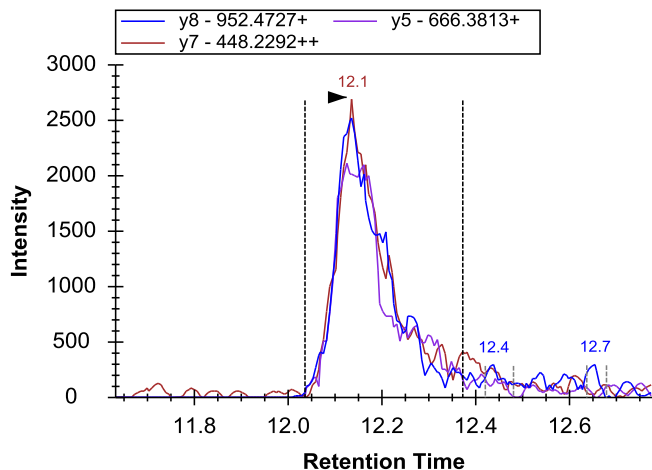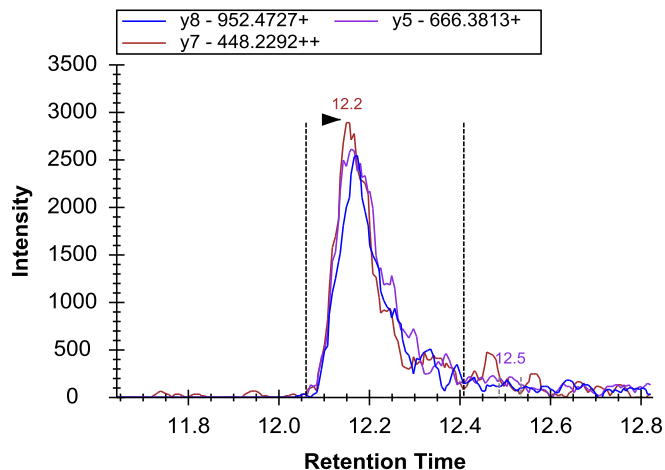

L peptide transitions, spiked at 10 fmol/uL; capture experiment 1 (left), capture experiment 2 (right).

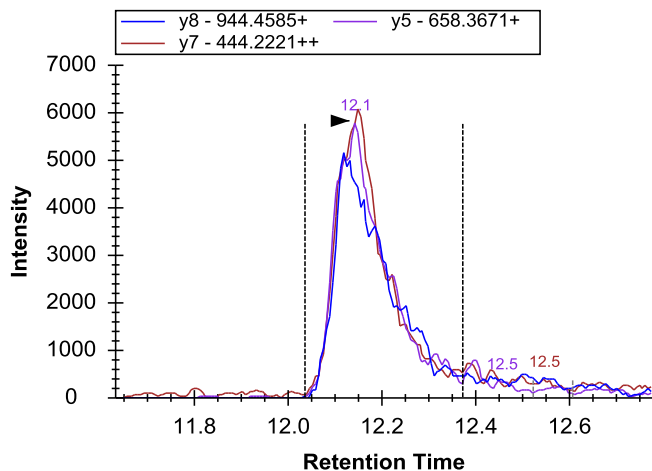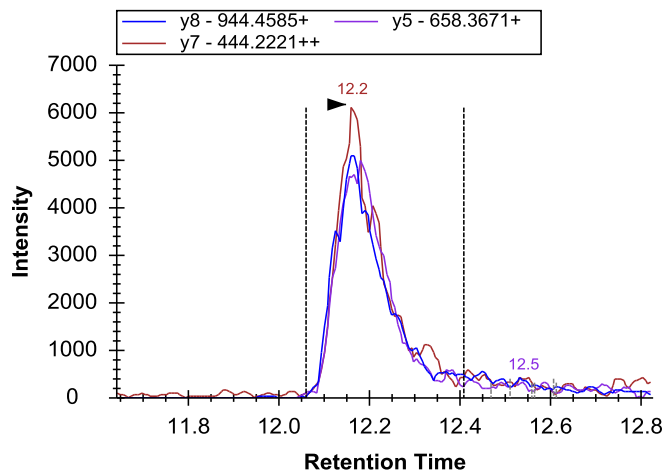

SAIC-21C, FEN1, SIEEIVR.

H peptide transitions at 0.5 fmol/uL spike level; capture experiment 1 (left), capture experiment 2 (right).

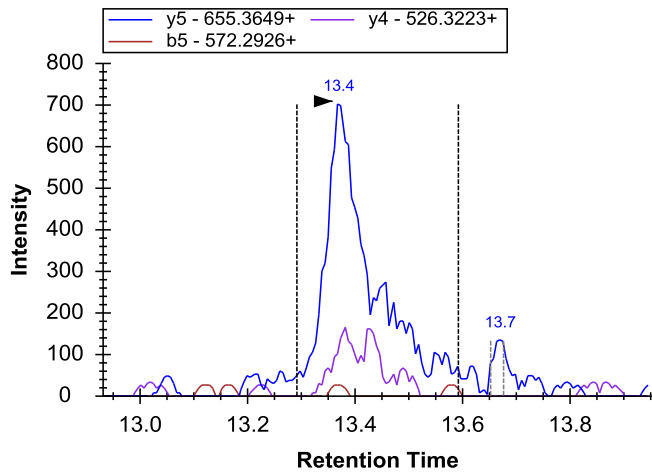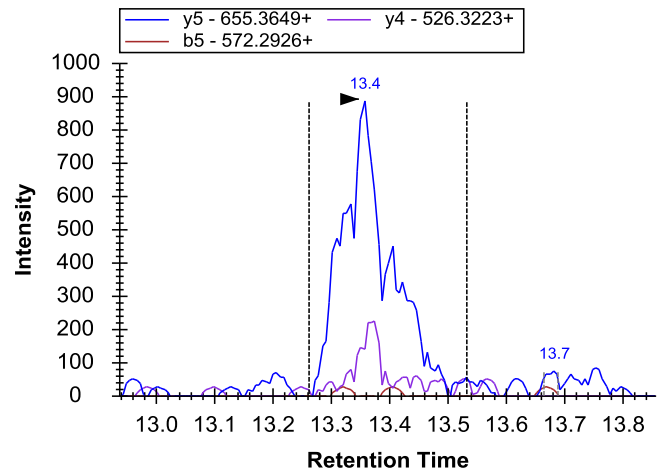

H peptide transitions at 5 fmol/uL spike level; capture experiment 1 (left), capture experiment 2 (right). The assay's grade (grade C) was given based on this spike level.

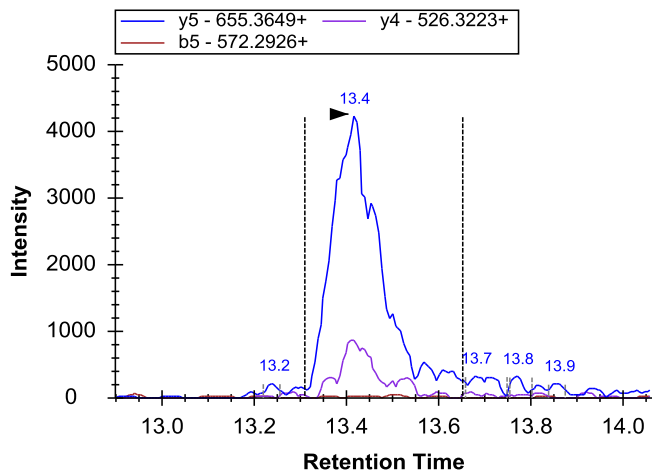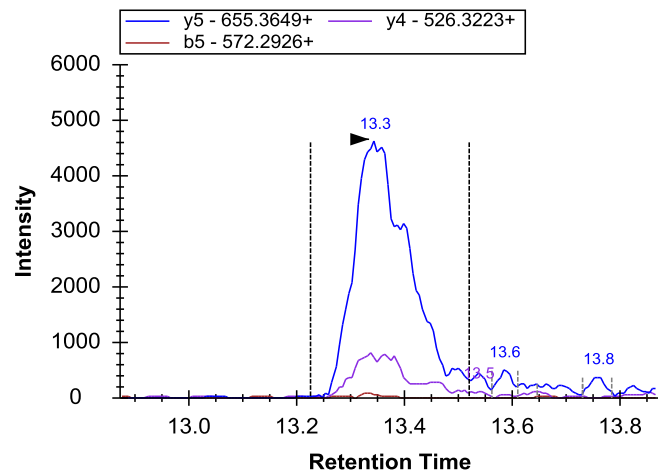

L peptide transitions, spiked at 10 fmol/uL; capture experiment 1 (left), capture experiment 2 (right).

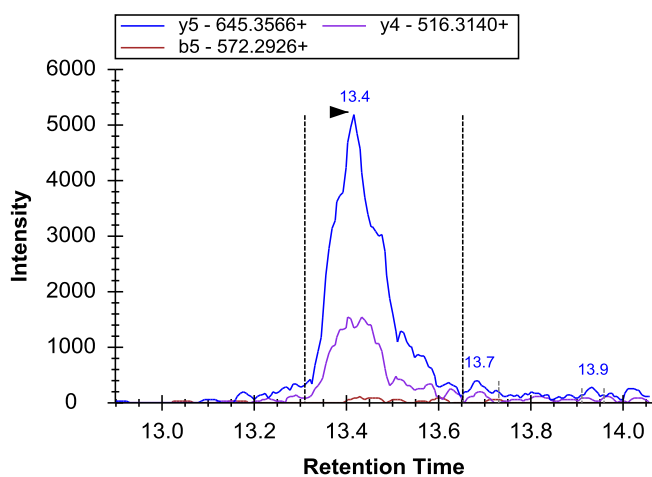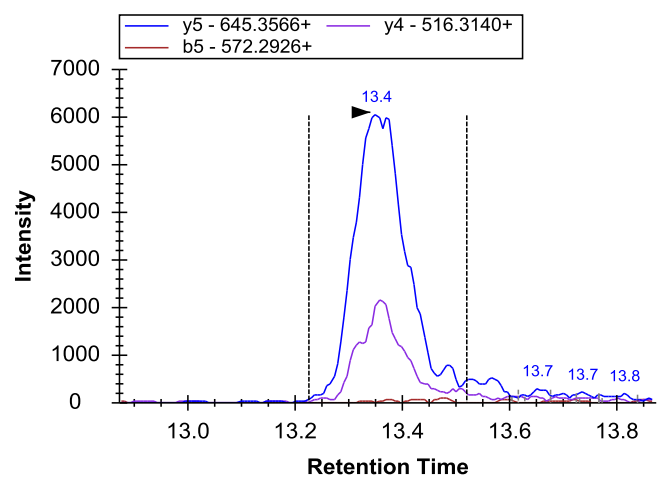

SAIC-22D, GSTP1, YISLIYTNYEAGK.

H peptide transitions at 0.05 fmol/uL spike level; capture experiment 1 (left), capture experiment 2 (right). The assay's grade (grade A-B) was given based on this and the next (0.5 fmol/uL) spike level.

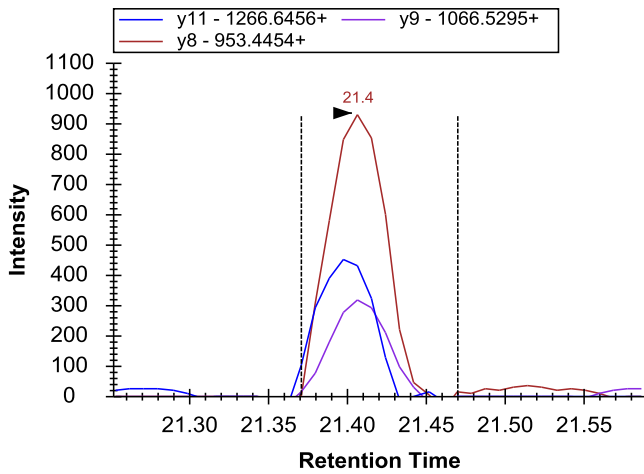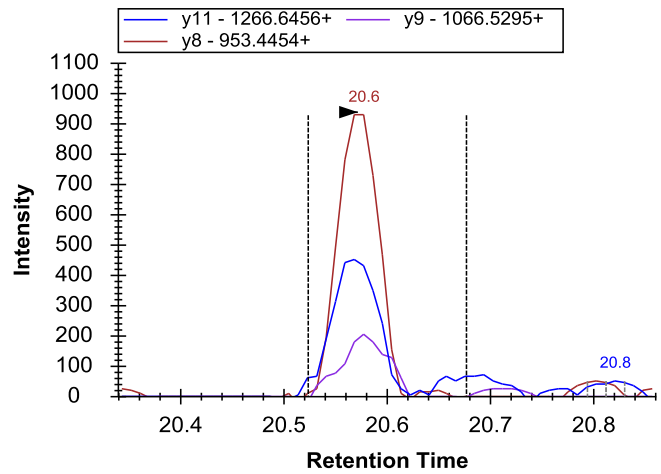

H peptide transitions at 0.5 fmol/uL spike level; capture experiment 1 (left), capture experiment 2 (right).

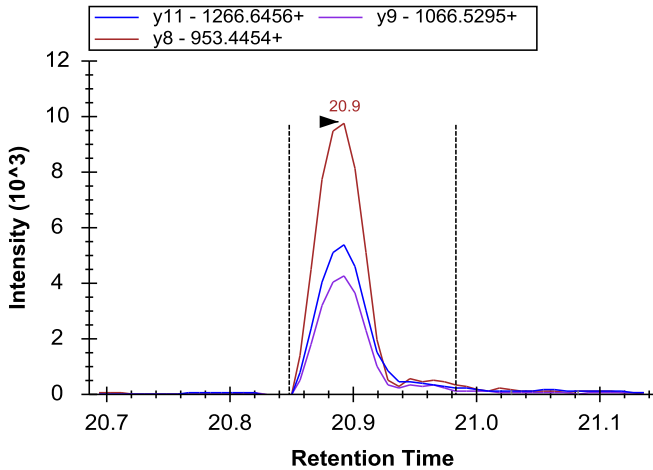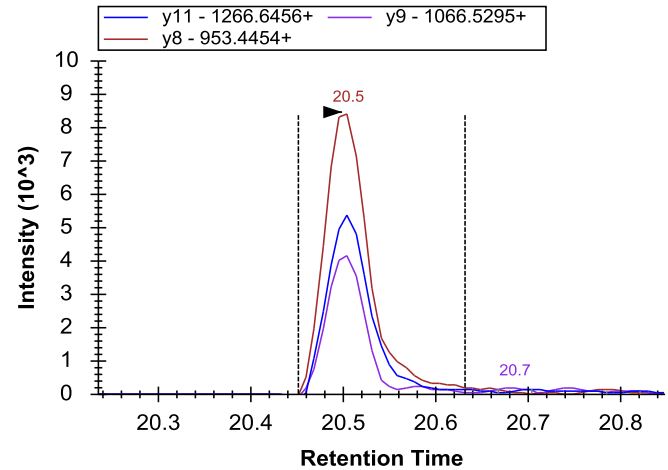

L peptide transitions, spiked at 10 fmol/uL; capture experiment 1 (left), capture experiment 2 (right).

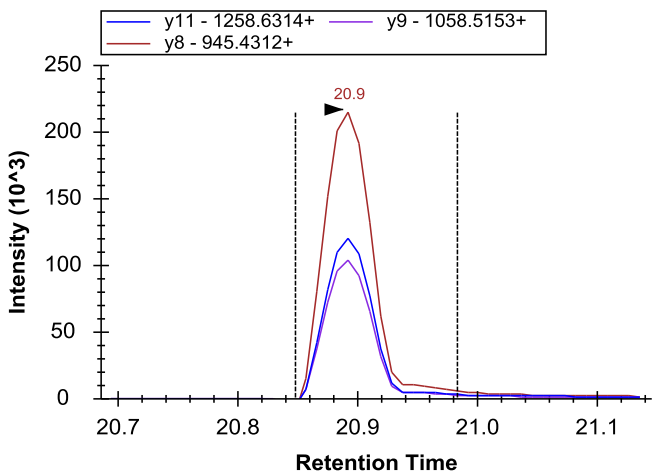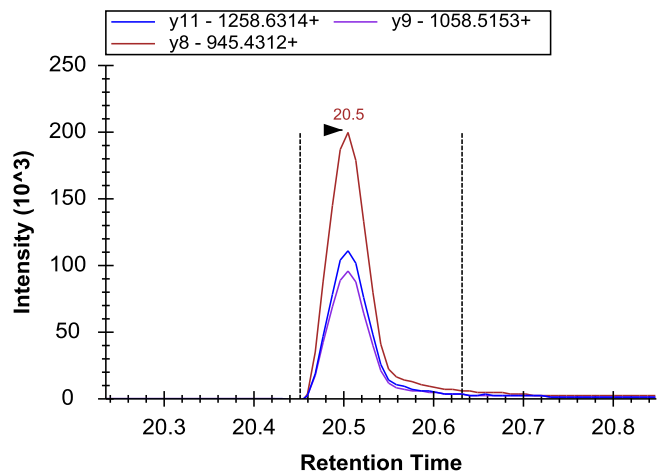

SAIC-23B, HSPB1, DGVVEITGK.

H peptide transitions at 0.05 fmol/uL spike level; capture experiment 1 (left), capture experiment 2 (right). The assay's grade (grade A) was given based on this spike level.

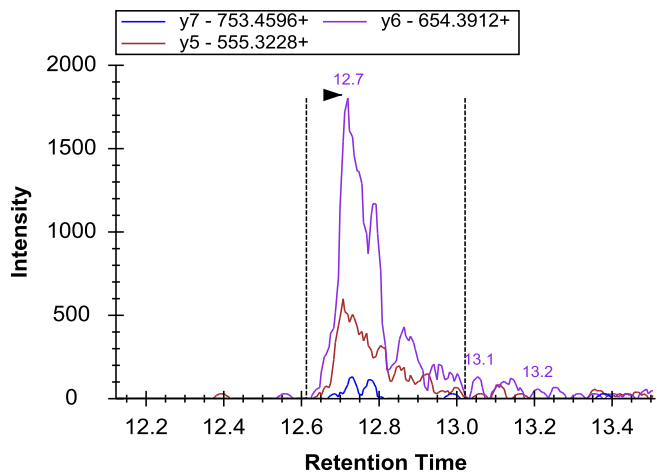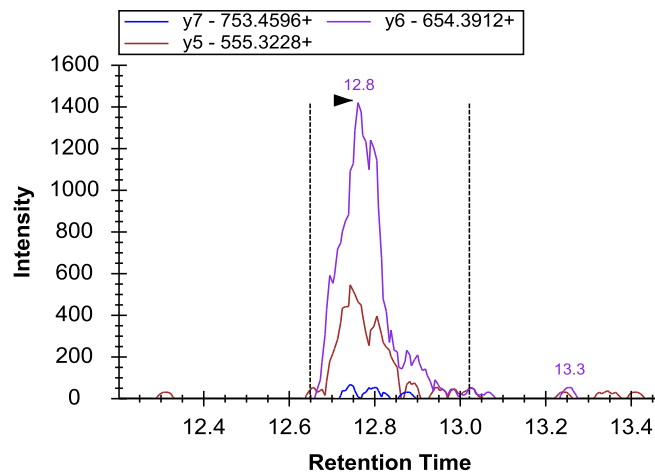

H peptide transitions at 0.5 fmol/uL spike level; capture experiment 1 (left), capture experiment 2 (right).

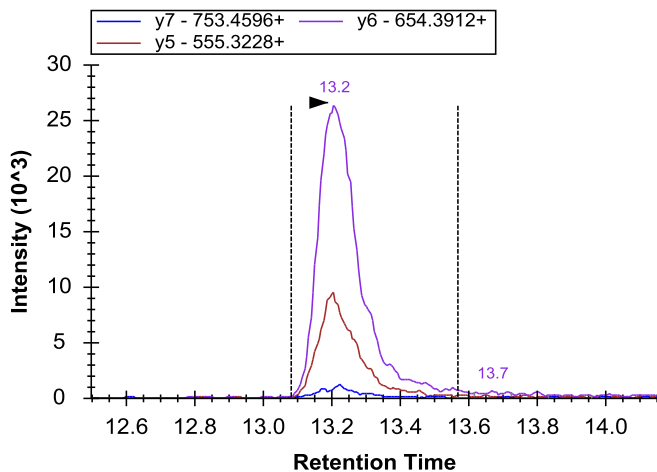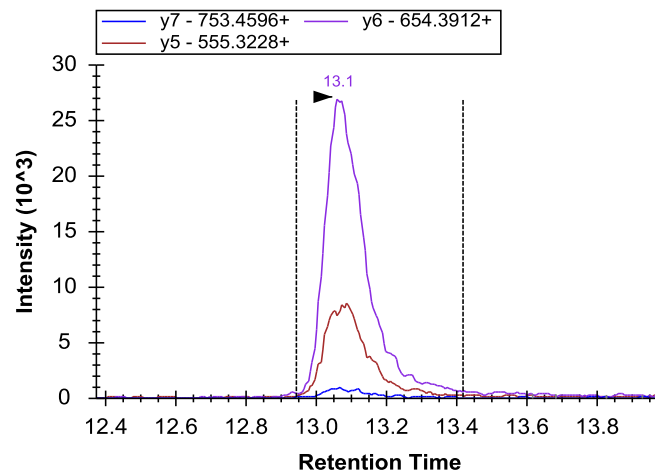

L peptide transitions, spiked at 10 fmol/uL; capture experiment 1 (left), capture experiment 2 (right).

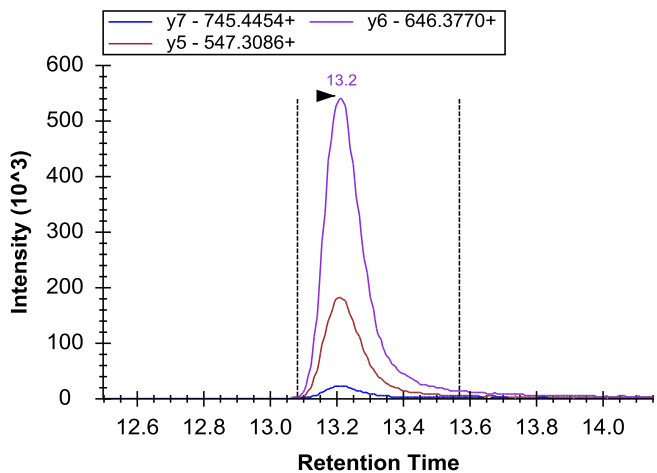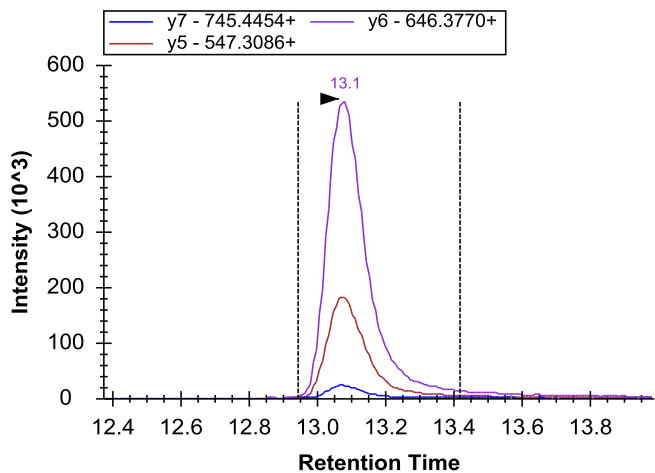

SAIC-23C, HSPB1, VSLDVNHFAPELTVK.

H peptide transitions at 0.5 fmol/uL spike level; capture experiment 1 (left), capture experiment 2 (right). The assay's grade (grade B) was given based on this spike level.

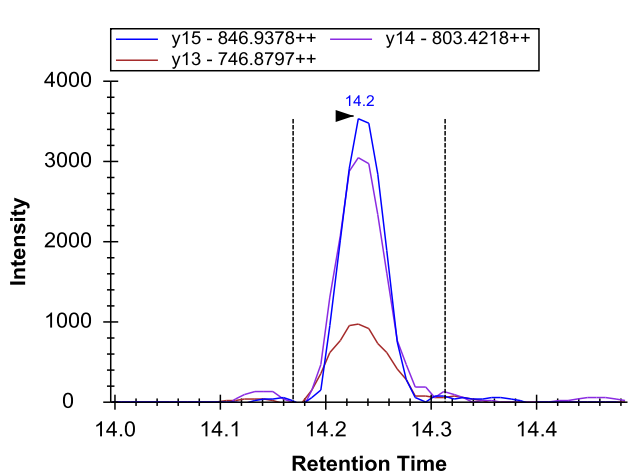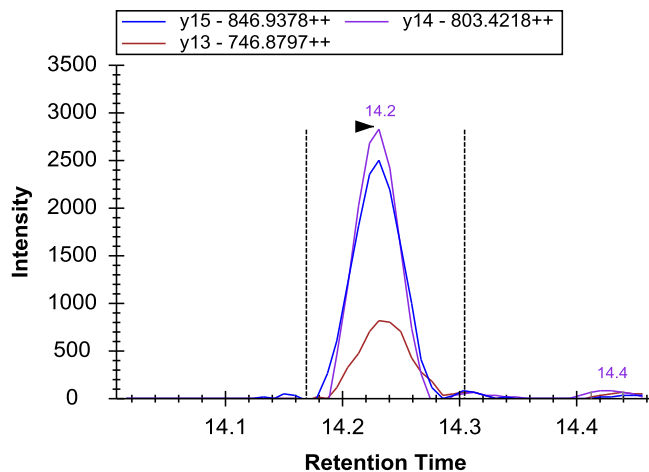

H peptide transitions at 5 fmol/uL spike level; capture experiment 1 (left), capture experiment 2 (right).

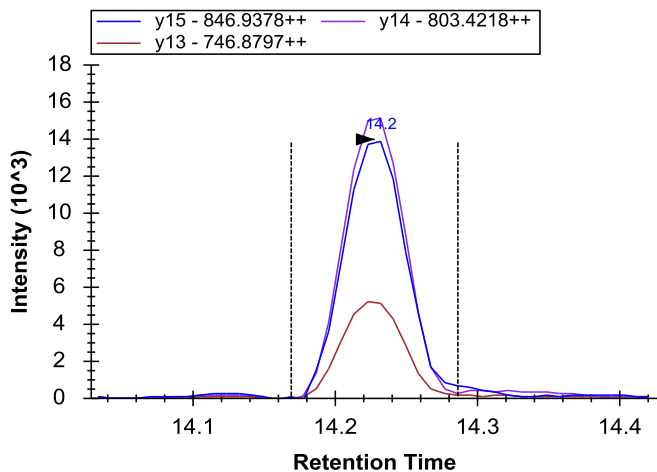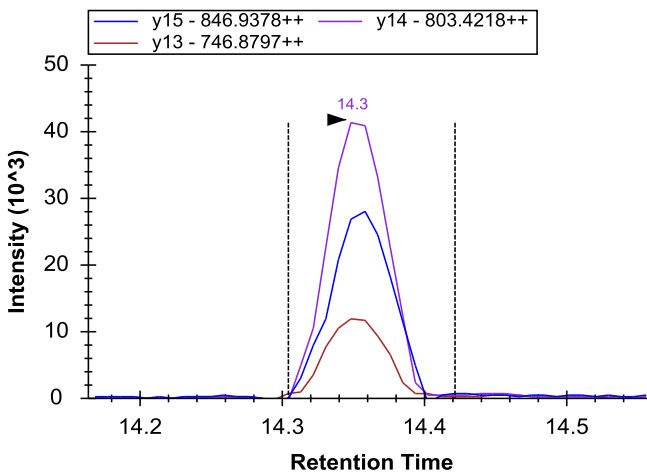

L peptide transitions, spiked at 10 fmol/uL; capture experiment 1 (left), capture experiment 2 (right).

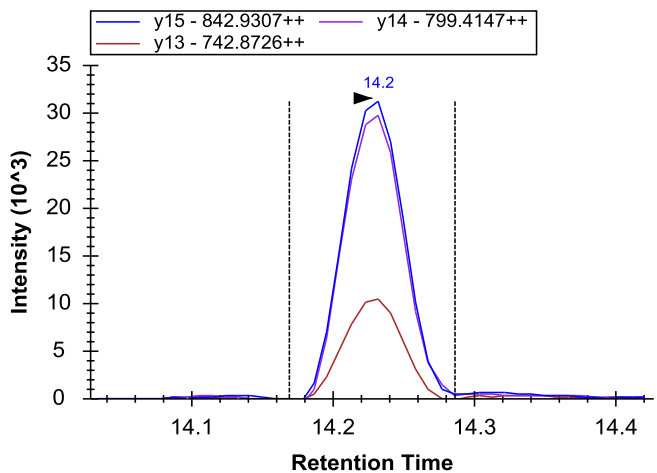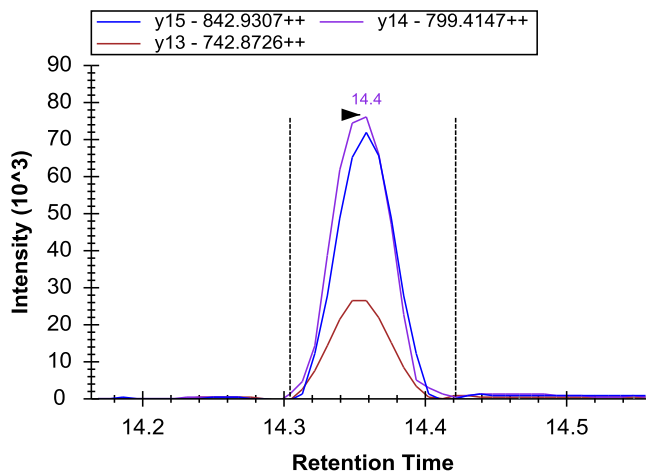

SAIC-23E, HSPB1, LFDQAFGLPR.

H peptide transitions at 0.05 fmol/uL spike level; capture experiment 1 (left), capture experiment 2 (right). The assay's grade (grade A) was given based on this spike level.

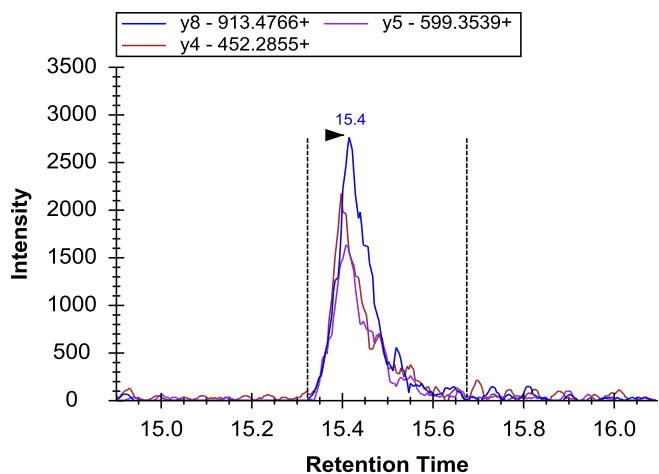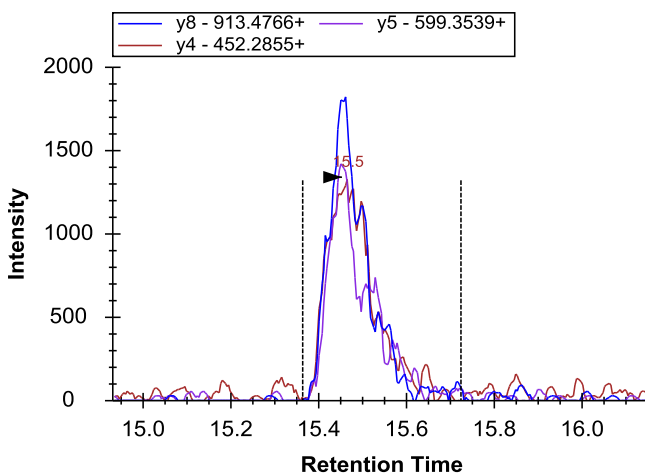

H peptide transitions at 0.5 fmol/uL spike level; capture experiment 1 (left), capture experiment 2 (right).

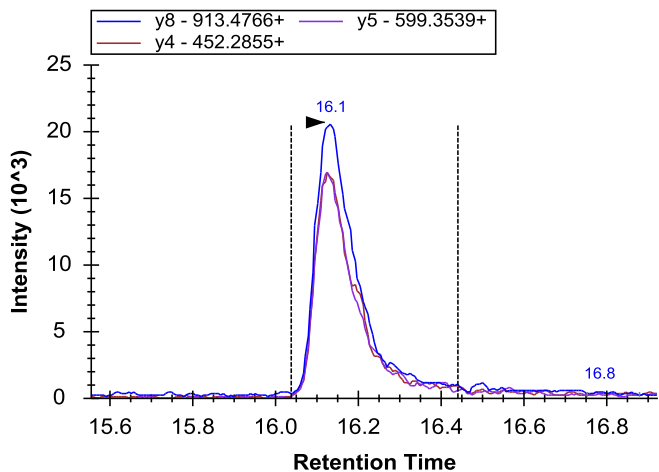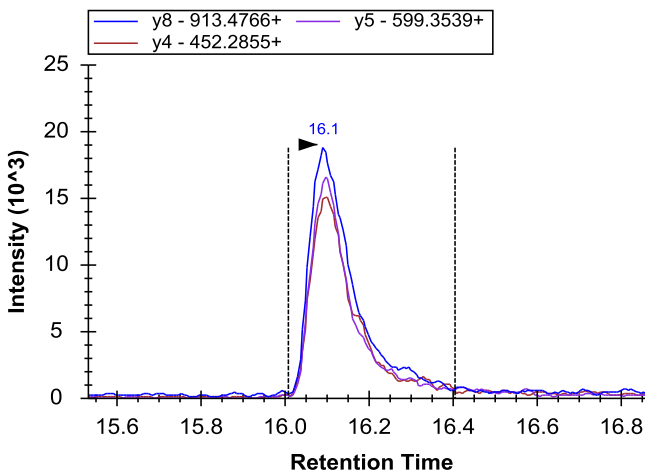

L peptide transitions, spiked at 10 fmol/uL; capture experiment 1 (left), capture experiment 2 (right).

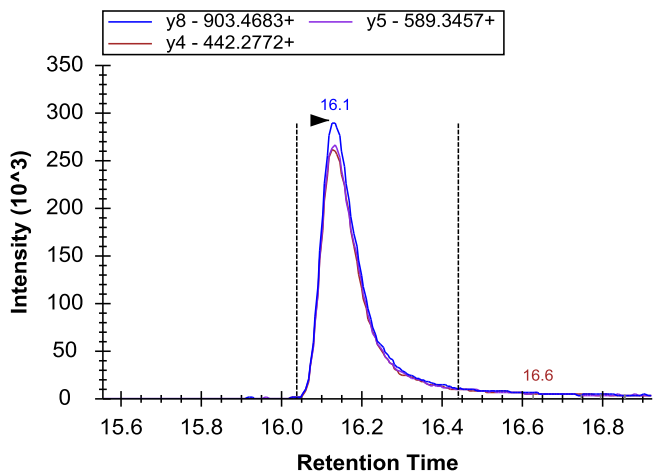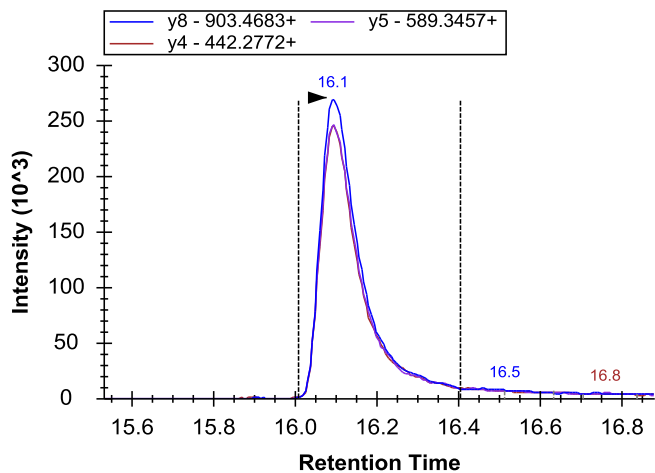



SAIC-24B, IL18, ISTLSCENK.

H peptide transitions at 0.05 fmol/uL spike level; capture experiment 1 (left), capture experiment 2 (right). The assay's grade (grade A-B) was given based on this and the next (0.5 fmol/uL) spike level.

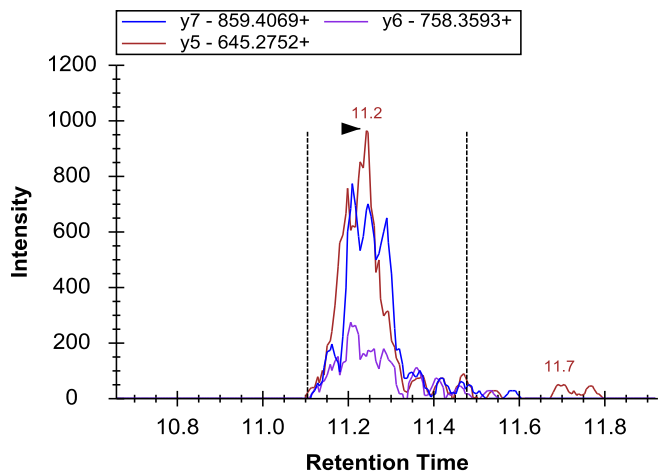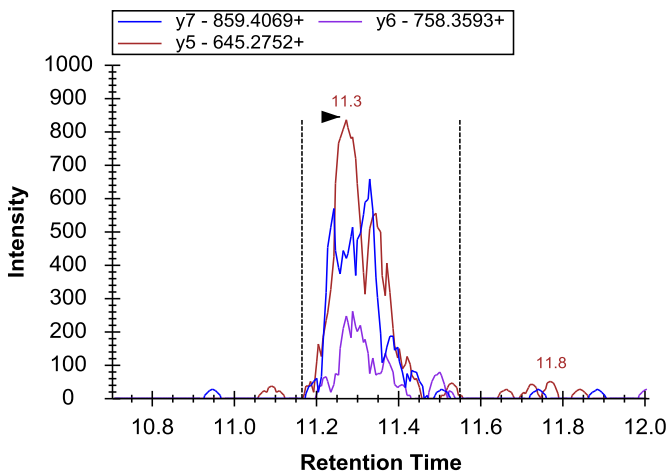

H peptide transitions at 0.5 fmol/uL spike level; capture experiment 1 (left), capture experiment 2 (right).

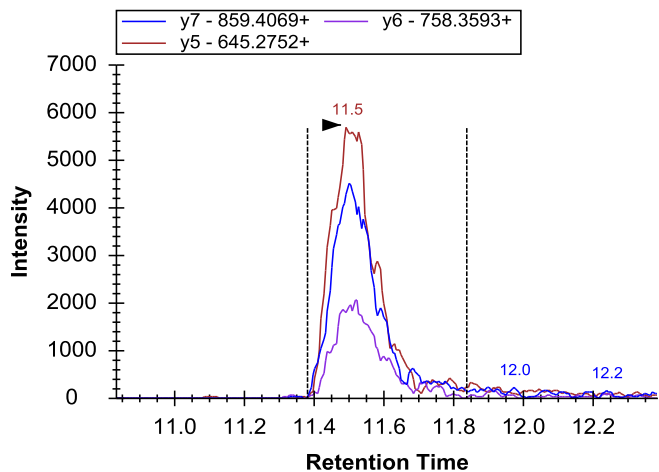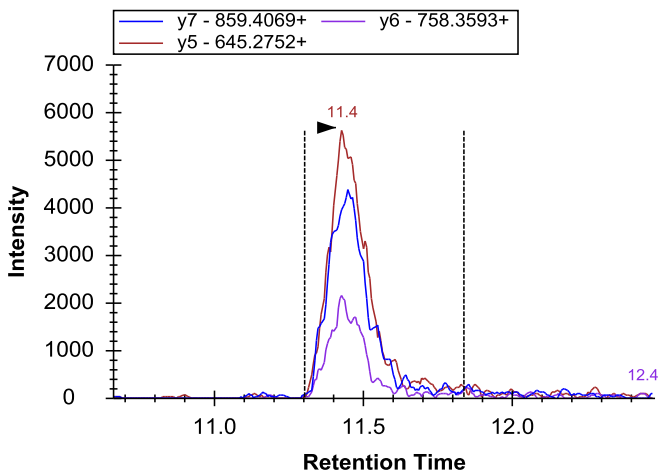

L peptide transitions, spiked at 10 fmol/uL; capture experiment 1 (left), capture experiment 2 (right).

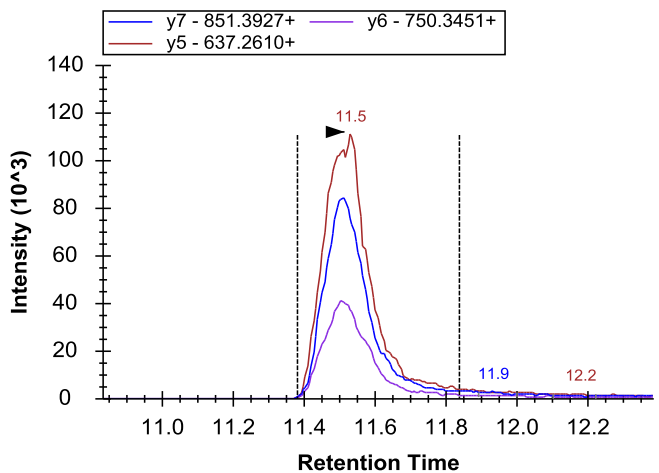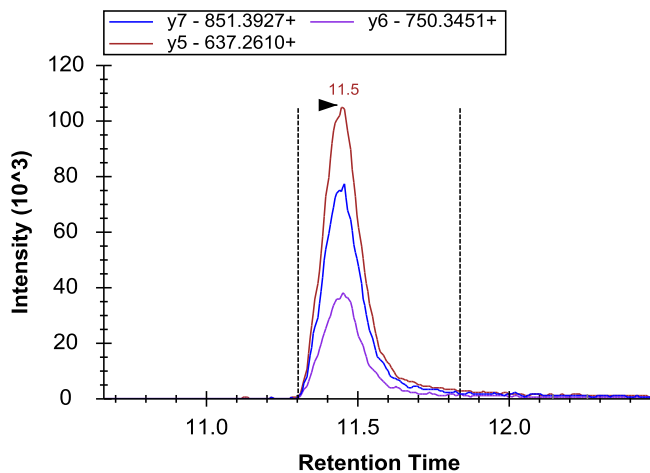

SAIC-25B, LGALS1, SFVLNLGK.

H peptide transitions at 0.05 fmol/uL spike level; capture experiment 1 (left), capture experiment 2 (right). The assay's grade (grade A) was given based on this spike level.

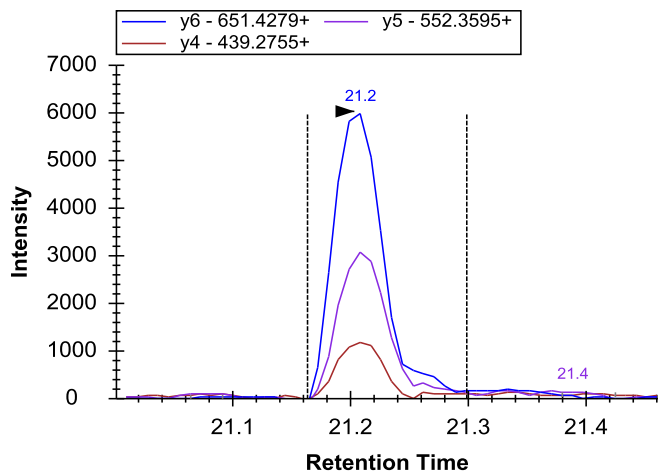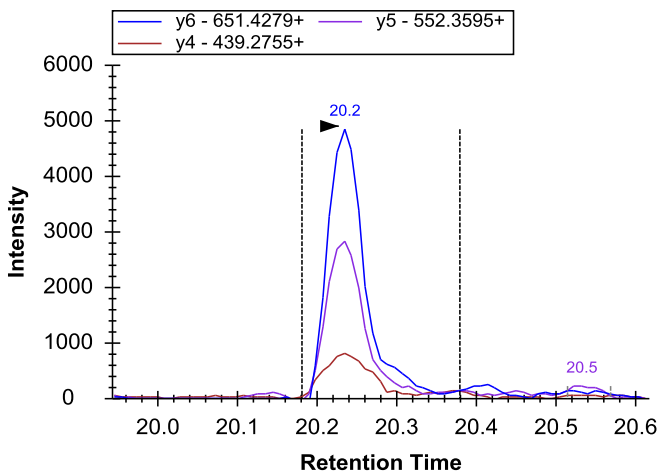

H peptide transitions at 0.5 fmol/uL spike level; capture experiment 1 (left), capture experiment 2 (right).

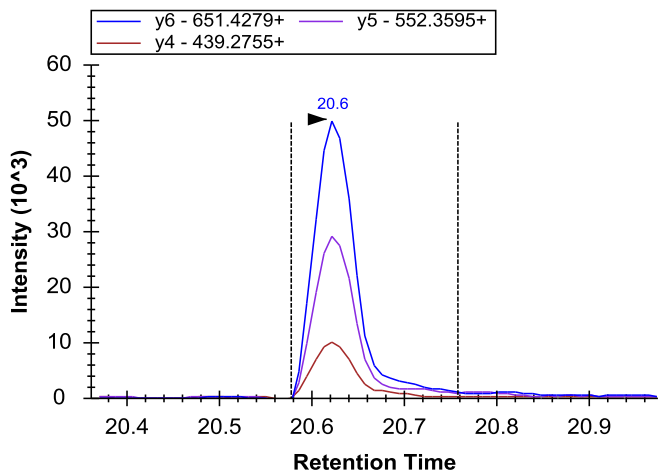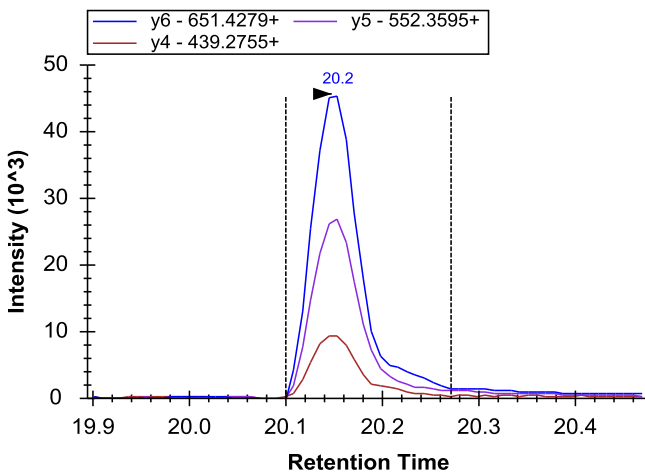

L peptide transitions, spiked at 10 fmol/uL; capture experiment 1 (left), capture experiment 2 (right).

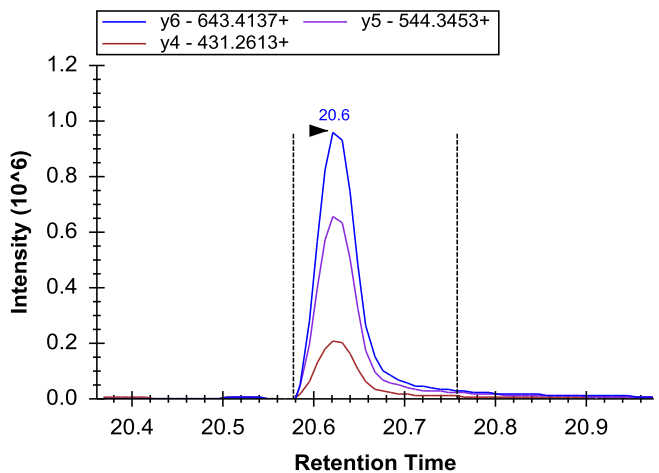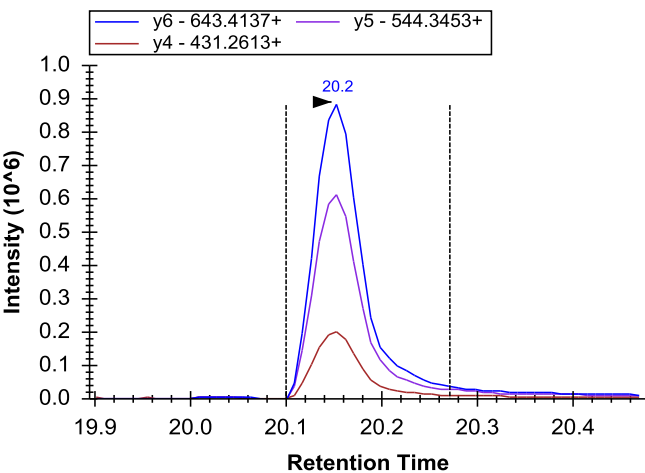

SAIC-26C, NFKB2, IEVDLVTHSDPPR.

H peptide transitions at 0.05 fmol/uL spike level; capture experiment 1 (left), capture experiment 2 (right).

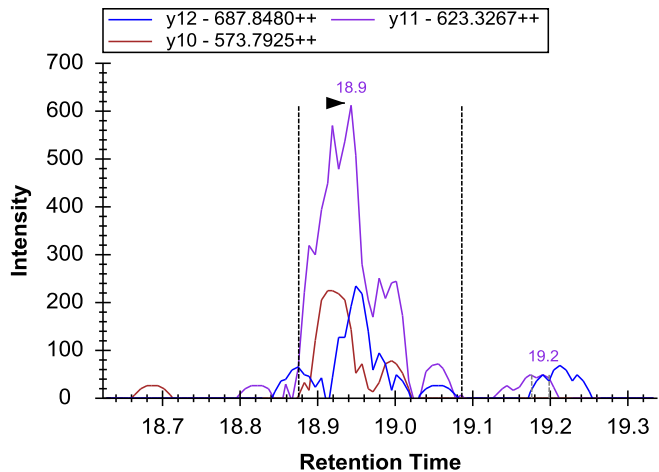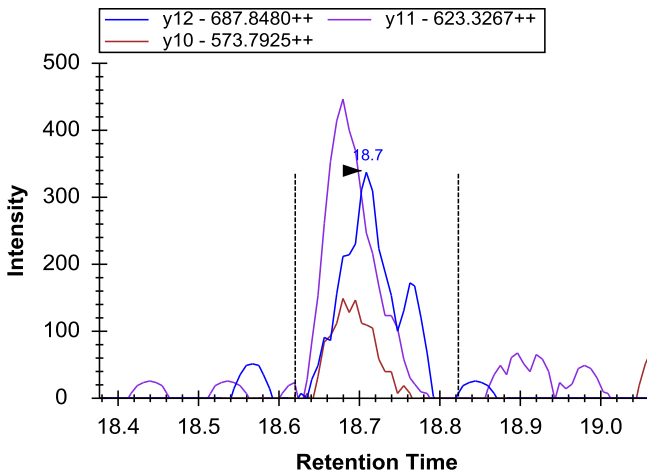

H peptide transitions at 0.5 fmol/uL spike level; capture experiment 1 (left), capture experiment 2 (right). The assay's grade (grade B) was given based on this spike level.

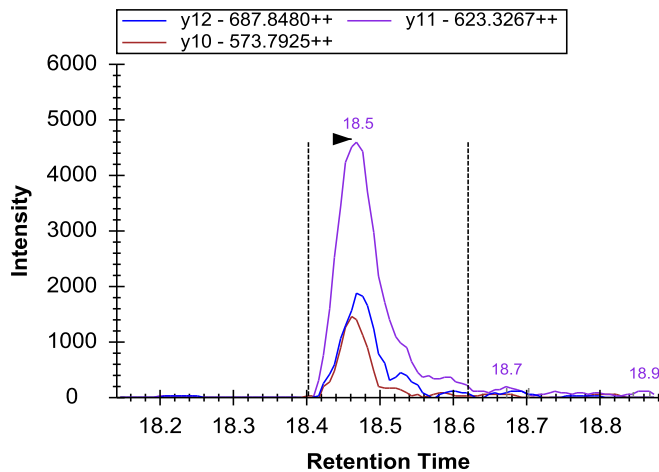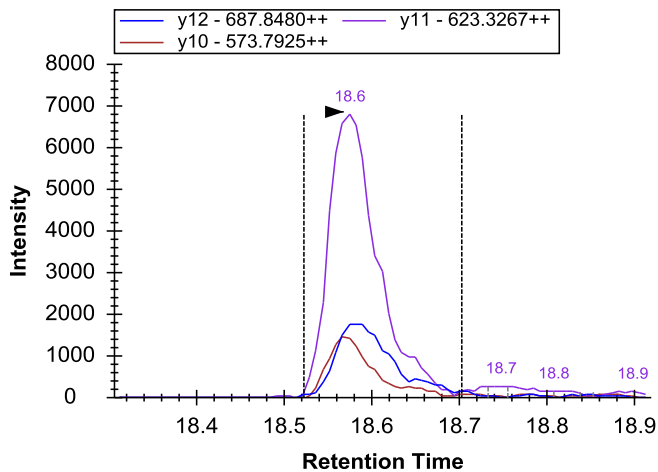

L peptide transitions, spiked at 10 fmol/uL; capture experiment 1 (left), capture experiment 2 (right).

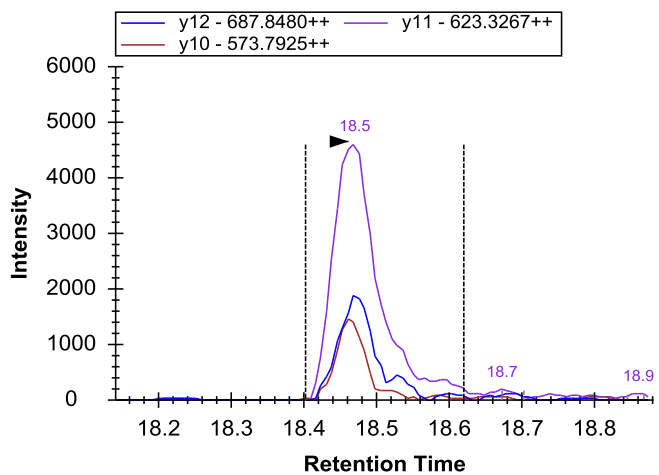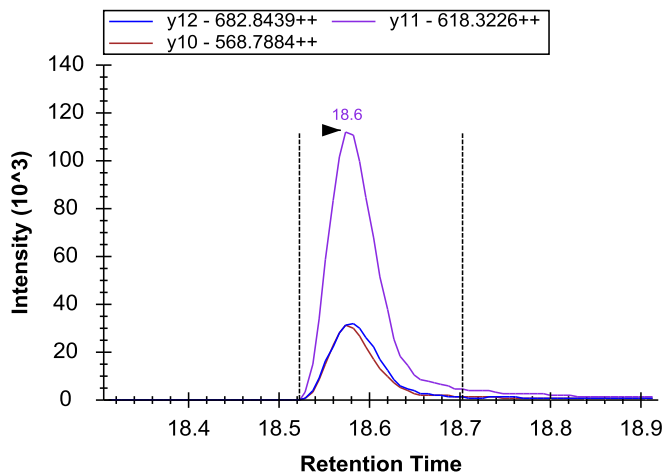

SAIC-27C, PCNA, LVQGSILK.

H peptide transitions at 0.05 fmol/uL spike level; capture experiment 1 (left), capture experiment 2 (right). The assay's grade (grade A) was given based on this spike level.

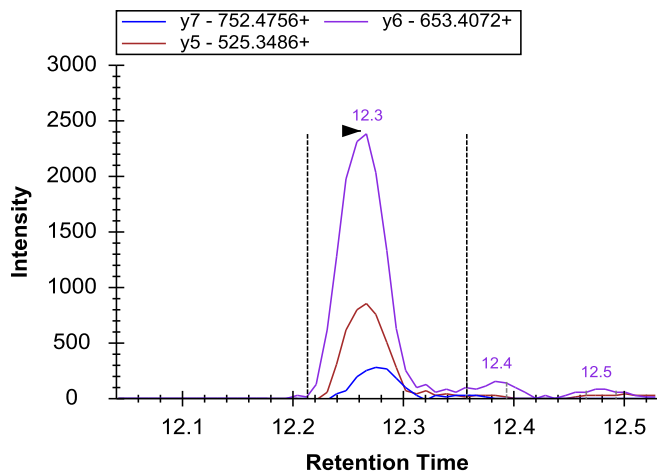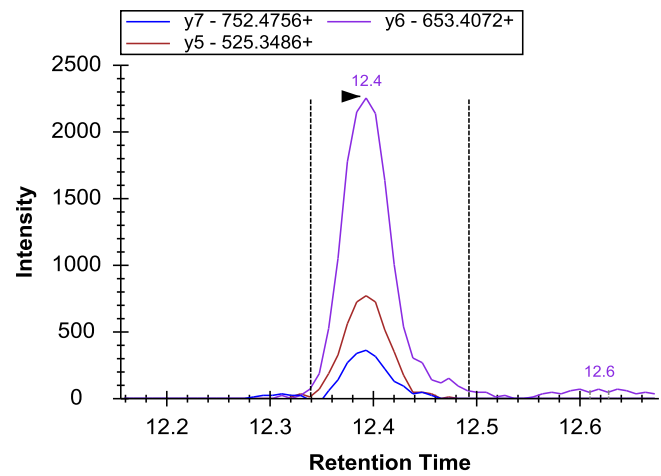

H peptide transitions at 0.5 fmol/uL spike level; capture experiment 1 (left), capture experiment 2 (right).

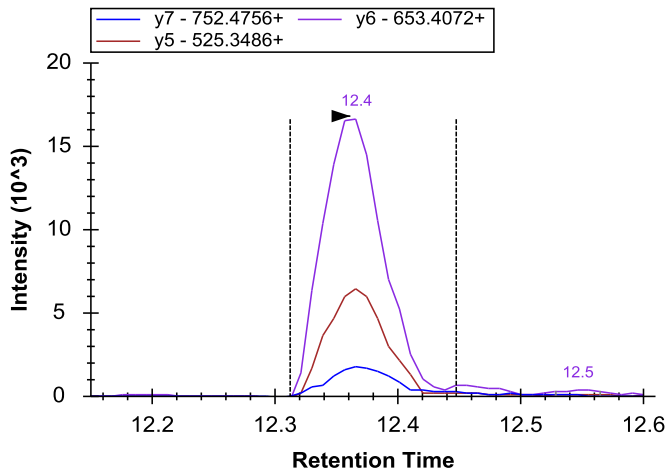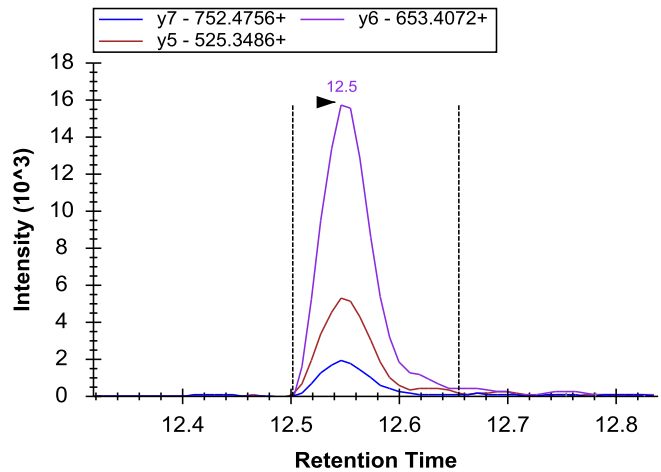

L peptide transitions, spiked at 10 fmol/uL; capture experiment 1 (left), capture experiment 2 (right).

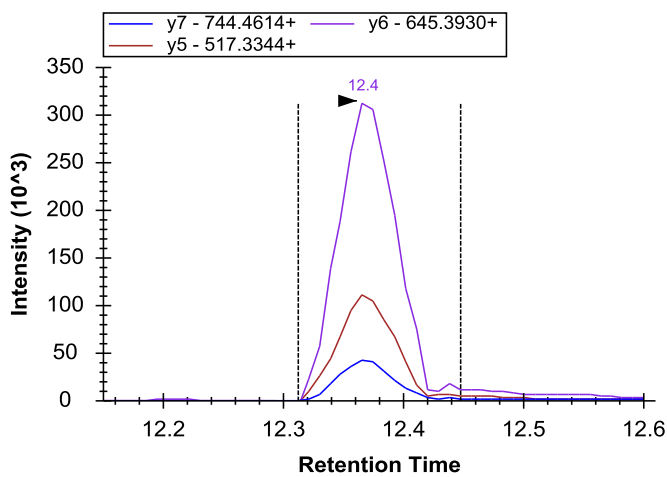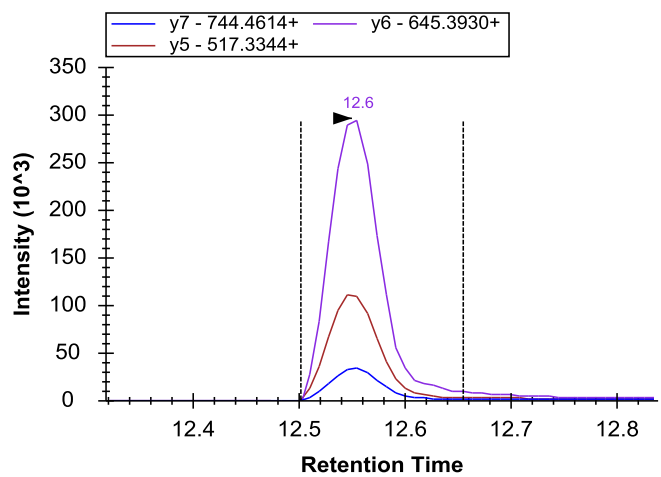

SAIC-28A, RAD23B, ILNDDTALK.

H peptide transitions at 0.05 fmol/uL spike level; capture experiment 1 (left), capture experiment 2 (right).

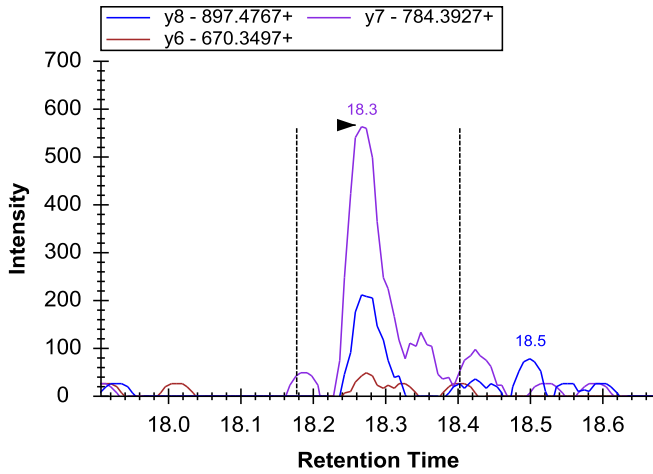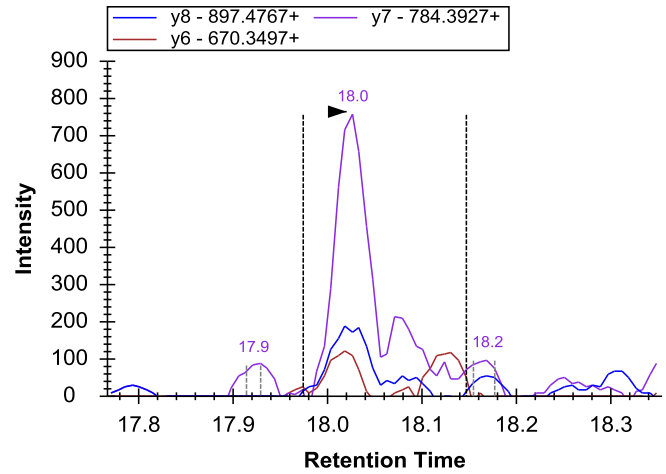

H peptide transitions at 0.5 fmol/uL spike level; capture experiment 1 (left), capture experiment 2 (right). The assay's grade (grade B) was given based on this spike level.

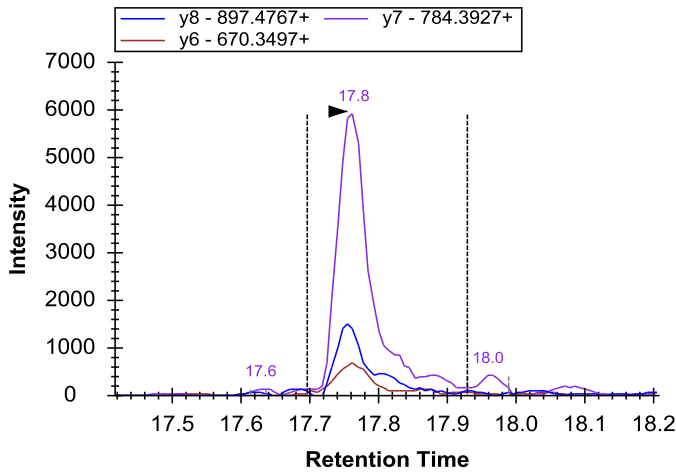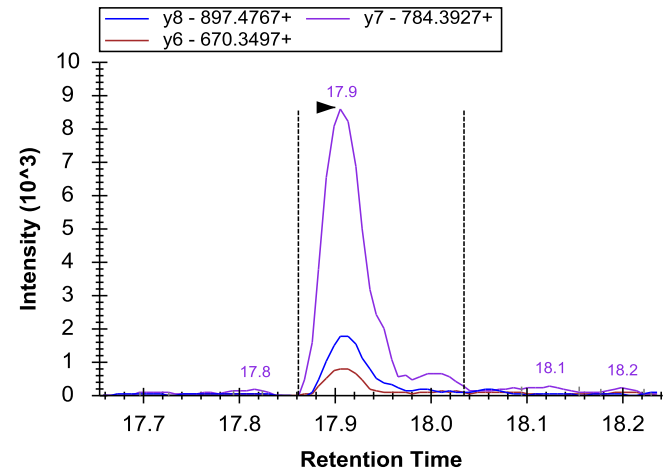

L peptide transitions, spiked at 10 fmol/uL; capture experiment 1 (left), capture experiment 2 (right).

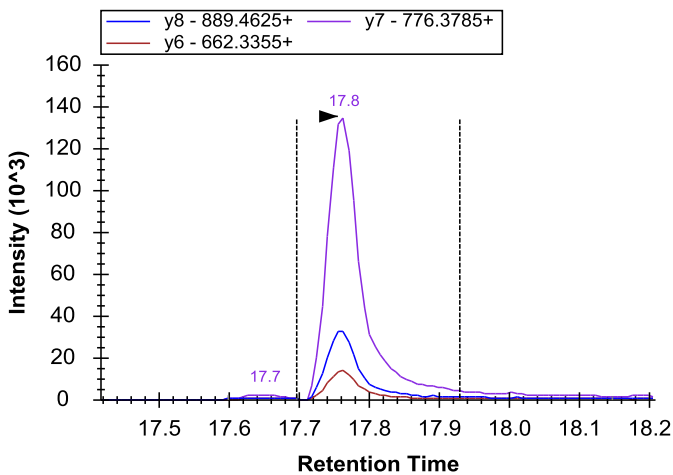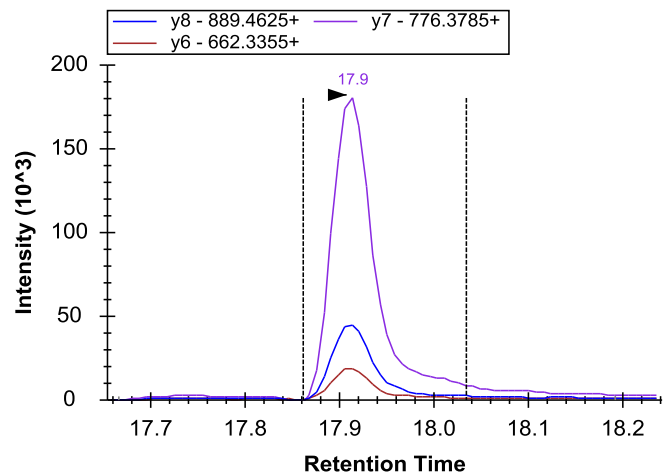

SAIC-28B, RAD23B, IDIDPEETVK.

H peptide transitions at 0.05 fmol/uL spike level; capture experiment 1 (left), capture experiment 2 (right). The assay's grade (grade A-B) was given based on this and the next (0.5 fmol/uL) spike level.

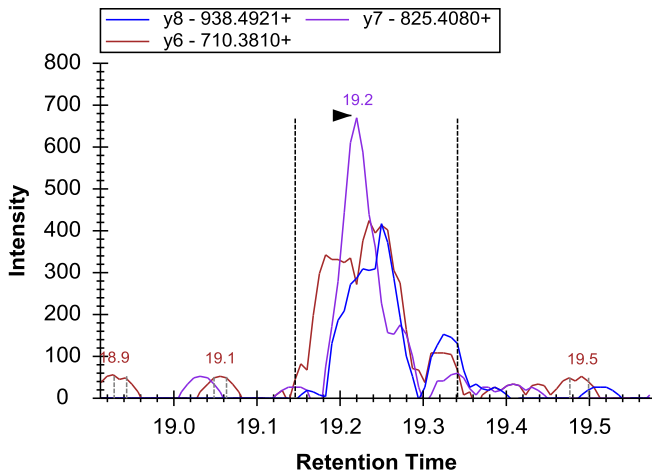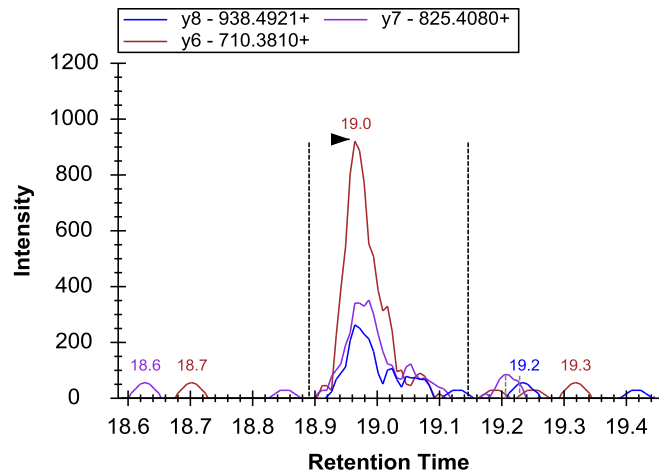

H peptide transitions at 0.5 fmol/uL spike level; capture experiment 1 (left), capture experiment 2 (right).

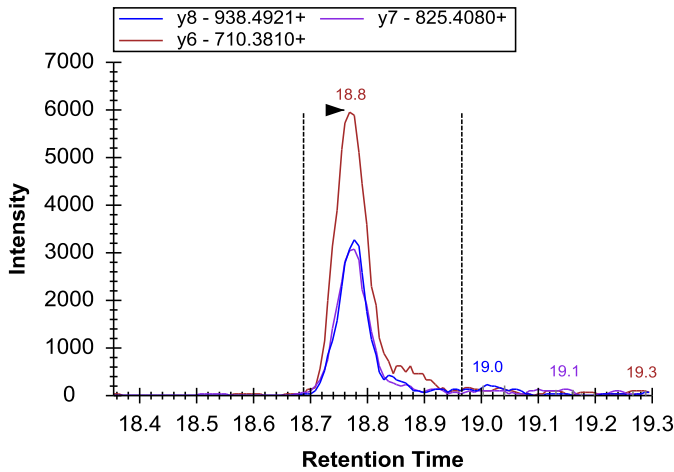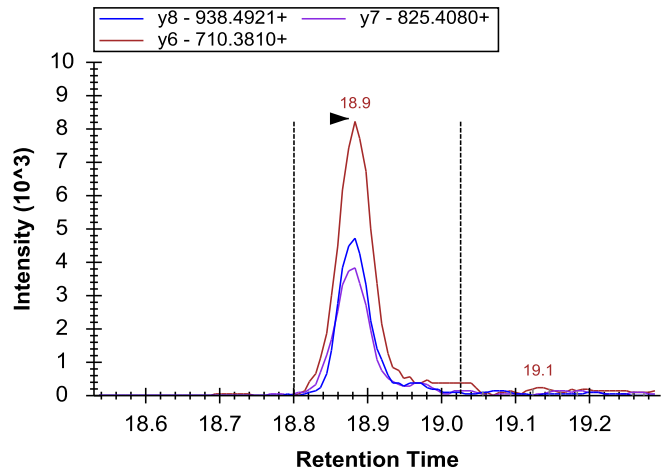

L peptide transitions, spiked at 10 fmol/uL; capture experiment 1 (left), capture experiment 2 (right).

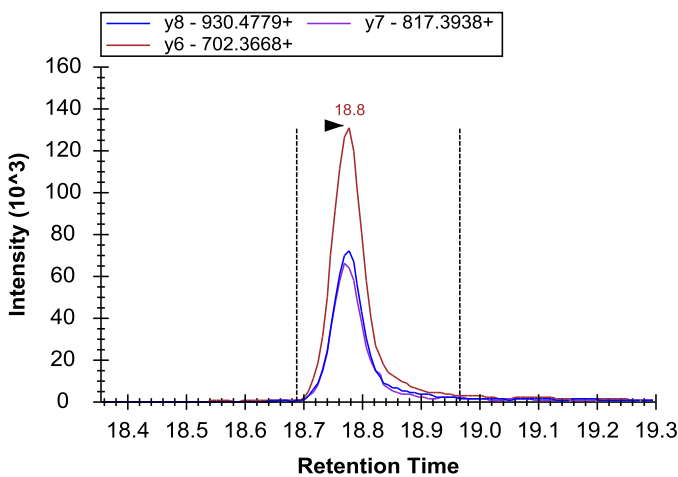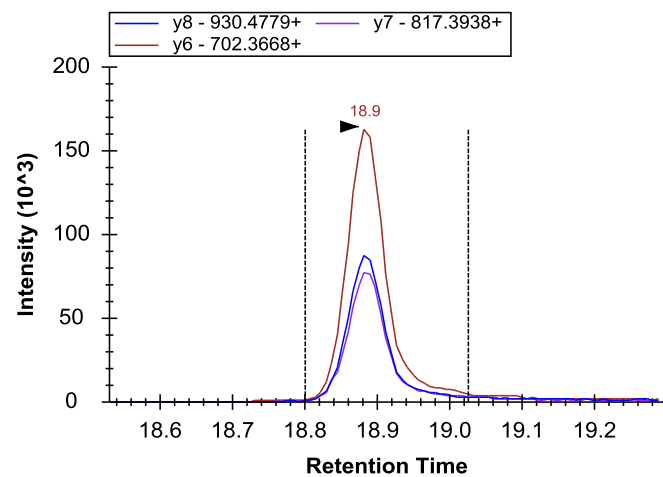

SAIC-30C, RRM2, IEQEFLTEALPVK.

H peptide transitions at 0.05 fmol/uL spike level; capture experiment 1 (left), capture experiment 2 (right). The assay's grade (grade A-B) was given based on this and the next (0.5 fmol/uL) spike level.

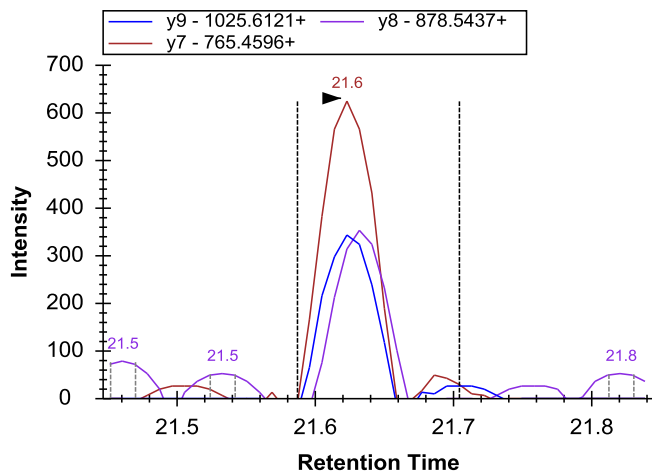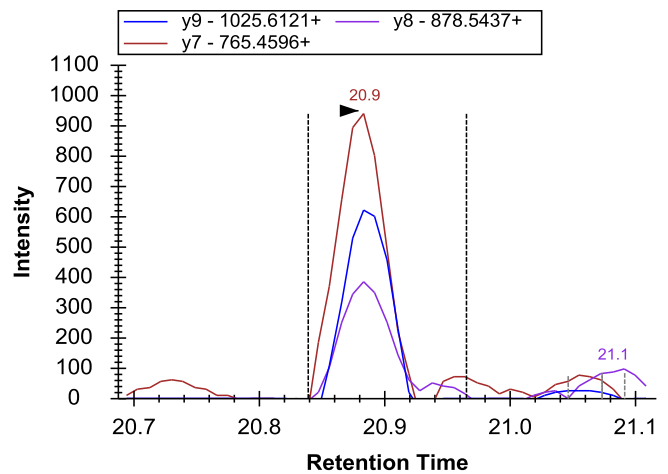

H peptide transitions at 0.5 fmol/uL spike level; capture experiment 1 (left), capture experiment 2 (right).

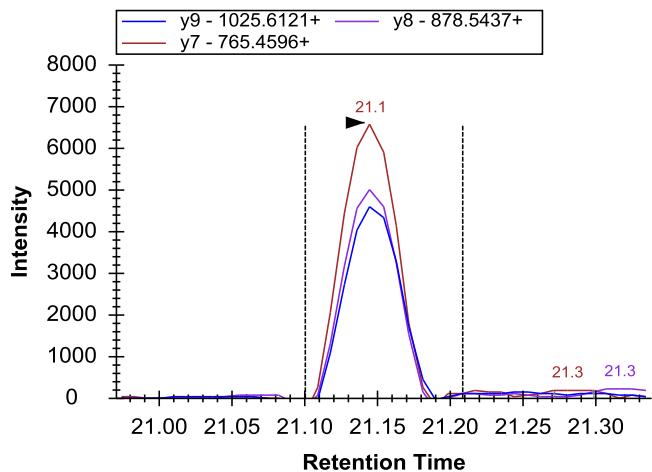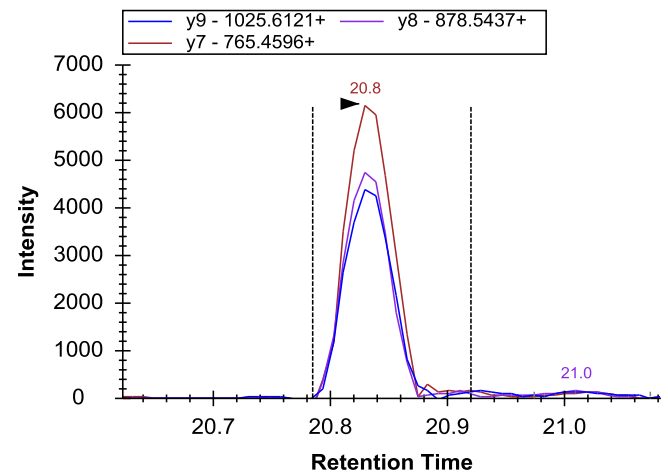

L peptide transitions, spiked at 10 fmol/uL; capture experiment 1 (left), capture experiment 2 (right).

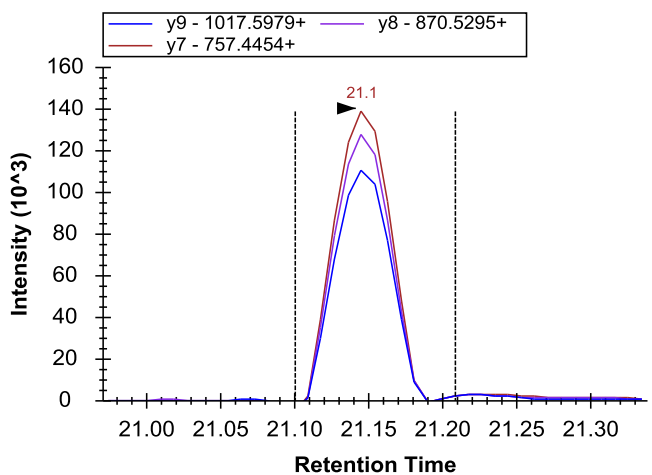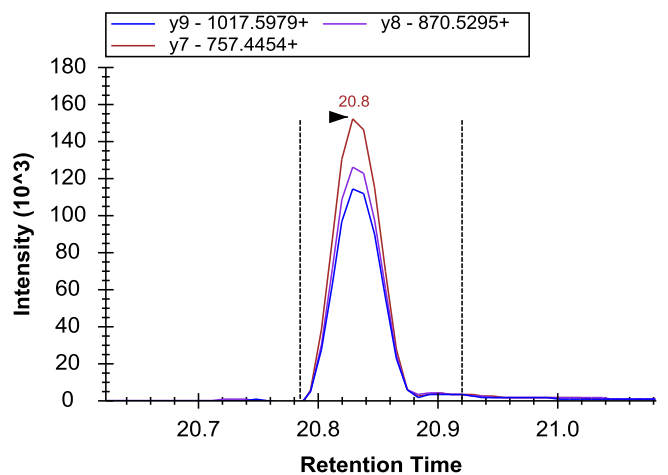

SAIC-30E, RRM2, DIQHWESLKPEER.

H peptide transitions at 0.5 fmol/uL spike level; capture experiment 1 (left), capture experiment 2 (right).

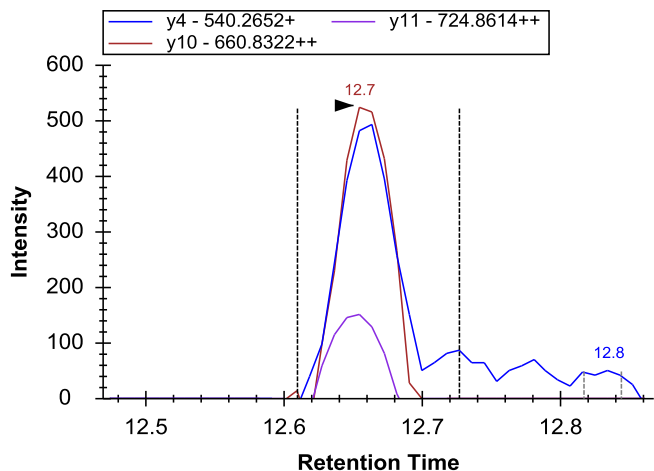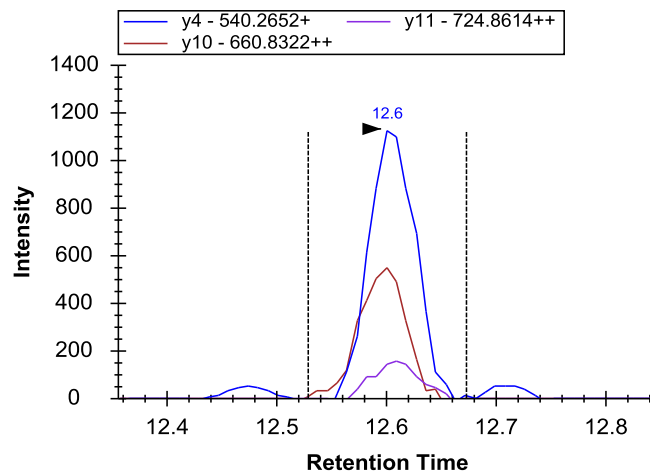

H peptide transitions at 5 fmol/uL spike level; capture experiment 1 (left), capture experiment 2 (right). The assay's grade (grade C) was given based on this spike level.

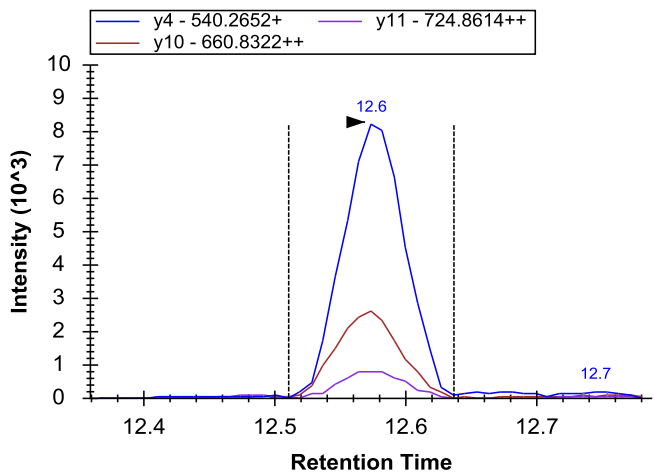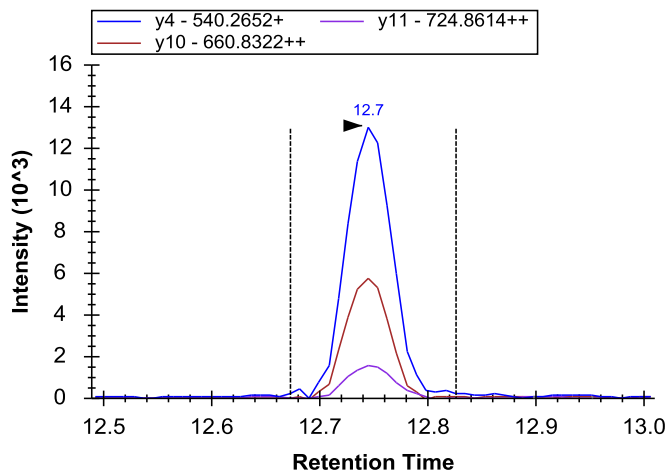

L peptide transitions, spiked at 10 fmol/uL; capture experiment 1 (left), capture experiment 2 (right).

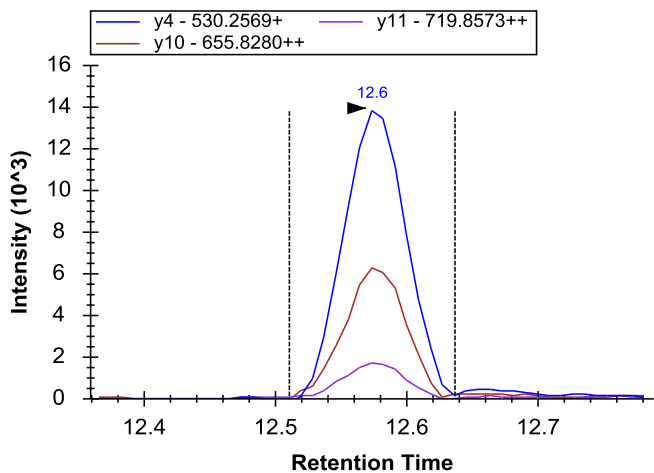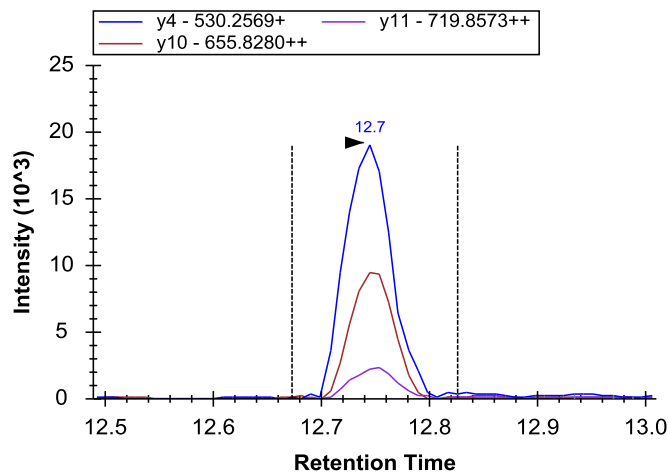



SAIC-31A, SNCG, TVEEAENIAVTSGVVR.

H peptide transitions at 0.05 fmol/uL spike level; capture experiment 1 (left), capture experiment 2 (right). The assay's grade (grade A) was given based on this spike level.

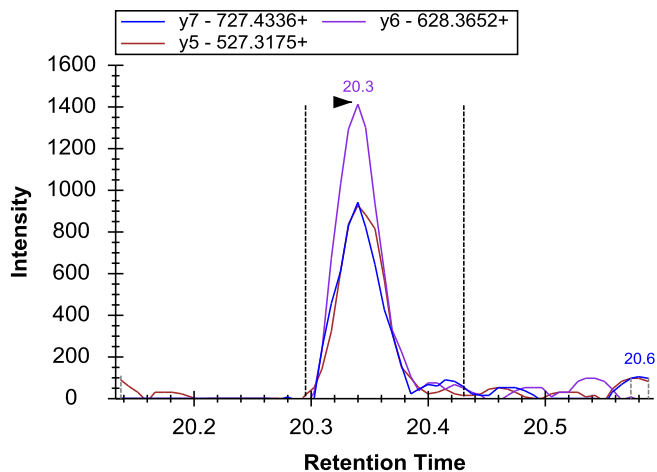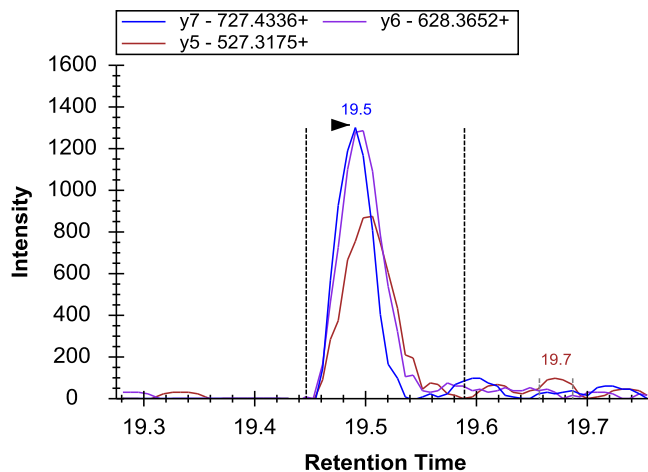

H peptide transitions at 0.5 fmol/uL spike level; capture experiment 1 (left), capture experiment 2 (right).

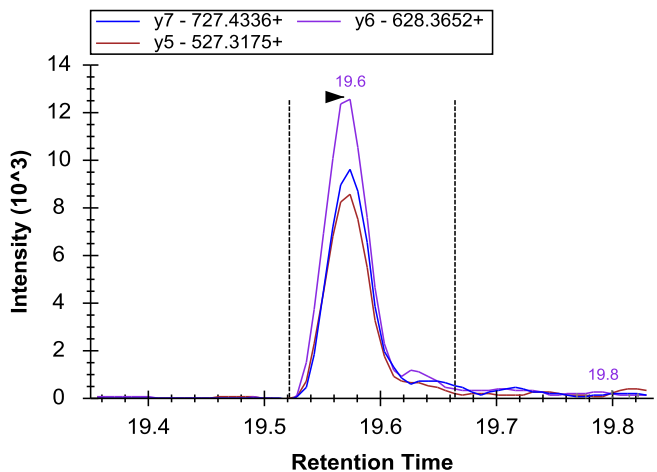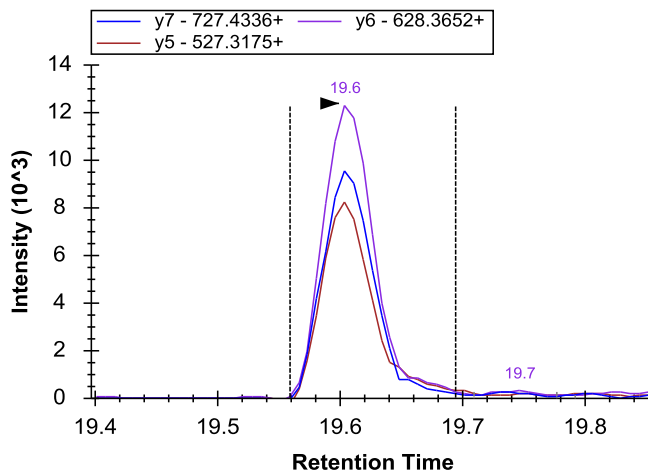

L peptide transitions, spiked at 10 fmol/uL; capture experiment 1 (left), capture experiment 2 (right).

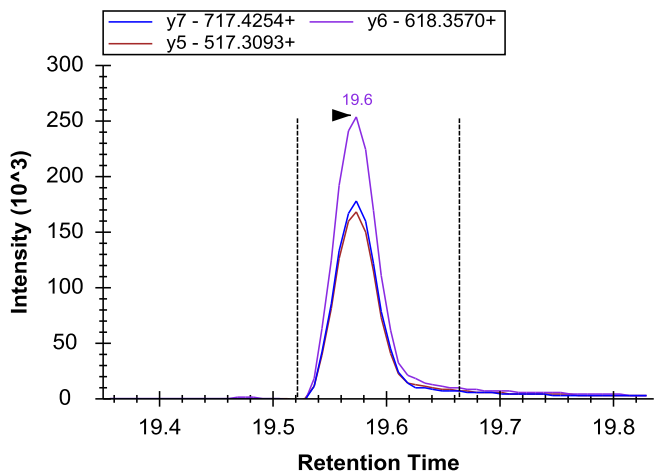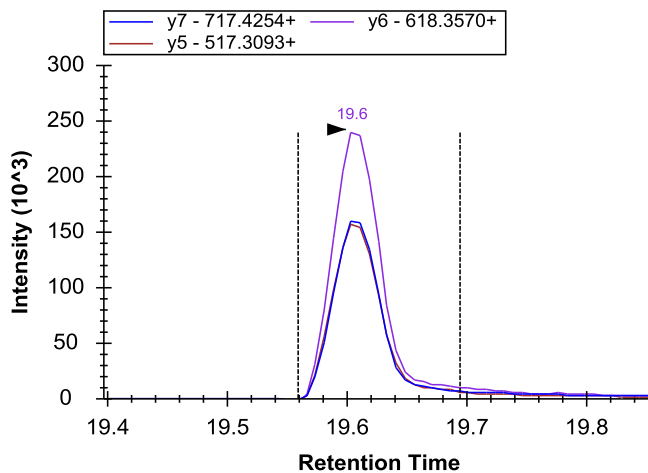

SAIC-32C, FSCN1, YLAPSGPSGLK.

H peptide transitions at 0.05 fmol/uL spike level; capture experiment 1 (left), capture experiment 2 (right). The assay's grade (grade A) was given based on this spike level.

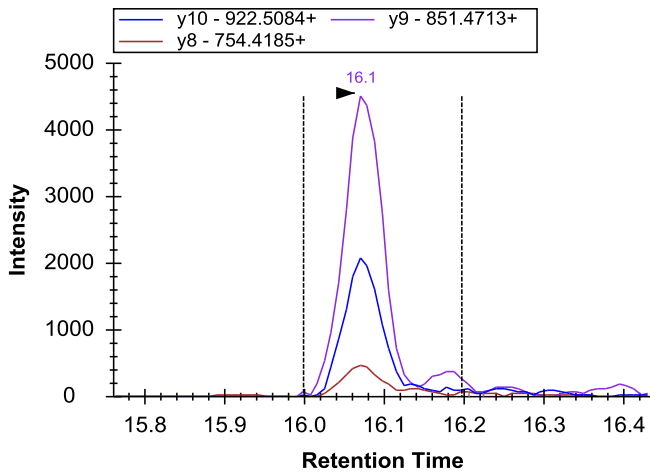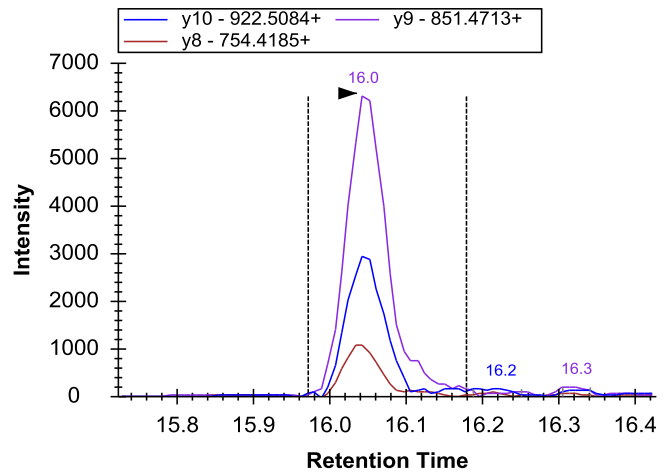

H peptide transitions at 0.5 fmol/uL spike level; capture experiment 1 (left), capture experiment 2 (right).

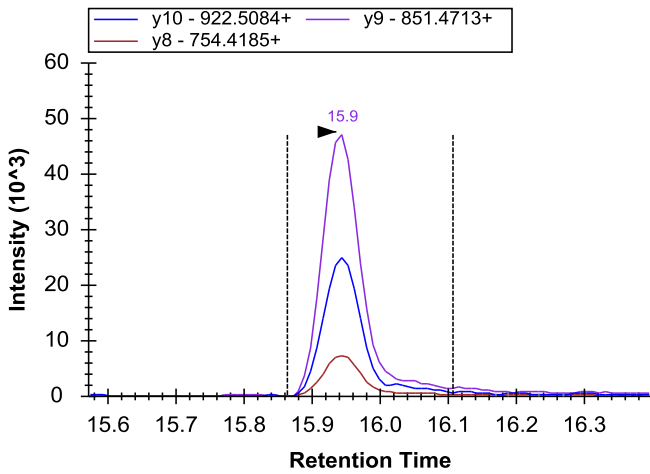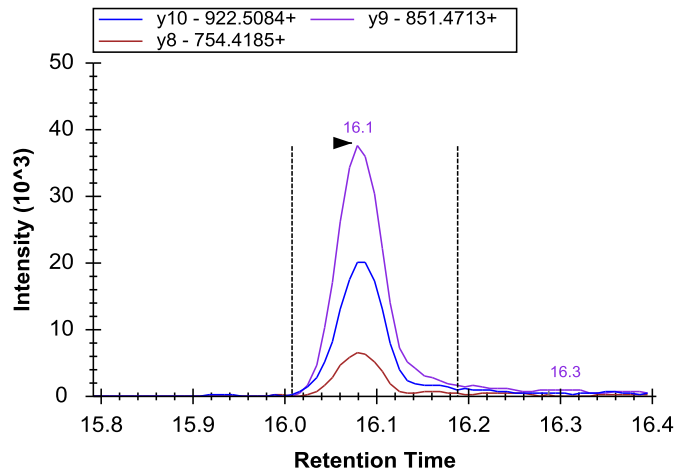

L peptide transitions, spiked at 10 fmol/uL; capture experiment 1 (left), capture experiment 2 (right).

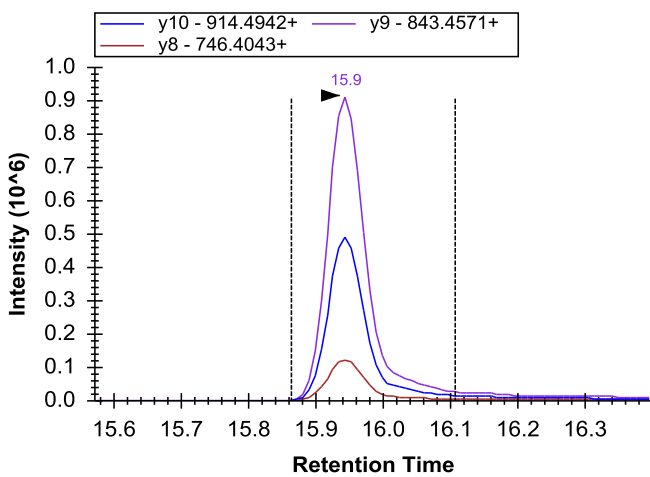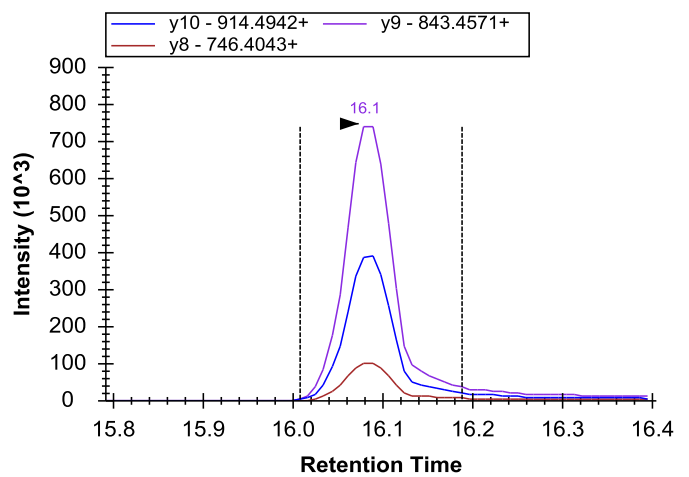

SAIC-33B, TAGLN, AAEDYGVK.

H peptide transitions at 0.05 fmol/uL spike level; capture experiment 1 (left), capture experiment 2 (right). The assay's grade (grade A) was given based on this spike level.

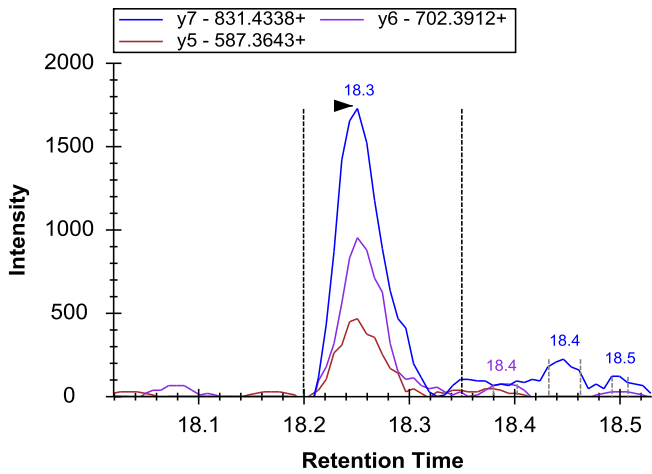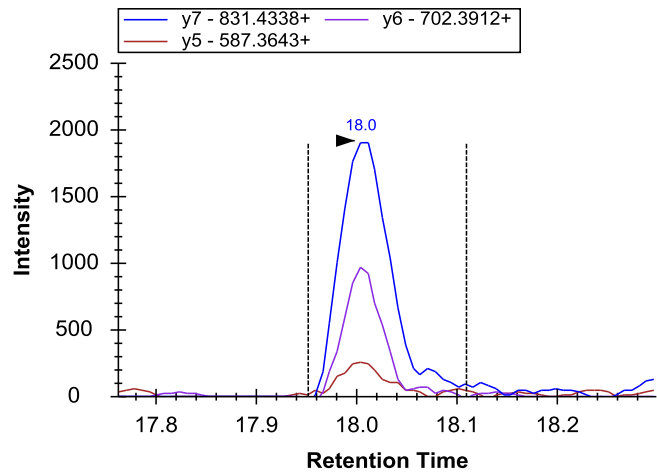

H peptide transitions at 0.5 fmol/uL spike level; capture experiment 1 (left), capture experiment 2 (right).

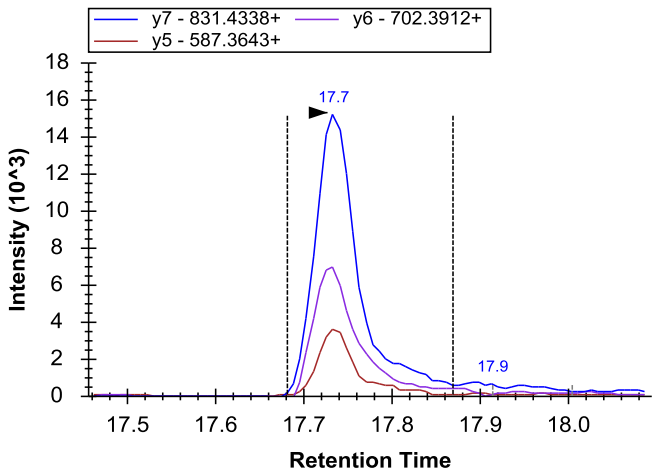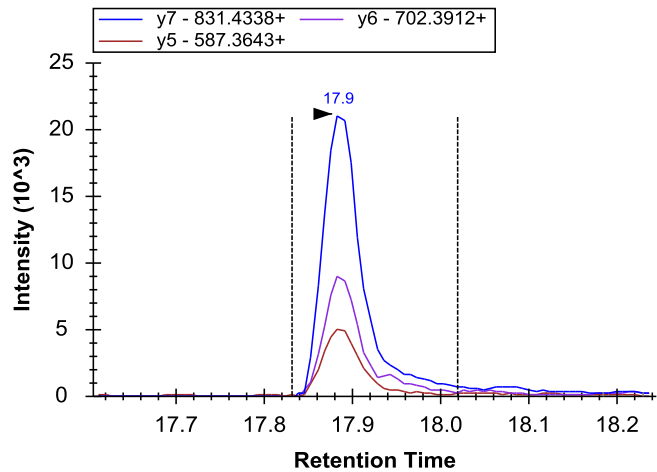

L peptide transitions, spiked at 10 fmol/uL; capture experiment 1 (left), capture experiment 2 (right).

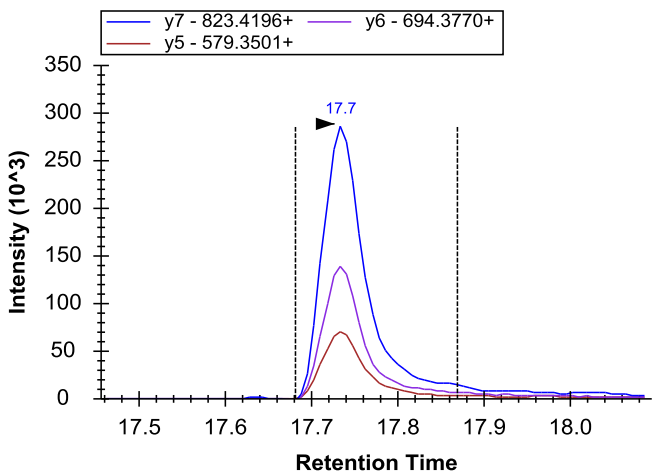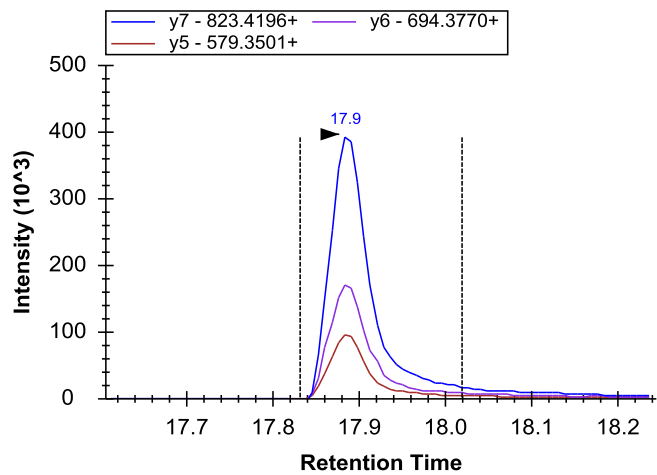

SAIC-34A, PRDX2, ATAVVDGAFK.

H peptide transitions at 5 fmol/uL spike level; capture experiment 1 (left), capture experiment 2 (right).

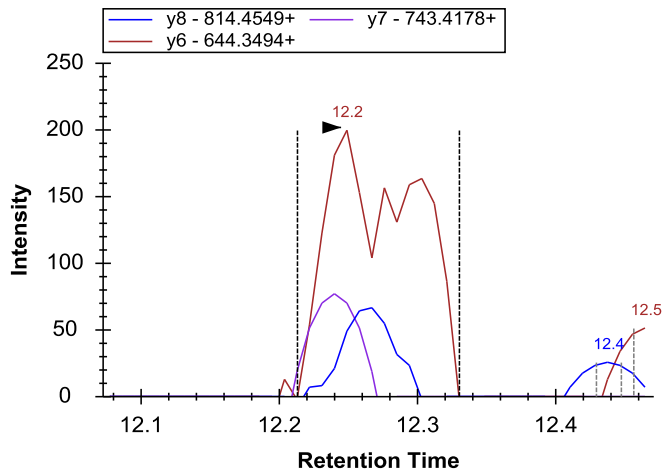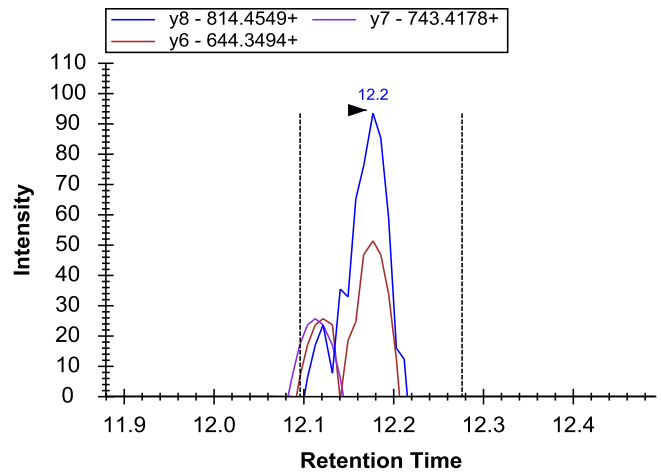

L peptide transitions, spiked at 10 fmol/uL; capture experiment 1 (left), capture experiment 2 (right). The assay's grade (grade D) was given based on this spike level.

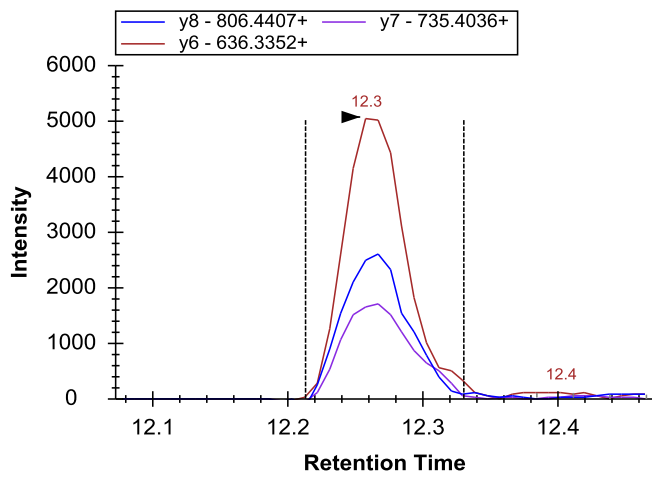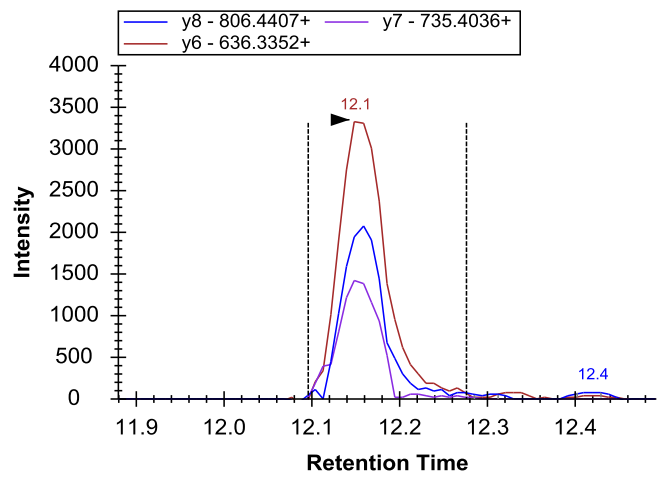

SAIC-34B, PRDX2, LSEDYGVLK.

H peptide transitions at 0.05 fmol/uL spike level; capture experiment 1 (left), capture experiment 2 (right). The assay's grade (grade A-B) was given based on this and the next (0.5 fmol/uL) spike level.

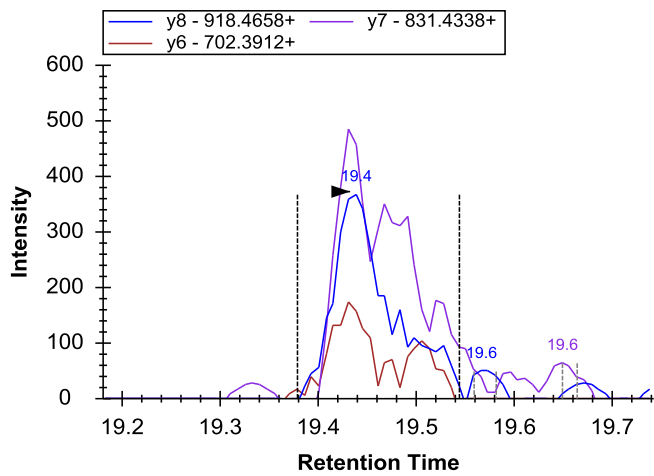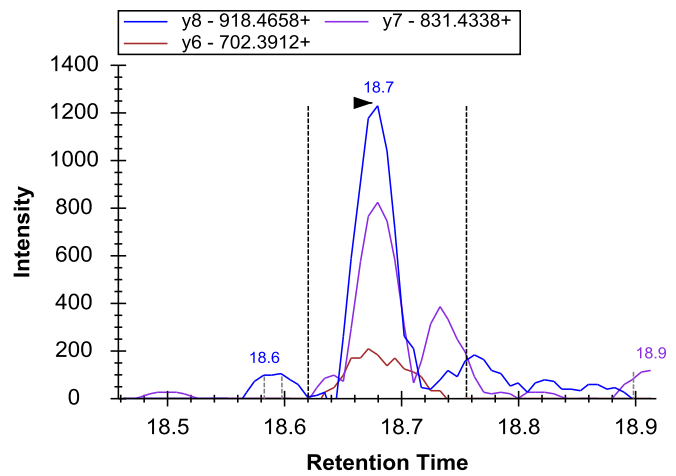

H peptide transitions at 0.5 fmol/uL spike level; capture experiment 1 (left), capture experiment 2 (right).

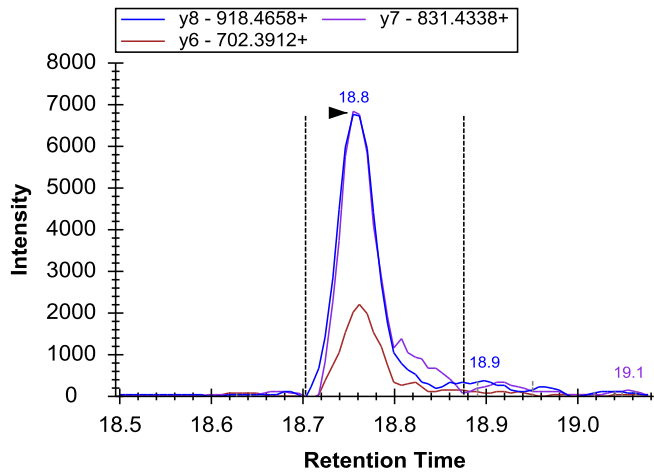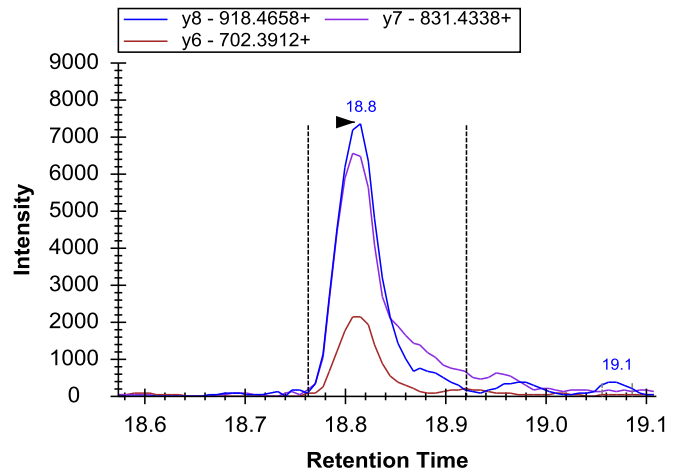

L peptide transitions, spiked at 10 fmol/uL; capture experiment 1 (left), capture experiment 2 (right).

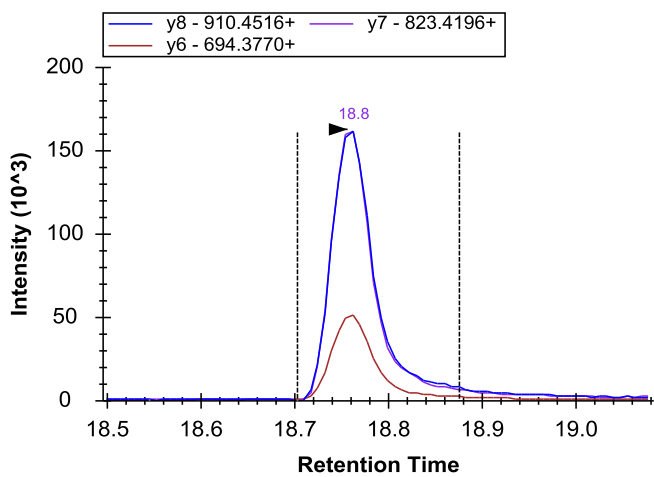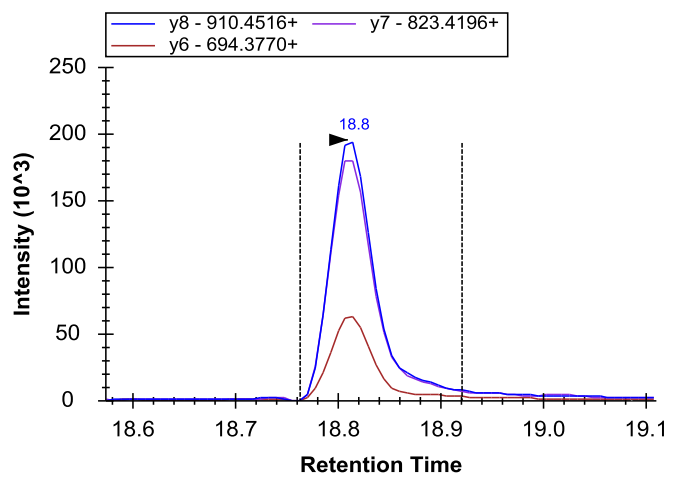

SAIC-34D, PRDX2, GLFIIDGK.

H peptide transitions at 0.5 fmol/uL spike level; capture experiment 1 (left), capture experiment 2 (right). The assay's grade (grade B) was given based on this spike level.

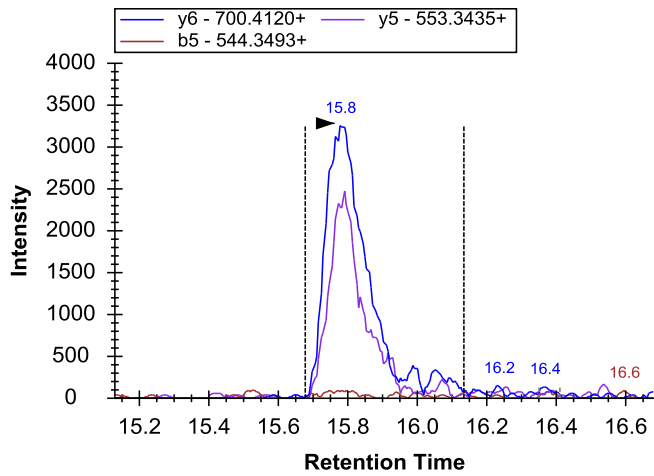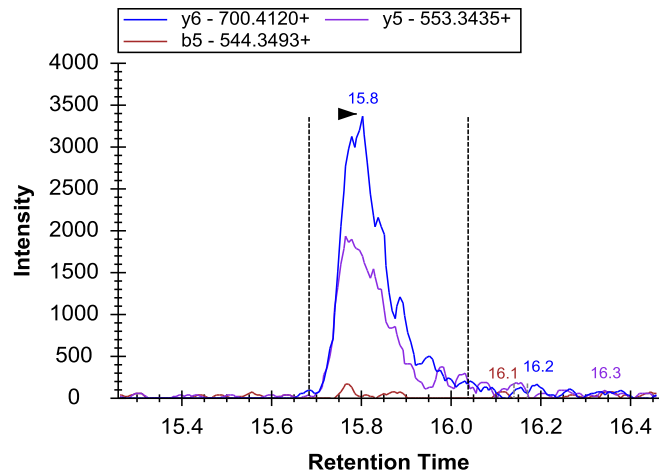

H peptide transitions at 5 fmol/uL spike level; capture experiment 1 (left), capture experiment 2 (right).

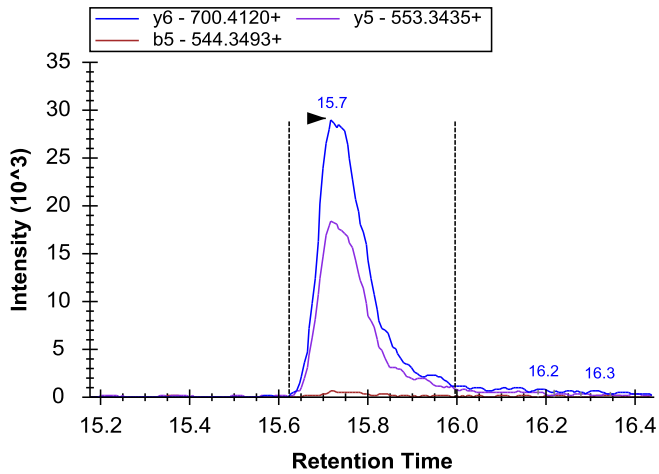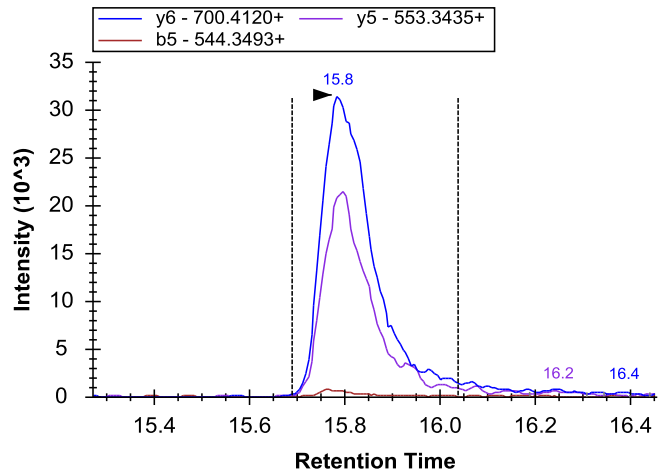

L peptide transitions, spiked at 10 fmol/uL; capture experiment 1 (left), capture experiment 2 right).

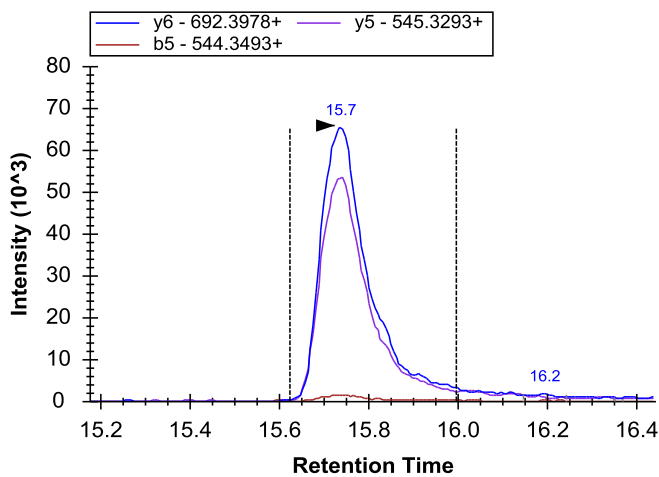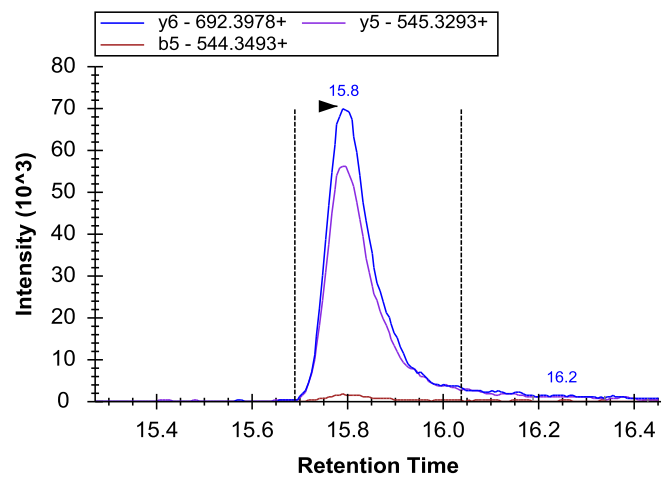

SAIC-36A, UBE2I, DHPFGFVAVPTK.

H peptide transitions at 0.05 fmol/uL spike level; capture experiment 1 (left), capture experiment 2 (right). The assay's grade (grade A-B) was given based on this and the next (0.5 fmol/uL) spike level.

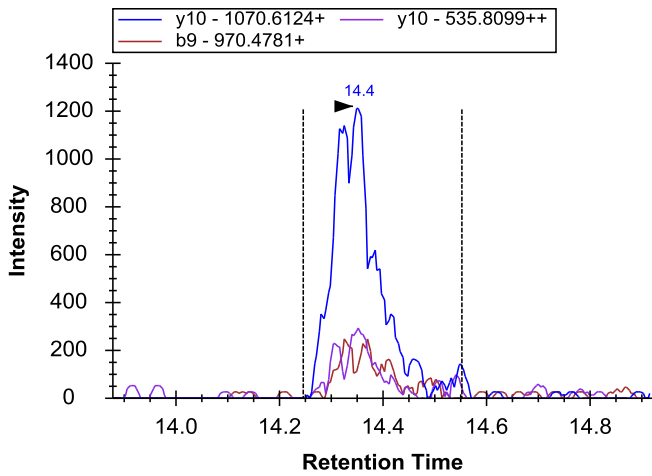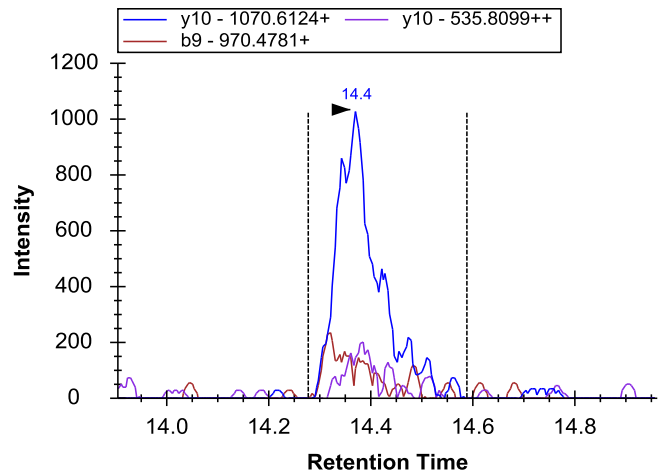

H peptide transitions at 0.5 fmol/uL spike level; capture experiment 1 (left), capture experiment 2 (right).

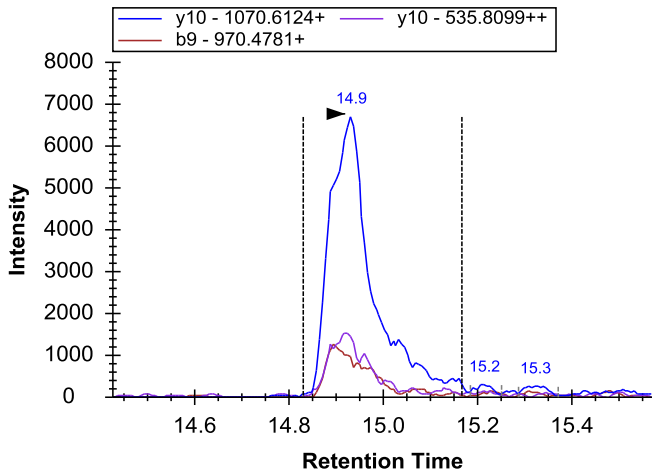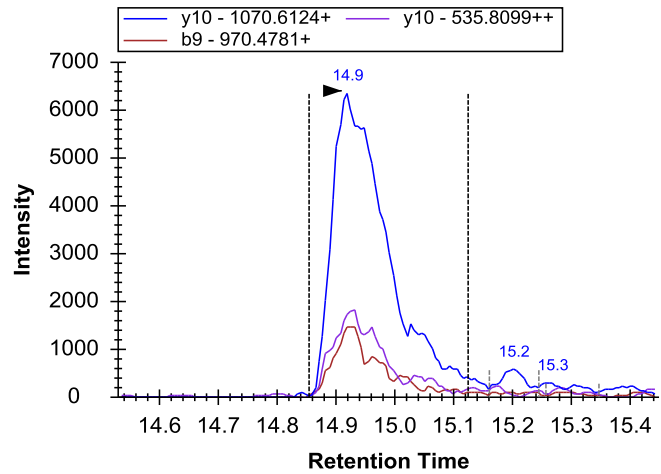

L peptide transitions, spiked at 10 fmol/uL; capture experiment 1 (left), capture experiment 2 (right).

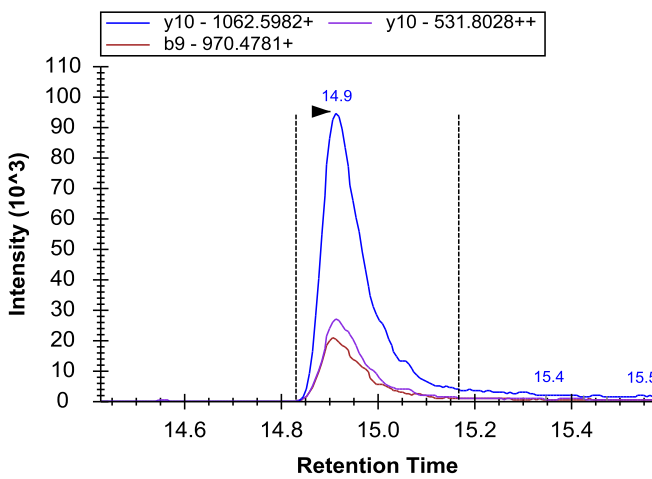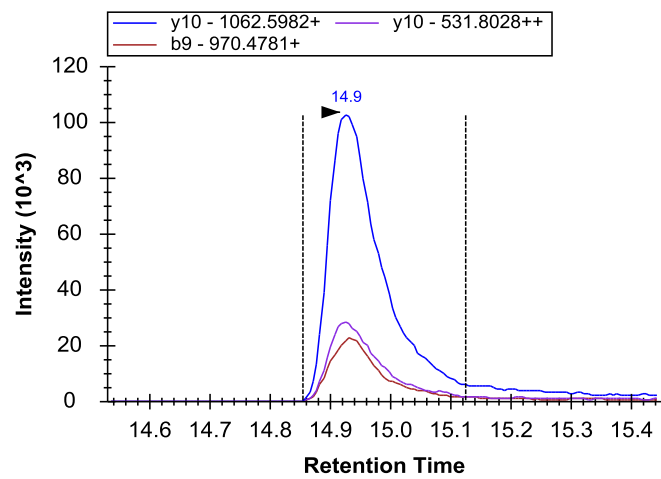

SAIC-36C, UBE2I, GTPWEGGLFK.

H peptide transitions at 0.5 fmol/uL spike level; capture experiment 1 (left), capture experiment 2 (right).

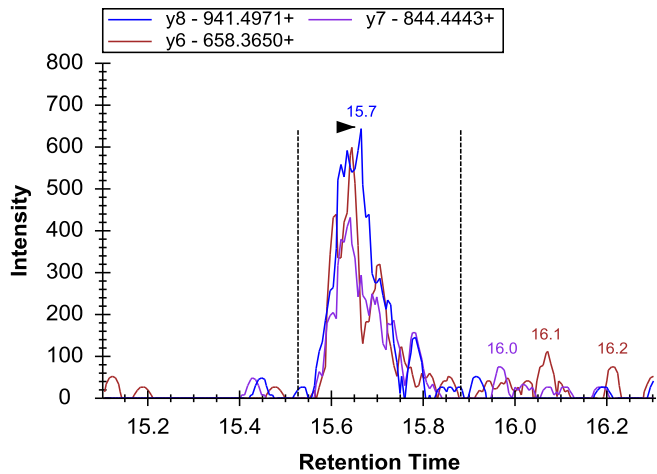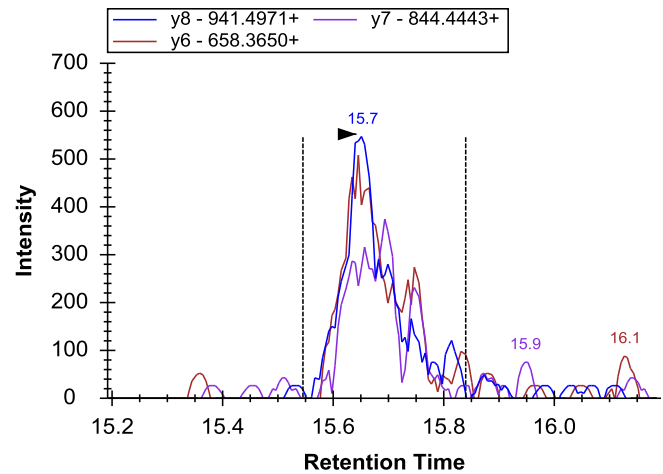

H peptide transitions at 5 fmol/uL spike level; capture experiment 1 (left), capture experiment 2 (right). The assay's grade (grade C) was given based on this spike level.

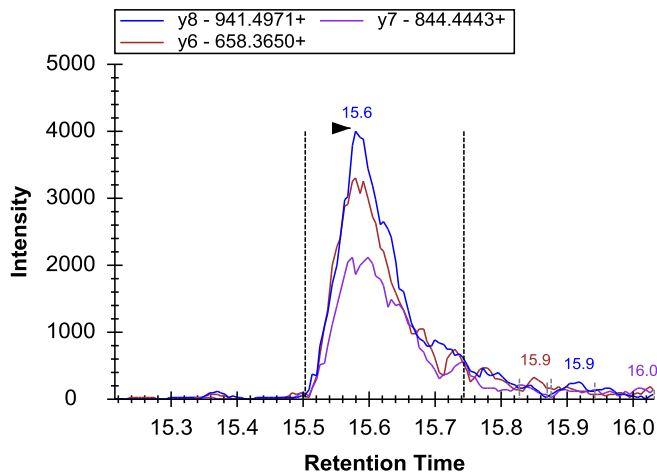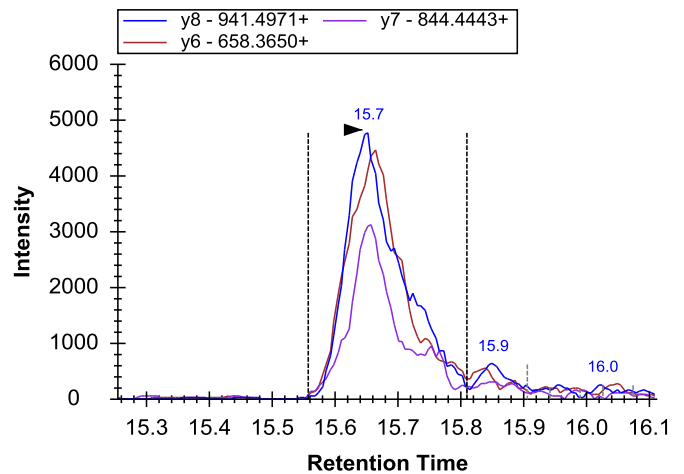

L peptide transitions, spiked at 10 fmol/uL; capture experiment 1 (left), capture experiment 2 (right).

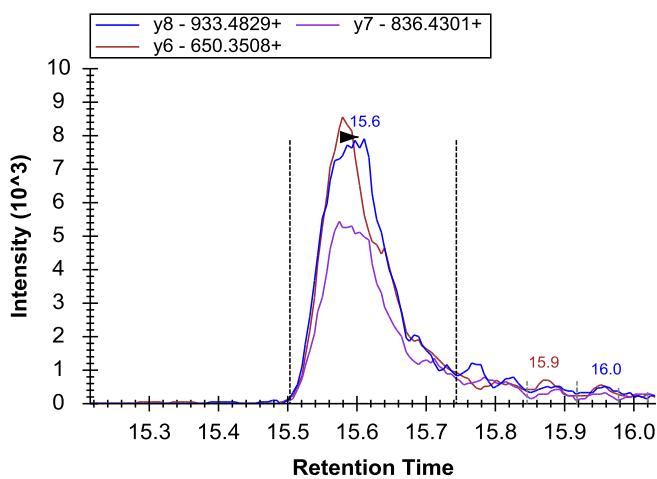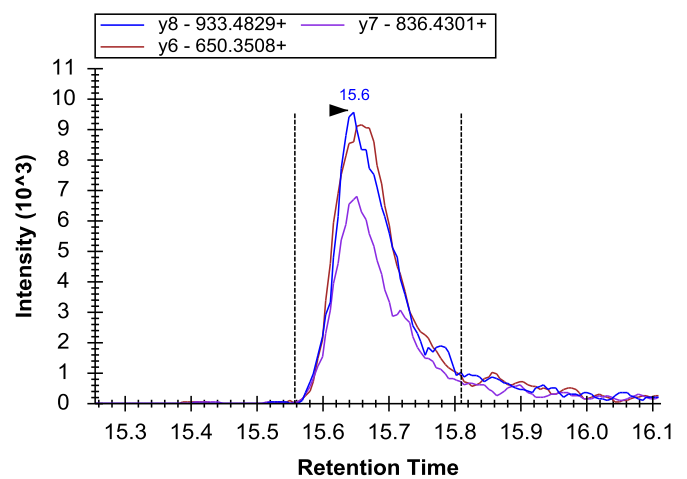



SAIC-37C, EZR, SGYLSSER.

H peptide transitions at 0.05 fmol/uL spike level; capture experiment 1 (left), capture experiment 2 (right).

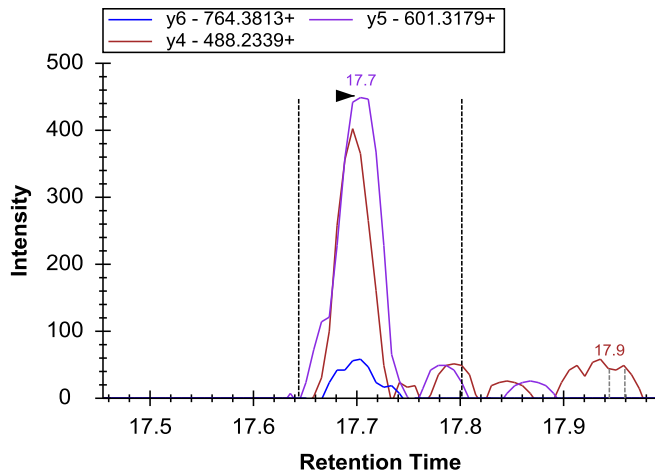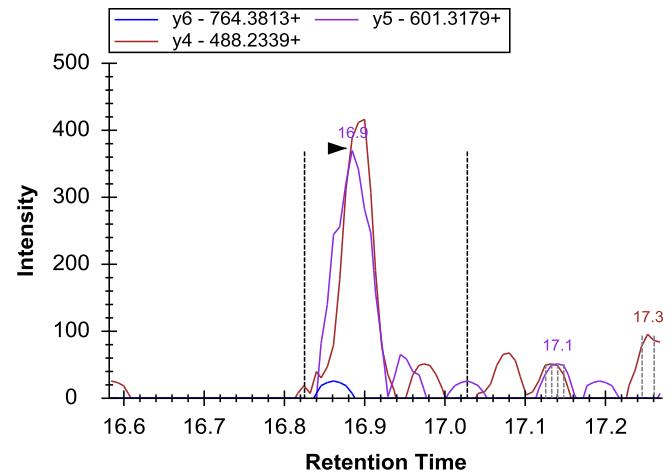

H peptide transitions at 0.5 fmol/uL spike level; capture experiment 1 (left), capture experiment 2 (right). The assay's grade (grade B) was given based on this spike level.

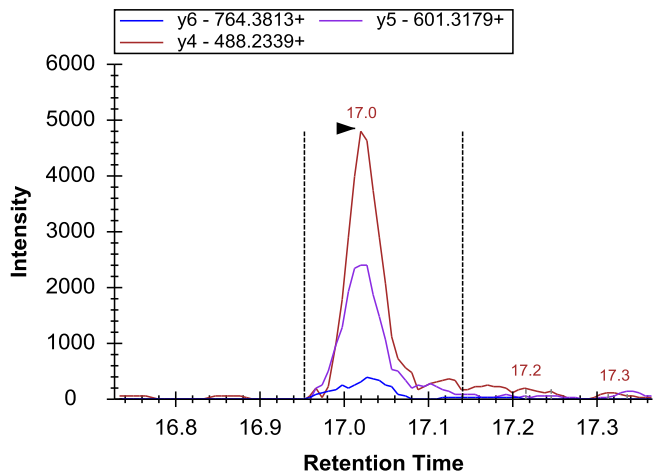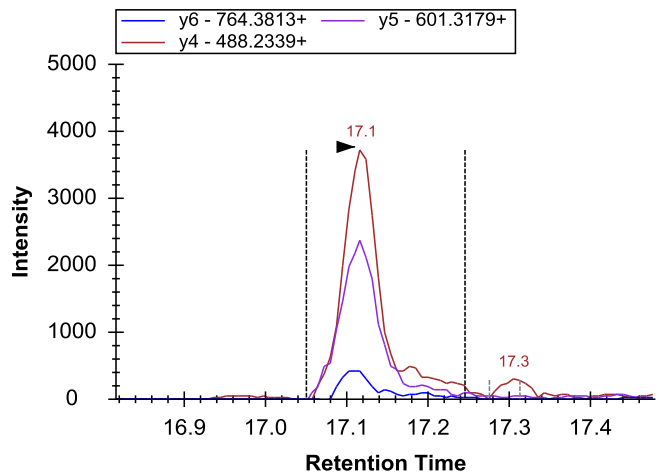

L peptide transitions, spiked at 10 fmol/uL; capture experiment 1 (left), capture experiment 2 (right).

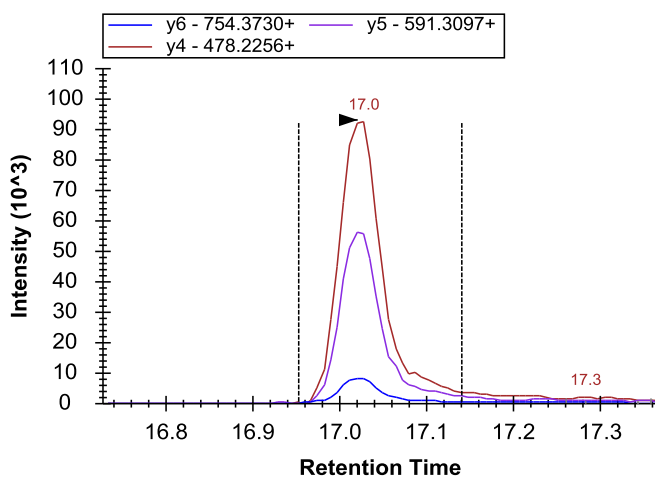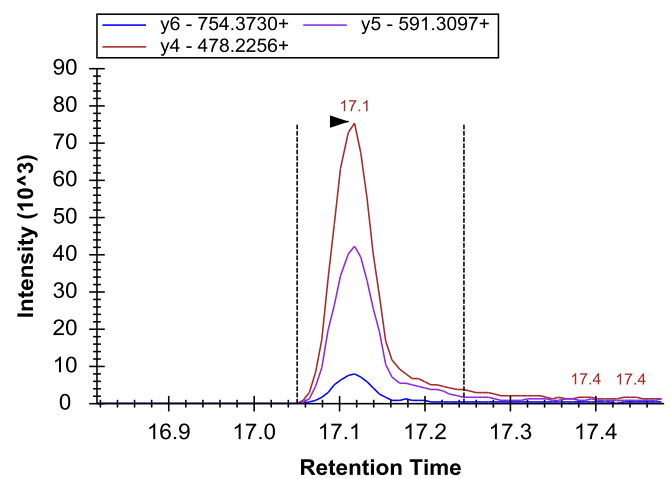

SAIC-40A, PRDX4, QITLNDLPVGR.

H peptide transitions at 0.05 fmol/uL spike level; capture experiment 1 (left), capture experiment 2 (right). The assay's grade (grade A-B) was given based on this and the next (0.5 fmol/uL) spike level.

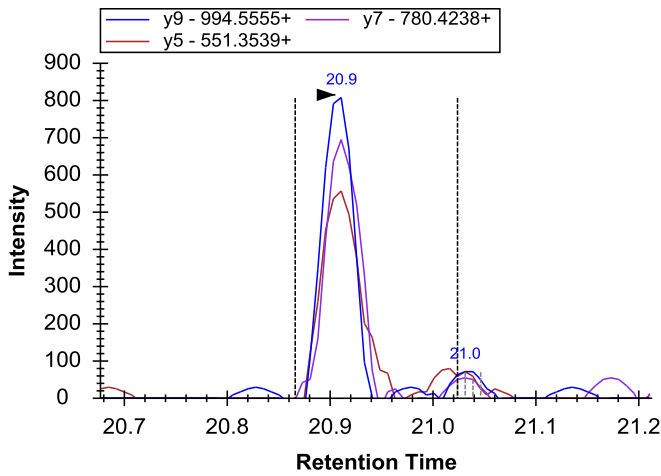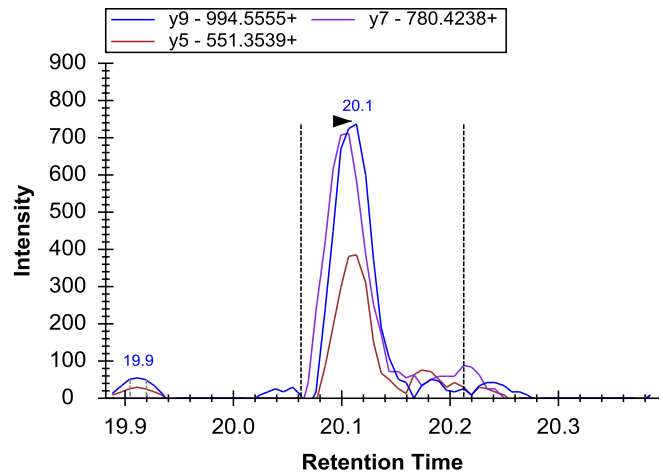

H peptide transitions at 0.5 fmol/uL spike level; capture experiment 1 (left), capture experiment 2 (right).

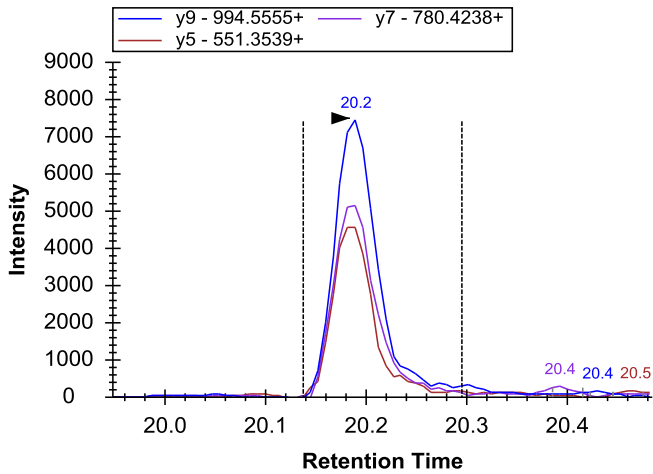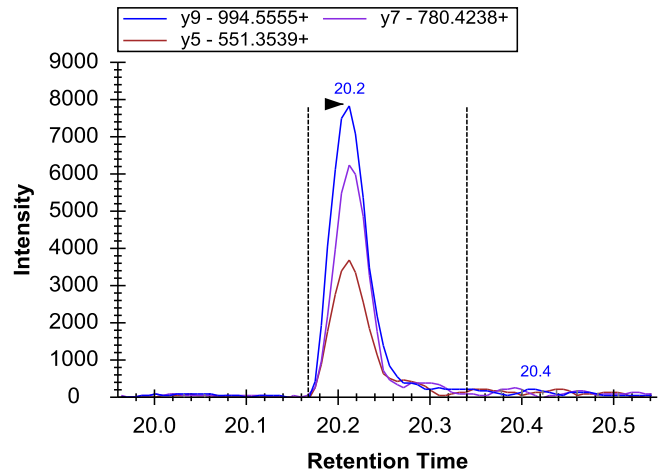

L peptide transitions, spiked at 10 fmol/uL; capture experiment 1 (left), capture experiment 2 (right).

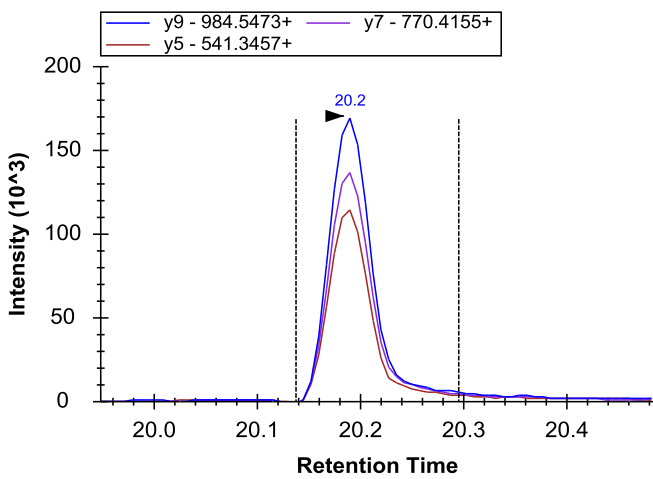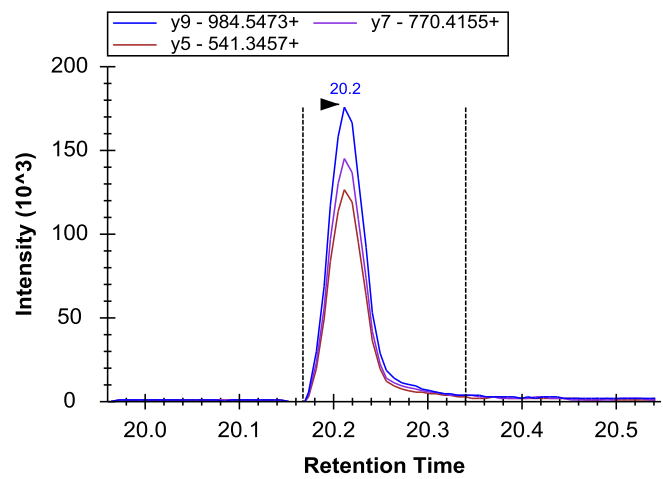

SAIC-40C, PRDX4, LVQAFQYTDK.

H peptide transitions at 0.05 fmol/uL spike level; capture experiment 1 (left), capture experiment 2 (right). The assay's grade (grade A-B) was given based on this and the next (0.5 fmol/uL) spike level.

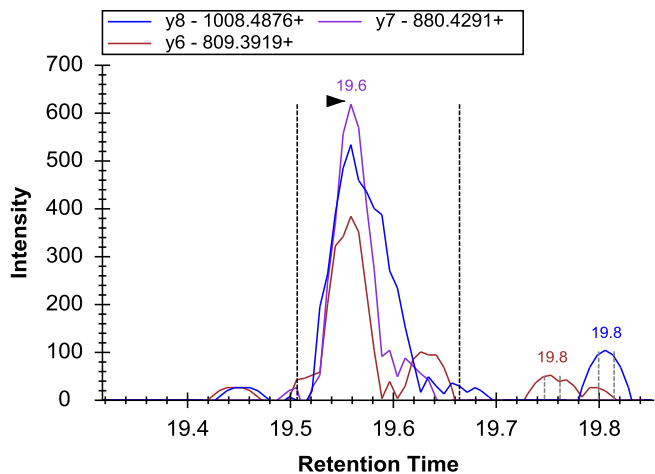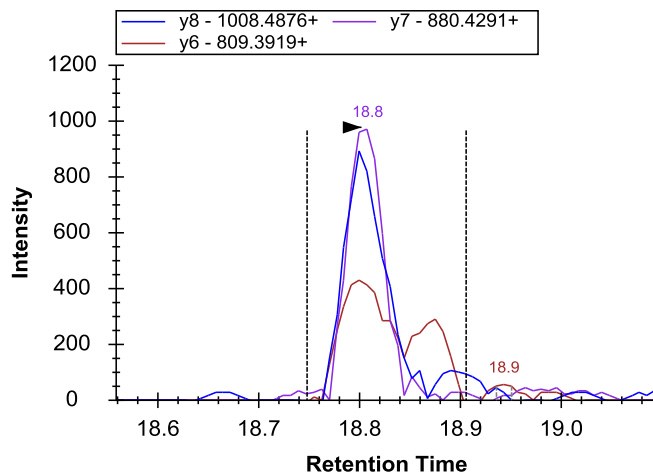

H peptide transitions at 0.5 fmol/uL spike level; capture experiment 1 (left), capture experiment 2 (right).

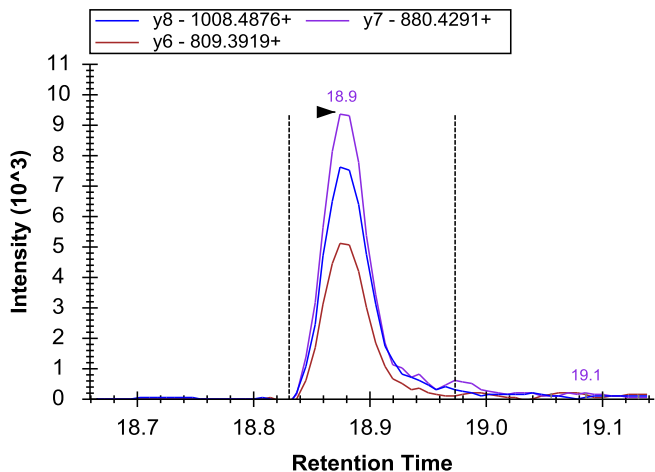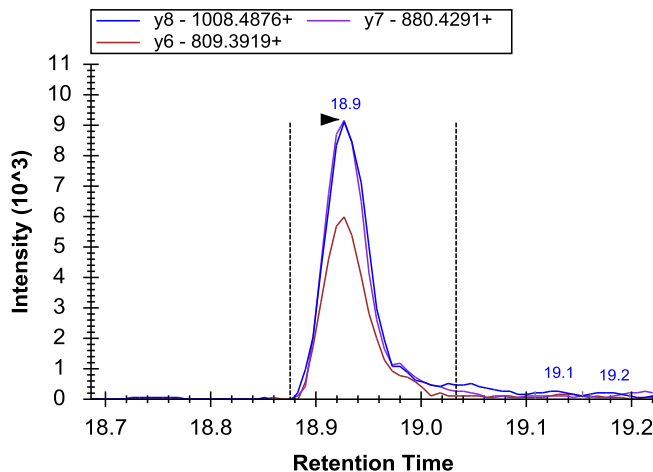

L peptide transitions, spiked at 10 fmol/uL; capture experiment 1 (left), capture experiment 2 (right).

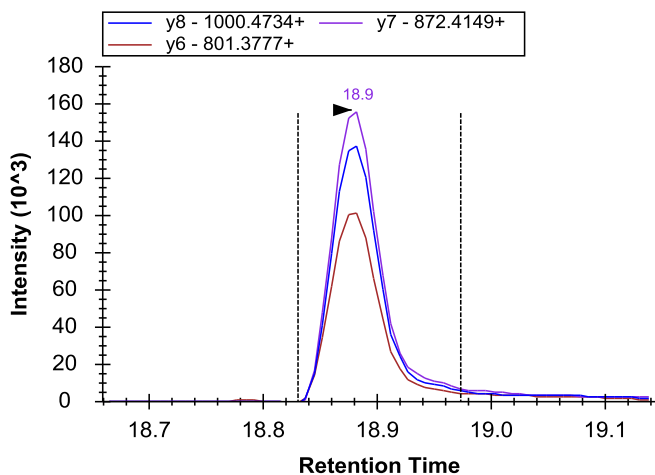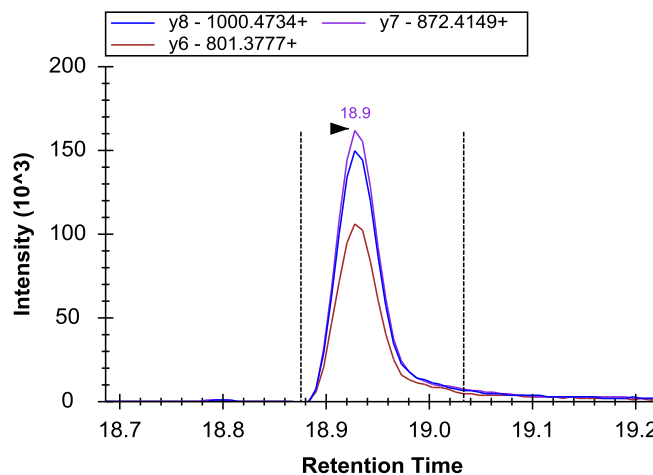

SAIC-41A, UBE2C, GISAFPESDNLFK.

H peptide transitions at 0.05 fmol/uL spike level; capture experiment 1 (left), capture experiment 2 (right). The assay's grade (grade A-B) was given based on this and the next (0.5 fmol/uL) spike level.

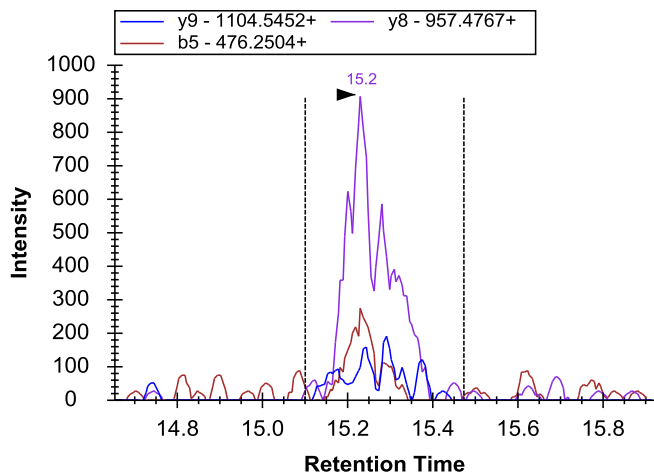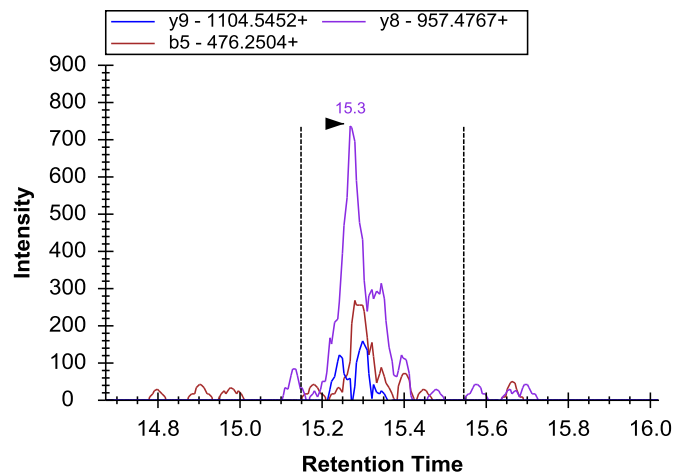

H peptide transitions at 0.5 fmol/uL spike level; capture experiment 1 (left), capture experiment 2 (right).

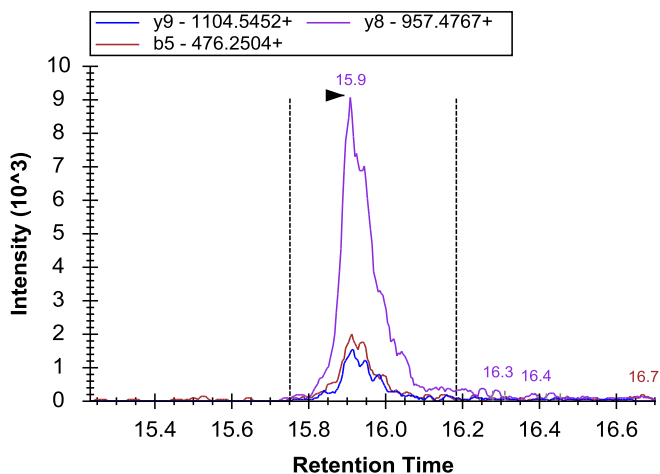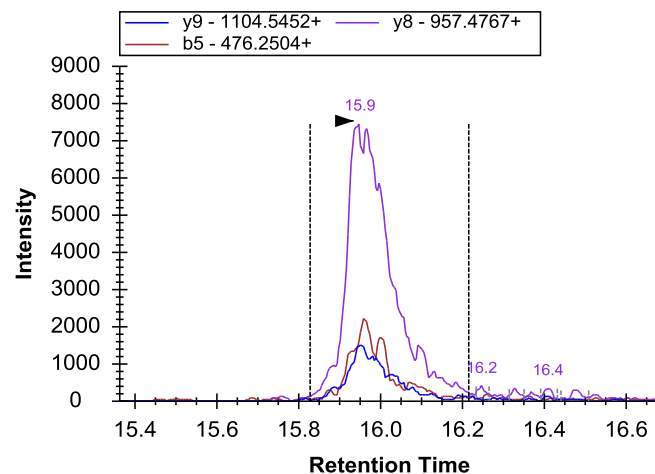

L peptide transitions, spiked at 10 fmol/uL; capture experiment 1 (left), capture experiment 2 (right).

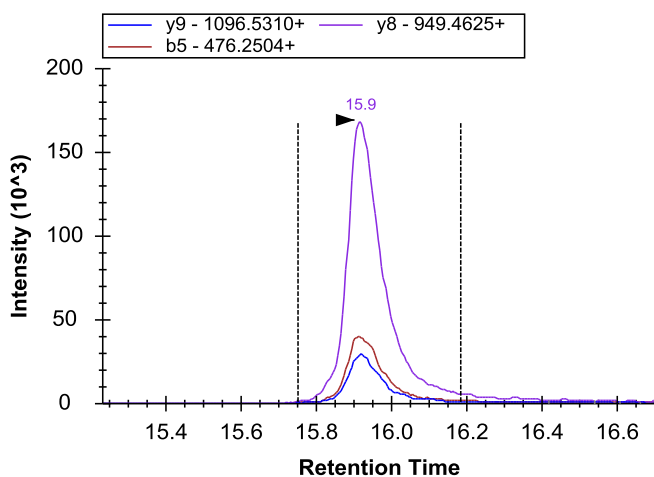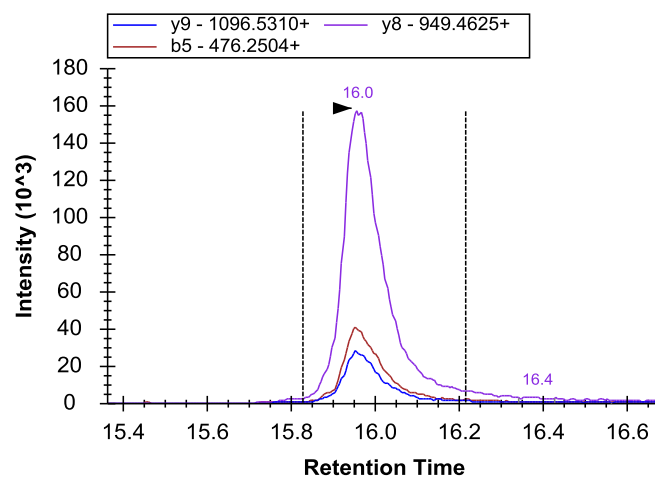

SAIC-41C, UBE2C, LSLEFPSGYYPNAPTVK.

H peptide transitions at 0.5 fmol/uL spike level; capture experiment 1 (left), capture experiment 2 (right). The assay's grade (grade B) was given based on this spike level.

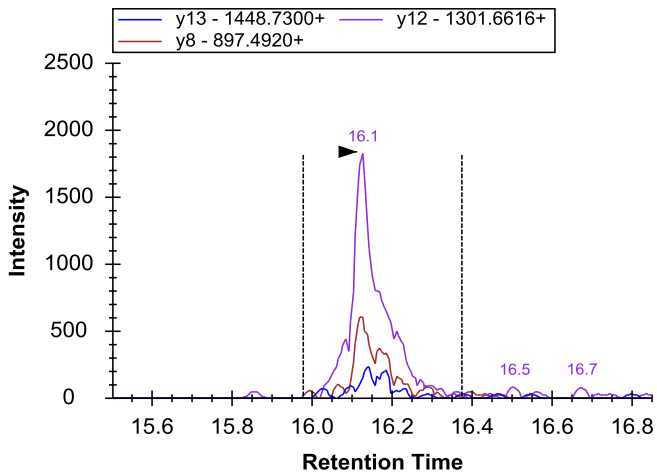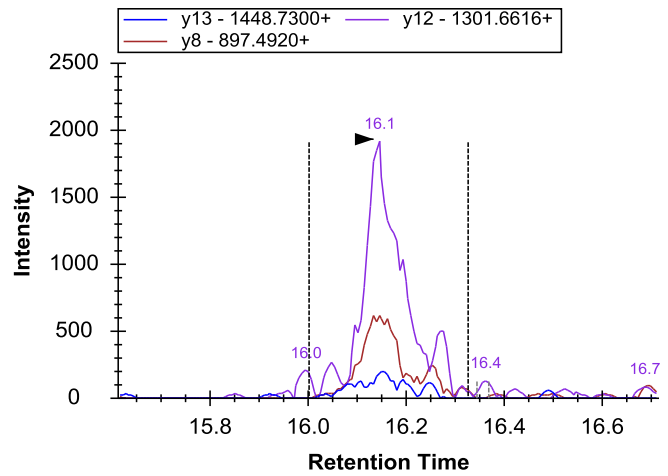

H peptide transitions at 5 fmol/uL spike level; capture experiment 1 (left), capture experiment 2 (right).

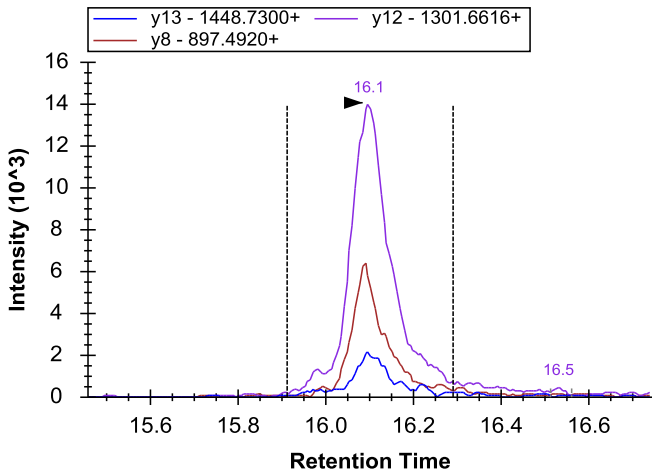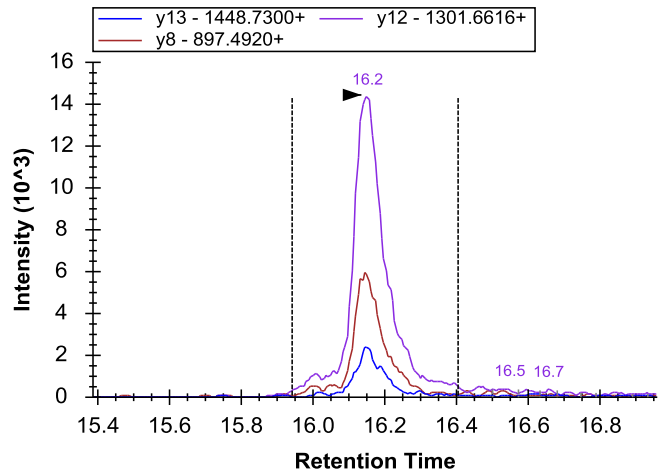

L peptide transitions, spiked at 10 fmol/uL; capture experiment 1 (left), capture experiment 2 (right).

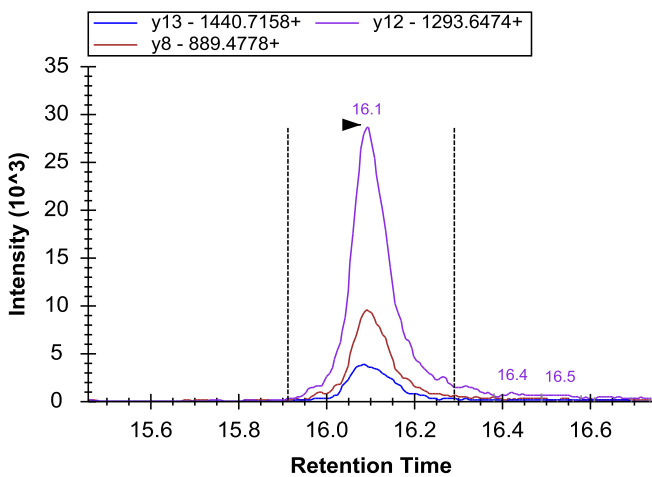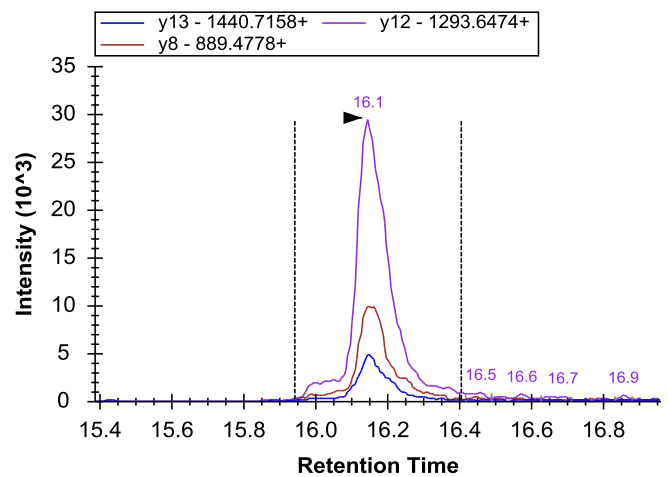

SAIC-42B, SERPINA6, AQLLQGLGFNLTER.

H peptide transitions at 0.05 fmol/uL spike level; capture experiment 1 (left), capture experiment 2 (right).

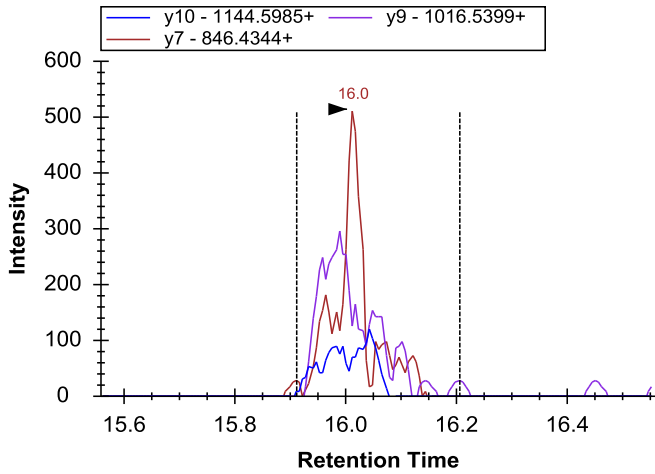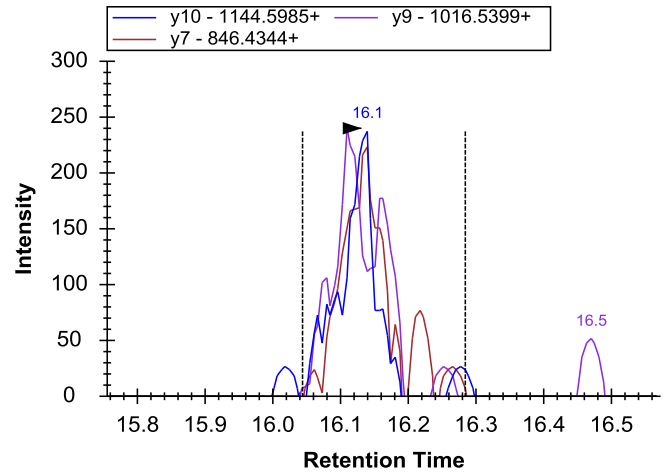

H peptide transitions at 0.5 fmol/uL spike level; capture experiment 1 (left), capture experiment 2 (right). The assay's grade (grade B) was given based on this spike level.

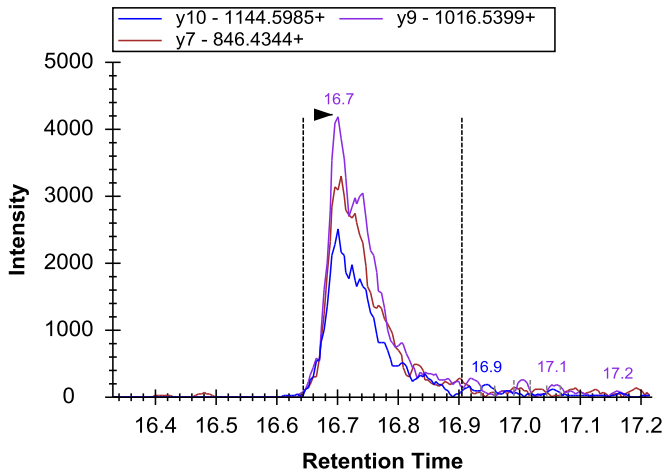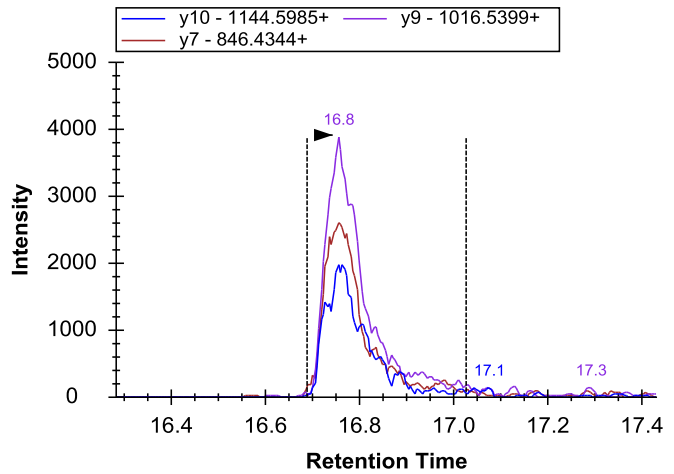

L peptide transitions, spiked at 10 fmol/uL; capture experiment 1 (left), capture experiment 2 (right).

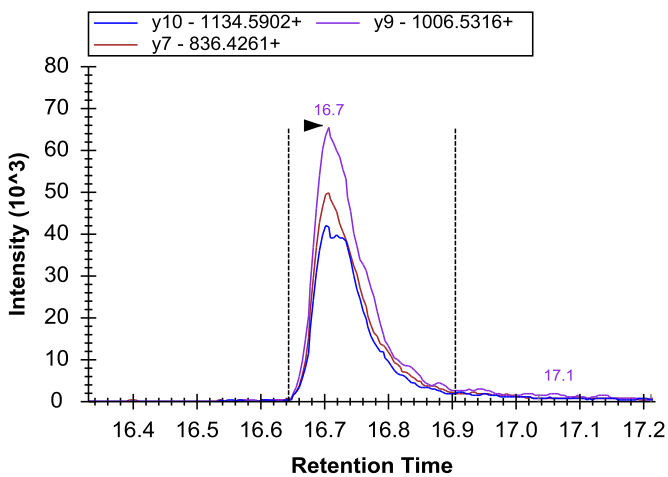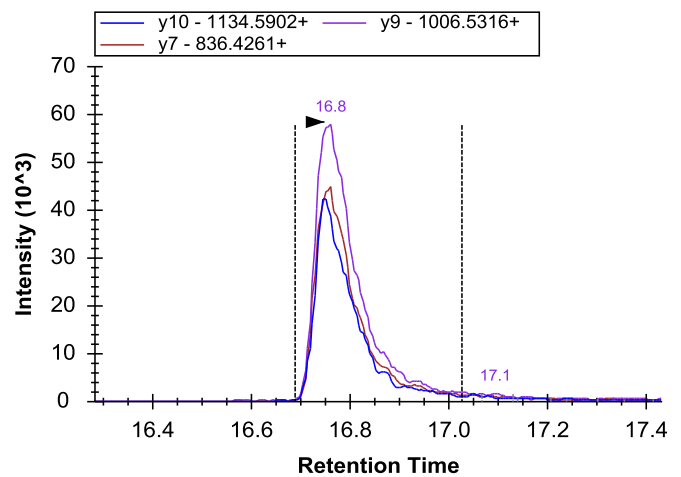

SAIC-43B, CLU, ASSIIDELFQDR.

H peptide transitions at 0.05 fmol/uL spike level; capture experiment 1 (left), capture experiment 2 (right).

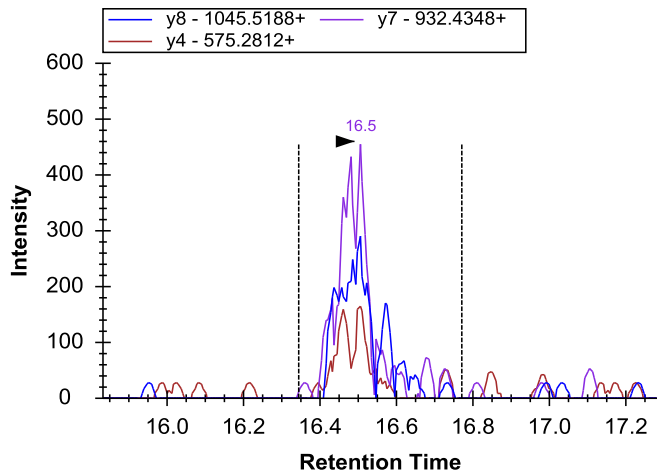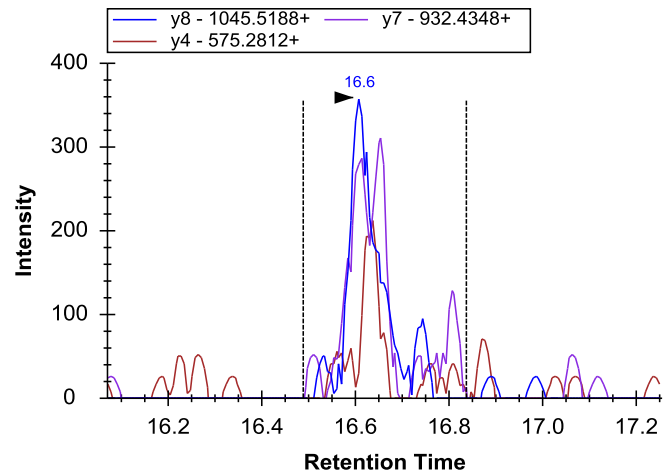

H peptide transitions at 0.5 fmol/uL spike level; capture experiment 1 (left), capture experiment 2 (right). The assay's grade (grade B) was given based on this spike level.

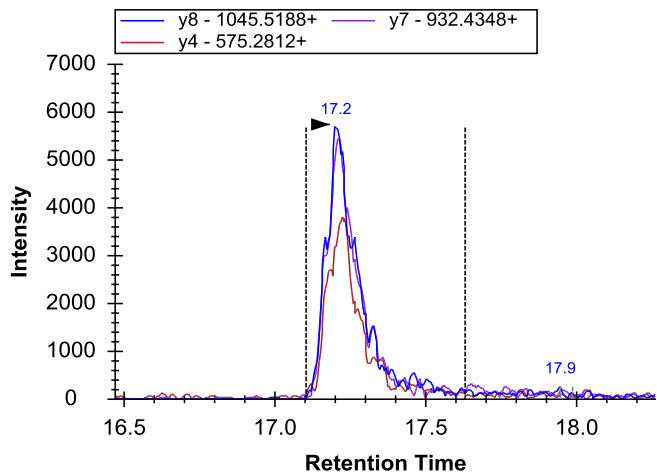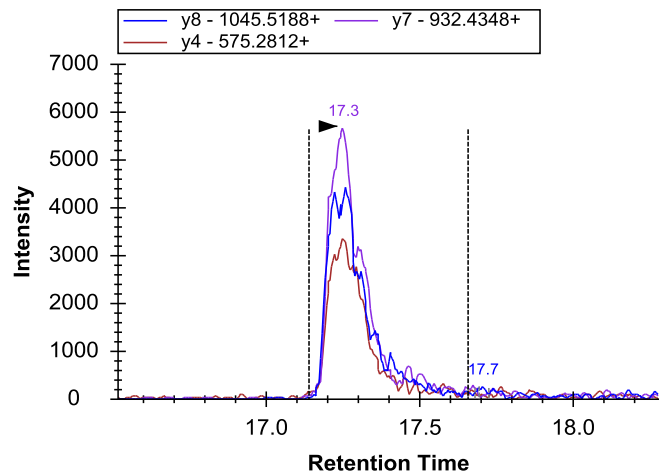

L peptide transitions, spiked at 10 fmol/uL; capture experiment 1 (left), capture experiment 2 (right).

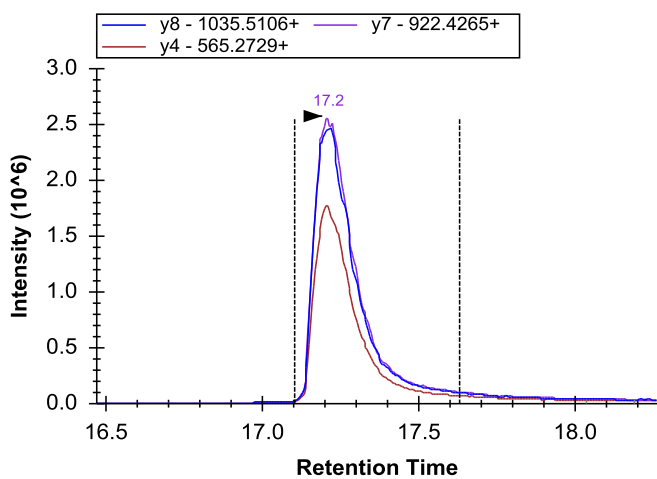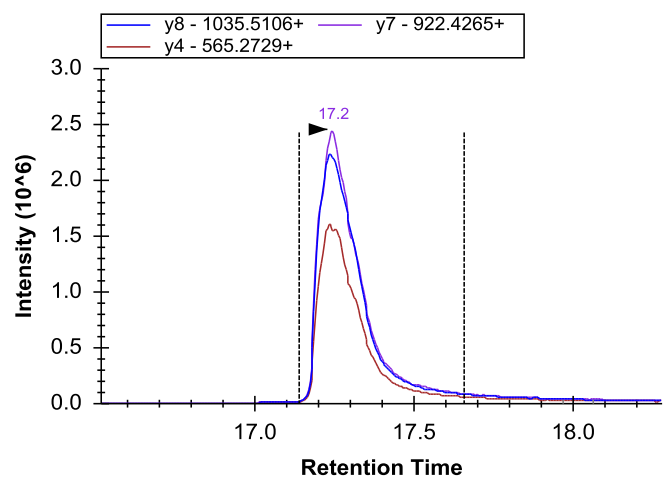

Supplement: supp_O114.043133_mcp.O114.043133-1.pdf [file supp_O114.043133_mcp.O114.043133-1.pdf]
