# Supplementary material
Source: PubMed Central journal article supplement (PMC4350033)

**Supplemental Figure 2. Immuno-MRM response curves plotted in linear and log space.** The heavy-to-light peak area ratios for the peptide's transitions are plotted vs. the heavy peptide's theoretical concentration. The abbreviations (e.g. 2.y6.1) refer to the precursor ion's charge state (+2), followed by the transition ion and the transition ion's charge state (+1); 2.SUM. refers to the response curve for which the peak areas of all transitions were summed before taking the peak area ratios; the error bars indicate the minimum and maximum (i.e., range) of the peak area ratios of the three capture and LC-MRM-MS replicates.

**Table of contents (giving the target peptide ID, the gene symbol, and the target peptide sequence):**

|                                          |    |
|------------------------------------------|----|
| SAIC-01B, CD44, TFIPVTSAK.....           | 3  |
| SAIC-02A, ERBB2, GLQSLPTHDPSPQLR.....    | 4  |
| SAIC-07B, XPNPEP1, GSLTFEPLTLVPIQTK..... | 5  |
| SAIC-07E, XPNPEP1, TSLDEVYLIDSGAQYK..... | 6  |
| SAIC-13B, ANXA1, AAYLQETGKPLDETLK.....   | 7  |
| SAIC-13C, ANXA1, GVDEATIIDILTK.....      | 8  |
| SAIC-14C, ANXA4, DEGNYLDDALVR.....       | 9  |
| SAIC-16D, CALR, GLQTSQDAR.....           | 10 |
| SAIC-19D, GRB2, FGNDVQHFK.....           | 11 |
| SAIC-21C, FEN1, SIEEIVR.....             | 12 |
| SAIC-22D, GSTP1, YISLIYTNYEAGK.....      | 13 |
| SAIC-23B, HSPB1, DGVVEITGK.....          | 14 |
| SAIC-23C, HSPB1, VSLDVNHFAPDELTVK.....   | 15 |
| SAIC-23E, HSPB1, LFDQAFGLPR.....         | 16 |
| SAIC-24B, IL18, ISTLSCENK.....           | 17 |
| SAIC-25B, LGALS1, SFVLNLGK.....          | 18 |
| SAIC-26C, NFKB2, IEVDLVTHSDPPR.....      | 19 |
| SAIC-27C, PCNA, LVQGSILK.....            | 20 |
| SAIC-28A, RAD23B, ILNDDTALK.....         | 21 |
| SAIC-28B, RAD23B, IDIDPEETVK.....        | 22 |
| SAIC-30C, RRM2, IEQEFLTEALPVK.....       | 23 |
| SAIC-30E, RRM2, DIQHWESLKPEER.....       | 24 |

|                                         |    |
|-----------------------------------------|----|
| SAIC-31A, SNCG, TVEEAENIAVTSGVVR.....   | 25 |
| SAIC-32C, FSCN1, YLAPSGPSGTLK.....      | 26 |
| SAIC-33B, TAGLN, AAEDYGVIK.....         | 27 |
| SAIC-34B, PRDX2, LSEDYGVLK.....         | 28 |
| SAIC-34D, PRDX2, GLFIIDGK.....          | 29 |
| SAIC-36A, UBE2I, DHPFGFVAVPTK.....      | 30 |
| SAIC-37C, EZR, SGYLSSER.....            | 31 |
| SAIC-40A, PRDX4, QITLNDLPVGR.....       | 32 |
| SAIC-40C, PRDX4, LVQAFQYTDK.....        | 33 |
| SAIC-41A, UBE2C, GISAFPESDNLFK.....     | 34 |
| SAIC-41C, UBE2C, LSLEFPSGYPYNAPTvk..... | 35 |
| SAIC-42B, SERPINA6, AQLLQGLGFNLTER..... | 36 |
| SAIC-43B, CLU, ASSIIDELFQDR.....        | 37 |
| SAIC-101A, TSHB, YALSQDVCTYR.....       | 38 |
| SAIC-101D, TSHB, SYLVGFSV.....          | 39 |
| SAIC-102A, CGB, VLQGVLPALPQVVCNYR.....  | 40 |
| SAIC-103A, MUC1, EGTINVHDVETQFNQYK..... | 41 |
| SAIC-103B, MUC1, NYGQLDIFPAR.....       | 42 |

### Analyte: SAIC01B.TFIPVTSAK

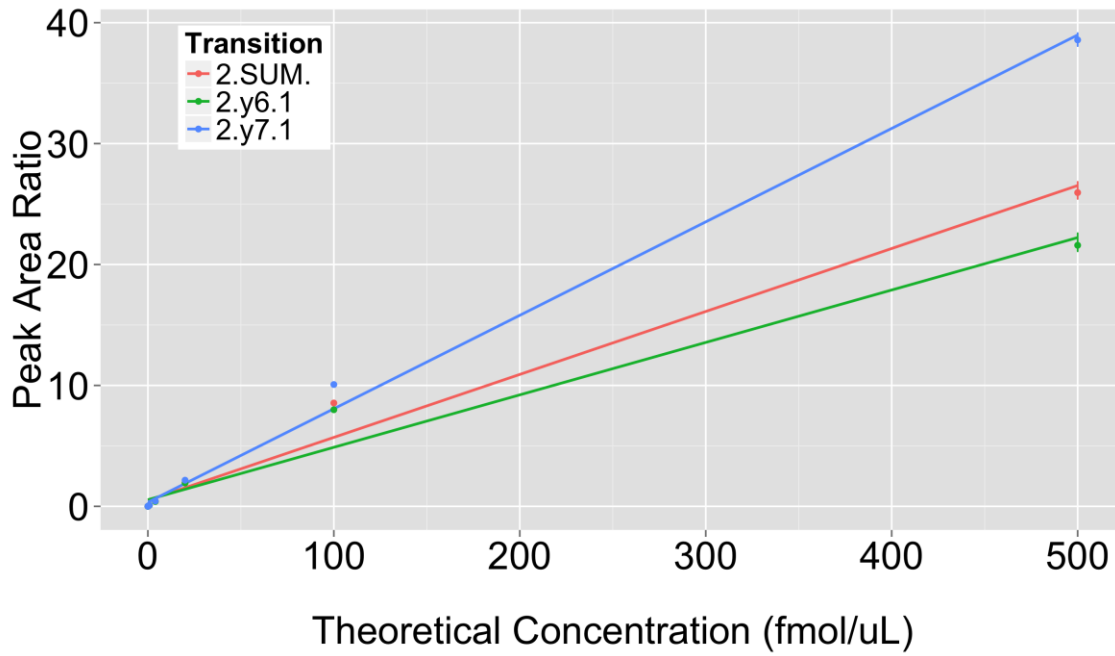

### Analyte: SAIC01B.TFIPVTSAK

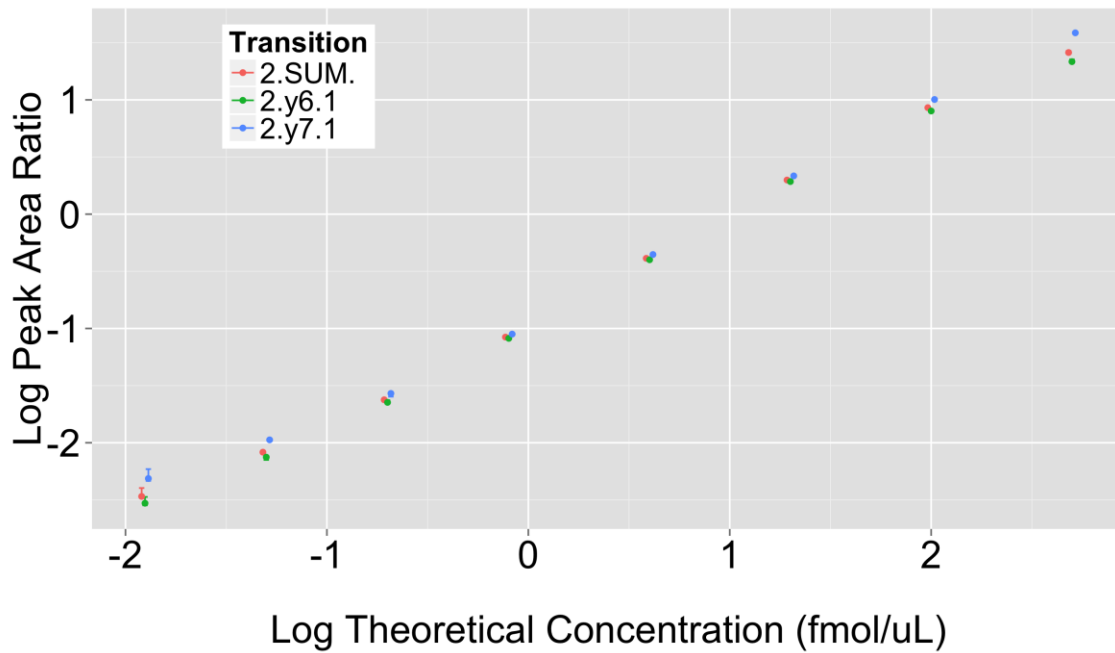

### Analyte: SAIC02A.GLQSLPTHDPSPQLQR

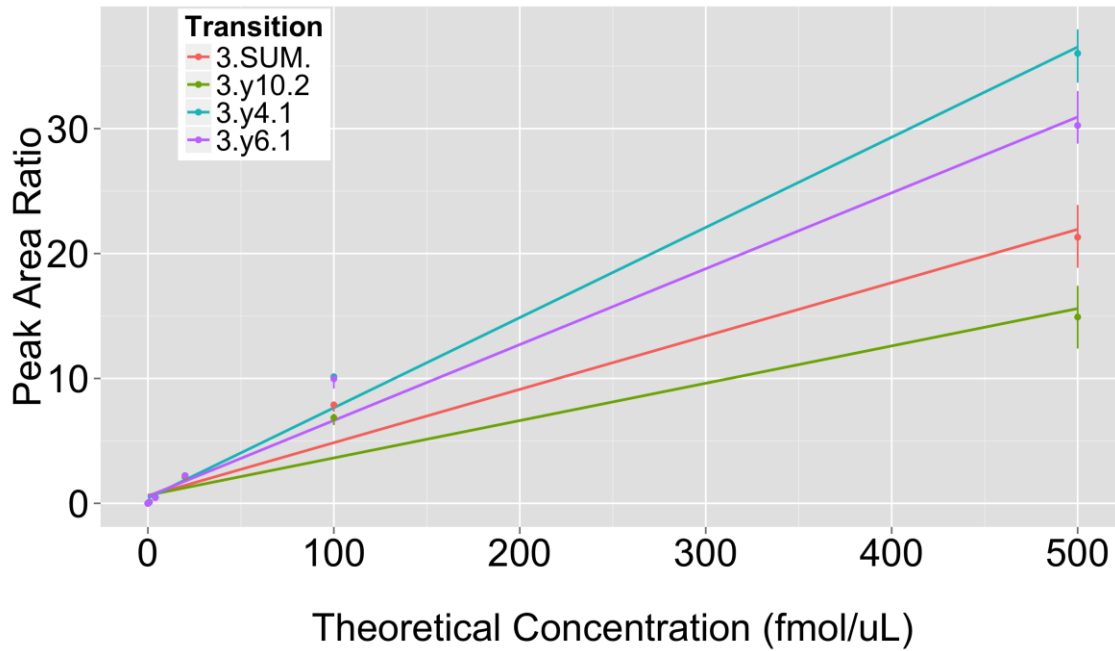

### Analyte: SAIC02A.GLQSLPTHDPSPQLQR

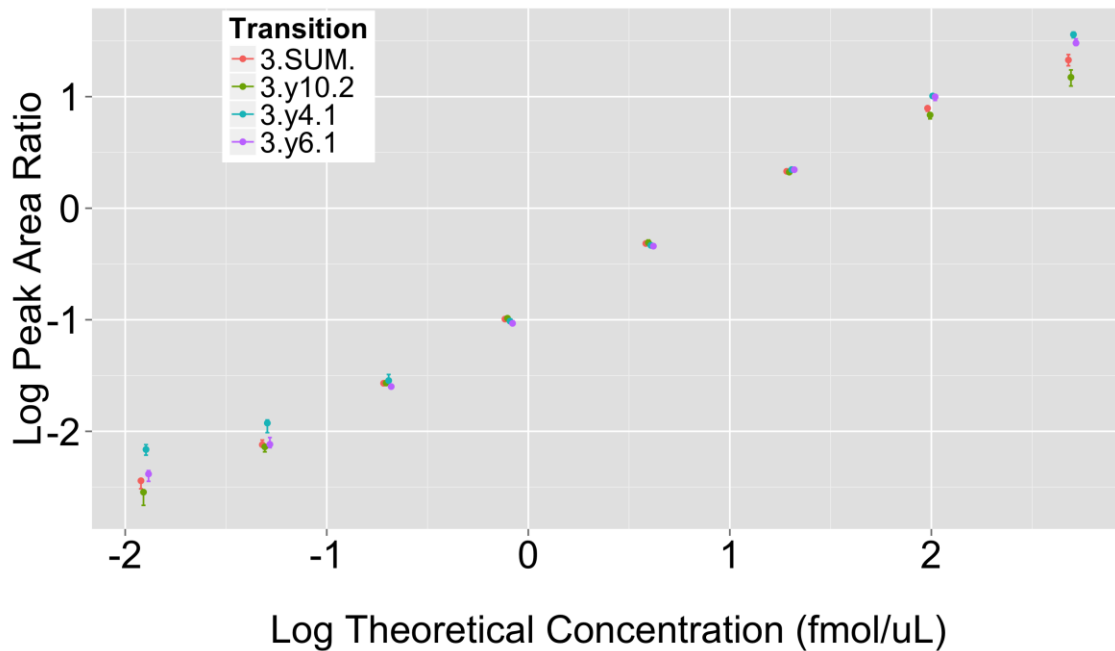

### Analyte: SAIC07B.GSLTFEPLTLVPIQTK

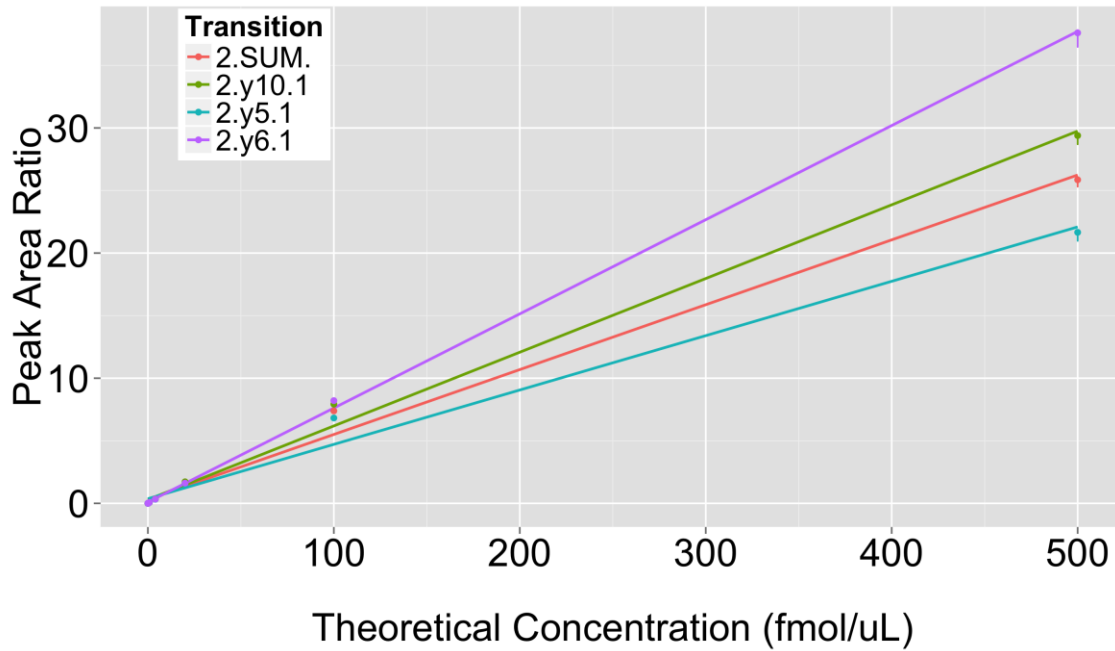

### Analyte: SAIC07B.GSLTFEPLTLVPIQTK

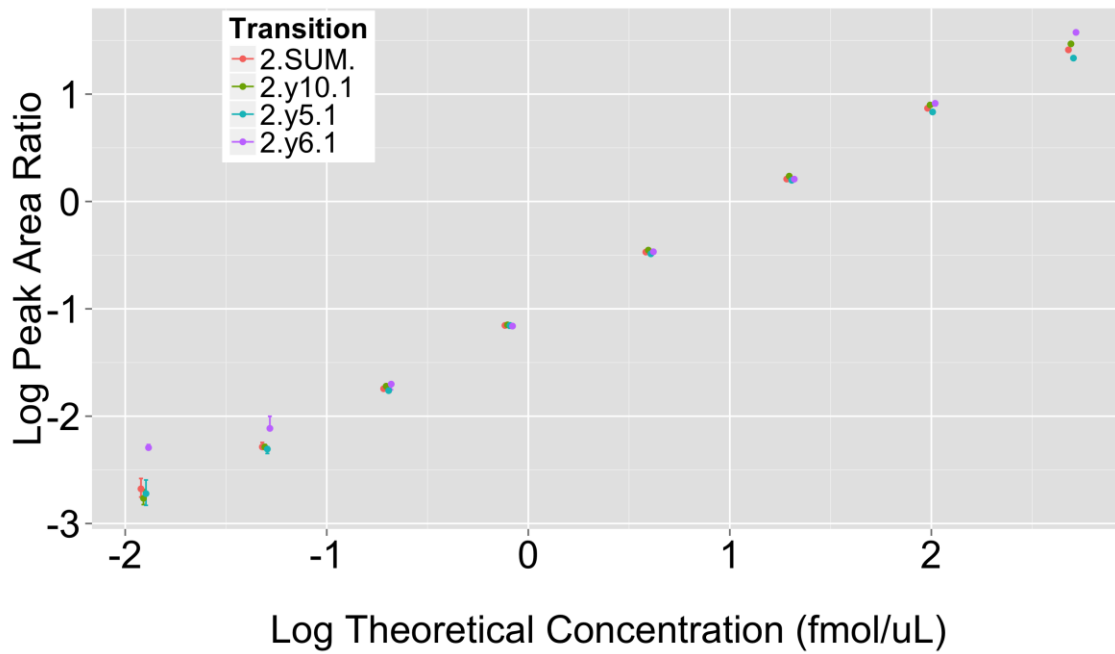

### Analyte: SAIC07E.TLSLDEVYLIDSGAQYK

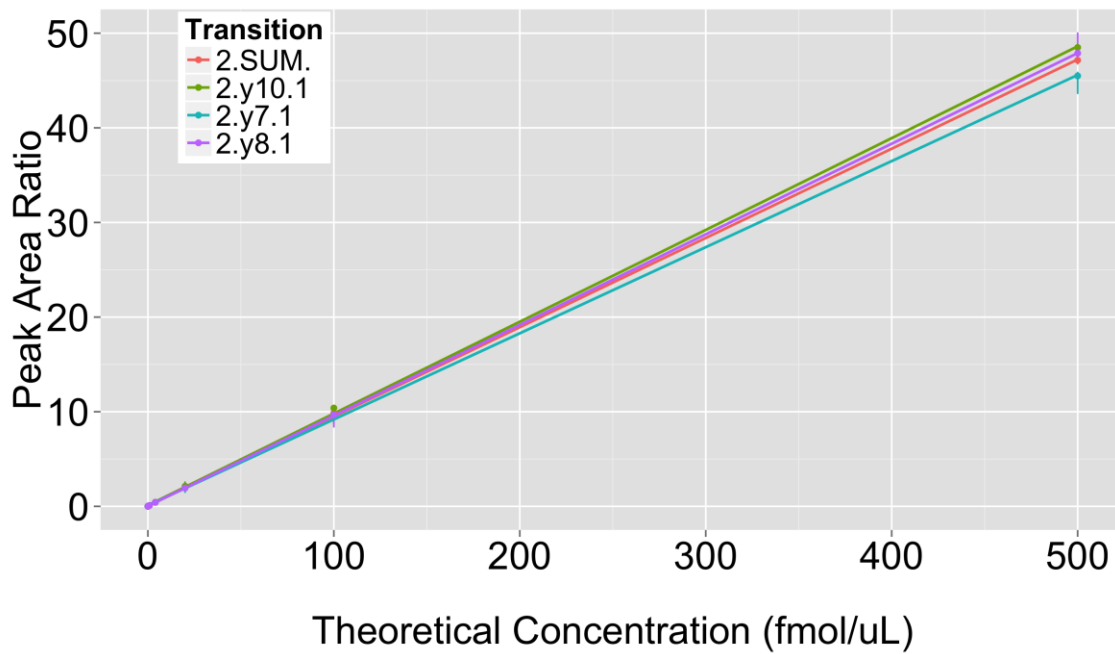

### Analyte: SAIC07E.TLSLDEVYLIDSGAQYK

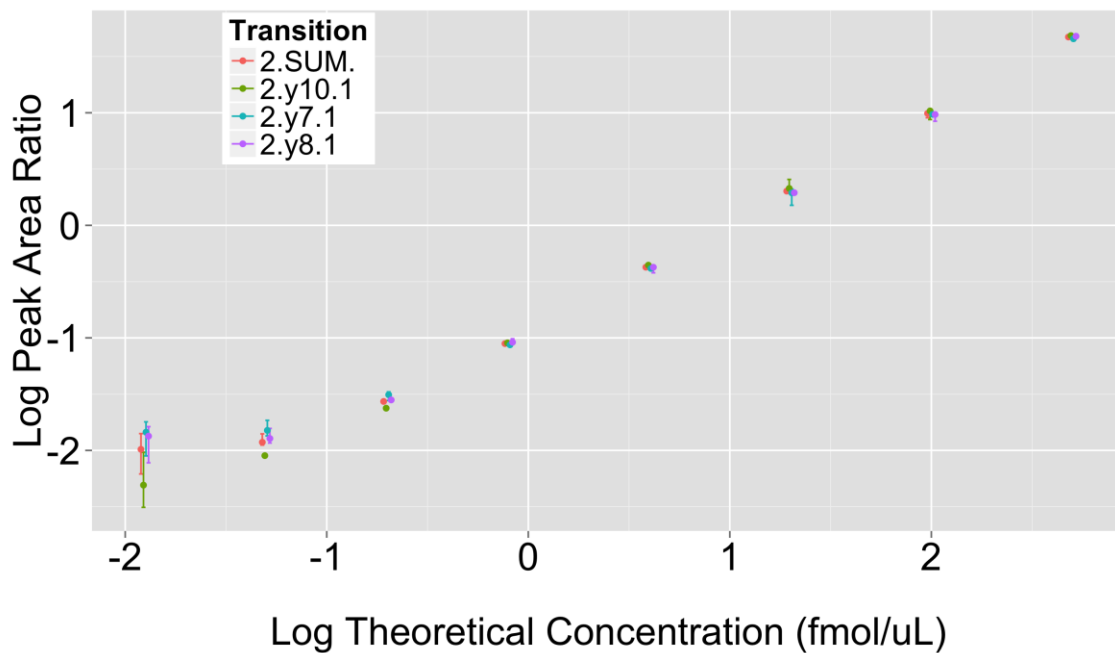

### Analyte: SAIC13B.AAYLQETGKPLDETLK

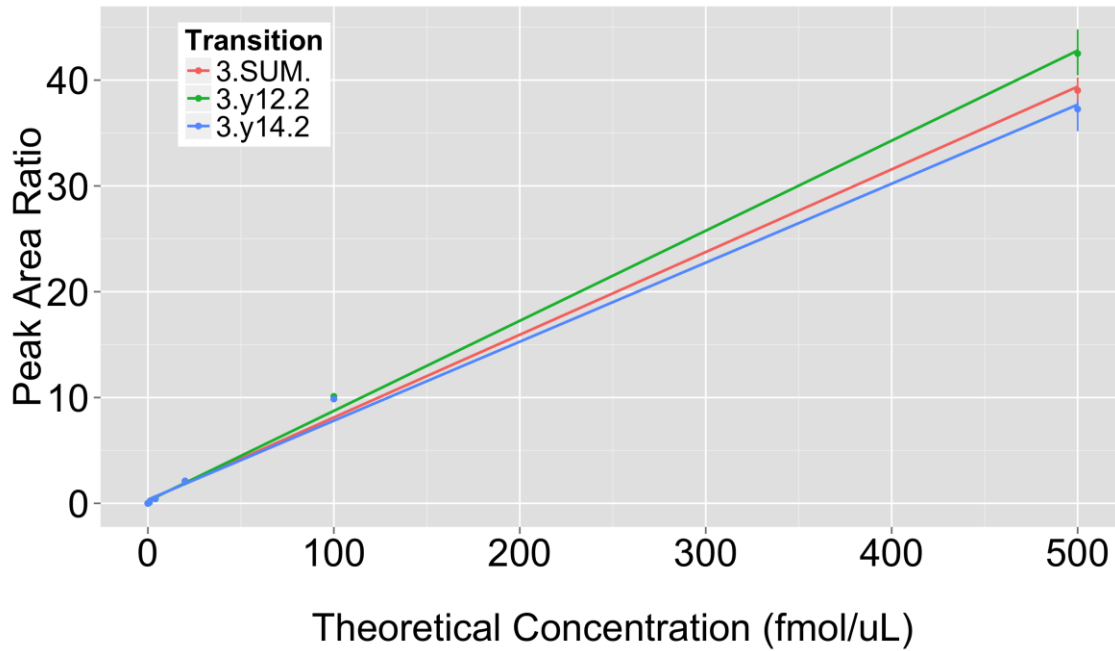

### Analyte: SAIC13B.AAYLQETGKPLDETLK

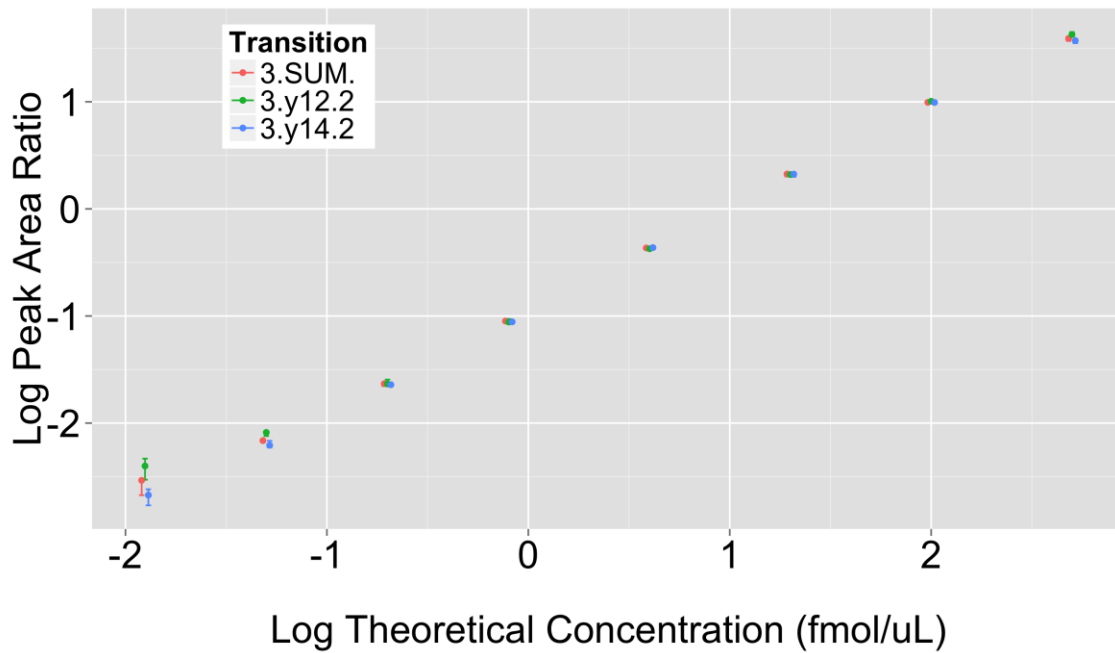

### Analyte: SAIC13C.GVDEATIIDILTK

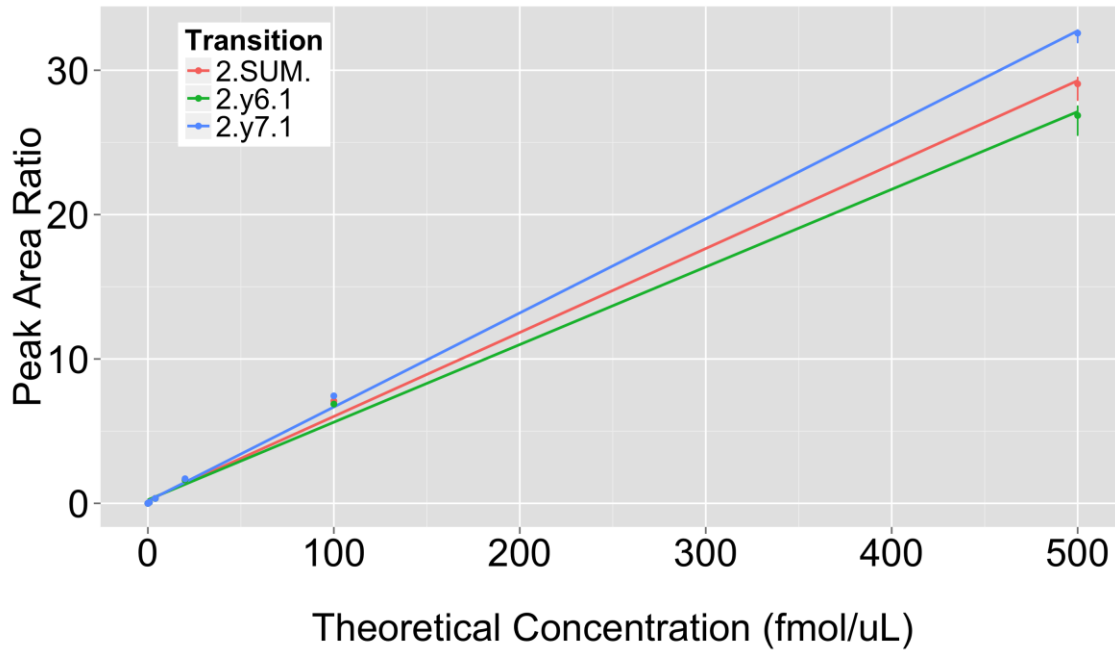

### Analyte: SAIC13C.GVDEATIIDILTK

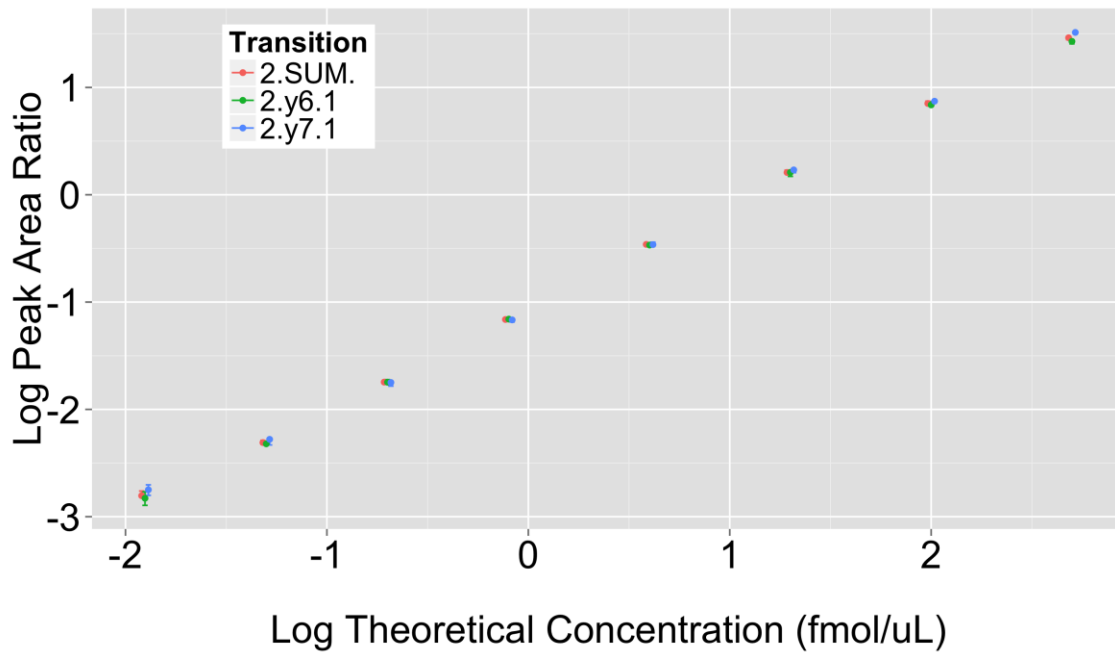



### Analyte: SAIC14C.DEGNYLDDALVR

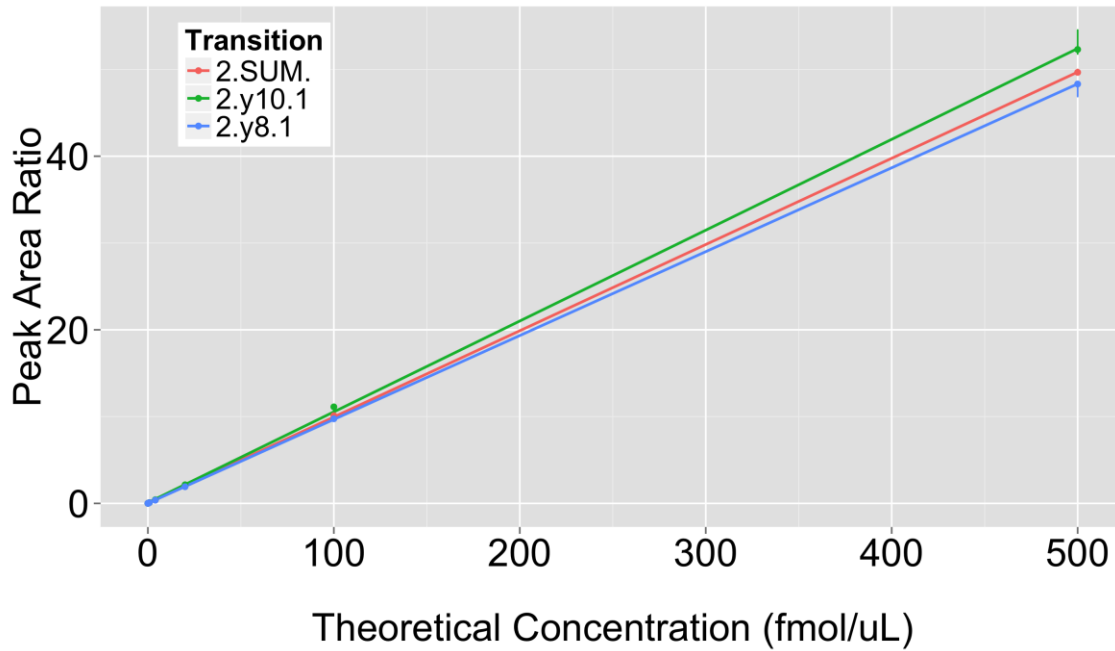

### Analyte: SAIC14C.DEGNYLDDALVR

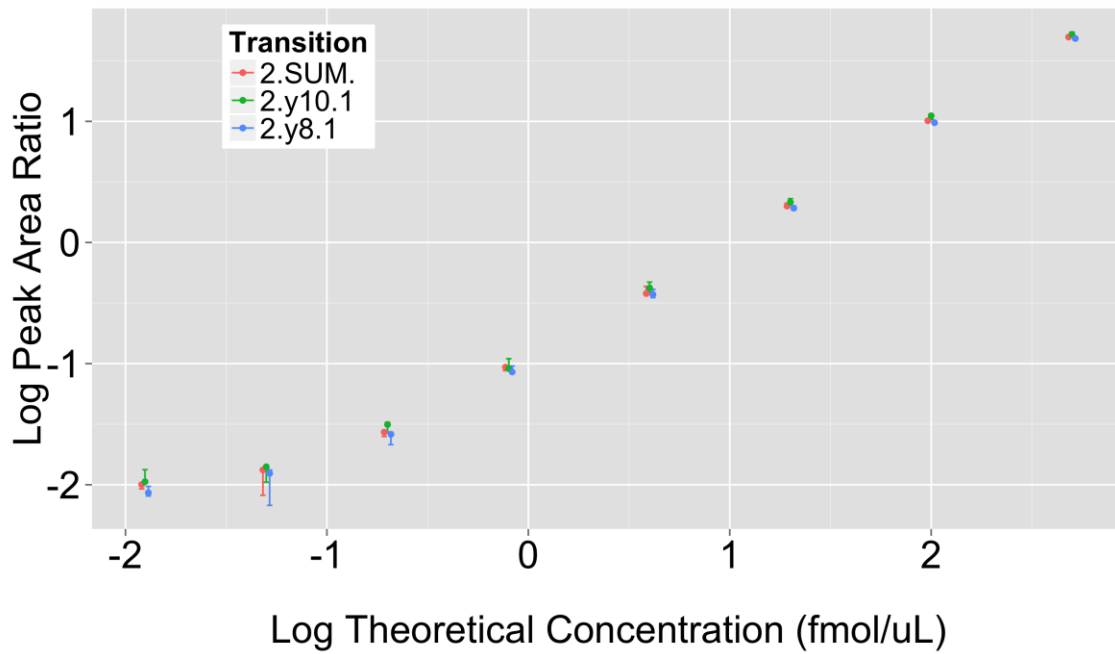

### Analyte: SAIC16D.GLQTSQDAR

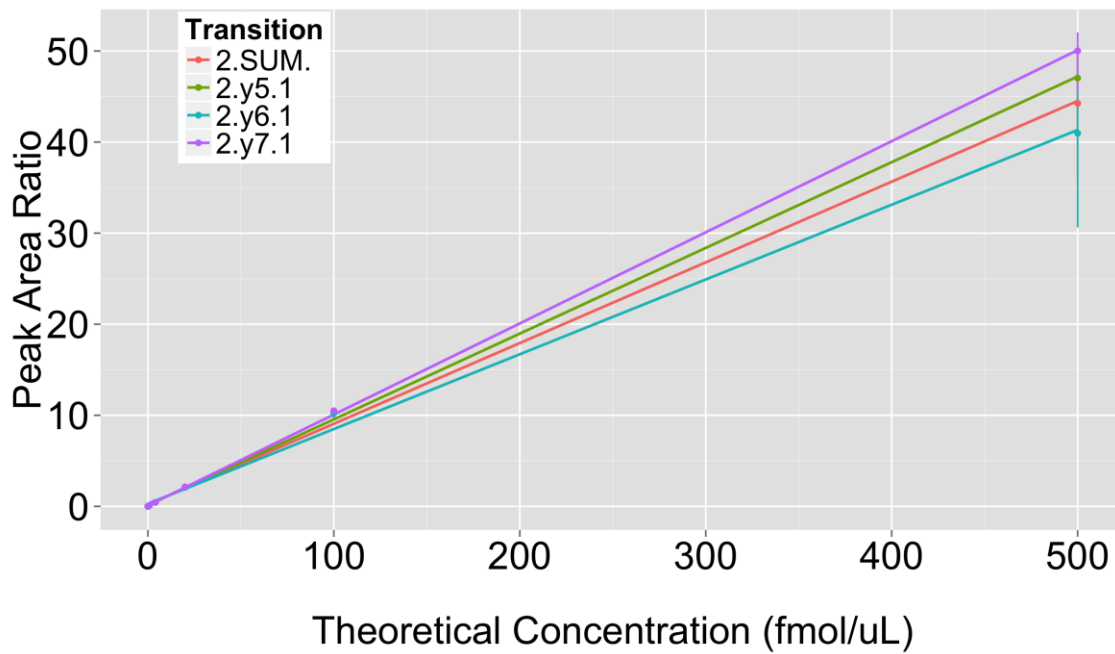

### Analyte: SAIC16D.GLQTSQDAR

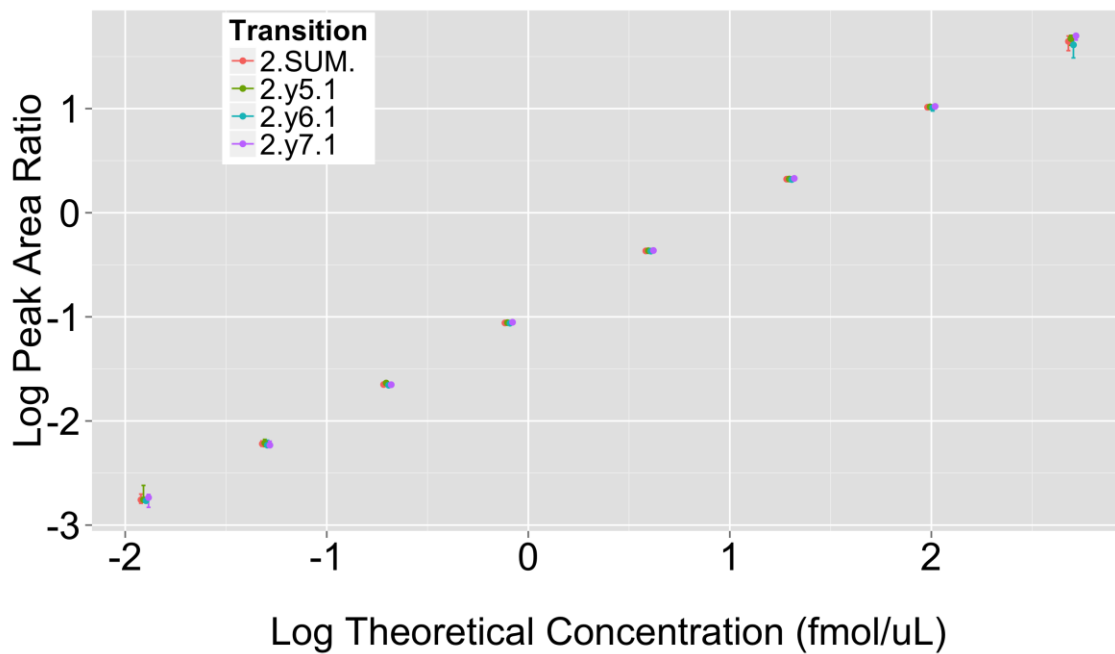

### Analyte: SAIC19D.FGNDVQHFK

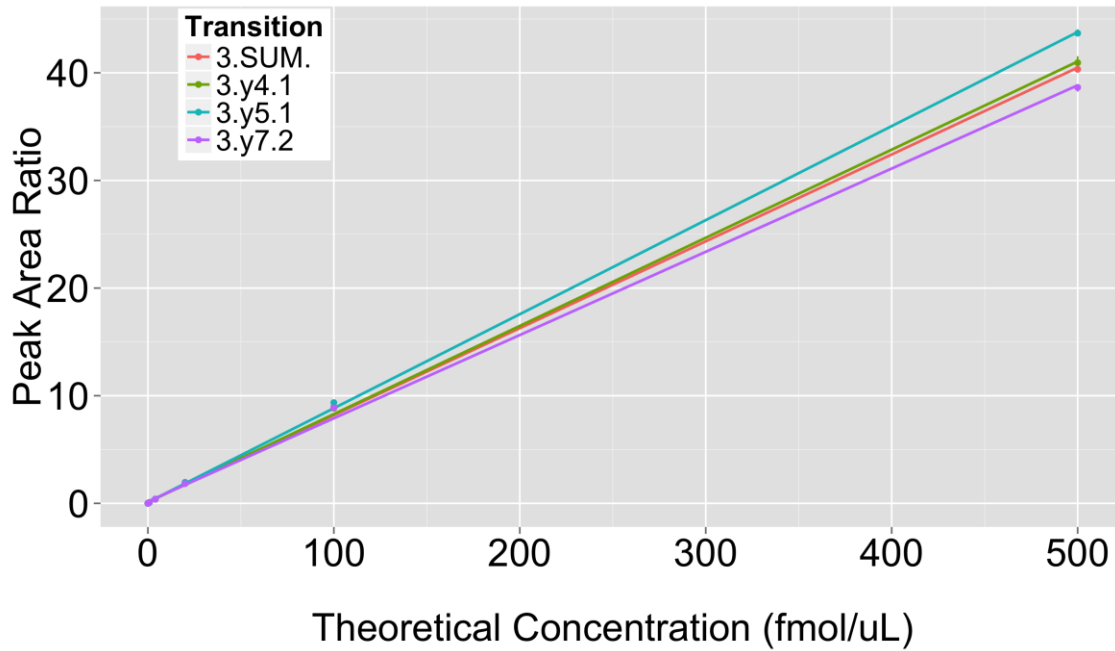

### Analyte: SAIC19D.FGNDVQHFK

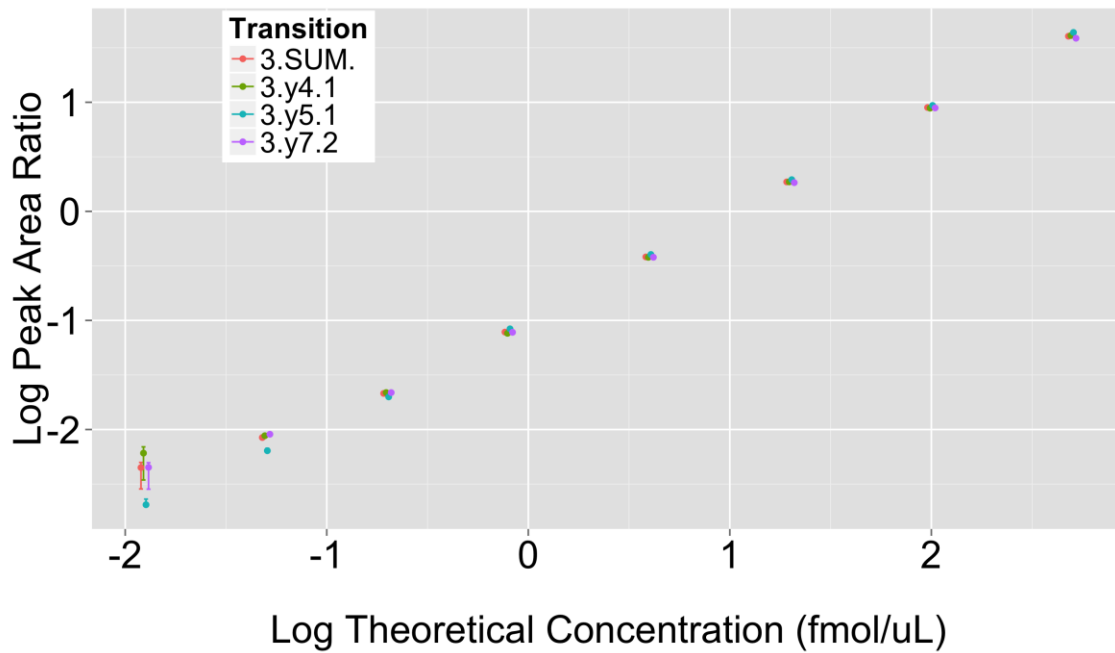

### Analyte: SAIC21C.SIEEIVR

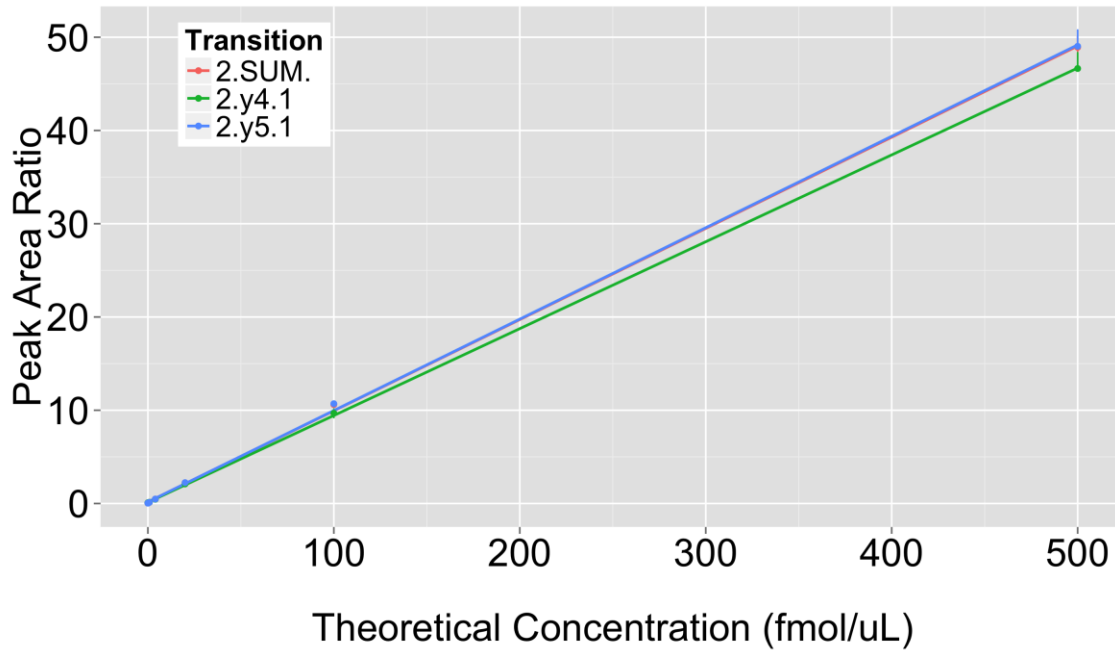

### Analyte: SAIC21C.SIEEIVR

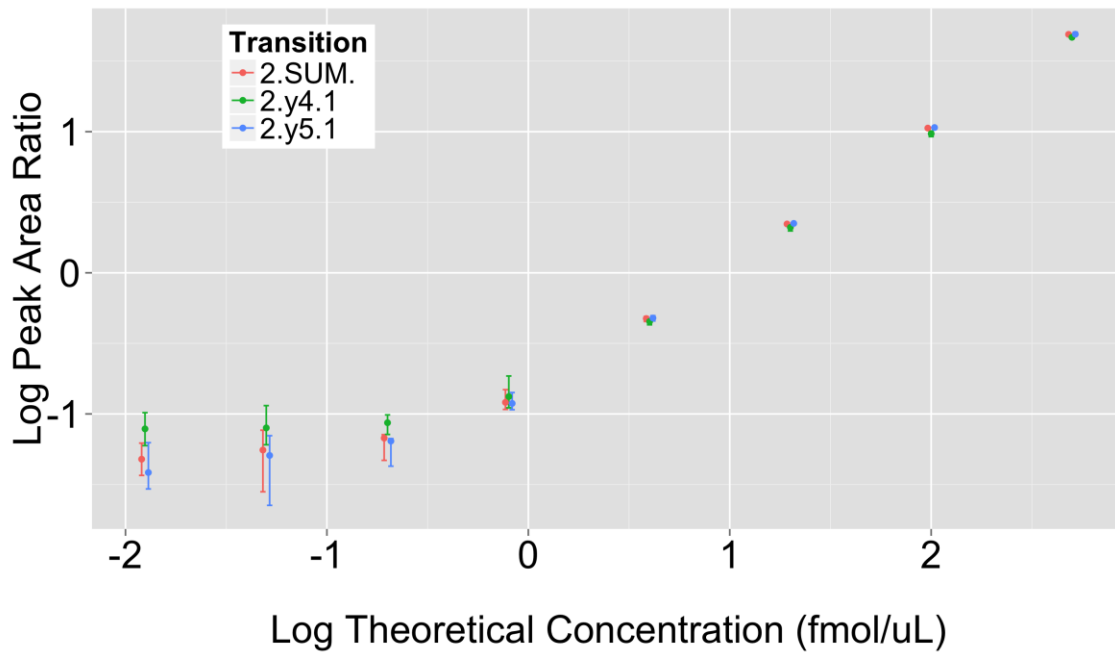

### Analyte: SAIC22D.YISLIYTNYEAGK

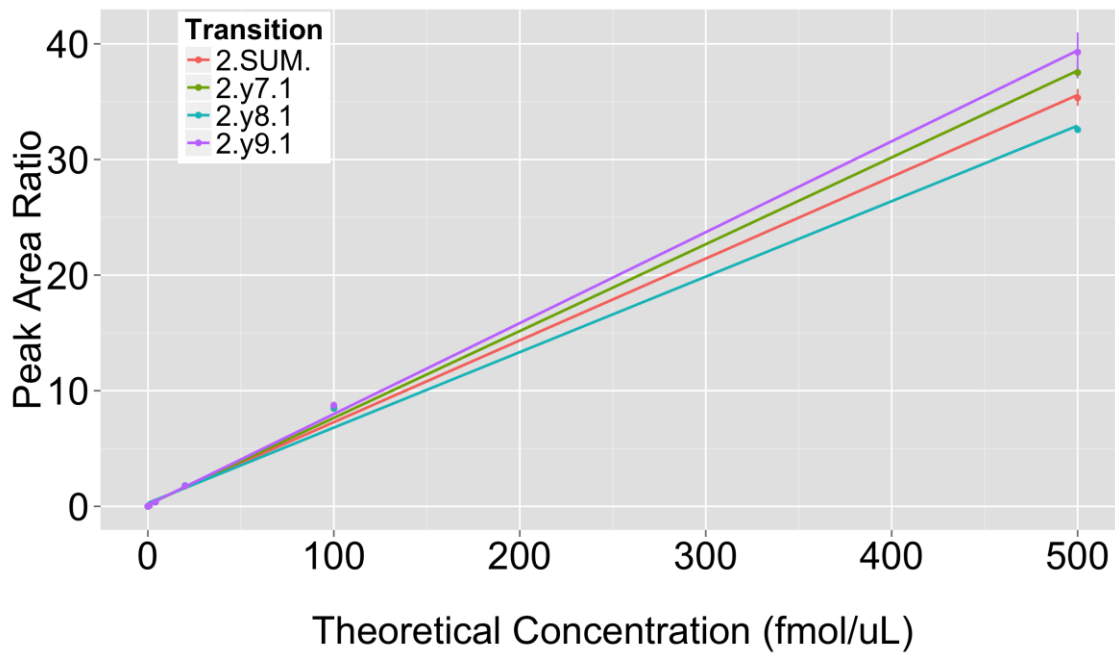

### Analyte: SAIC22D.YISLIYTNYEAGK

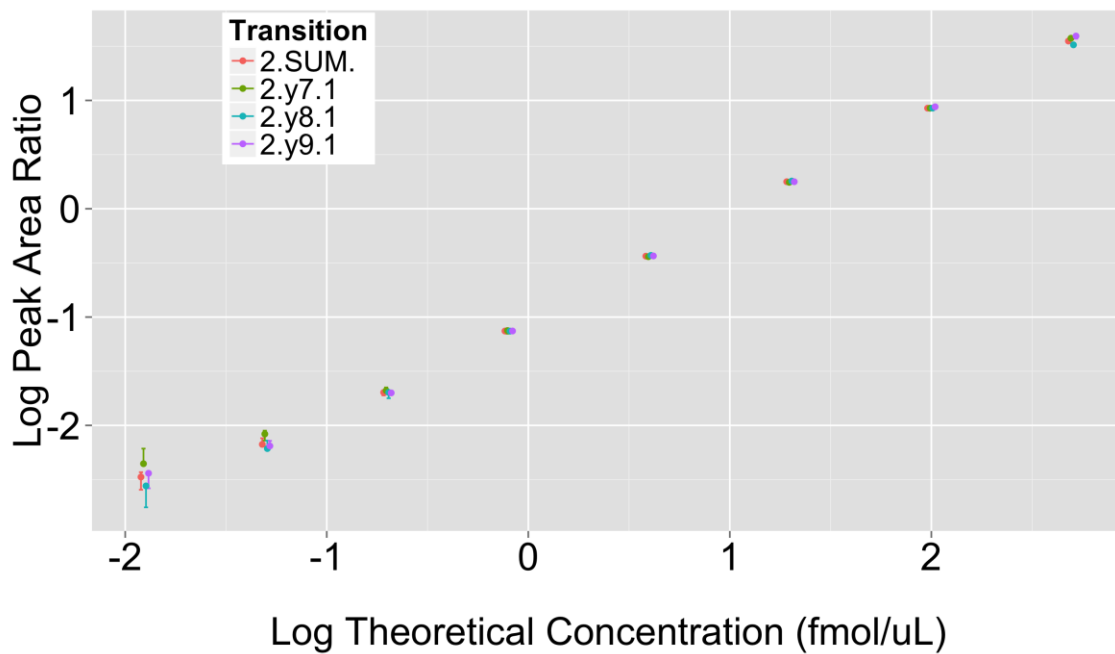

### Analyte: SAIC23B.DGVVEITGK

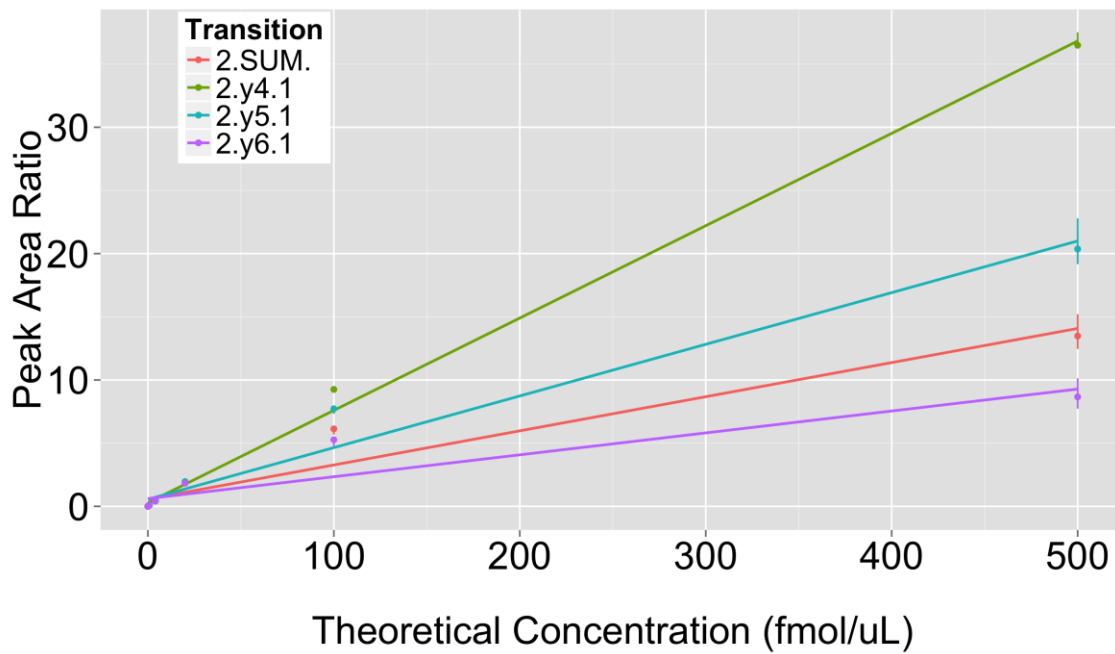

### Analyte: SAIC23B.DGVVEITGK

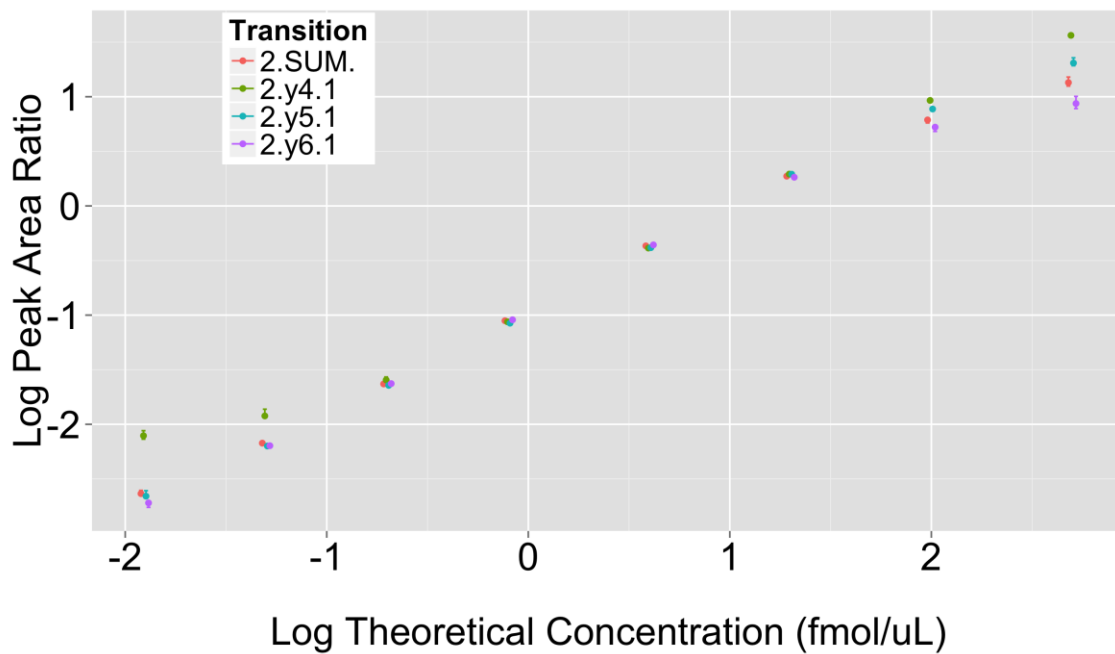

### Analyte: SAIC23C.VSLDVNHFAPDELTVK

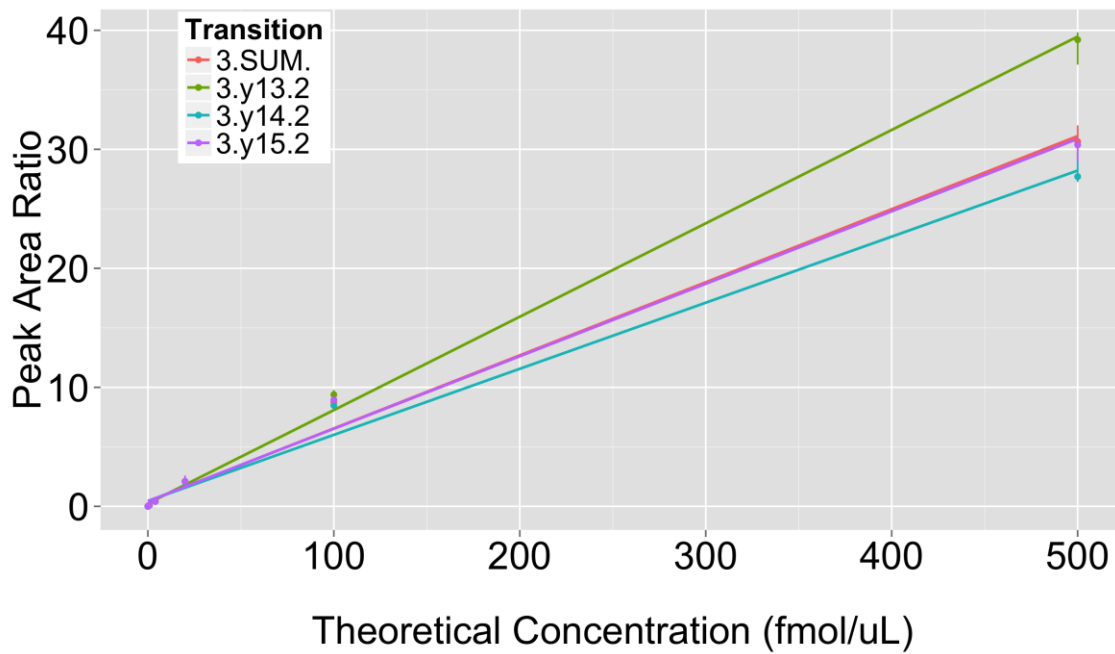

### Analyte: SAIC23C.VSLDVNHFAPDELTVK

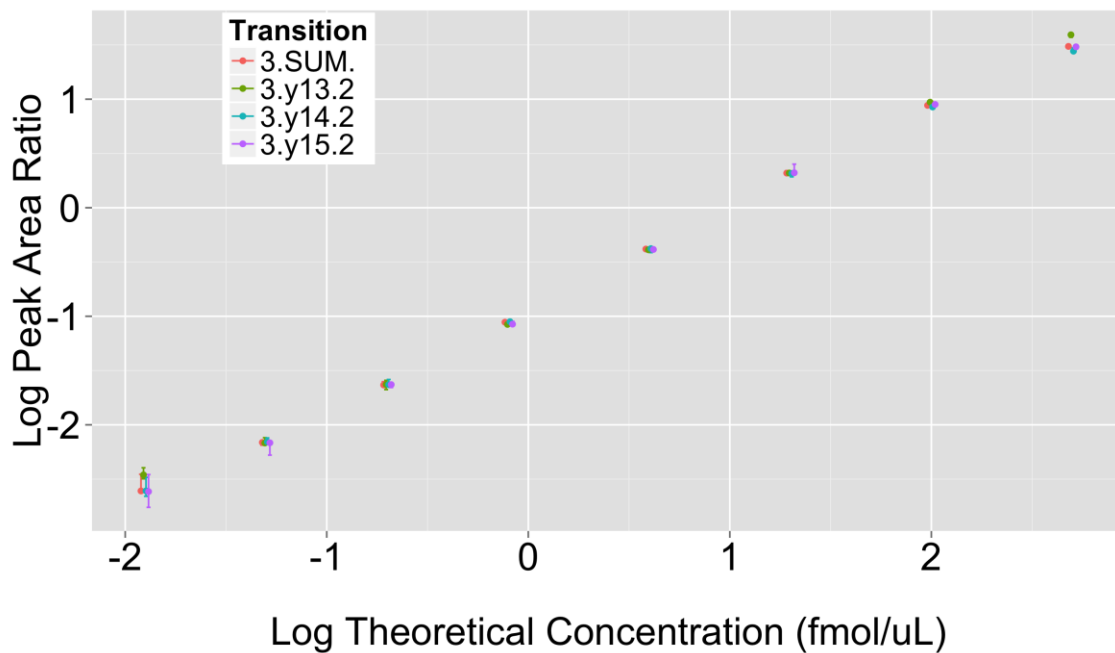

### Analyte: SAIC23E.LFDQAFGLPR

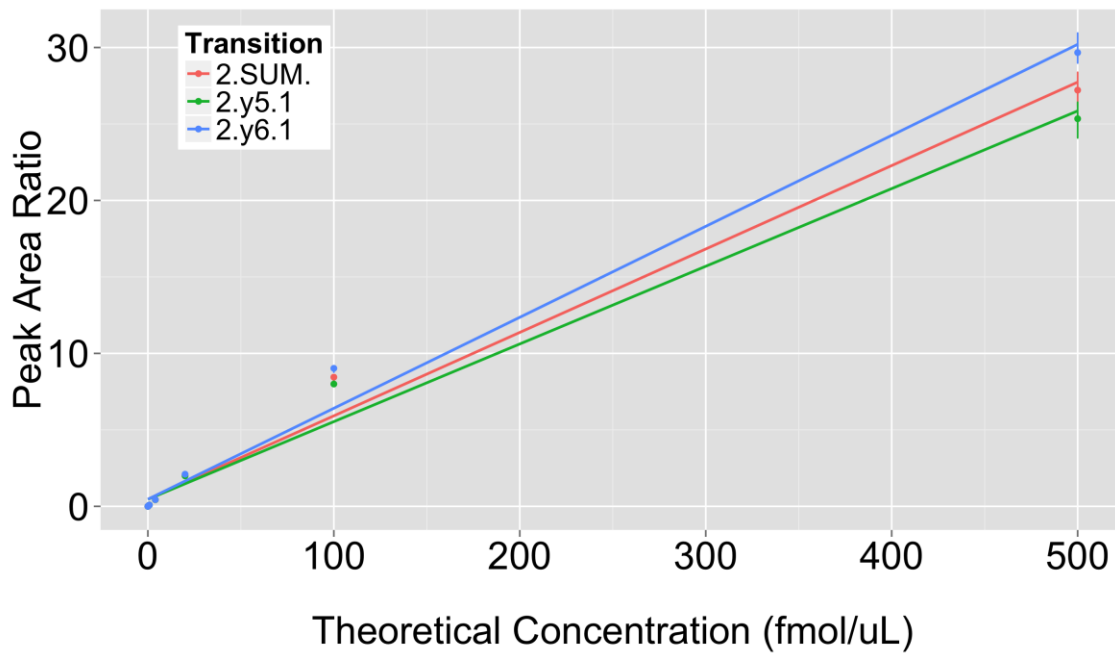

### Analyte: SAIC23E.LFDQAFGLPR

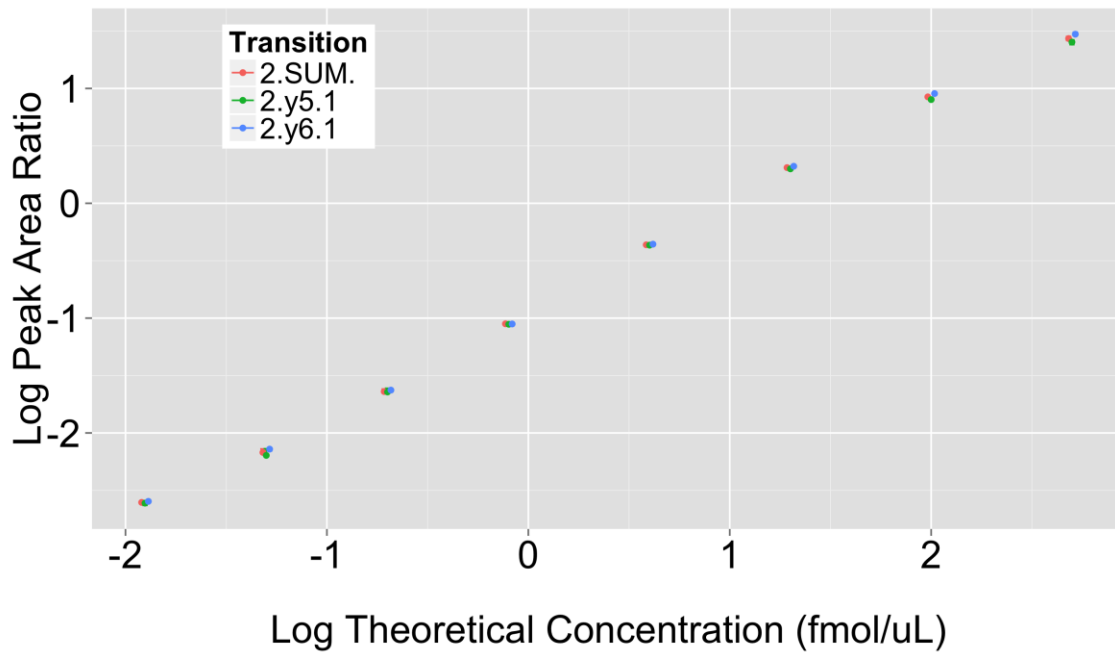



### Analyte: SAIC24B.ISTLSC[+57]ENK

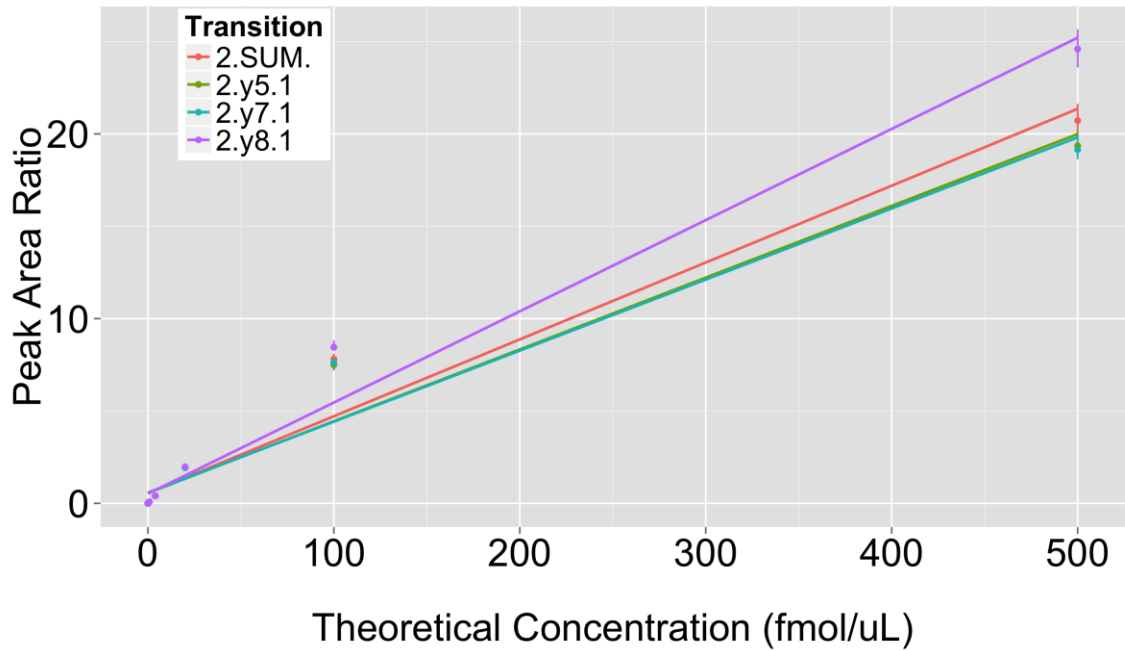

### Analyte: SAIC24B.ISTLSC[+57]ENK

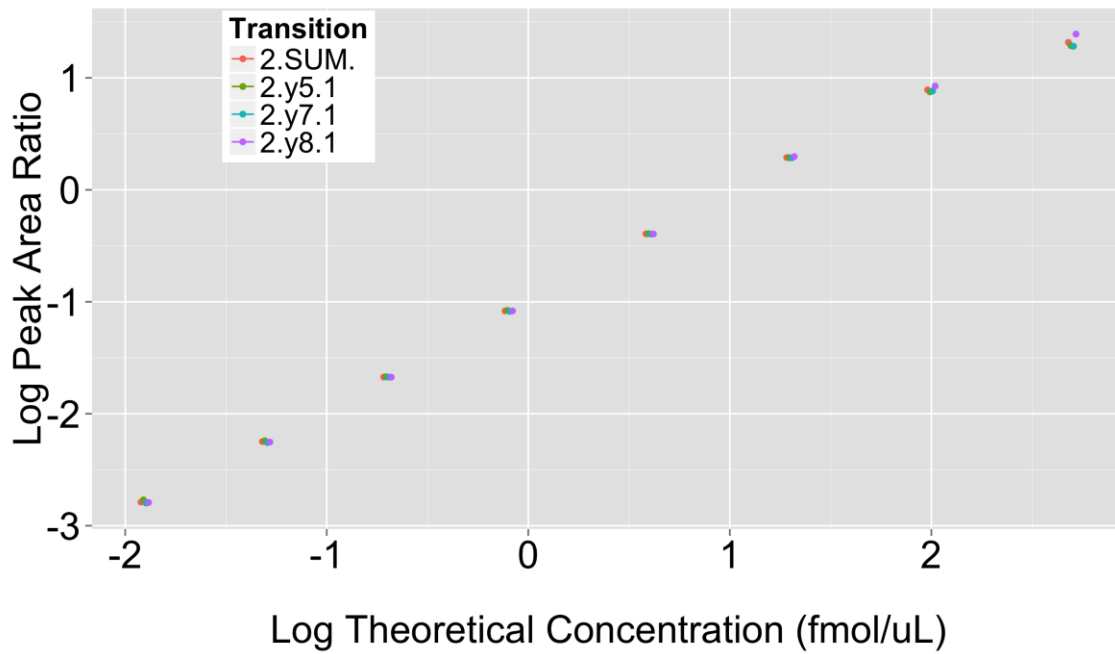

### Analyte: SAIC25B.SFVLNLGK

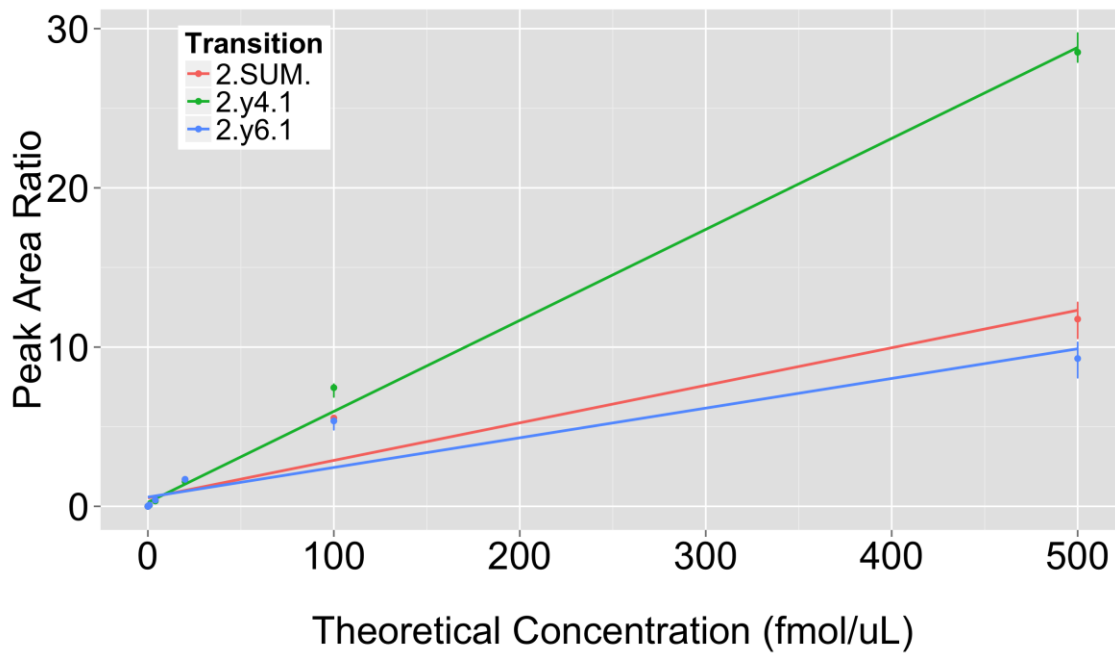

### Analyte: SAIC25B.SFVLNLGK

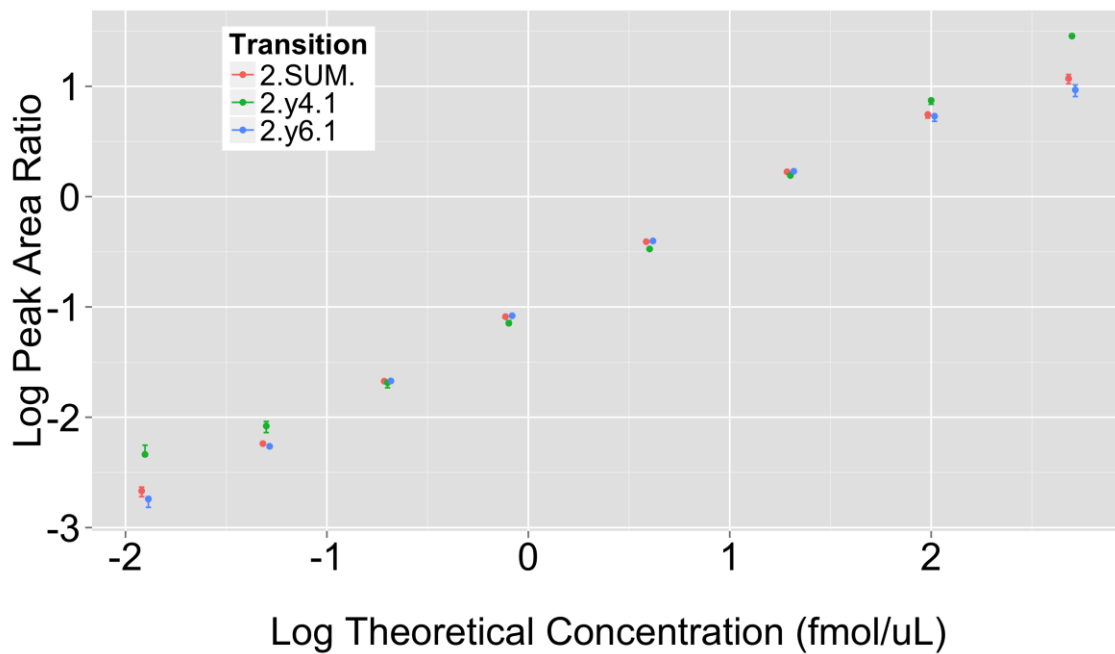

### Analyte: SAIC26C.IEVDLVTHSDPPR

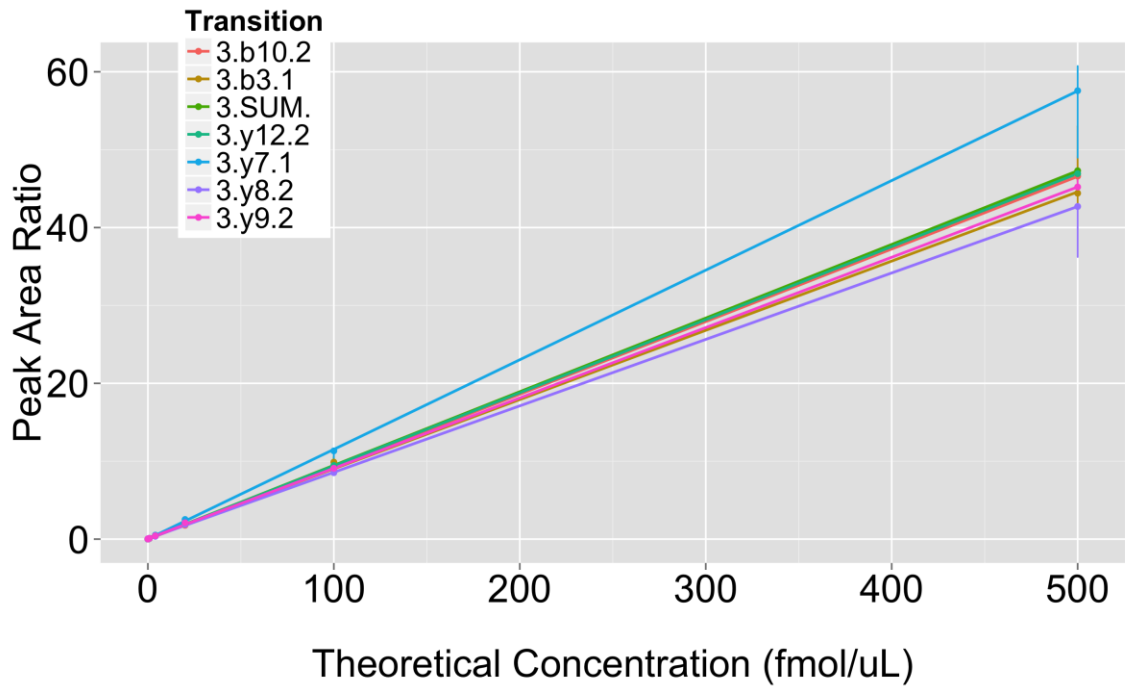

### Analyte: SAIC26C.IEVDLVTHSDPPR

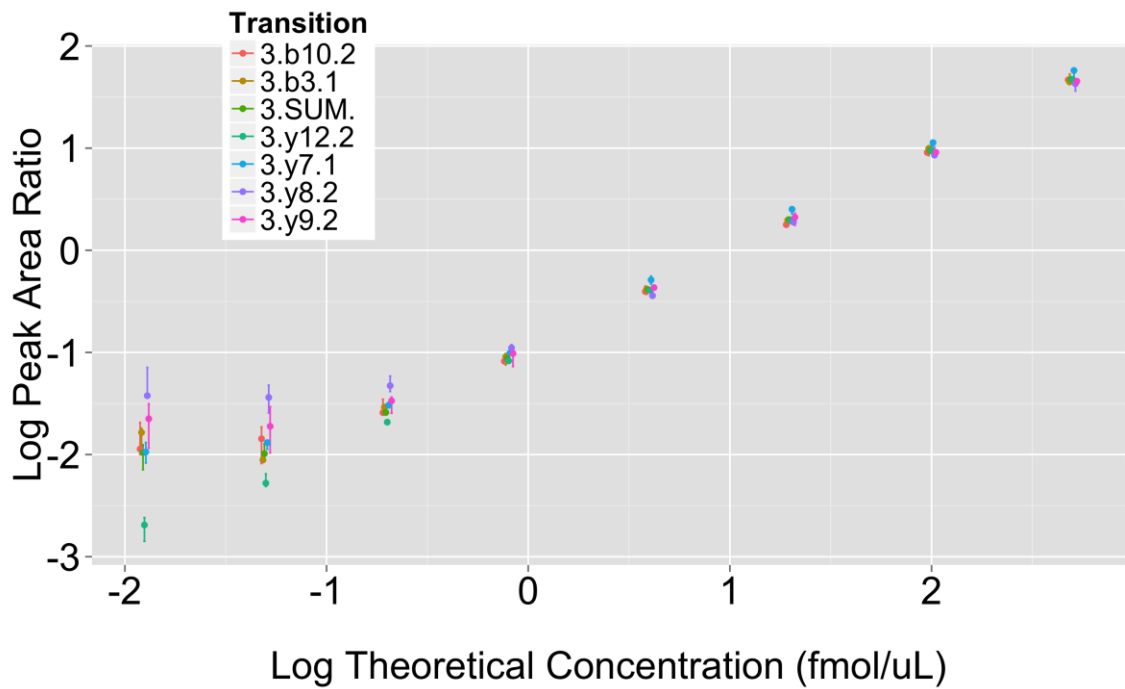

### Analyte: SAIC27C.LVQGSILK

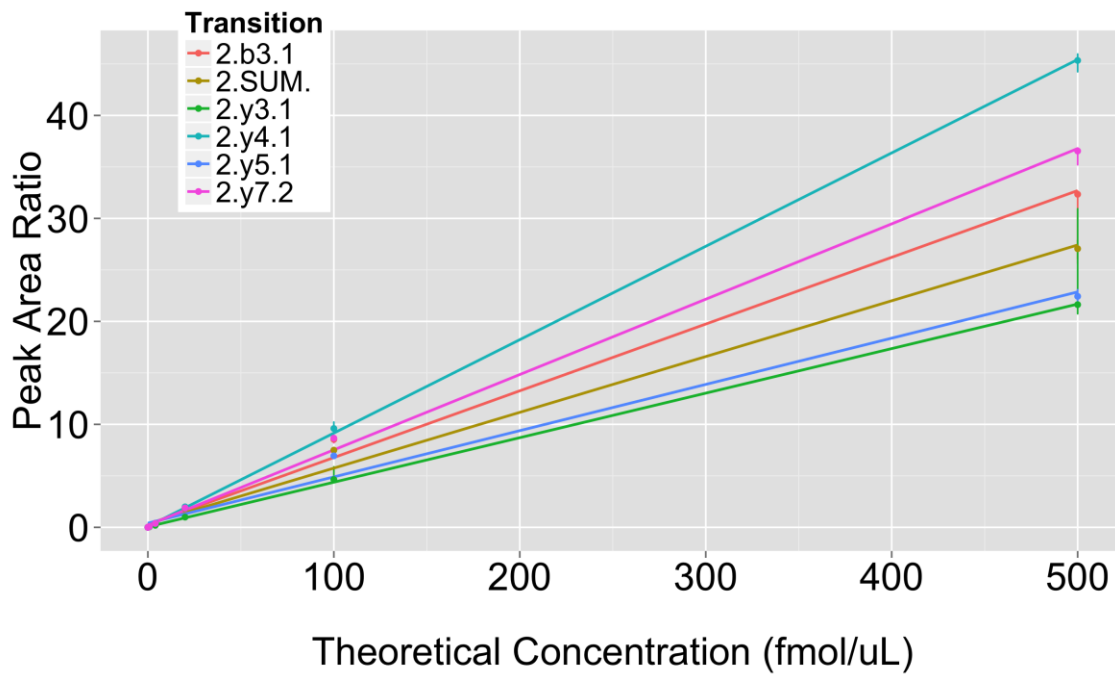

### Analyte: SAIC27C.LVQGSILK

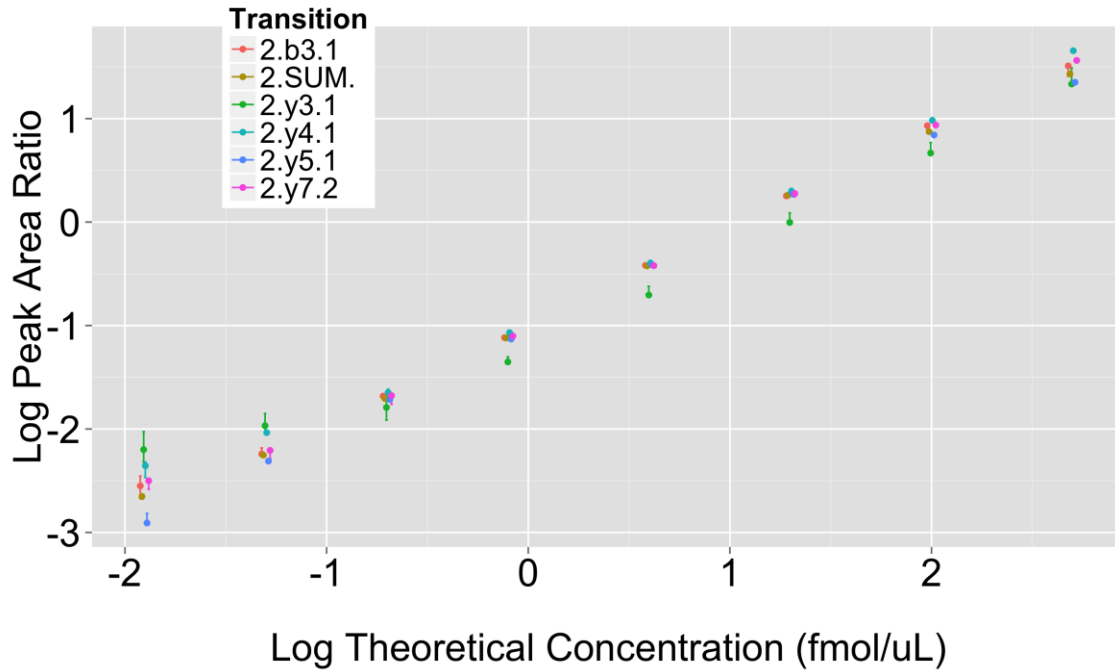

### Analyte: SAIC28A.ILNDDTALK

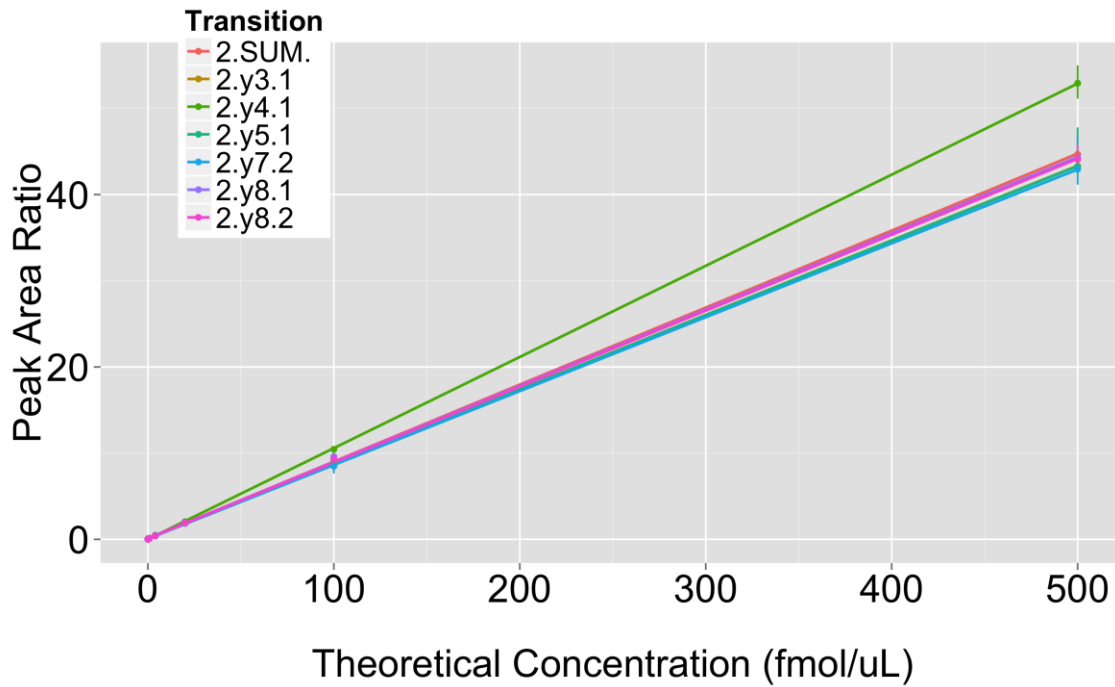

### Analyte: SAIC28A.ILNDDTALK

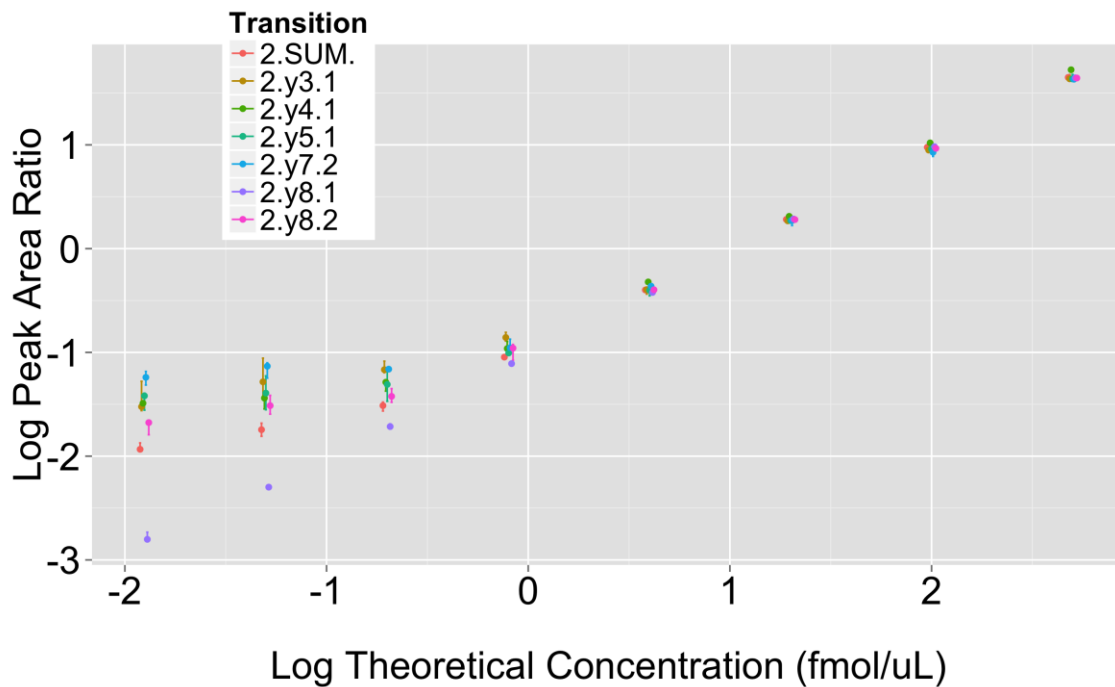

### Analyte: SAIC28B.IDIDPEETVK

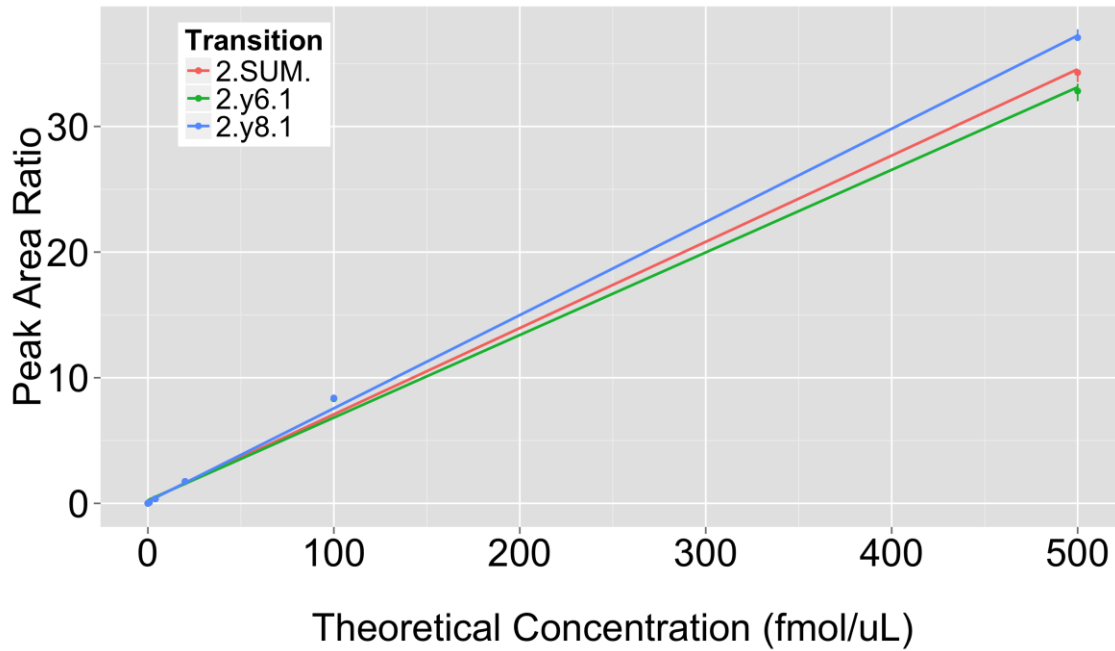

### Analyte: SAIC28B.IDIDPEETVK

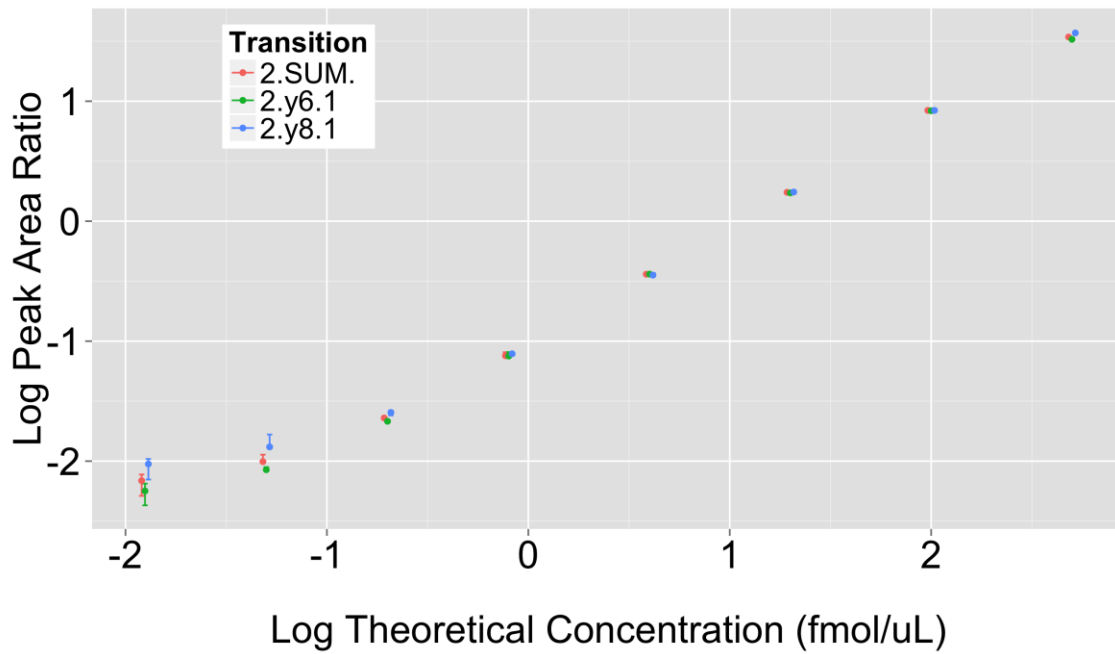

### Analyte: SAIC30C.IEQEFLTEALPVK

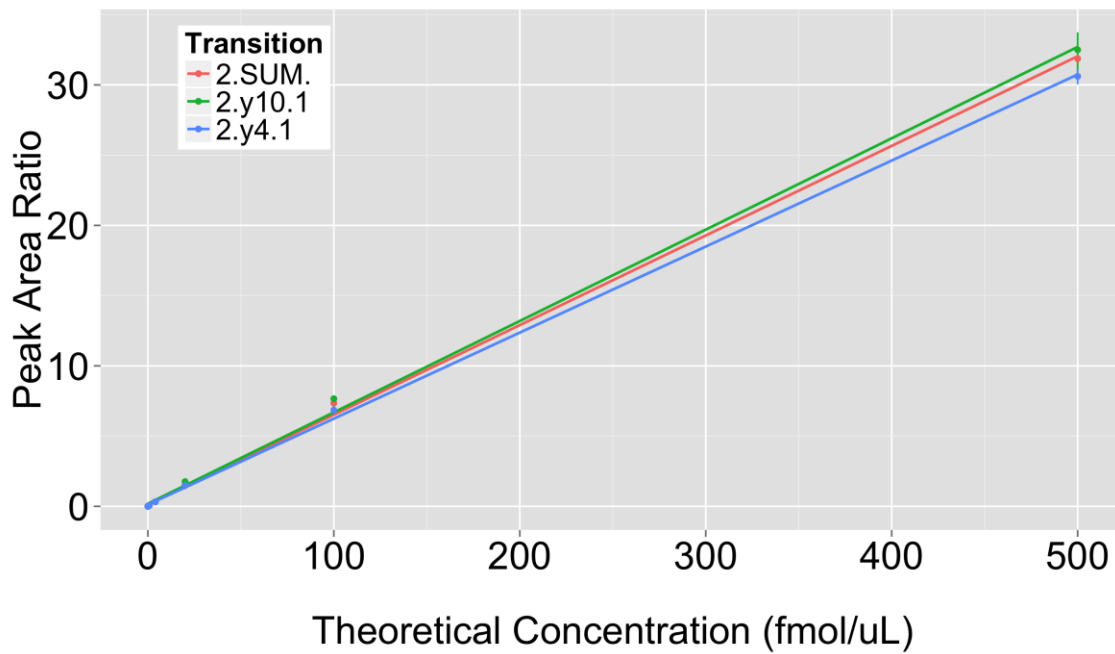

### Analyte: SAIC30C.IEQEFLTEALPVK

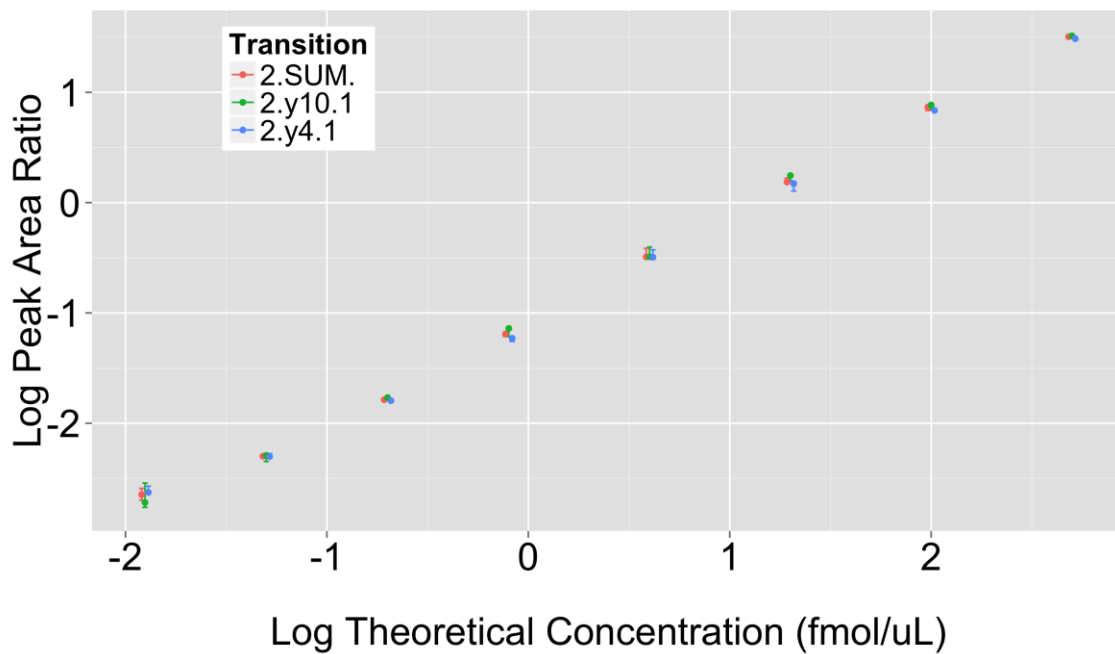

### Analyte: SAIC30E.DIQHWESLKPEER

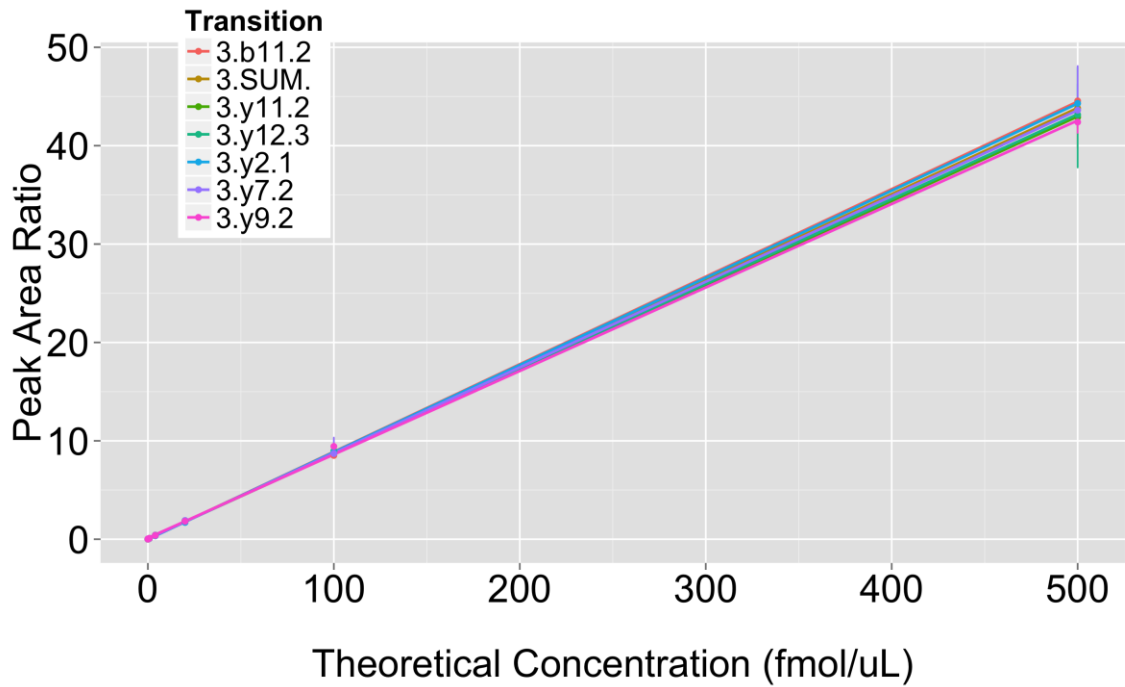

### Analyte: SAIC30E.DIQHWESLKPEER

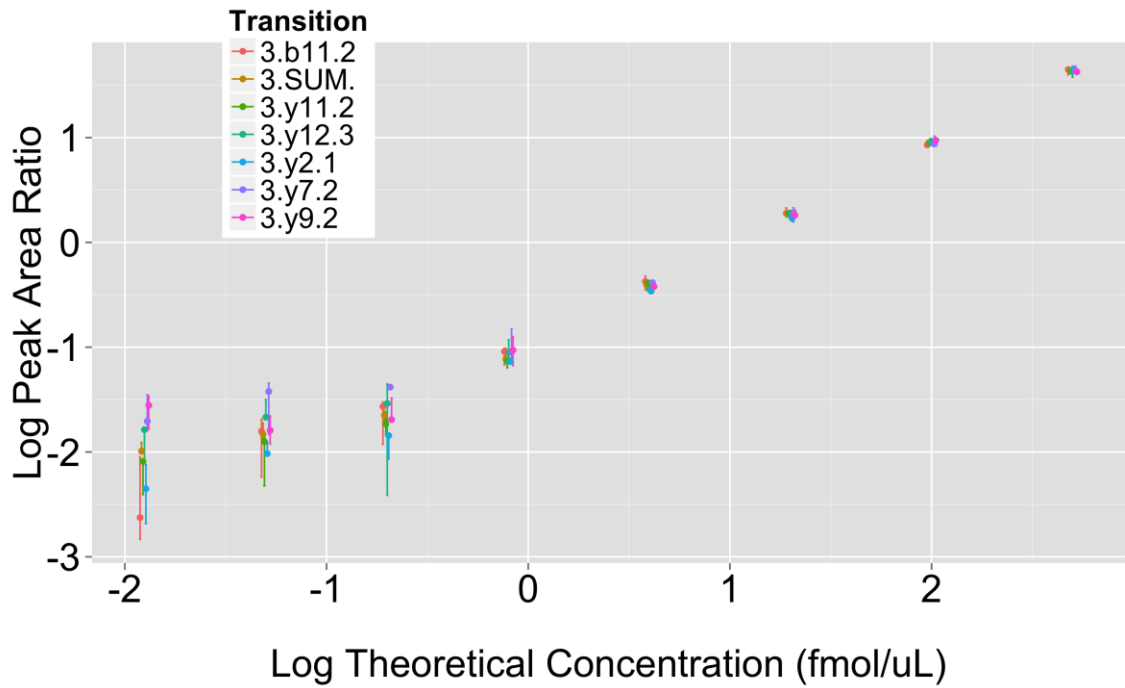



### Analyte: SAIC31A.TVEEAENIAVTSGVVR

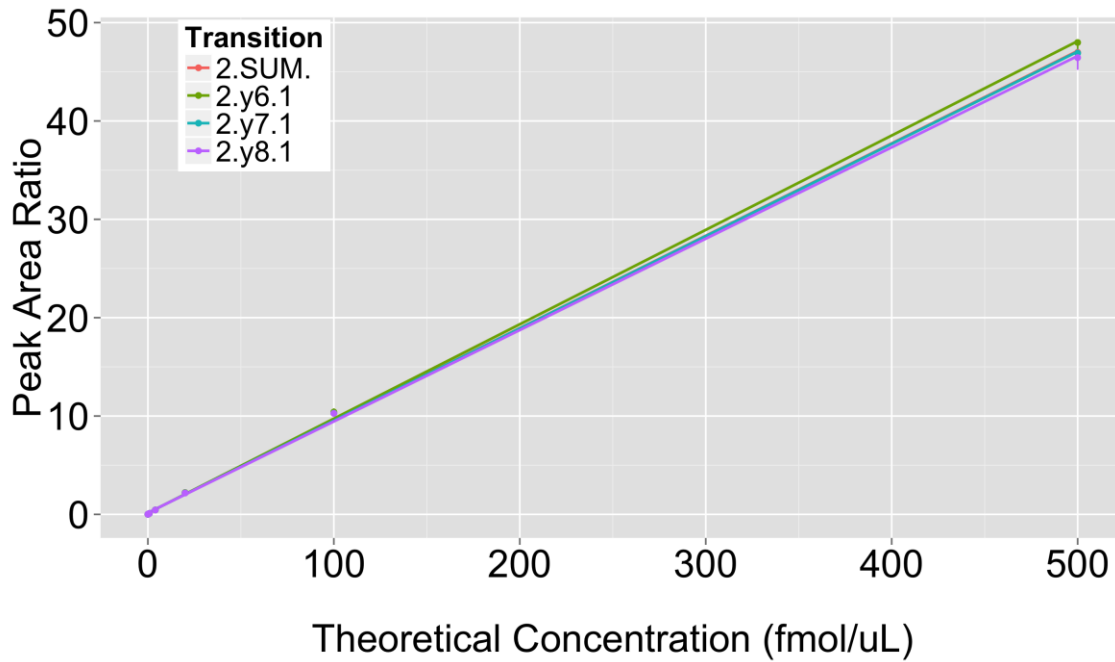

### Analyte: SAIC31A.TVEEAENIAVTSGVVR

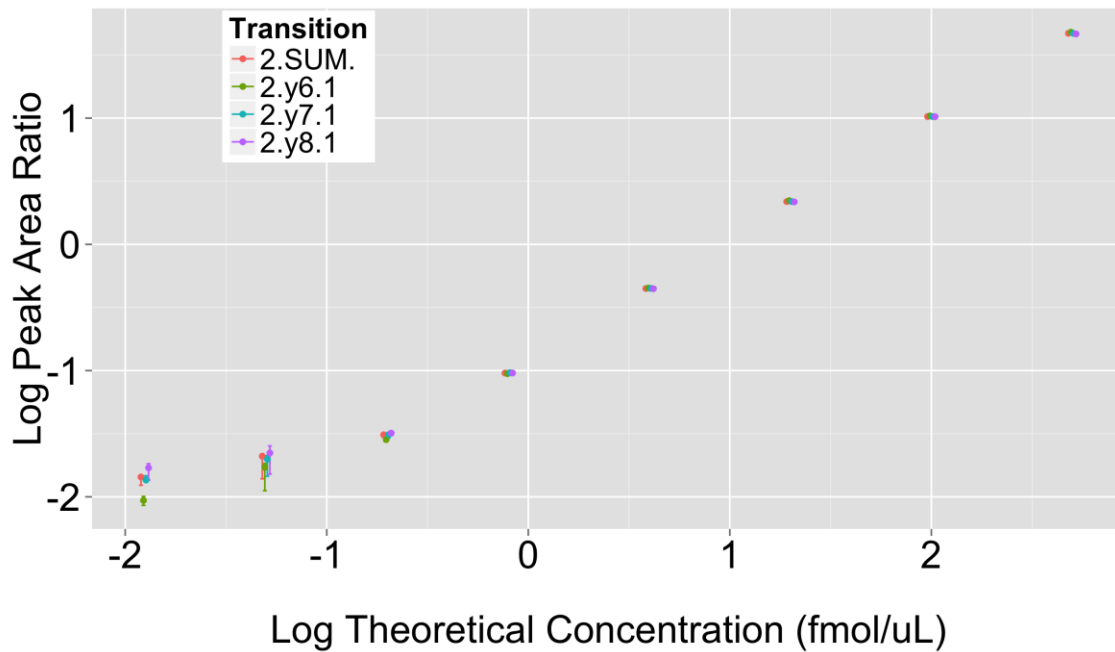

### Analyte: SAIC32C.YLAPSGPSGTLK

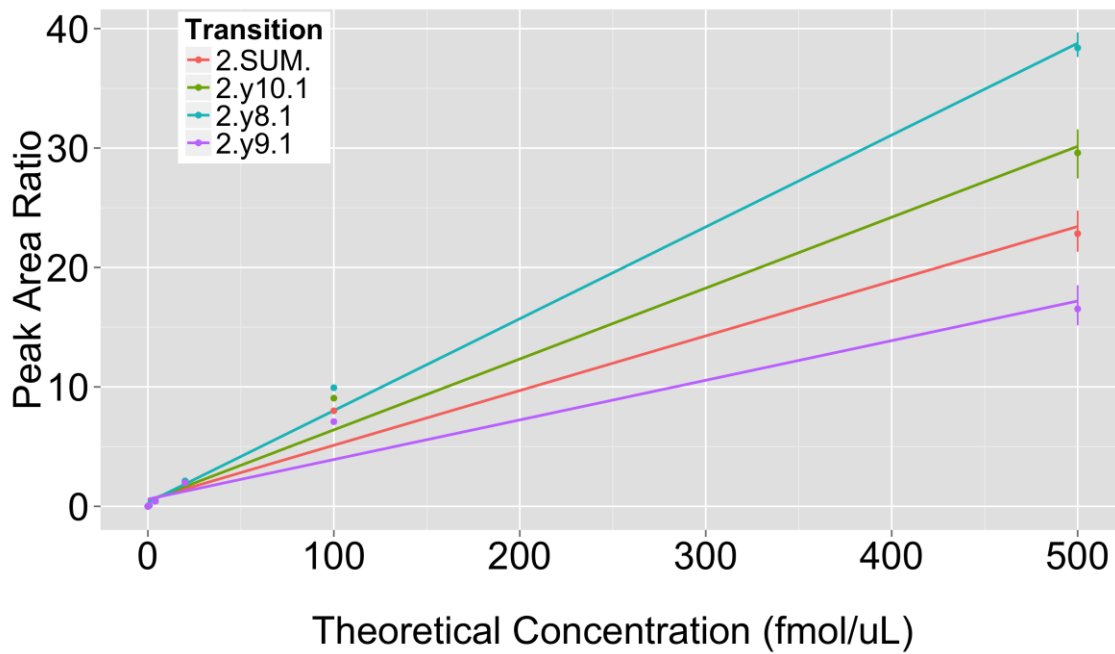

### Analyte: SAIC32C.YLAPSGPSGTLK

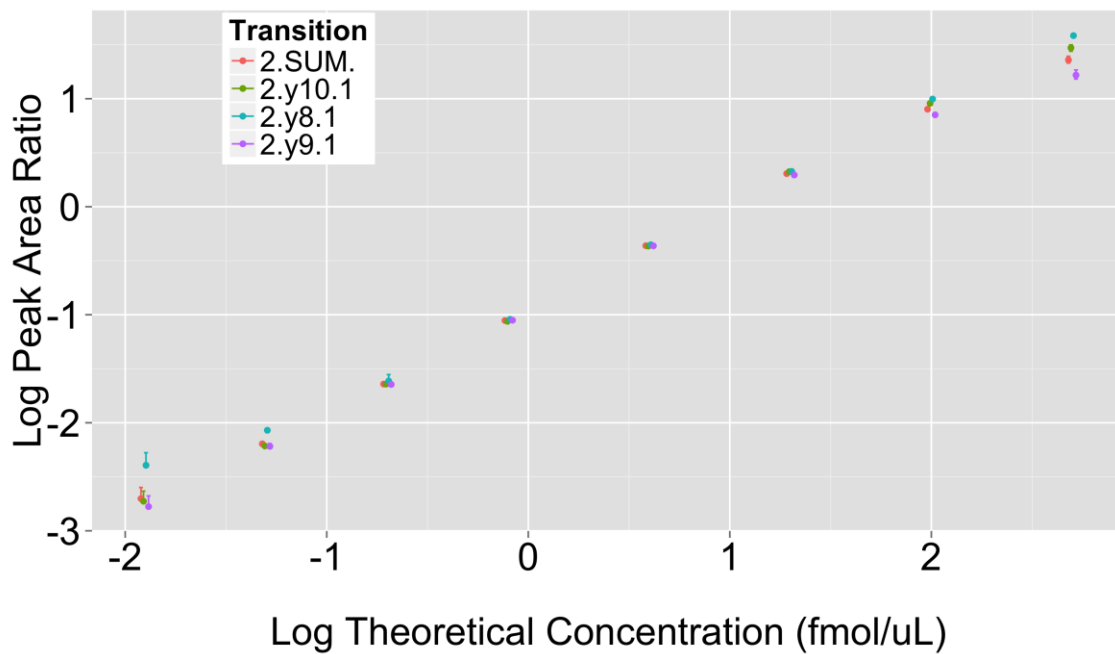

### Analyte: SAIC33B.AAEDYGVIK

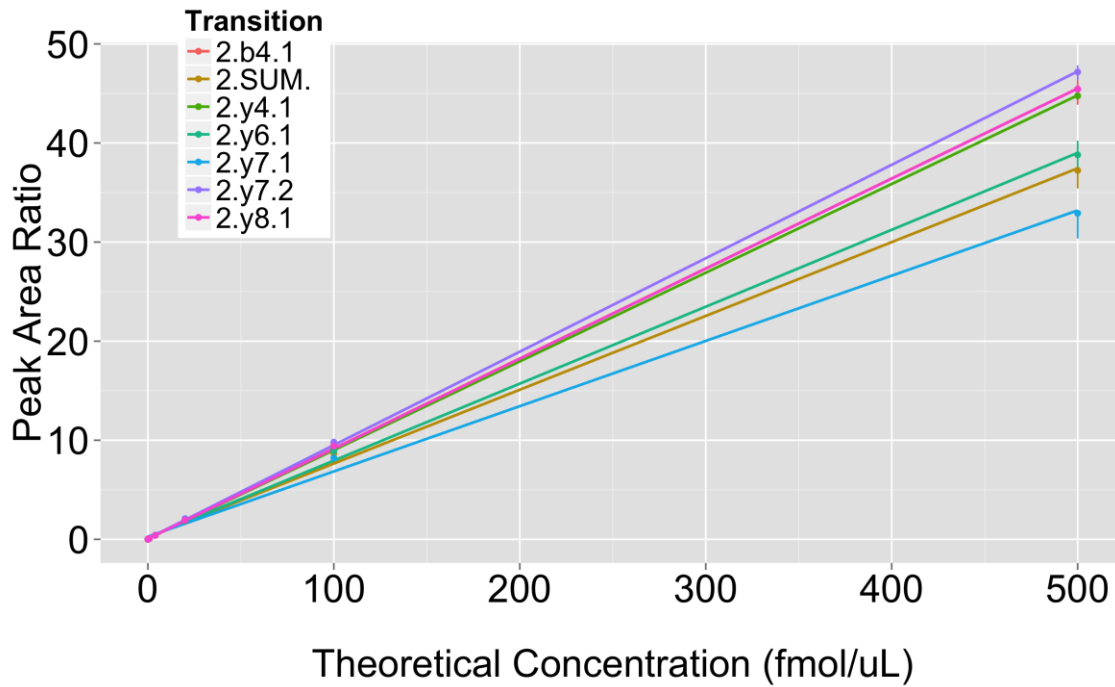

### Analyte: SAIC33B.AAEDYGVIK

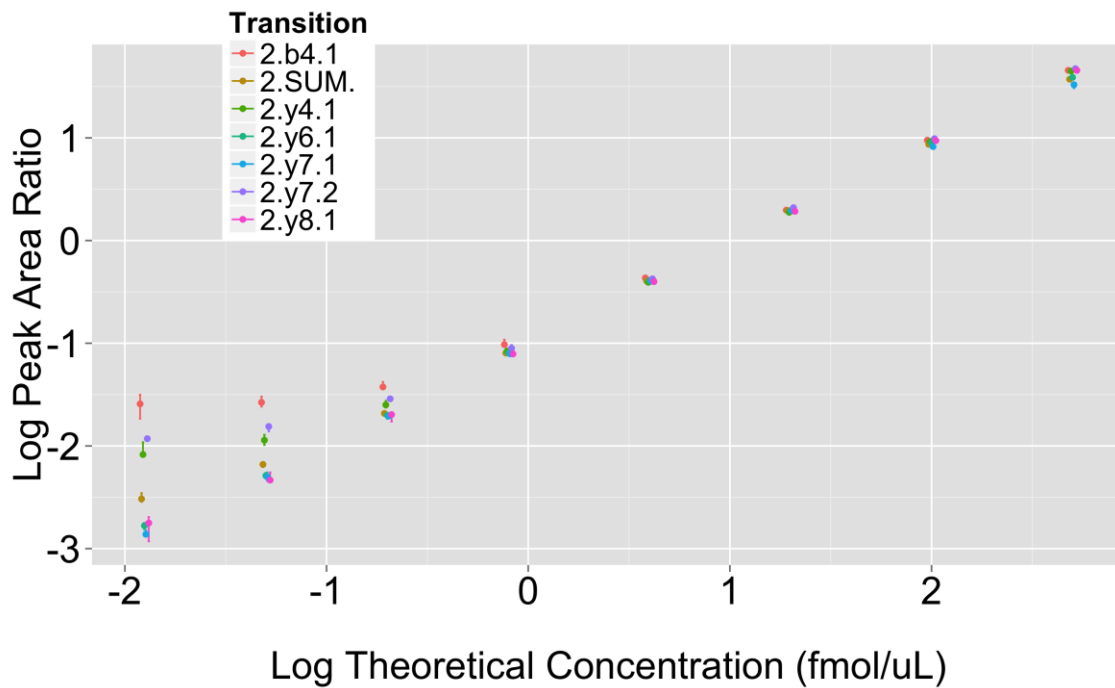

### Analyte: SAIC34B.LSEDYGVLK

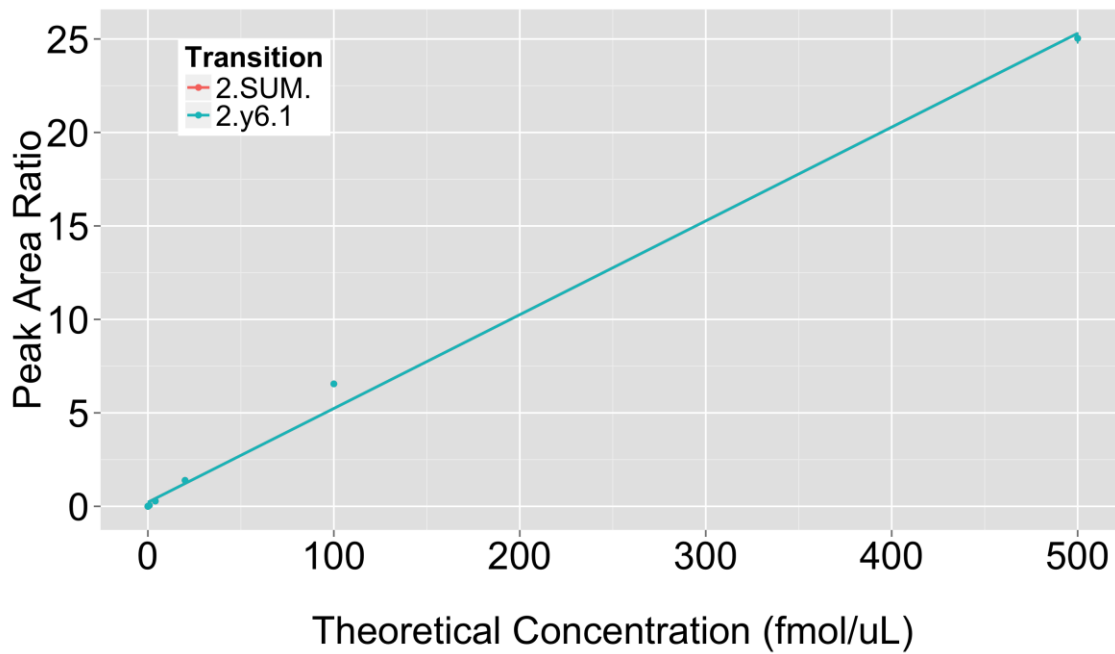

### Analyte: SAIC34B.LSEDYGVLK

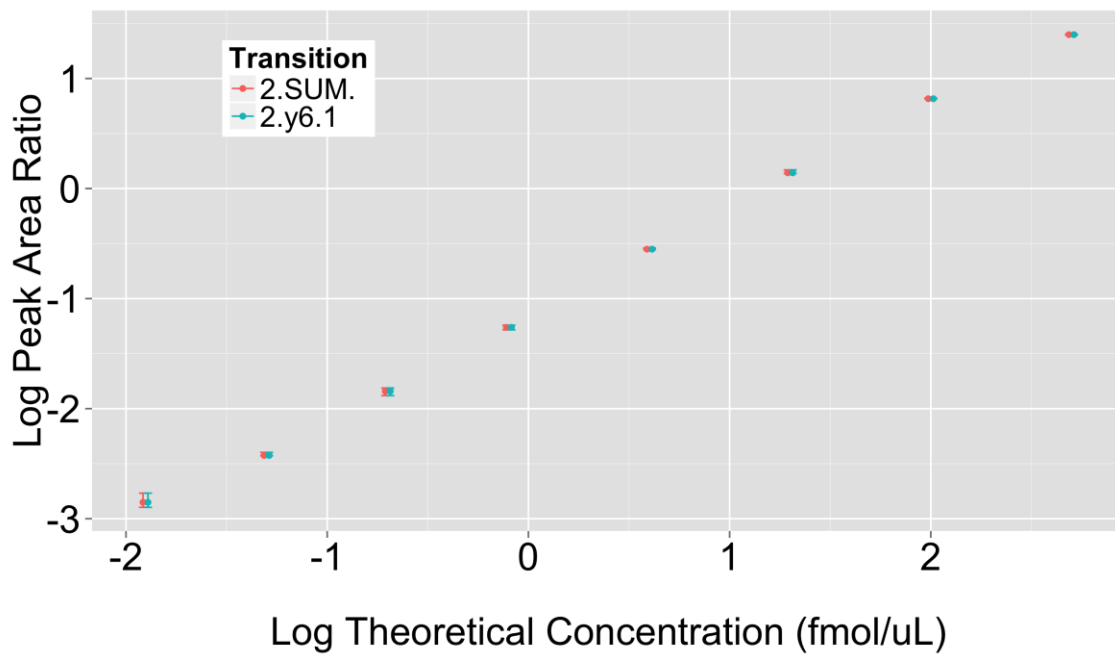

### Analyte: SAIC34D.GLFIIDGK

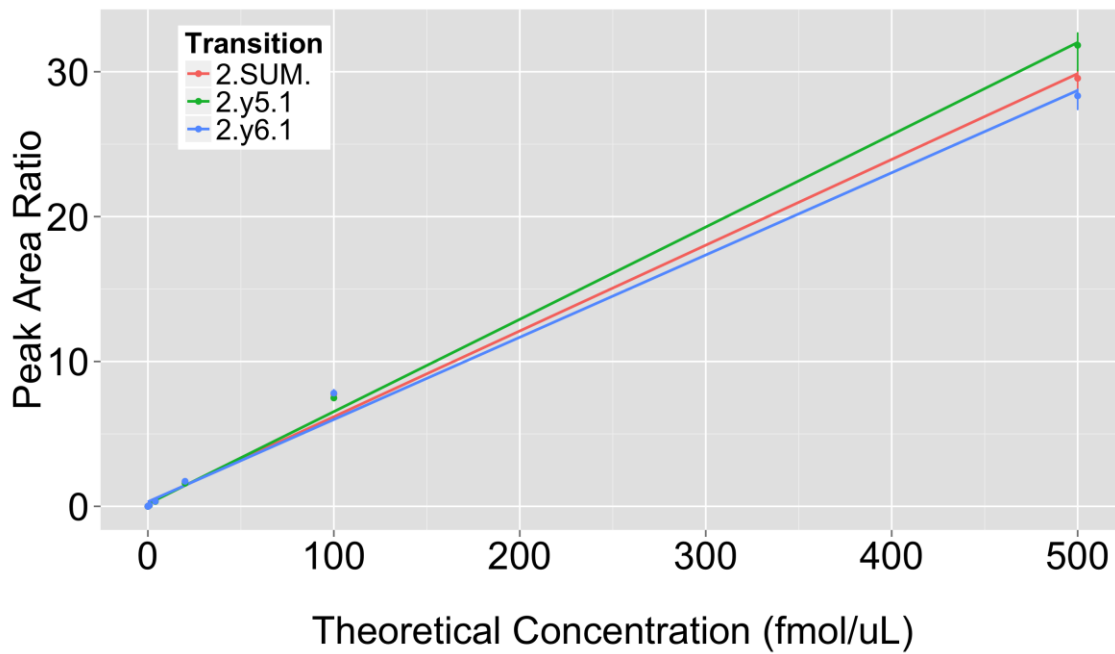

### Analyte: SAIC34D.GLFIIDGK

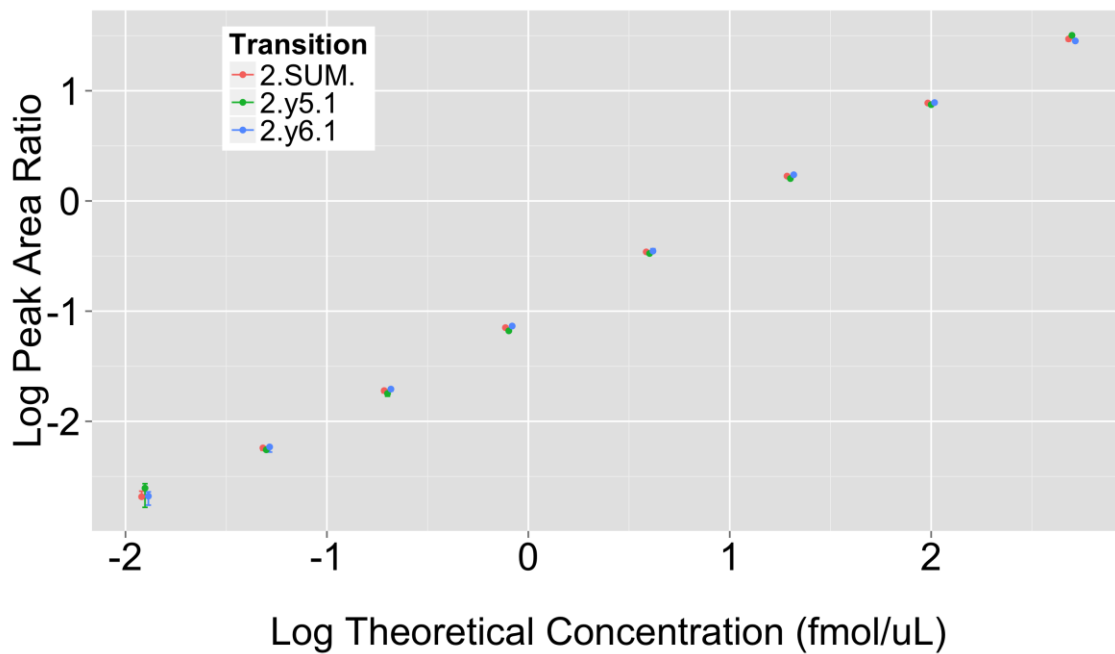

### Analyte: SAIC36A.DHPFGFVAVPTK

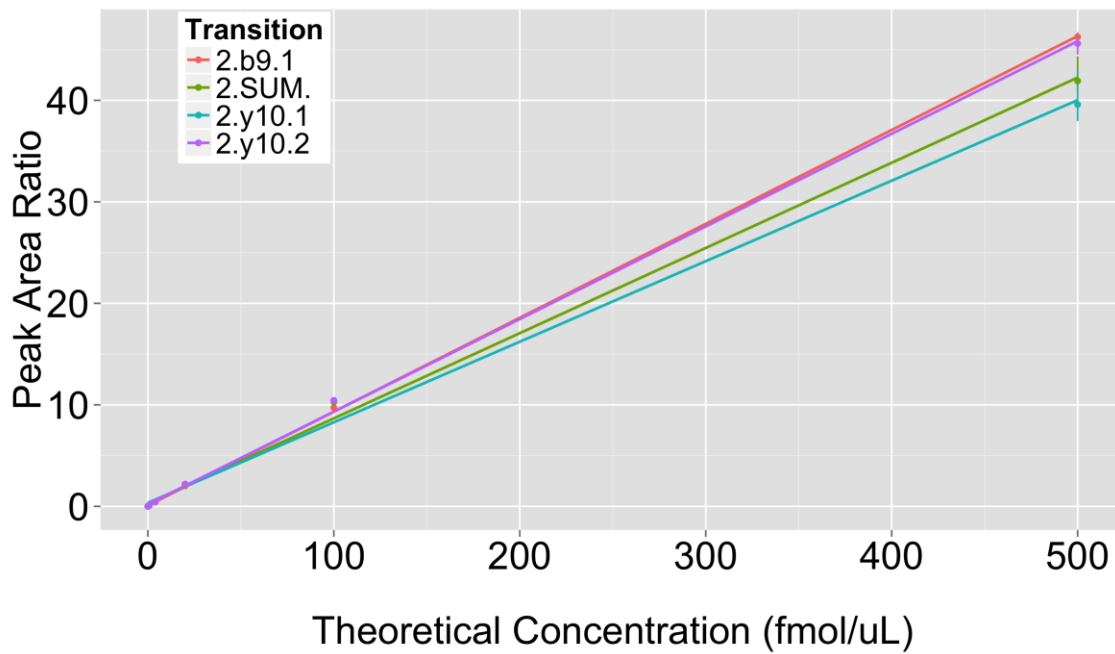

### Analyte: SAIC36A.DHPFGFVAVPTK

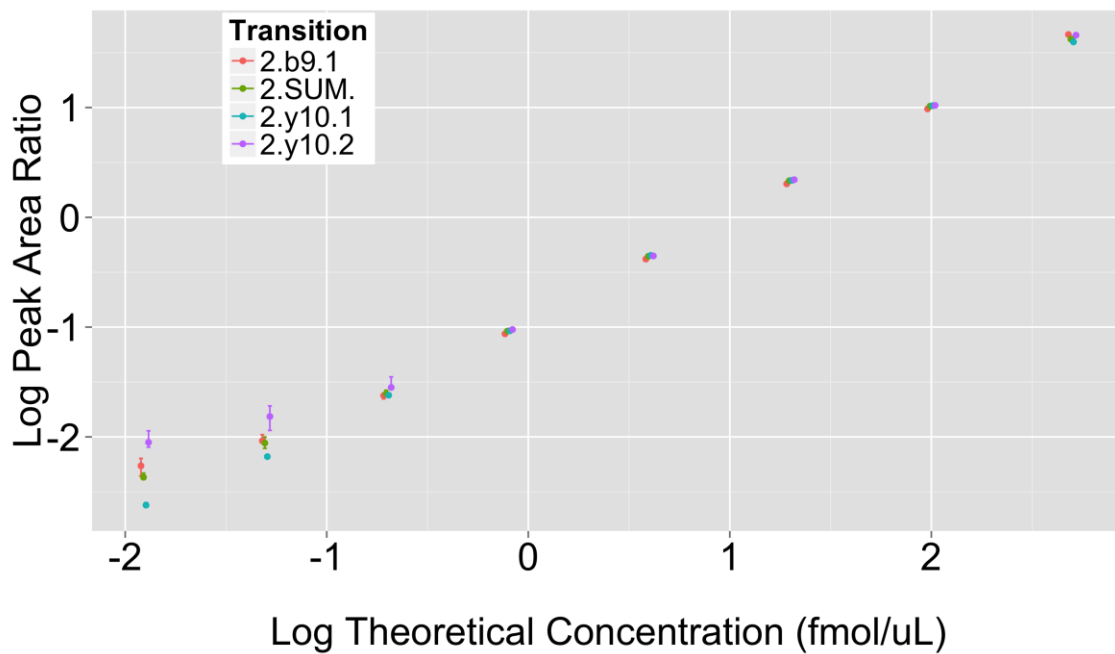

### Analyte: SAIC37C.SGYLSSER

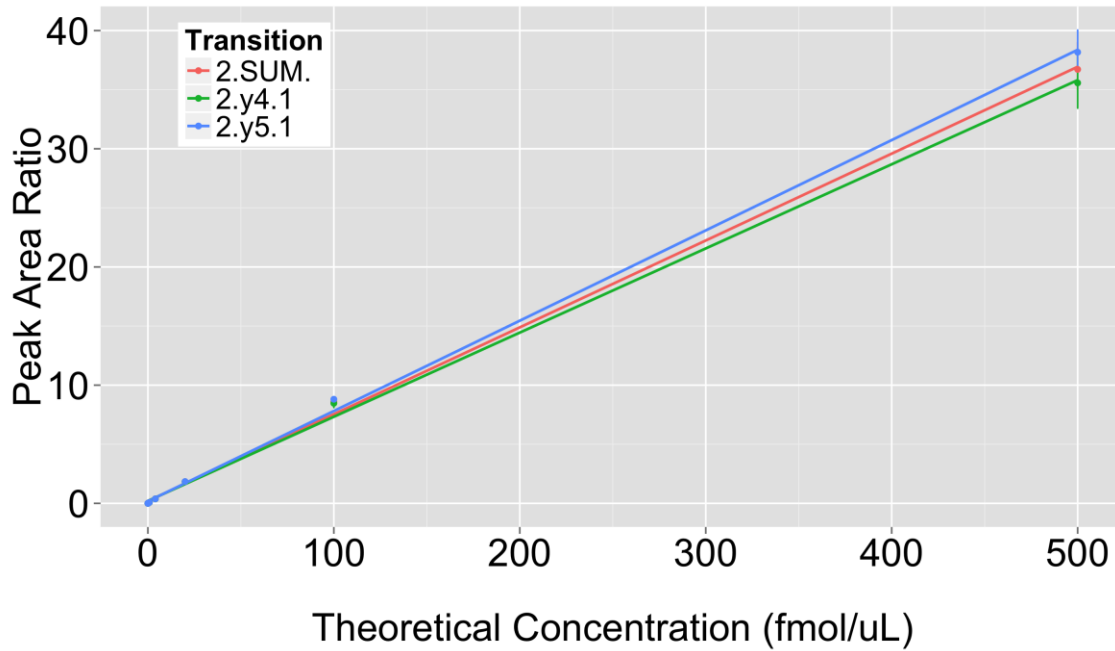

### Analyte: SAIC37C.SGYLSSER

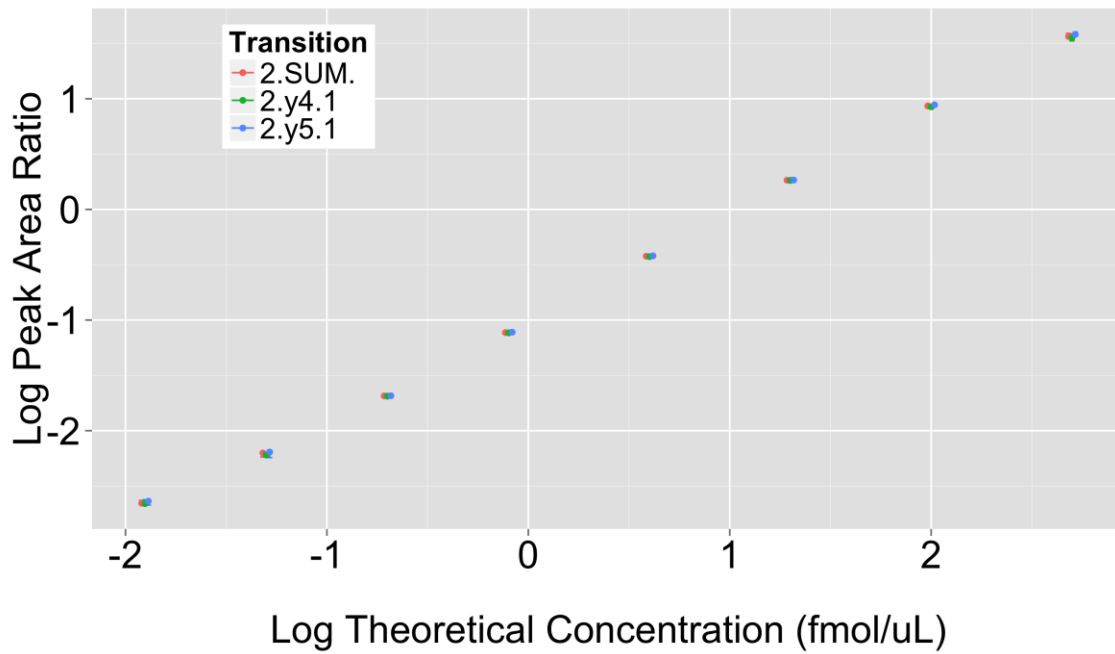

### Analyte: SAIC40A.QITLNDLPVGR

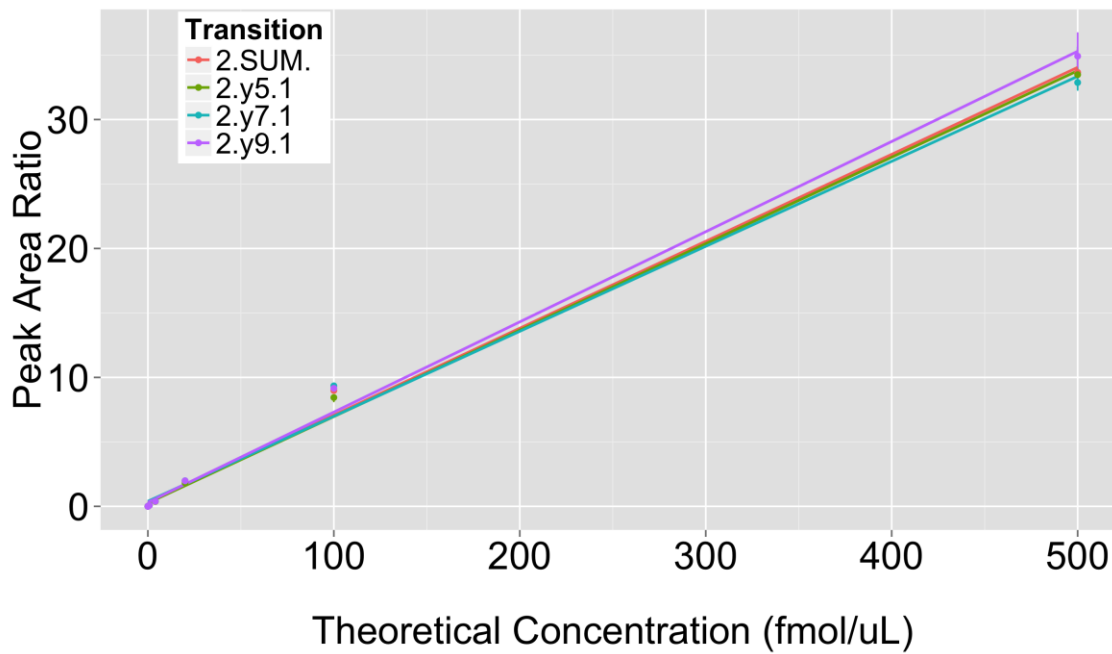

### Analyte: SAIC40A.QITLNDLPVGR

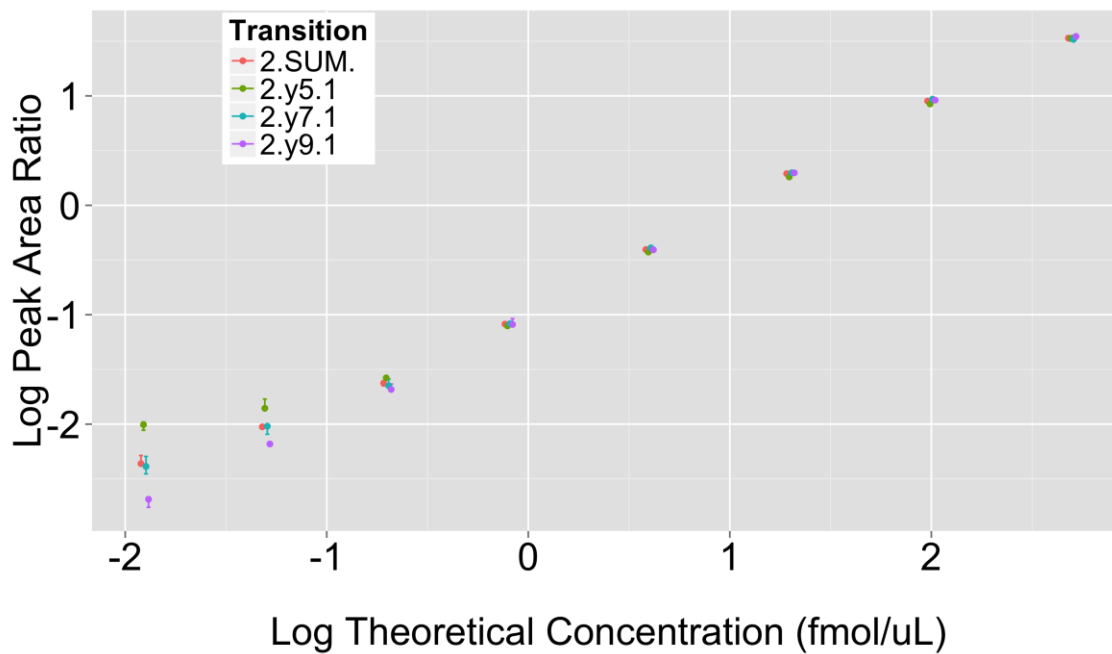



### Analyte: SAIC40C.LVQAFQYTDK

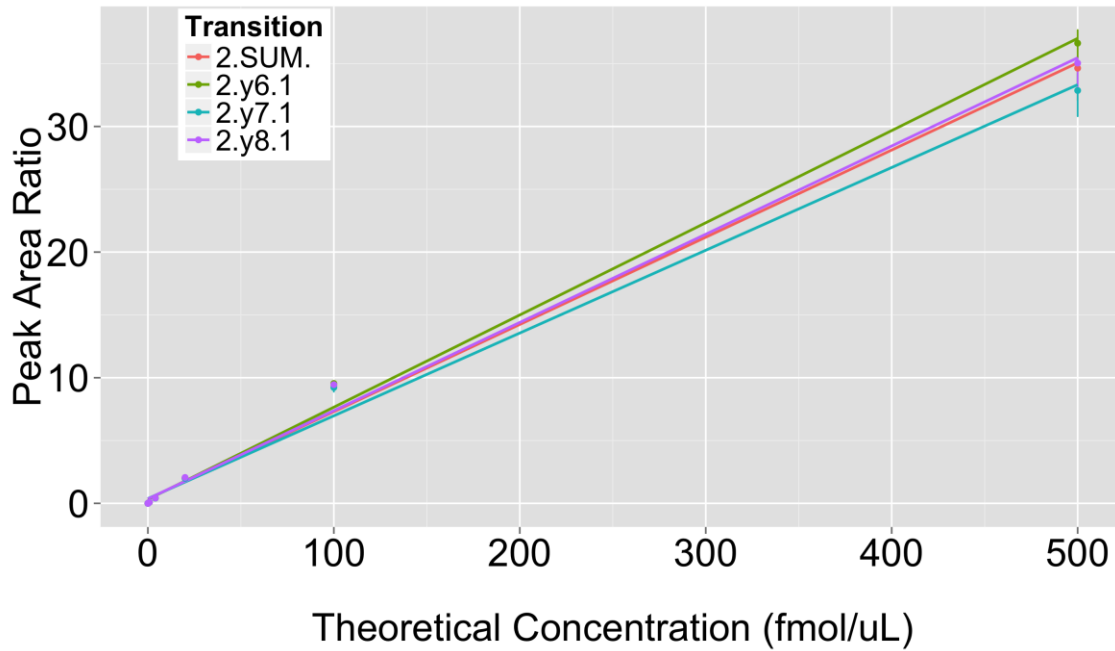

### Analyte: SAIC40C.LVQAFQYTDK

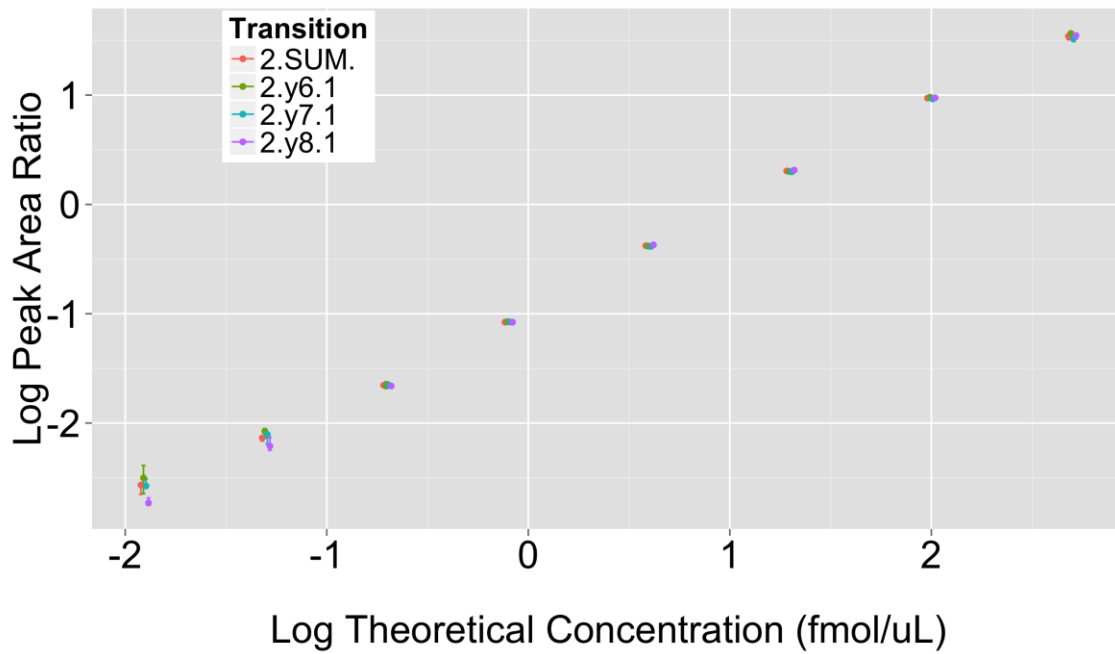

### Analyte: SAIC41A.GISAFPESDNLFK

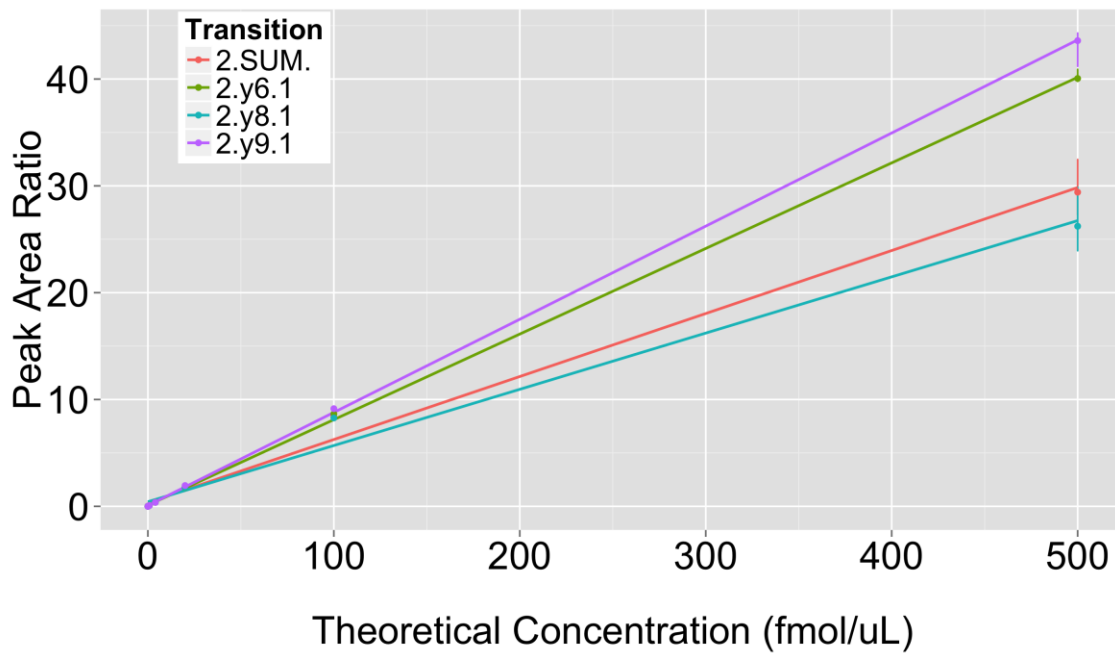

### Analyte: SAIC41A.GISAFPESDNLFK

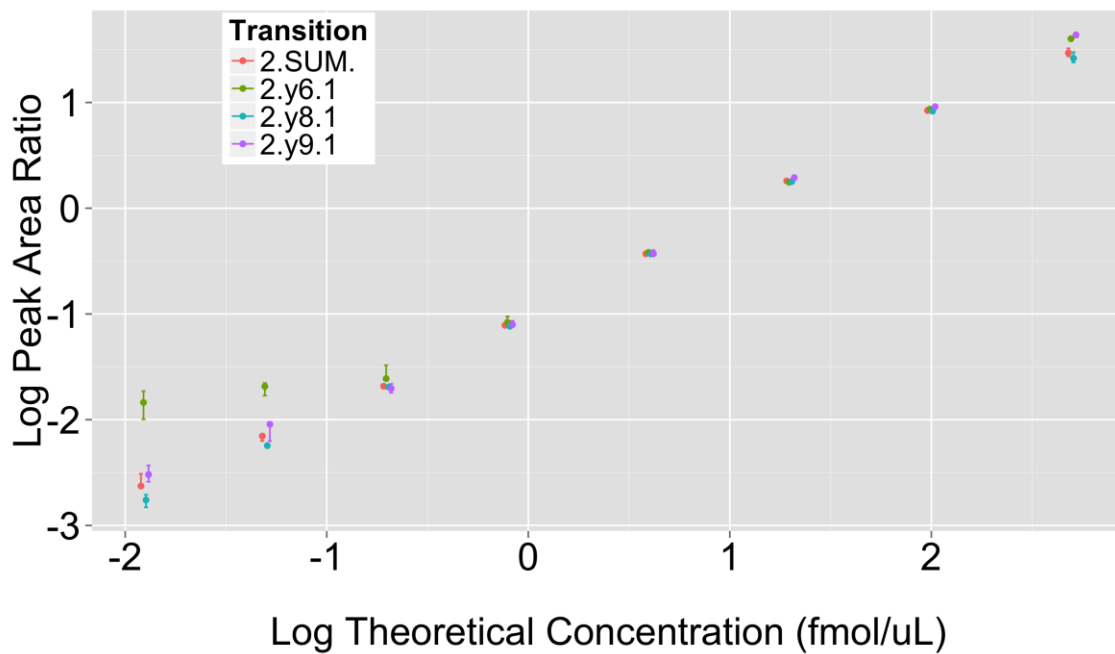

### Analyte: SAIC41C.LSLEFPSGYPNAPTVK

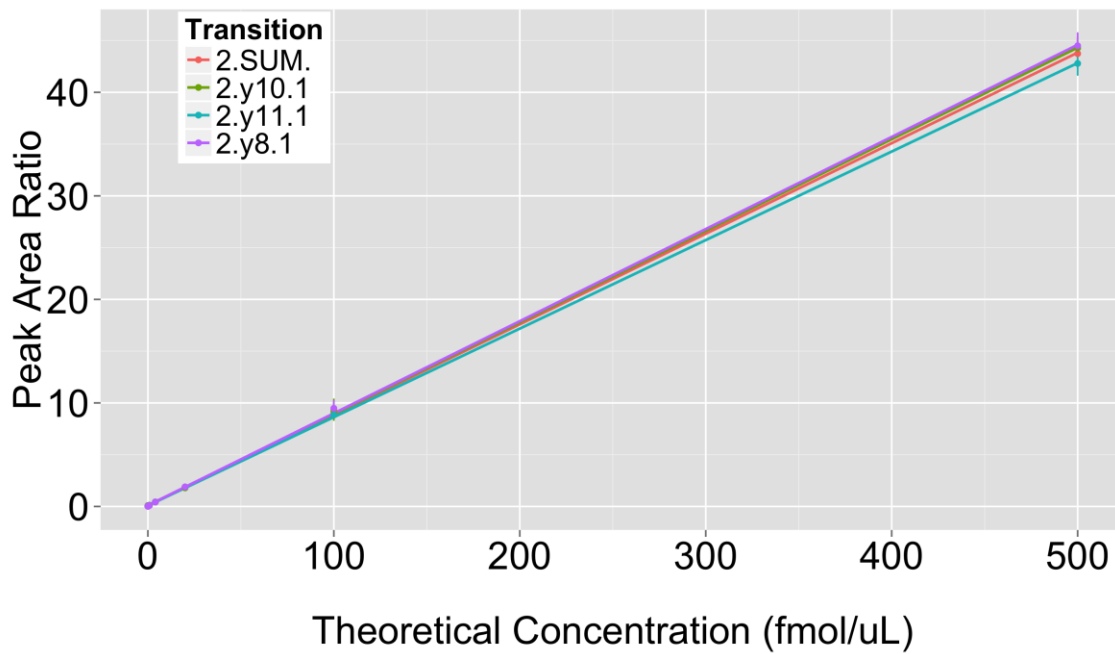

### Analyte: SAIC41C.LSLEFPSGYPNAPTVK

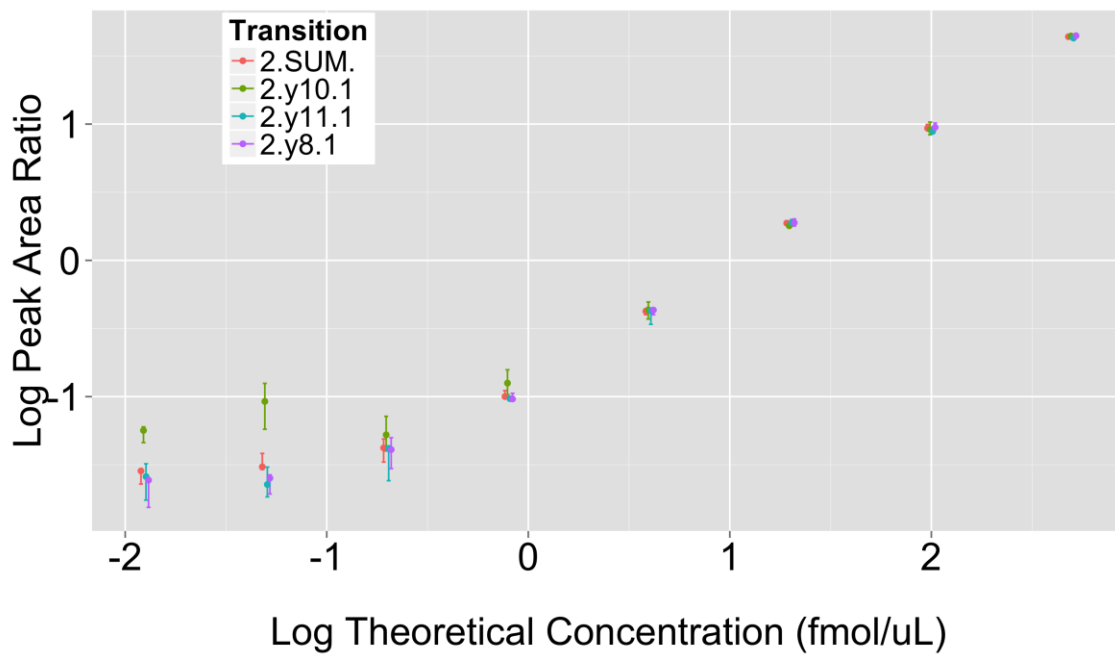

### Analyte: SAIC42B.AQLLQGLGFNLTER

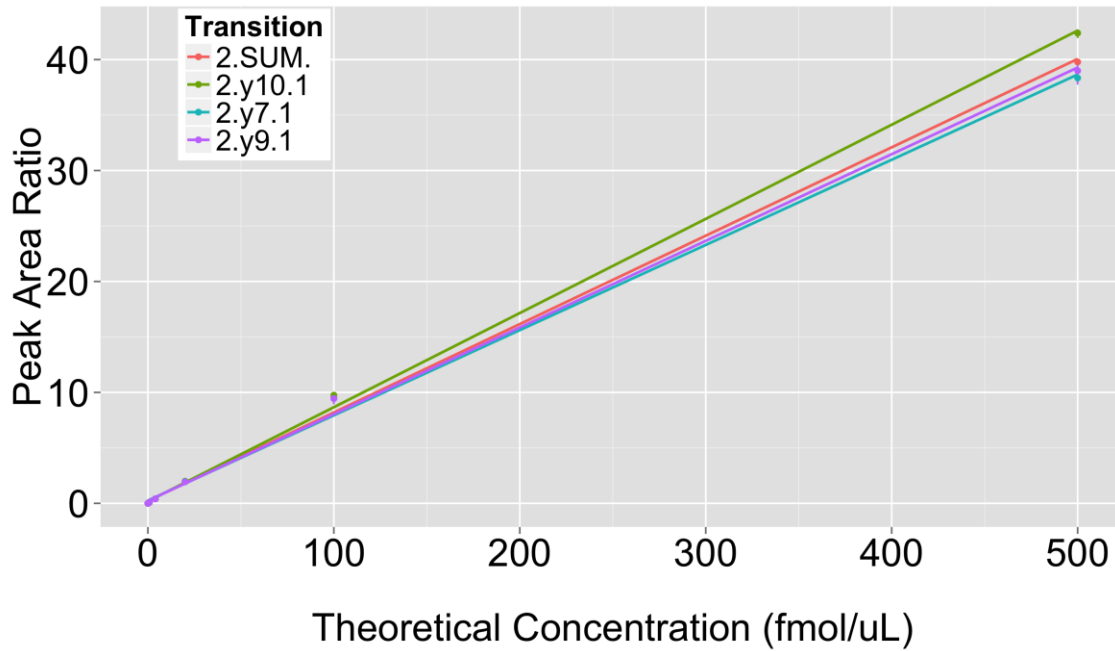

### Analyte: SAIC42B.AQLLQGLGFNLTER

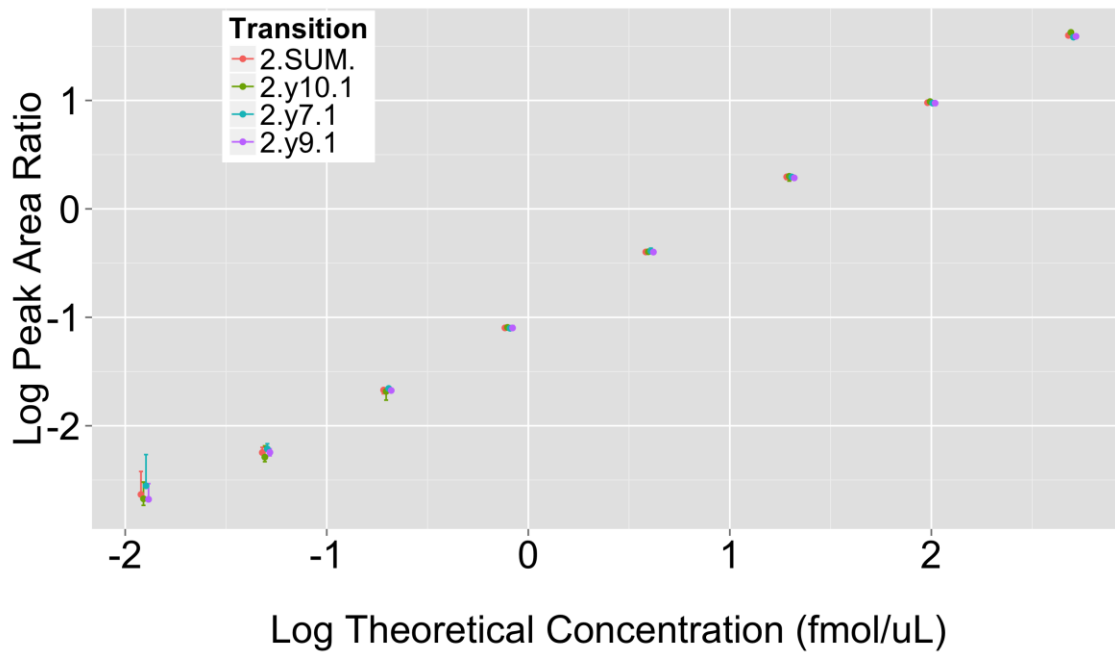

### Analyte: SAIC43B.ASSIIDELFQDR

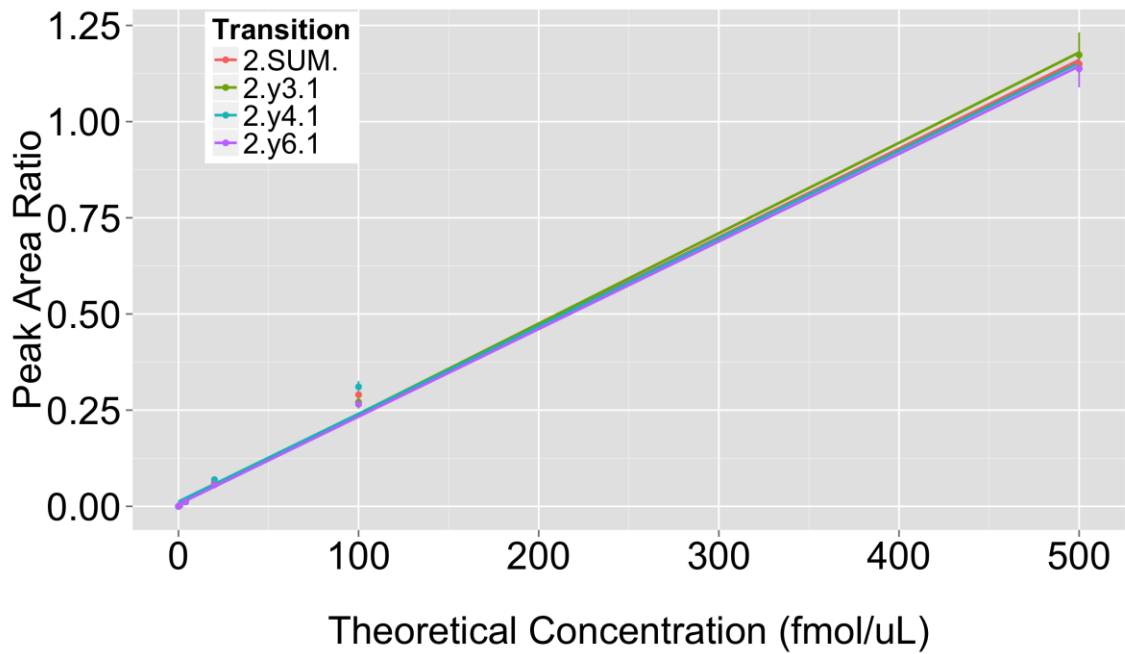

### Analyte: SAIC43B.ASSIIDELFQDR

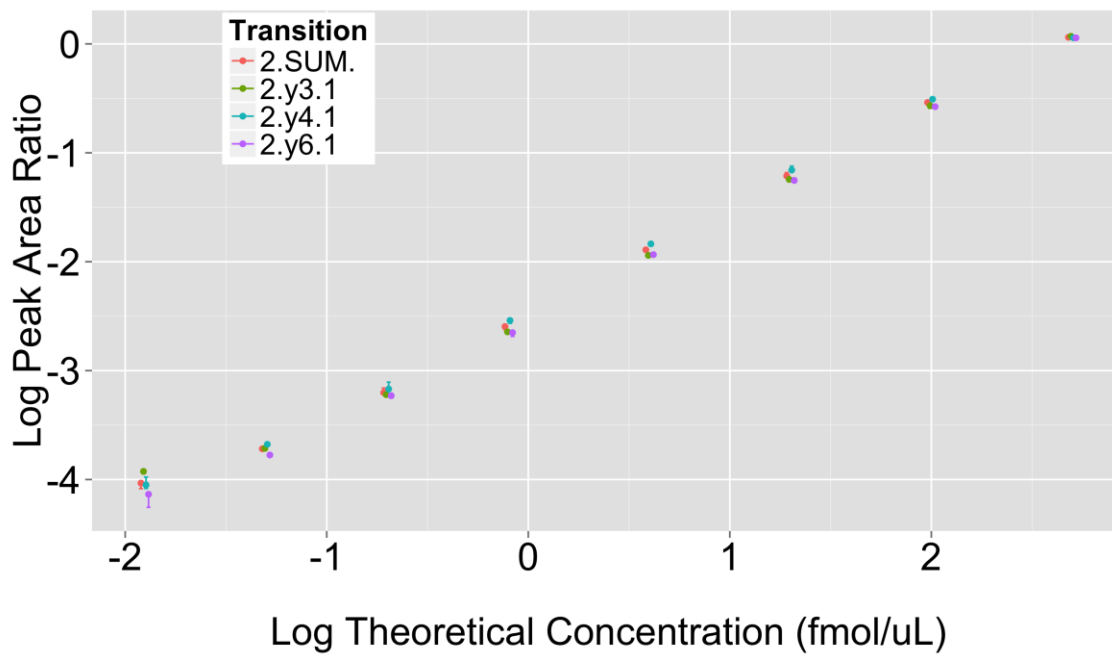

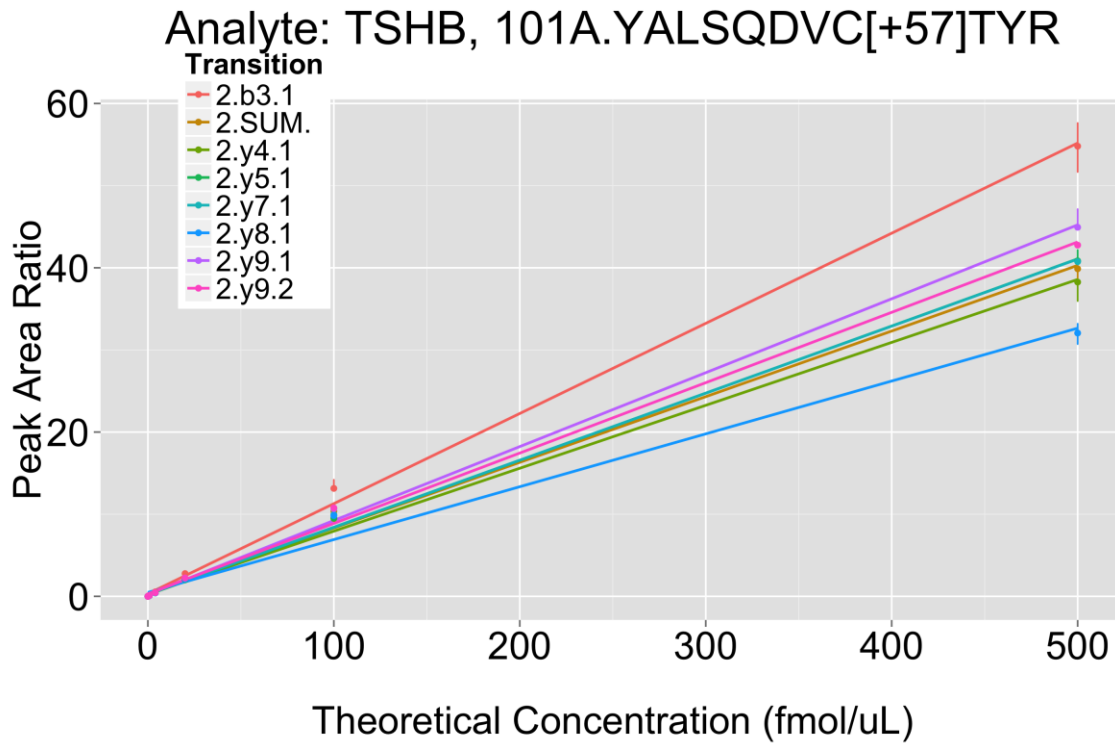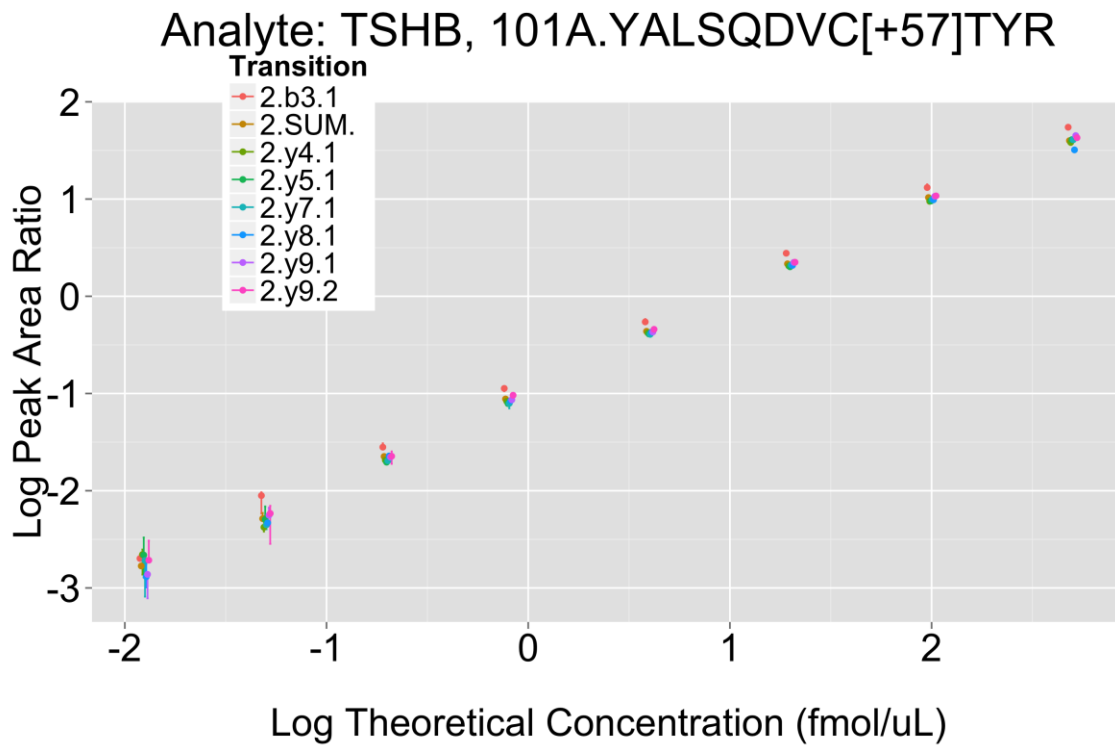

### Analyte: TSHB, 101D.SYLVGFSV

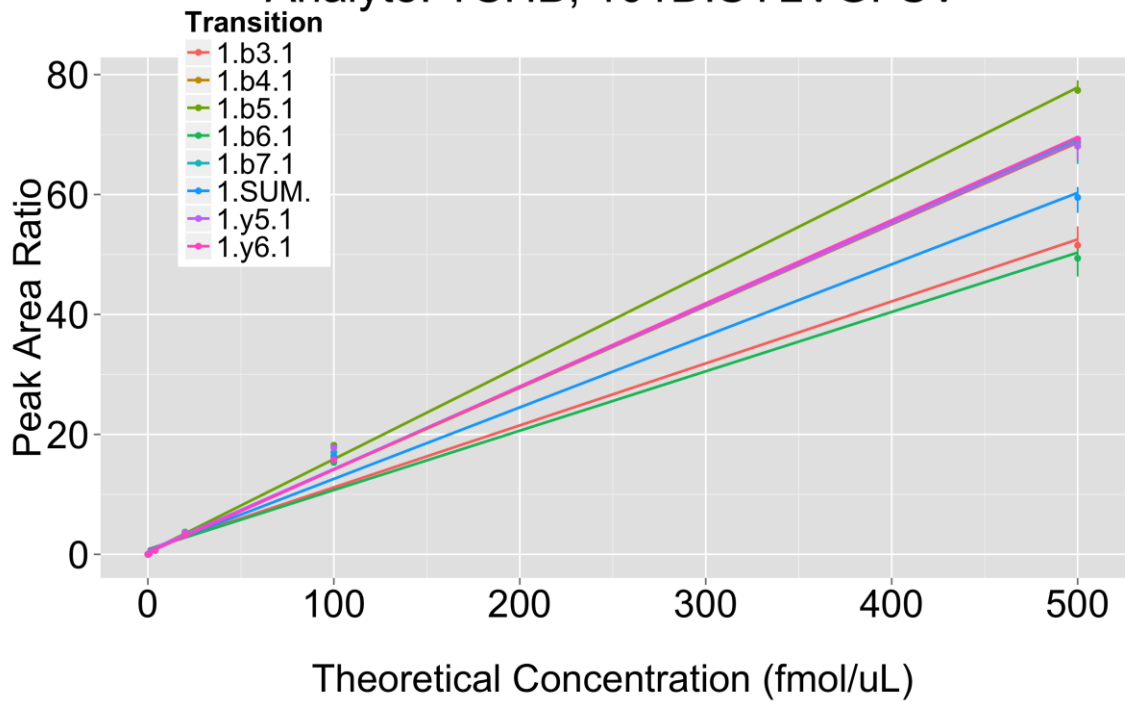

### Analyte: TSHB, 101D.SYLVGFSV

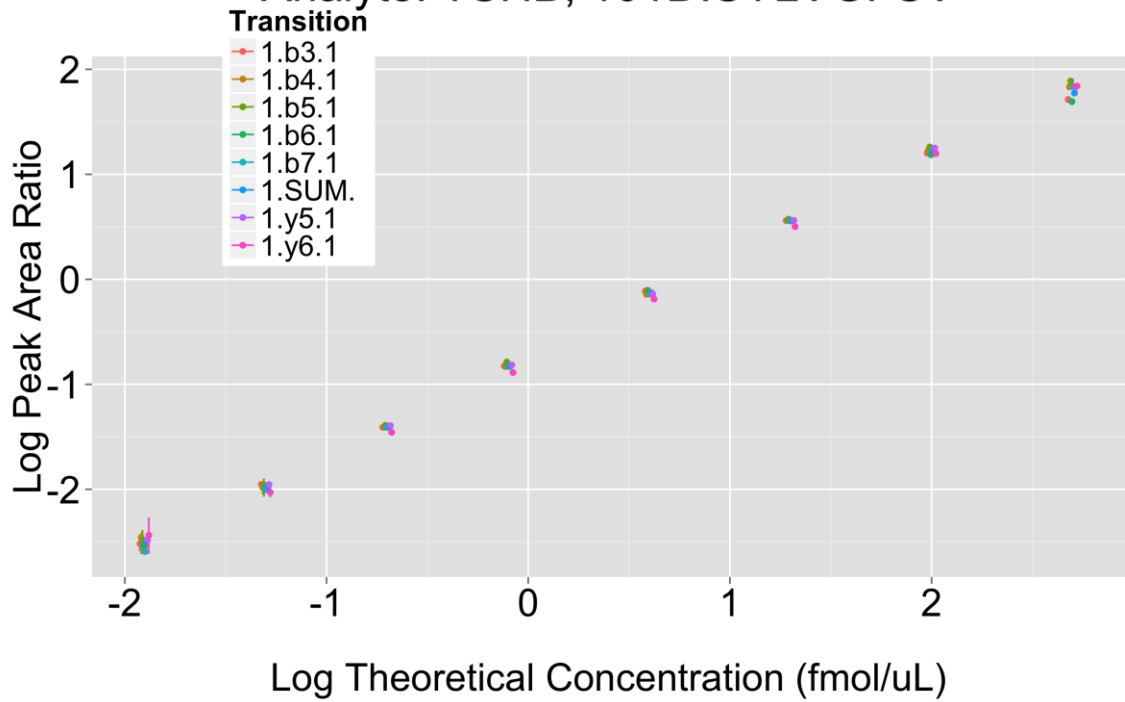

Analyte: CGB\*, 102A.VLQGVLPALPQVVC[+57]NYR

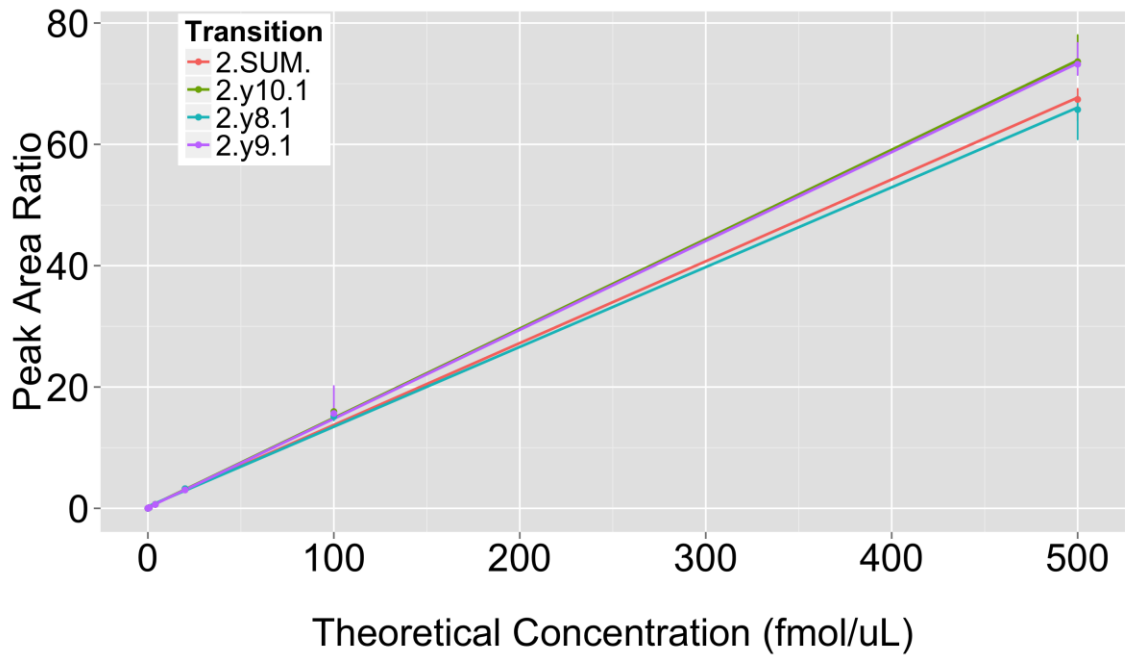

Analyte: CGB\*, 102A.VLQGVLPALPQVVC[+57]NYR

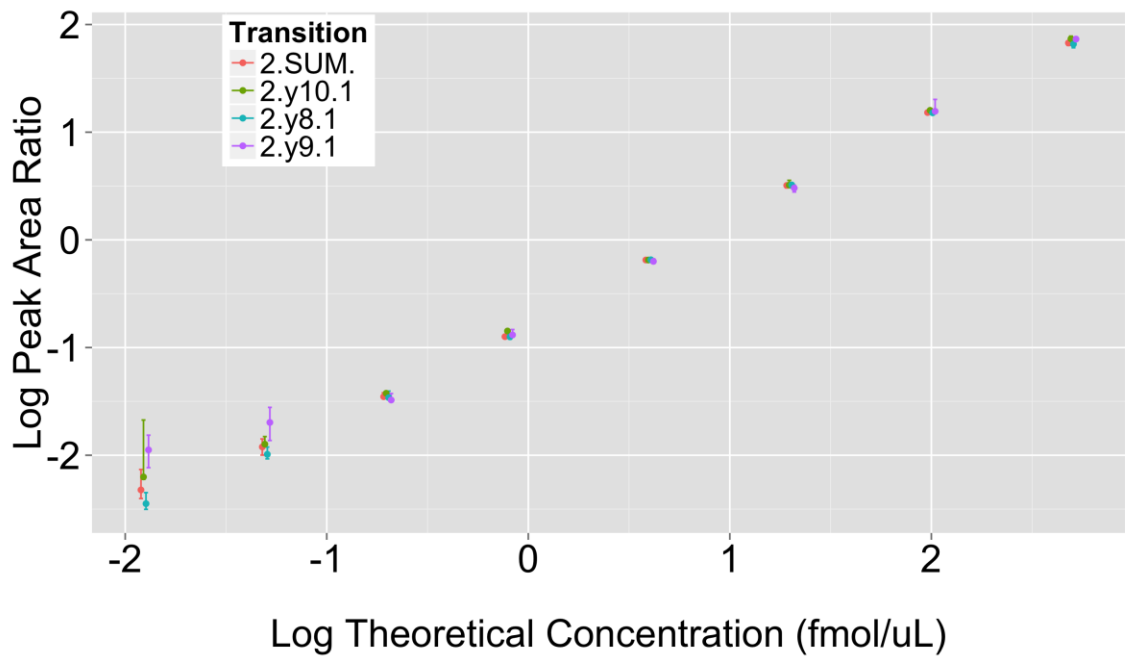



### Analyte: MUC1, 103A.EGTINVHDTVETQFNQYK

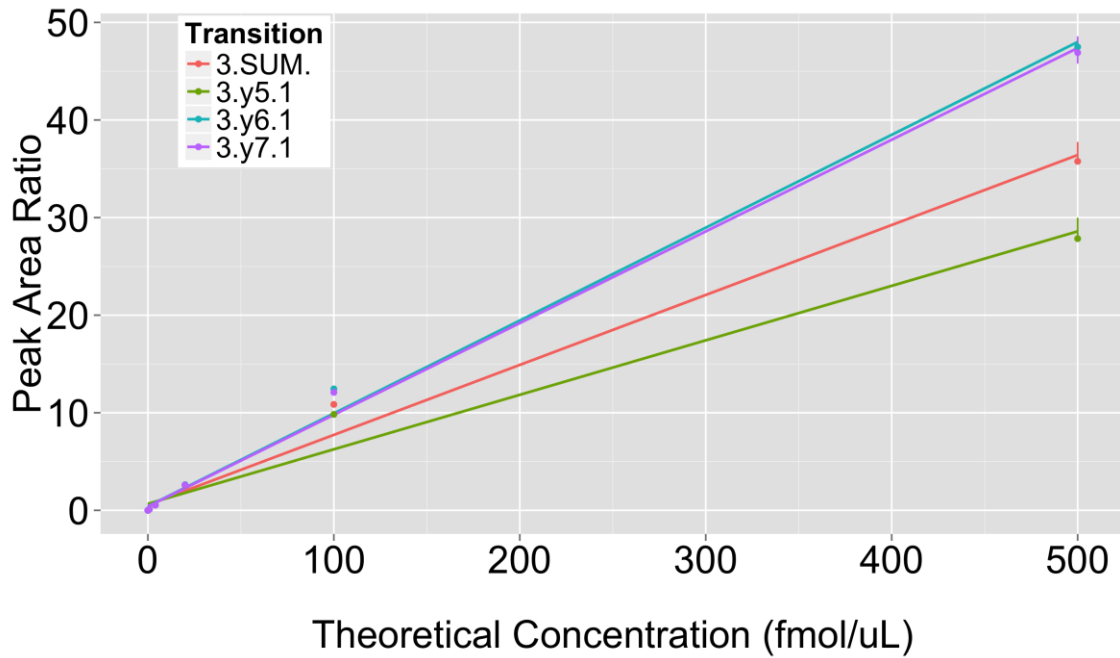

### Analyte: MUC1, 103A.EGTINVHDTVETQFNQYK

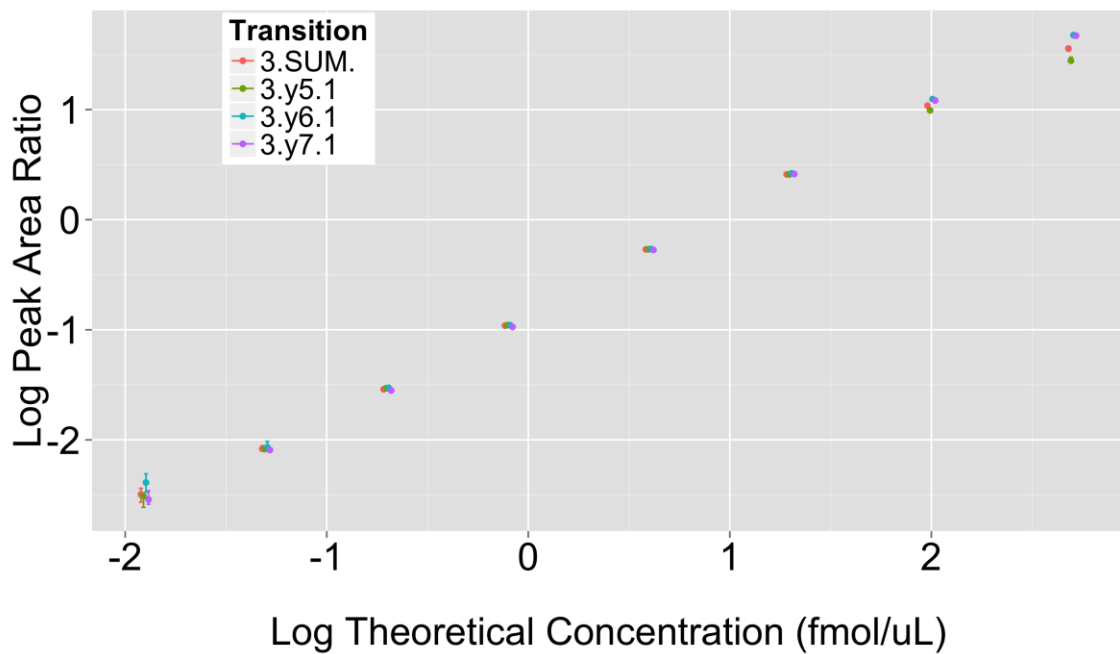

### Analyte: MUC1, 103b.NYGQLDIFPAR

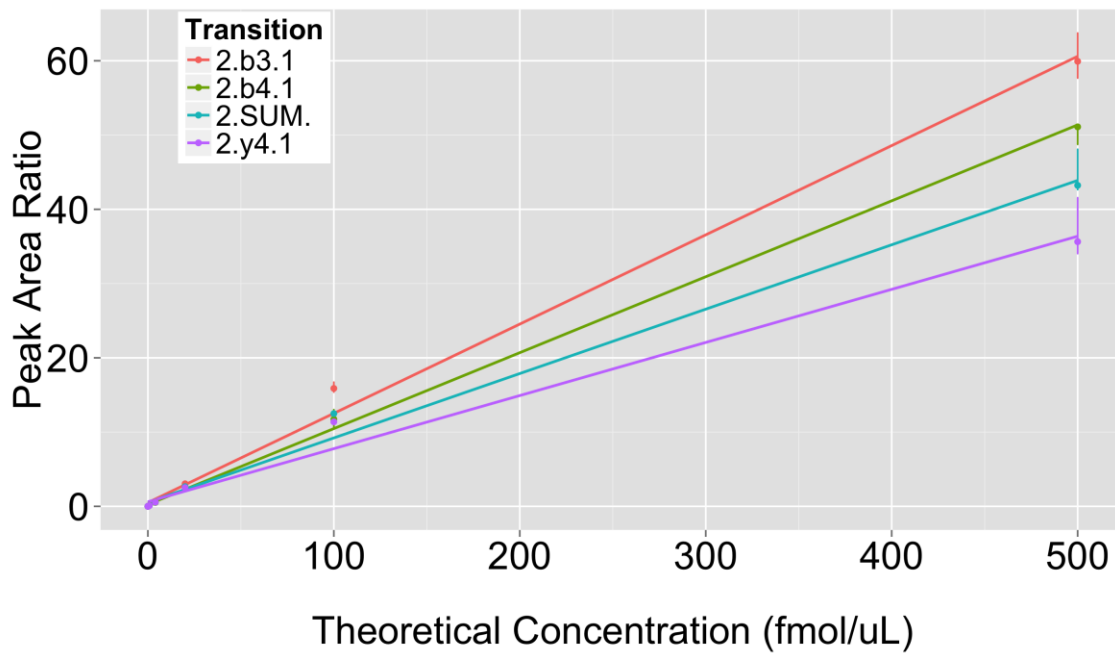

### Analyte: MUC1, 103b.NYGQLDIFPAR

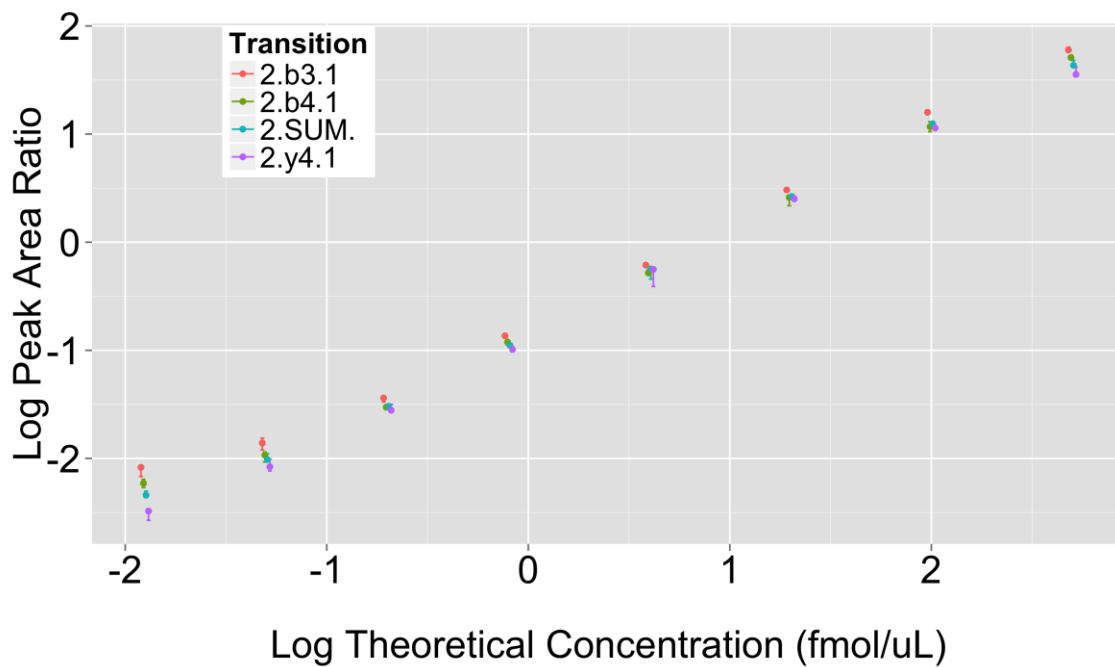

Supplement: supp_O114.043133_mcp.O114.043133-2.pdf [file supp_O114.043133_mcp.O114.043133-2.pdf]
