# Supplementary material
Source: PubMed Central journal article supplement (PMC4350033)

**Supplemental Figure 4. ELISA data from screening recombinant monoclonal antibodies using recombinant proteins or overexpressed lysates.** ELISA data were reduced using Prism™ software to calculate the 50% binding point ( $B_{50\%}$ ). Specifically, a 4-parameter logistic fit (4PL) was applied to the data to calculate the upper and lower asymptotes along with a slope and a mid-point of the curve (the EC50 or  $B_{50\%}$ , which is the inflection point of the curve and represents the antibody concentration (or x-axis value) at half of the calculated maximum binding. The  $B_{50\%}$  values should not be interpreted as absolute numbers that define mAb performance (i.e., not analogously to affinity constants); instead, the  $B_{50\%}$  values can be used as relative values to compare the performances of the mAb within this group of mAbs.

**Table of contents (giving the target peptide ID, the gene symbol, and the target peptide sequence):**

|                                            |    |
|--------------------------------------------|----|
| SAIC-01B, CD44, TFIPVTS AK.....            | 2  |
| SAIC-02A, ERBB2, GLQSLPTHDP S PLQR.....    | 3  |
| SAIC-07B, XPNPEP1, GSLTFEPLTLVPIQTK.....   | 4  |
| SAIC-07E, XPNPEP1, T LSLDEVYLIDSGAQYK..... | 5  |
| SAIC-14C, ANXA4, DEGNYLDDALVR .....        | 6  |
| SAIC-16D, CALR, GLQTSQDAR .....            | 7  |
| SAIC-30C, RRM2, IEQEFLTEALPVK .....        | 8  |
| SAIC-30E, RRM2, DIQHWESLKP EER .....       | 9  |
| SAIC-31A, SNCG, TVEEAENIAVTSGVVR .....     | 10 |
| SAIC-33B, TAGLN, AAEDYGVIK .....           | 11 |
| SAIC-34B, PRDX2, LSEDYGV LK .....          | 12 |
| SAIC-36A, UBE2I, DHPFGFVAVPTK .....        | 13 |
| SAIC-40A, PRDX4, QITLNDLPVGR .....         | 14 |
| SAIC-40C, PRDX4, LVQAFQYTDK .....          | 15 |
| SAIC-41A, UBE2C, GISAFPESDNLFK .....       | 16 |
| SAIC-43B, CLU, ASSIIDELFQDR .....          | 17 |
| SAIC-103A, MUC1, EGTINVHDVETQFNQYK .....   | 18 |

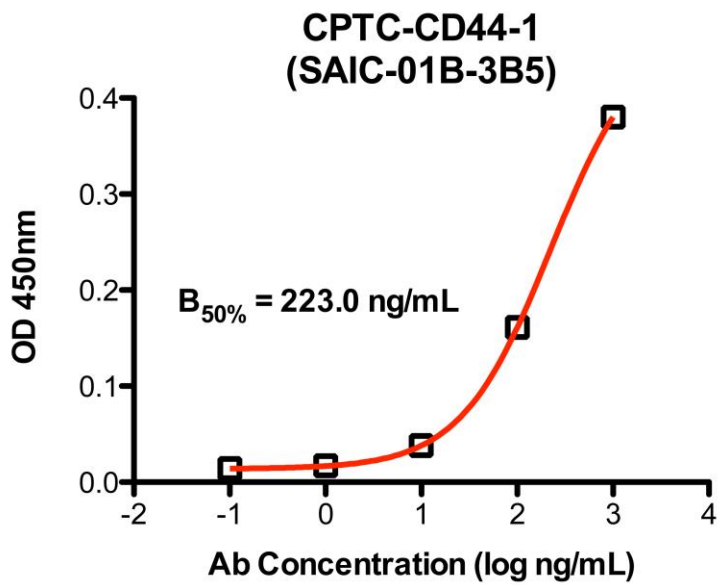

SAIC-02A, ERBB2, GLQSLPTHDPSPQLQR.

This antibody was tested using two forms of Her2 recombinant protein antigen (Ag) from Origene; variant 1 has a molecular weight of 38,000 Da, variant 2 has a molecular weight of 74,600 Da.

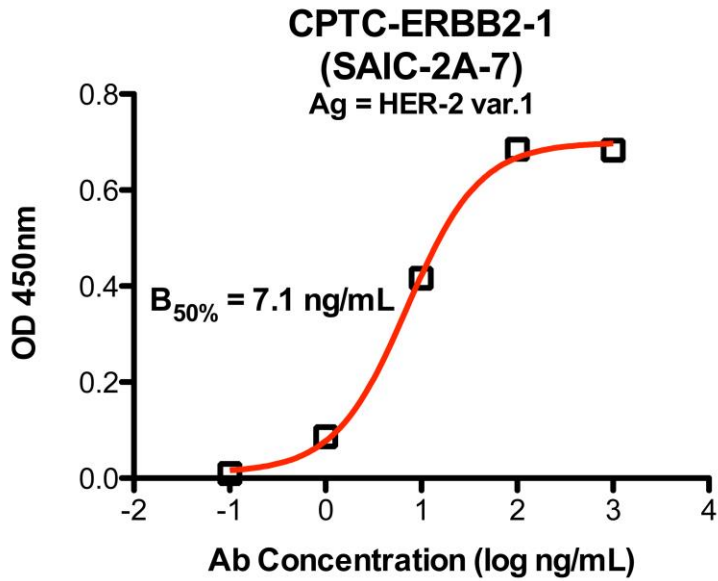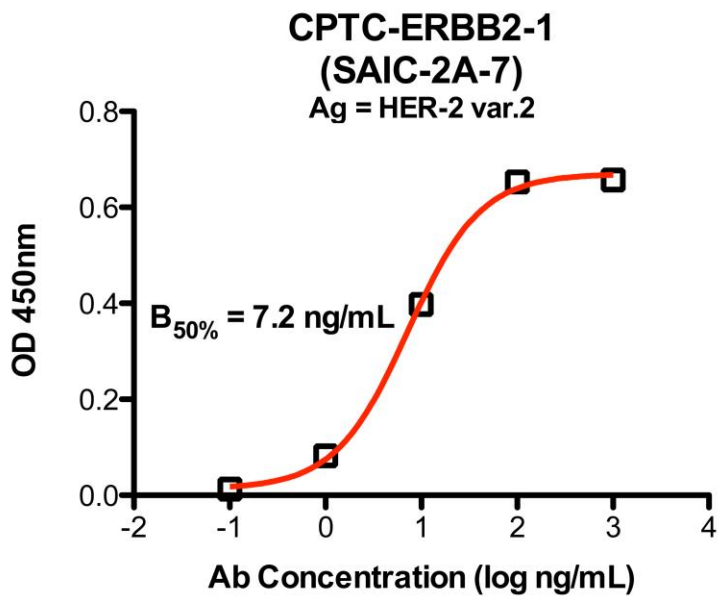

SAIC-07B, XPNPEP1, GSLTFEPLTLVPIQTK.

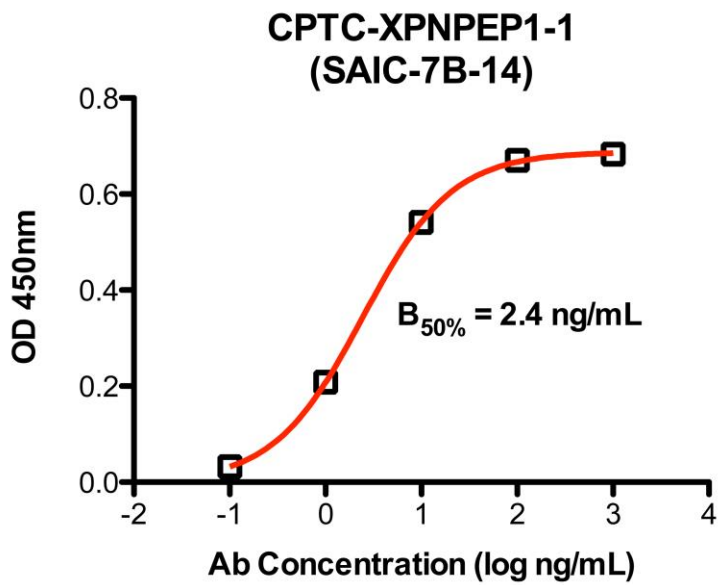

SAIC-07E, XPNPEP1, TSLDEVYLIDSGAQYK.

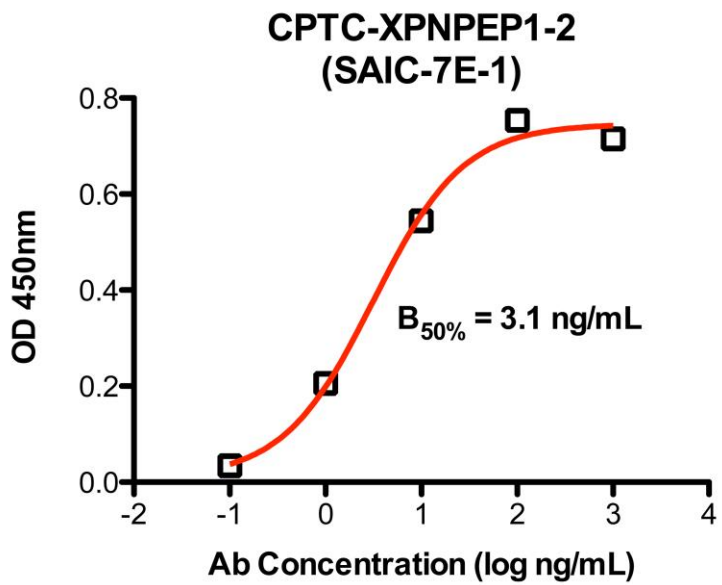

SAIC-14C, ANXA4, DEGNYLDDALVR.

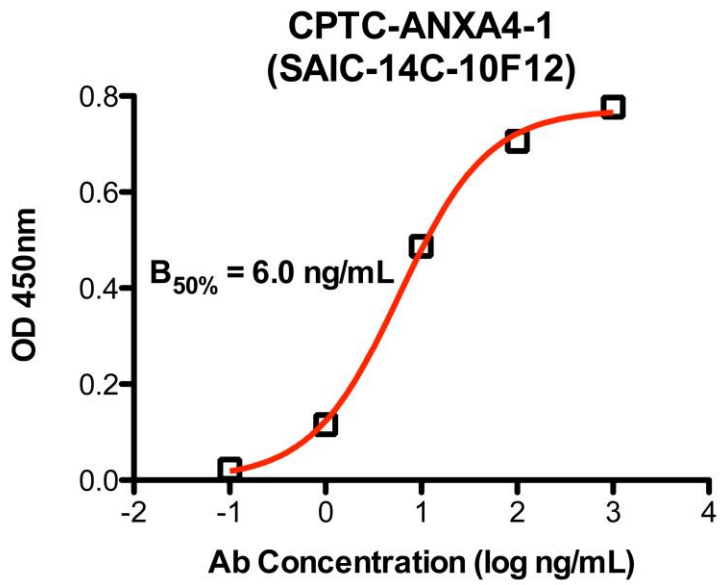

SAIC-16D, CALR, GLQTSQDAR.

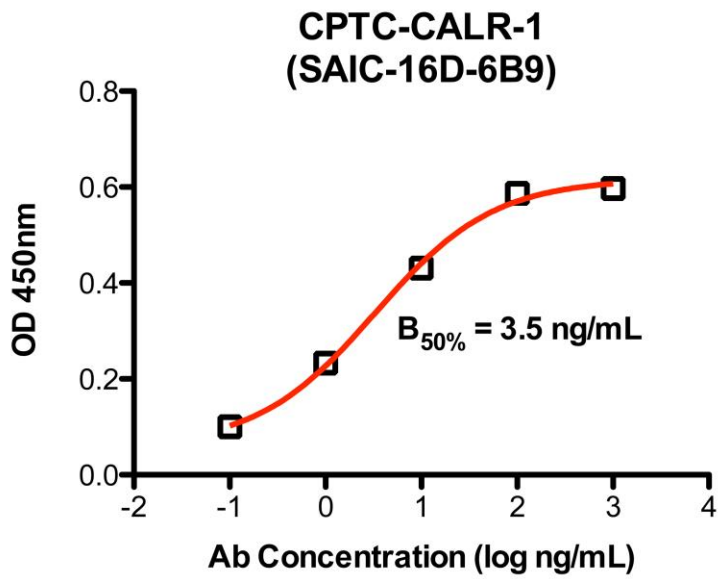

SAIC-30C, RRM2, IEQEFLTEALPVK.

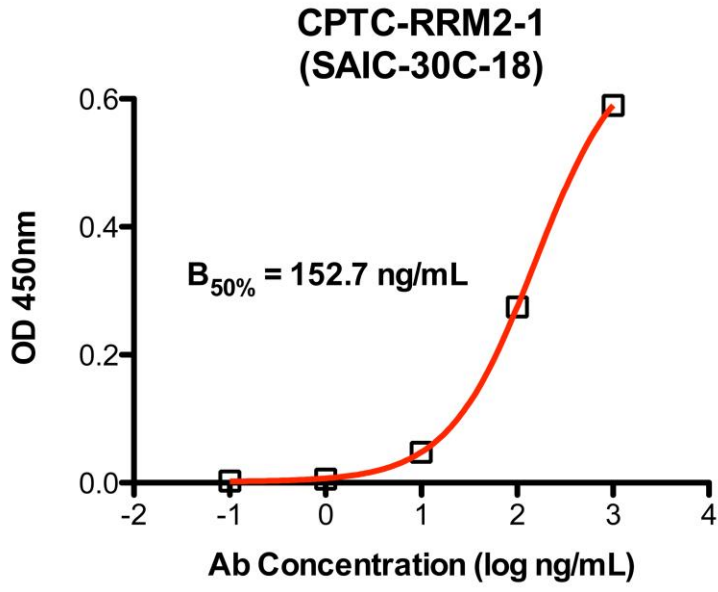



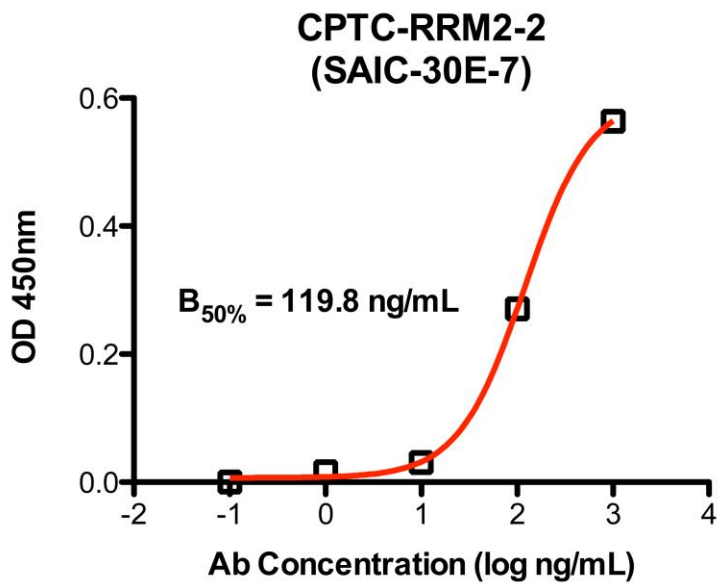

SAIC-31A, SNCG, TVEEAENIAVTSGVVR.

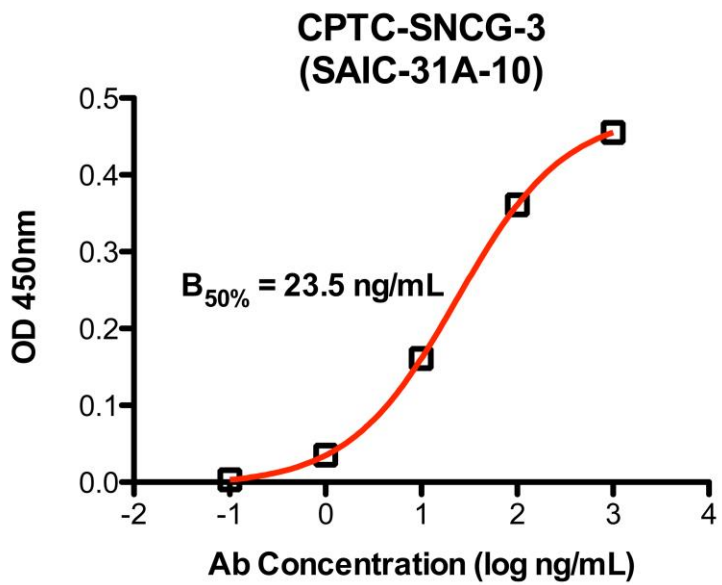

SAIC-33B, TAGLN, AAEDYGVIK.

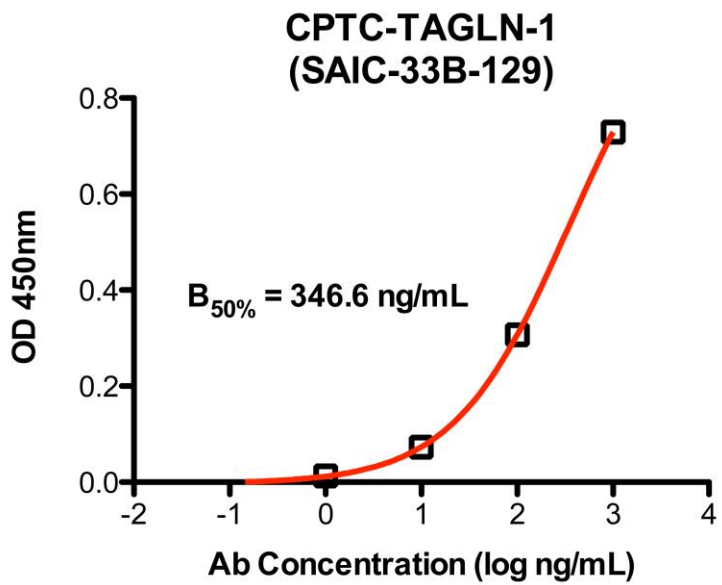

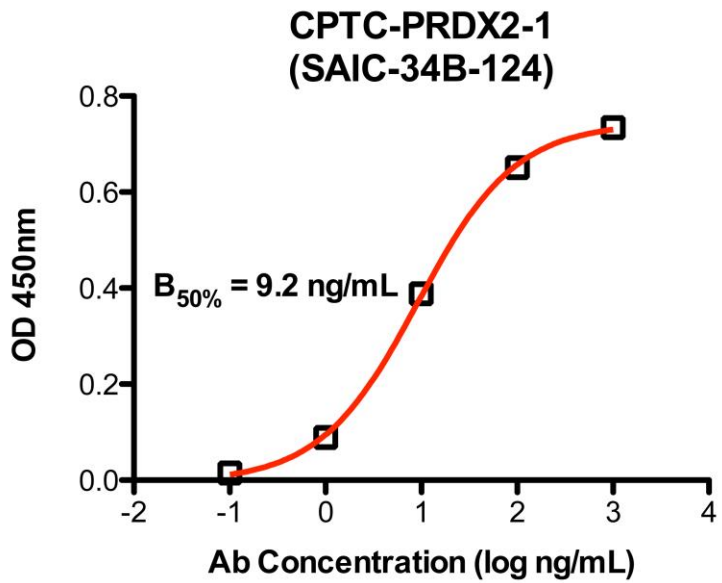

SAIC-36A, UBE2I, DHPFGFVAVPTK.

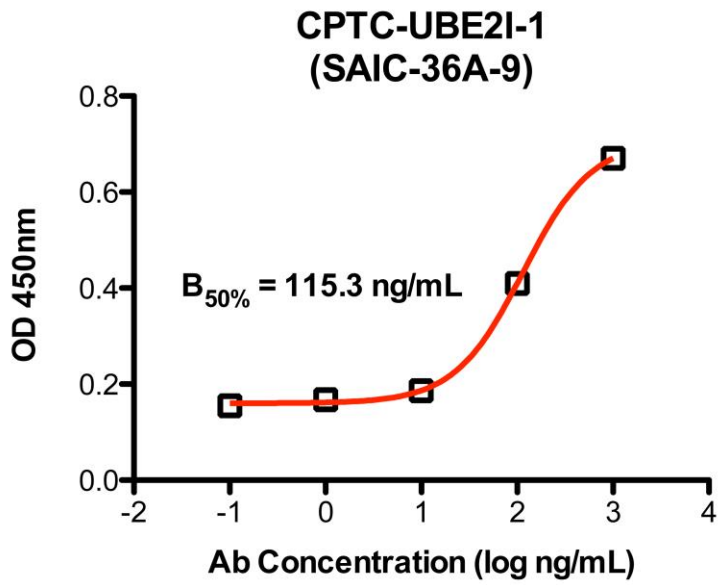

SAIC-40A, PRDX4, QITLNDLPVGR.

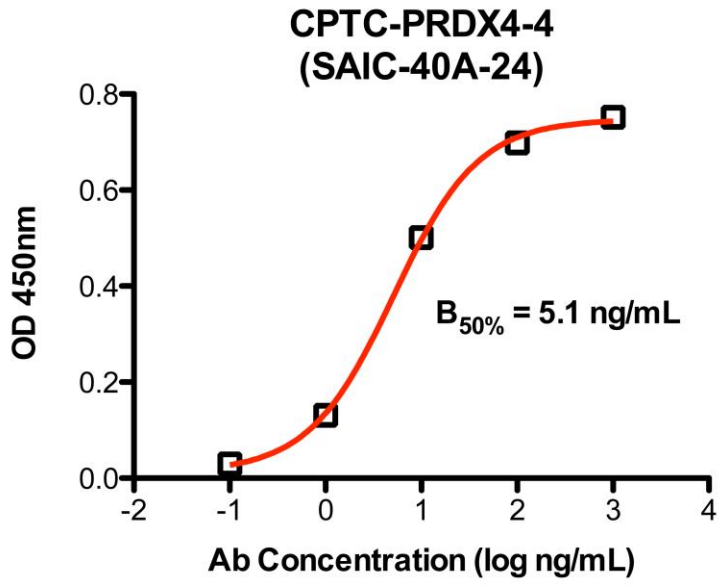

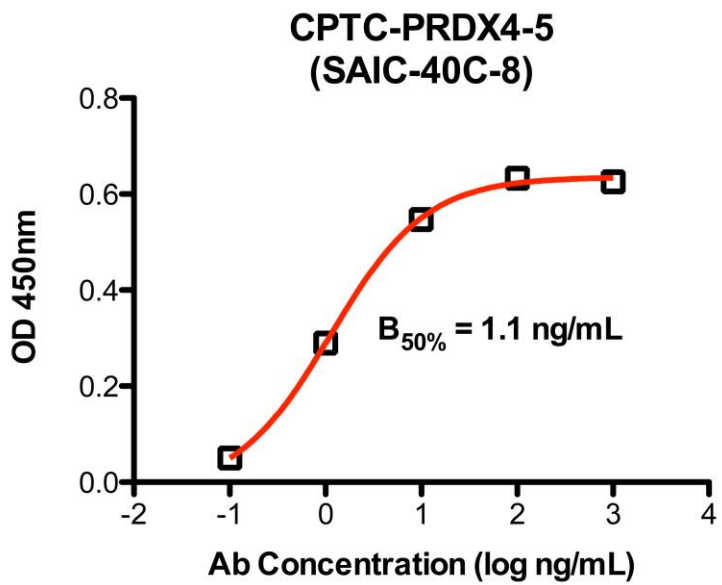

SAIC-41A, UBE2C, GISAFPESDNLFK.

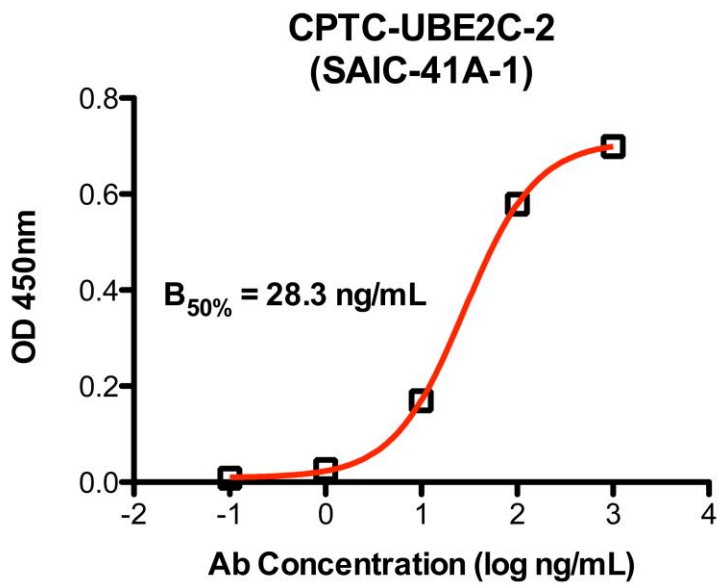



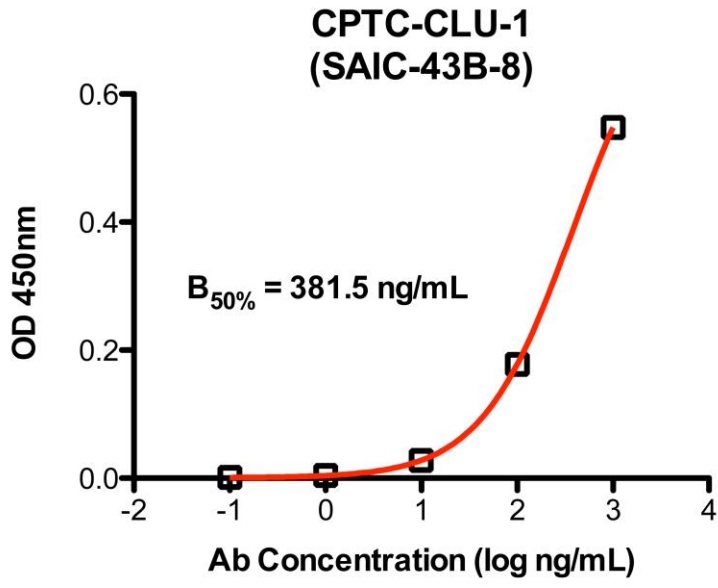

SAIC-103A, MUC1, EGTINVHDTVETQFNQYK.

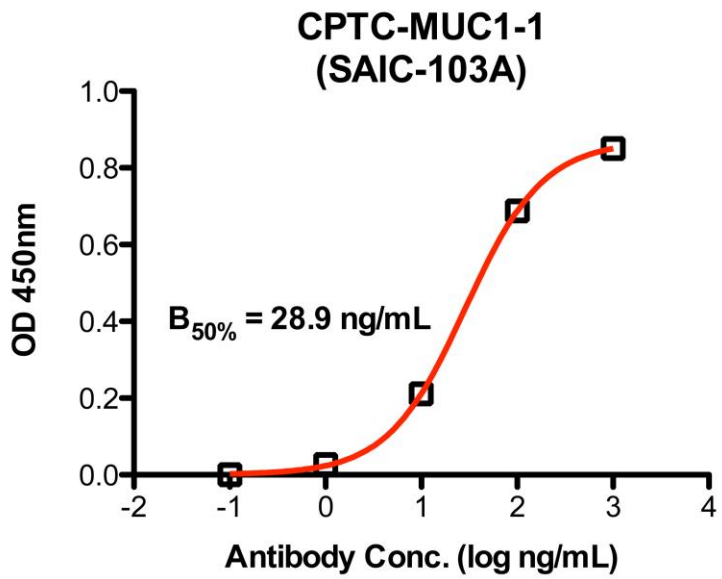

Supplement: supp_O114.043133_mcp.O114.043133-4.pdf [file supp_O114.043133_mcp.O114.043133-4.pdf]
