# Supplementary material
Source: PubMed Central journal article supplement (PMC4350033)
Supplement: supp_O114.043133_mcp.O114.043133-10.pdf [file supp_O114.043133_mcp.O114.043133-10.pdf]

**Supplemental Information 2. Gene and protein sequences of the 35 recombinant monoclonal antibodies.** The sequences of the heavy chain and the light genes are given, along with their protein sequences. The grey highlighted nucleotide and amino acid sequences indicate the variable region, and the nucleotide and amino acid sequences that are not highlighted indicate the constant region. The red letters represent start and stop codons.

**Table of contents (giving the heavy and light chain ID, the gene symbol, and the target peptide sequence):**

|                                                                 |       |
|-----------------------------------------------------------------|-------|
| SAIC-01B-4D8-H3, SAIC-01B-4D8-L4, CD44, TFIPVTSAK.....          | 3-4   |
| SAIC-02A-7-H1, SAIC-02A-7-L1, ERBB2, GLQSLPTHDPSP LQR.....      | 5-6   |
| SAIC-07B-14-H3, SAIC-07B-14-L2, XPNPEP1, GS LTFEPLTLVPIQTK..... | 7-8   |
| SAIC-07E-1-H3, SAIC-07E-1-L1, XPNPEP1, T LSLDEVYLIDSGAQYK.....  | 9-10  |
| SAIC-13B-19-H3, SAIC-13B-19-L3, ANXA1, AAY LQETGKPLDETLK.....   | 11-12 |
| SAIC-13C-5G10-H3, SAIC-13C-5G10-L2, ANXA1, G VDEATIIDILTK.....  | 13-14 |
| SAIC-14C-10F12-H1, SAIC-14C-10F12-L3, ANX A4, DEGNYLDDALVR..... | 15-16 |
| SAIC-16D-6B9-H2, SAIC-16D-6B9-L3, CALR, G LQTSQDAR.....         | 17-18 |
| SAIC-19D-1F4-H10, SAIC-19D-1F4-L1, GRB2, F GNDVQHFK.....        | 19-20 |
| SAIC-21C-4-H5, SAIC-21C-4-L1, FEN1, SIEEIV R.....               | 21-22 |
| SAIC-22D-22-H1, SAIC-22D-22-L4, GSTP1, YI SLIYTNYEAGK.....      | 23-24 |
| SAIC-23B-22-H3, SAIC-23B-22-L11, HSPB1, D GVVEITGK.....         | 25-26 |
| SAIC-23C-35-H1, SAIC-23C-35-L2, HSPB1, V SLDVNHFAPDELTVK.....   | 27-28 |
| SAIC-23E-30-H1, SAIC-23E-30-L4, HSPB1, L F DQAFGLPR.....        | 29-30 |
| SAIC-24B-4-H2, SAIC-24B-4-L2, IL18, ISTL S CENK.....            | 31-32 |
| SAIC-25B-112-H1, SAIC-25B-112-L1, LGALS1, S FVLNLGK.....        | 33-34 |
| SAIC-26C-15-H2, SAIC-26C-15-L15, NFkB2, I EVDLVTHSDPPR.....     | 35-36 |
| SAIC-27C-101-H1, SAIC-27C-101-L4, PCNA, L VQGSILK.....          | 37-38 |
| SAIC-28A-29-H2, SAIC-28A-29-L3, RAD23B, I LNDDTALK.....         | 39-40 |

|                                                               |       |
|---------------------------------------------------------------|-------|
| SAIC-28B-8-H5, SAIC-28B-8-L3, RAD23B, IDIDPEETVK.....         | 41-42 |
| SAIC-30C-18-H1, SAIC-30C-18-L3, RRM2, IEQEFLTEALPVK.....      | 43-44 |
| SAIC-30E-7-H2, SAIC-30E-7-L3, RRM2, DIQHWESLKPEER.....        | 45-46 |
| SAIC-31A-10-H3, SAIC-31A-10-L3, SNCG, TVEEAENIAVTSGVVR.....   | 47-48 |
| SAIC-32C-205-H1, SAIC-32C-205-L1, FSCN1, YLAPSGPSGTLK.....    | 49-50 |
| SAIC-33B-129-H1, SAIC-33B-129-L3, TAGLN, AAEDYGVK.....        | 51-52 |
| SAIC-34B-124-H1, SAIC-34B-124-L1, PRDX2, LSEDYGVK.....        | 53-54 |
| SAIC-34D-11-H1, SAIC-34D-11-L1, PRDX2, GLFIIDGK .....         | 55-56 |
| SAIC-36A-9-H3, SAIC-36A-9-L2, UBE2I, DHPFGFVAVPTK.....        | 57-58 |
| SAIC-37C-23-H1, SAIC-37C-23-L3, EZR, SGYLSSER.....            | 59-60 |
| SAIC-40A-24-H1, SAIC-40A-24-L3, PRDX4, QITLNDLPVGR.....       | 61-62 |
| SAIC-40C-8-H1, SAIC-40C-8-L2, PRDX4, LVQAFQYTDK.....          | 63-64 |
| SAIC-41A-1-H2, SAIC-41A-1-L4, UBE2C, GISAFPESDNLFK.....       | 65-66 |
| SAIC-41C-6-H4, SAIC-41C-6-L4, UBE2C, LSLEFPSGYPYNAPTvk.....   | 67-68 |
| SAIC-42B-10-H3, SAIC-42B-10-L2, SERPINA6, AQLLQGLGFNLTER..... | 69-70 |
| SAIC-43B-8-H1, SAIC-43B-8-L1, CLU, ASSIIDELFQDR.....          | 71-72 |

**SAIC-01B-4D8-H3**, CD44, TFIPVTSAK

>SAIC-01B-4D8-H3

ATGAGACTGGGCTGCGCTGGCTTCTCCTGGTCGCTGTGCTCAAAGGTGTCCAGTGTGTCAGTCGGTGG  
AGGAGTCCGGGGGTGCGCTGGTCACGCCTGGGACACCCCTGACACTCACCTGCAAAGTCTCTGGATT  
CTCCCTCAGCAGCTACGACATGGACTGGGTCCGCCAGGCTCCAGGGGAGGGGCTGGAATGGATCGG  
AATCATTAGTACTGGTGGTAGGAAATACTACGCGAGCTGGGCAAAGGCCGATTACCATCTCCAAAAC  
CTCGACCACGGTGGATCTGAAAATGACCAGTCTGACAACCGAGGACACGGCCACCTATTTCTGTGTCA  
GAGGGGGAGGTGGCTTGTGGGGGCCAGGCACCCTGGTCACCGTCTCCTCA  
GGGCAACCTAAGGCTCCATCAGTCTTCCCACTGGCCCCCTGCTGCGGGGACACACCCAGCTCCACGG  
TGACCCTGGGCTGCCTGGTCAAAGGGTACCTCCCGGAGCCAGTGACCGTGACCTGGAACCTCGGGCA  
CCCTCACCAATGGGGTACGCACCTTCCCGTCCGTCCGGCAGTCCTCAGGCCTCTACTCGCTGAGCAG  
CGTGGTGAGCGTGACCTCAAGCAGCCAGCCCGTCACCTGCAACGTGGCCACCCAGCCACCAACAC  
CAAAGTGGACAAGACCGTTGCGCCCTCGACATGCAGCAAGCCCACGTGCCACCCCTGAACTCCTG  
GGGGGACCGTCTGTCTTCATCTTCCCCC AAAACCAAGGACACCCTCATGATCTCACGCACCCCGA  
GGTCACATGCGTGGTGGTGGACGTGAGCCAGGATGACCCCGAGGTGCAGTTCACATGGTACATAACA  
ACGAGCAGGTGCGCACCCGCCCGCCGCTACGGGAGCAGCAGTTCAACAGCACGATCCGCGTGG  
TCAGCACCCCTCCCATCGCGCACCCAGGACTGGCTGAGGGGCAAGGAGTTCAAGTGCAAAGTCCACAA  
CAAGGCACTCCCGGCCCCCATCGAGAAAACCATCTCCAAAGCCAGAGGGCAGCCCTGGAGCCGAA  
GGTCTACACCATGGGCCCTCCCGGGAGGAGCTGAGCAGCAGGTCCGGTCAGCCTGACCTGCATGATC  
AACGGCTTCTACCCTTCCGACATCTCGGTGGAGTGGGAGAAGAACGGGAAGGCAGAGGACA ACTACA  
AGACCACGCCGGCCGTGCTGGACAGCGACGGCTCCTACTTCTCTACAGCAAGCTCTCAGTGCCAC  
GAGTGAGTGGCAGCGGGGCGACGTCTTCACCTGCTCCGTGATGCACGAGGCCTTGACAACCACTAC  
ACGCAGAAGTCCATCTCCCGCTCTCCGGGTAAATGA

**Protein sequence:**

>SAIC-01B-4D8-H3

METGLRWLLLVAVLKGVQCQSVEESGGRLVTPGTLTLTCKVSGFSLSSYDMDWVRQAPGEGLEWIGIIST  
GGRKYYASWAKGRFTISKSTTTVDLKMTSLTTEDTATYFCVRGGGLWGPGLVTVSSGQPKAPSVFPLA  
PCCGDTPSSTVTLGCLVKGYLPEPVTVTWNSGTLTNGVRTFSPVRQSSGLYSLSSVSVTSSSQPVTCNV  
AHPATNTKVDKTVAPSTCSKPTCPPPELLGGPSVFIFPPKPKDTLMISRTPEVTCVVVDVSQDDPEVQFTW  
YINNEQVRTARPPLREQQFNSTIRVVSTLPIAHQDWLRGKEFKCKVHNKALPAPIEKTISKARGQPLEPKVY  
TMGPPREELSSRSVSLTCMINGFYPSDISVEWEKNGKAEDNYKTTPAVLDSGYSFLYSKLSVPTSEWQR  
GDVFTCSVMHEALHNHYTQKSISRSPGK-

**SAIC-01B-4D8-L4**, CD44, TFIPVTSAK

>SAIC-01B-4D8-L4

ATGACACGAGGGCCCCCACTCAGCTGCTGGGGCTCCTGCTGCTCTGGCTCCCAGGTGCCACATTTG  
CTCAAGTGCTGACCCAGACTGCATCGCCCGTGTCTGCAGCTGTGGGAGGCACAGTACCATCAATTGC  
CAGGCCAGTCAGAGTGTGGTAAGAACAACCGCTTGGCCTGGTTTCAGCAGAAACCAGGGCAGCCTC  
CCAAGCTCCTGATCTATTATGCATCCACTCTGGCATCTGGGGTCTCATCGCGGTTCAAAGGCAGTGGAT  
CTGGGACACAGTTCACCTCACCATCAGCGACGTGCAGTGTGACGATGCTGCCACTTACTACTGTCTA  
GGCACTTTTGATTGTAGTGCTGCTGATTGTAGGGCTTTCGGCGGAGGGACCGAGGTGGTGGTCAA  
GGTGATCCAGTTGCACCTACTGTCCTCATCTTCCCACCAGCTGCTGATCAGGTGGCAACTGGAACAGT  
CACCATCGTGTGTGGCGAATAAATACTTCCCGATGTCACCGTCACCTGGGAGGTGGATGGCACCA  
CCCAAACA ACTGGCATCGAGAACAGTAAAACACCGCAGAATTCTGCAGATTGTACCTACAACCTCAGCA

GCACTCTGACACTGACCAGCACACAGTACAACAGCCACAAAGAGTACACCTGCAAGGTGACCCAGGG  
CACGACCTCAGTCGTCCAGAGCTTCAATAGGGGTGACTGTAG

**Protein sequence:**

>SAIC-01B-4D8-L4

MDTRAPTQLLGLLLLWLPGATFAQVLTQTASPVSAAVGGTVTINCQASQSVGKNNRLAWFQQKPGQPPKL  
LIYYASTLASGVSSRFKGS GSGTQFTLTISDVQCDDAATYYCLGTFDCSAADCRAFGGGTEVVVKGDPVAP  
TVLIFPPAADQVATGTVTIVCVANKYFPDVTVTWEVDGTTQTTGIENSKTPQNSADCTYNLSSTLTLTSTQY  
NSHKEYTCKVTQGTTSVVQSFNRGDC-

**SAIC-02A-7-H1, ERBB2, GLQSLPTHDPSPQLQR**

>SAIC-02A-7-H1

ATG GAGACTGGGCTGCGCTGGCTTCTCCTGGTCGCTGTGCTCAAAGGTGTCCAGTGTCAAGTGGTGG  
AGGAGTCCGGGGGAGGCCTGGTCACGCCTGGAGGAACCCTGACACTCACCTGCACAGTCTCTGGAG  
TCTCCCTCGGTAGCGCTGCAATAAGTTGGGTCCGCCAGGCTCCAGGGGAGGGGGCTGGAATATATCGGA  
TTCATCATTGCTTCTAGTGGCAGACCATACTACTCGAACTGGGCAAAGGCCGGTTCACCATCTCCAAA  
ACCTCGACCACGGTGGATCTGAGAATCTCCAGTCTGACAACCGAGGACACGGCCACCTATTTCTGTGC  
CAAGTCAATGAGGTTGTGGGGCCCAGGCACCCTGGTCACCGTCTCCTCA  
GGGCAACCTAAGGCTCCATCAGTCTTCCCCTGGCCCCCTGCTGCGGGGACACACCCAGCTCCACGG  
TGACCCTGGGCTGCCTGGTCAAAGGGTACCTCCCGGAGCCAGTGACCGTGACCTGGAACCTCGGGCA  
CCCTCACCAATGGGGTACGCACCTTCCCGTCCGTCCGGCAGTCCTCAGGCCTCTACTCGCTGAGCAG  
CGTGGTGAGCGTGACCTCAAGCAGCCAGCCCGTCACCTGCAACGTGGCCACCCAGCCACCAACAC  
CAAAGTGGACAAGACCGTTGCGCCCTCGACATGCAGCAAGCCCACGTGCCACCCCTGAACTCCTG  
GGGGGACCGTCTGTCTTTCATCTTCCCCCAAACCAAGGACACCCTCATGATCTCACGCACCCCGA  
GGTCACATGCGTGGTGGTGGACGTGAGCCAGGATGACCCCGAGGTGCAGTTCACATGGTACATAAACA  
ACGAGCAGGTGCGCACCCGCCCGCCGCGCTACGGGAGCAGCAGTTCAACAGCAGATCCGCGTGG  
TCAGCACCCCTCCCATCGCGCACCCAGGACTGGCTGAGGGGCAAGGAGTTCAAGTGCAAAGTCCACAA  
CAAGGCACTCCCGGCCCCCATCGAGAAAACCATCTCCAAAGCCAGAGGGCAGCCCTGGAGCCGAA  
GGTCTACACCATGGGCCCTCCCGGGAGGAGCTGAGCAGCAGGTCCGGTCAGCCTGACCTGCATGATC  
AACGGCTTCTACCCTTCCGACATCTCGGTGGAGTGGGAGAAGAACGGGAAGGCAGAGGACAACACTACA  
AGACCACGCCGGCCGTGCTGGACAGCGACGGCTCCTACTTCTCTACAGCAAGCTCTCAGTGCCAC  
GAGTGAGTGGCAGCGGGGCGACGTCTTACCTGCTCCGTGATGCACGAGGCCTTGACAACCACTAC  
ACGCAGAAGTCCATCTCCCGCTCTCCGGGTAAATGA

**Protein sequence:**

>SAIC-02A-7-H1

METGLRWLLLVAVLKGVQCQSVEESGGGLVTPGGTLTLTCTVSGVSLGSAAISWVRQAPGEGLEYIGFIAS  
SGRPYYSNWAKGRFTISKSTTTVDLRISLTTEDTATYFCAKSMRLWPGTLVTVSSGQPKAPSVFPLAPC  
CGDTPSSTVTLGCLVKGYLPEPVTVWNSGTLTNGVTRTFPSVRQSSGLYLSVSVVSVTSSSQPVTCNVAH  
PATNTKVDKTVAPSTCSKPTCPPPELLGGPSVFIKPKKDTLMISRTPEVTCVVDVSDDEPEVQFTWYIN  
NEQVRTARPLREQQFNSTIRVVSTLPIAHQDWLRGKEFKCKVHNKALPAPIEKTISKARGQPLEPKVYTMG  
PPREELSSRSVSLTCMINGFYPSDISVEWEKNGKAEDNYKTTPAVLDSGYSFLYKLSVPTSEWQRGDVF  
TCSVMHEALHNHYTQKSISRSPGK-

**SAIC-02A-7-L1, ERBB2, GLQSLPTHDPSPQLQR**

>SAIC-02A-7-L1

ATG GACACGAGGGCCCCACTCAGCTGCTGGGGCTCCTGCTGCTCTGGCTCCAGGTGCCACATCTG  
CCCAAGCCGTGGTGACCCAGACTCCATCGTCCGTGTCTGCAGCTGTGGGAGGCACAGTACCATCAG  
TTGCCAGTCCAGTCAGAGTGTTAATAAAAACGACTTATCCTGGTATCAGCAGAAACCAGGGCAGCCTCC  
CAAGCTCCTGATCTATGAAGCATCCAAACTAGAACTGGGGTCCCATCGCGGTTCAAAGGCAGTGGAT  
CTGGGACACGGTTCCTCTCACCATCAGTGGCGTGCAGTGTGACGATGCTGCCACTTATTACTGTCTAG  
GCGTTTATTCTGATGCT  
GGTGATAATACTTTCGGCGGAGGGACCAAGGTGGTTCGTCGAAGTTGCTACATTGGCACCTACTGTCCT  
CATCTTCCCACCATCTCCTGCTGAGCTGGCAACTGGAACAGCCACCATCGTGTGCGTGGCAAACAAT  
ACTTCCCAGATGGCACCGTCACCTGGCAGGTGGAT

GGCAAGCCCCTAACAACCTGGCATCGAGACCAGTAAAACACCGCAGAATTCTGATGATTGTACCTACAAC  
CTCAGCAGTACTCTGACACTGAAAAGCGACGAGTACAACAGCCACGACGAGTACACCTGCCAGGTGG  
CCCAGGGCTCAGGCTCACCGGTCGTCCAGAGCTTCAGTAGGAAGAAGTGTAG  
AGCGAGACGCCTGCCAGGGCACCGCCAGCGACCCTGAGGCCAGCCTCGCCGCTCCCTCCCCTCAG  
TGGACCCATTCCCA

**Protein sequence:**

>SAIC-02A-7-L1

MDTRAPTQLLGLLLLWLPGATSAQAVVTQTPSSVSAAVGGTVTISCQSSQSVNKNDSLWYQQKPGQPPKL  
LIYEASKLETGVPSRFKGS GSGTRFTLTISGVQCDDAATYYCLGVYSDAGDNTFGGGTKVVVEVATLPTV  
LIFPPSPAELATGTATIVCVANKYFPDGTVTWQVDGKPLTTGIETSKTPQNSDDCTYNLSSTLTLKSDEYNS  
HDEYTCQVAQGS GSPVVQSFSRKNC-



CCCAAACAACCTGGCATCGAGAACAGTAAACACCGCAGAATTCTGCAGATTGTACCTACAACCTCAGCA  
GCACTCTGACACTGACCAGCACACAGTACAACAGCCACAAAGAGTACACCTGCAAGGTGACCCAGGG  
CACGACCTCAGTCGTCAGAGCTTCAATAGGGGTGACTGTAG

**Protein sequence:**

>SAIC-07B-14-L2

MDTRAPTQLLGLLLLWLPGARCADIVMTQTPASVEAAVGGTVTIKCQASQSIGKNFIAWYQQKPGQPPKLLI  
YAASNLASGVSSRFKSGSGTEFALTISDLECADAAATYYCQSHFYSNINVYGNTEFGGGTEVVVKGDPVAPT  
VLIFPPAADQVATGTVTIVCVANKYFPDVTVTWEVDGTTQTTGIENSKTPQNSADCTYNLSSTLTLTSTQYN  
SHKEYTCKVTQGTTSSVVQSFNRGDC-



**SAIC-07E-1-H3**, XPNPEP1, TSLDEVYLIDSGAQYK

>SAIC-07E-1-H3

ATG GAGACTGGGCTGCGCTGGCTTCTCCTGGTCGCTGTGCTCAAAGGTGTCCAGTGTGTCAGTCGGTGA  
AGGAGTCCGAGGGAGGTCTCTTCAAGCCAACGGATACCCTGACACTCACCTGCACAGTCTCTGGATTC  
TCCCTCAGTAGCAATGCAATAAGTTGGGTCCGCCAGTCTCCAGACAACGGGGCTGGAATGGATCGGGAC  
TATTGGTCTTAGTGGTAGGACATACTACGCGAGCTGGGCGAAAGGCCGATCCACCATCACCAGAGACA  
CCAACGAAAACACGGTGACTCTGAAAATGACCAGTCTGACAGCCGCGGATGCGGGCCACCTATTTCTGT  
GCGAGACATTTTGATGGTGCTTTCGATCCCTGGGGCCCAGGCACCCTGGTCACCGTCTCCTCA  
GGGCAACCTAAGGCTCCATCAGTCTTCCCACTGGCCCCCTGCTGCGGGGACACACCCAGCTCCACGG  
TGACCCTGGGCTGCCTGGTCAAAGGGTACCTCCCGGAGCCAGTGACCGTGACCTGGAACCTCGGGCA  
CCCTCACCAATGGGGTACGCACCTTCCCGTCCGTCCGGCAGTCCTCAGGCCTCTACTCGCTGAGCAG  
CGTGGTGAGCGTGACCTCAAGCAGCCAGCCCGTCACCTGCAACGTGGCCCACCCAGCCACCAACAC  
CAAAGTGGACAAGACCGTTGCGCCCTCGACATGCAGCAAGCCCACGTGCCACCCCCCTGAACTCCTG  
GGGGGACCGTCTGTCTTCATCTTCCCCCAAACCCAAGGACACCCTCATGATCTCACGCACCCCCGA  
GGTCACATGCGTGGTGGTGGACGTGAGCCAGGATGACCCCGAGGTGCAGTTCACATGGTACATAAACA  
ACGAGCAGGTGCGCACCCGCCCGCCGCGCTACGGGAGCAGCAGTTCAACAGCAGCAGATCCGCGTGG  
TCAGCACCCCTCCCATCGCGCACCCAGGACTGGCTGAGGGGCAAGGAGTTCAAGTGCAAAGTCCACAA  
CAAGGCACTCCCGGCCCCCATCGAGAAAACCATCTCCAAAGCCAGAGGGCAGCCCTGGAGCCGAA  
GGTCTACACCATGGGCCCTCCCGGGAGGAGCTGAGCAGCAGGTCCGGTCAGCCTGACCTGCATGATC  
AACGGCTTCTACCCTTCCGACATCTCGGTGGAGTGGGAGAAGAACGGGAAGGCAGAGGACAACACTACA  
AGACCACGCCGGCCGTGCTGGACAGCGACGGCTCCTACTTCTCTACAGCAAGCTCTCAGTGCCAC  
GAGTGAGTGGCAGCGGGGCGACGTCTTCACCTGCTCCGTGATGCACGAGGCCTTGACAACCACTAC  
ACGCAGAAGTCCATCTCCCGCTCTCCGGGTAAATGA

**Protein sequence:**

>SAIC-07E-1-H3

METGLRWLLLVAVLKGVQCQSVKESEGGLFKPTDTLTLTCTVSGFLSSNAISWVRQSPDNGLEWIGTIGL  
SGRTYYASWAKGRSTITRDTNENTVTLKMTSLTAADAATYFCARHFDGAFDPWGPGLVTVSSGQPKAPS  
VFPLAPCCGDTPSSTVTLGCLVKGYLPEPVTVTWNSGTLTNGVRTFPSVRQSSGLYSLSSVSVTSSSQPV  
TCNVAHPATNTKVDKTVAPSTCSKPTCPPPELLGGPSVFIFPPKPKDTLMISRTPEVTCVVVDVSDDEPEV  
QFTWYINNEQVRTARPLREQQFNSTIRVVSTLPIAHQDWLRGKEFKCKVHNKALPAPIEKTISKARGQPLE  
PKVYTMGPPREELSSRSVSLTCMINGFYPSDISVEWEKNGKAEDNYKTPAVLDSGYSFLYKLSVPTSE  
WQRGDVFTCSVMHEALHNHYTQKSISRSPGK-

**SAIC-07E-1-L1**, XPNPEP1, TSLDEVYLIDSGAQYK

>SAIC-07E-1-L1

ATG GACACGAGGGCCCCACTCAGCTGCTGGGGCTCCTGCTGCTCTGGCTCCAGGTGCCACATTTG  
CGCAAGTGCTGACCCAGACTCCATCGCCCGTGTCTGCCGCTGTGGGAGGCACAGTCACCATCGACTG  
CCAGTCCAGTCAGACTGTCTATAAAAACAACCGCTTAGCCTGGTATCAGCAGAAACCAGGGCAGCCTC  
CCAAGCAACTGATCAGTTATGCATCCACTCTGGCATCTGGGGTCCCATCGCGGTTCAAAGGCAGTGGA  
TCTGGGACACAGTTCACTCTCACCATCAGCGACCTGGAGTGTGACGATGCTGCCACTTATTATTGTCAA  
GGCTATTATAGTGGTGTATTTCATACTTTCGGCGGAGGGACCAAGGTGGTCGTCGAA  
GTTGCTACATTGGCACCTACTGTCTCATCTTCCACCATCTCCTGCTGAGCTGGCAACTGGAACAGCC  
ACCATCGTGTGCGTGGCAAACAAATACTTCCCGATGGCACCGTCACCTGGCAGGTGGATGGCAAGCC

CCTAACAACTGGCATCGAGACCAGTAAAACACCGCAGAATTCTGATGATTGTACCTACAACCTCAGCAG  
TACTCTGACACTGAAAAGCGACGAGTACAACAGCCACGACGAGTACACCTGCCAGGTGGCCCAGGGC  
TCAGGCTCACCGGTCGTCCAGAGCTTCAGTAGGAAGAACTGT**TAG**  
AGCGAGACGCCTGCCAGGGCACCGCCAGCGACCCTGAGGCCAGCCTCGCCGCTCCCTCCCCTCAG  
TGGACCCATTCCCA

**Protein sequence:**

>SAIC-07E-1-L1

MDTRAPTQLLGLLLLWLPGATFAQVLTQTPSPVSAAVGGTVTIDCQSSQTVYKNNRLAWYQQKPGQPPKQ  
LISYASTLASGVPSRFKGS SGTQFTLTISDLECDAAATYYCQGYYSGVIHTFGGGTKVVVEVATLAPTVLIF  
PPSPAELATGTATIVCVANKYFPDGTVTWQVDGKPLTTGIETSKTPQNSDDCTYNLSSTLTLKSDEYNSHD  
EYTCQVAQSGSPVVQSF SRKNC-



CCCAAACAACCTGGCATCGAGAACAGTAAACACCGCAGAATTCTGCAGATTGTACCTACAACCTCAGCA  
GCACTCTGACACTGACCAGCACACAGTACAACAGCCACAAAGAGTACACCTGCAAGGTGACCCAGGG  
CACGACCTCAGTCGTCAGAGCTTCAATAGGGGTGACTGTAG

**Protein sequence:**

>SAIC-13B-19-L3

MDTRAPTQLLGLLLLWLPGATFAQVLTQTPSSVSAAVGGTVSISCQSSQTVYYNNRLAWYQQKPGQPPKL  
LIYYVSTLASGVPSRFSGSGSGTQFTLTISDLGCDDAATYYCAGGYWSAGGETAFGGGTEVVVKGDPVAP  
TVLIFPPAADQVATGTVTIVCVANKYFPDVTVTWEVDGTTQTTGIENSKTPQNSADCTYNLSSTLTLTSTQY  
NSHKEYTCKVTQGTTSVVQSFNRGDC-

**SAIC-13C-5G10-H3, ANXA1, GVDEATIIDILTK**

>SAIC-13C-5G10-H3

ATG GAGACTGGGCTGCGCTGGCTTCTCCTGGTCGCTGTGCTCAAAGGTGTCCAGTGTGTCAGTCGCTGG  
AGGAGTCCGGGGGTGCGCTGGTCAAGCCTGACGAAACCCTGACACTCACCTGCACAGTCTCTGGAAT  
CGACCTCAGTACGAATGCAATAAACTGGGTCCGCCAGGCTCCAGGGGAGGGGGCTGGAATGGATCGGA  
GCCATTGGTATTAATAAAGATACATACTACGCGACCTGGGCGAAGCGCCGATTACCGTCTCCAAAACC  
TCGTGACCACGGTGGATCTGAAAATGACCAGTCTGACAACCGAGGACACAGCCACCTATTTCTGTGC  
CAGAGGGTTAGGCATCTGGGGCCCAGGCACCCTGGTCACCGTCTCCTCA  
GGGCAACCTAAGGCTCCATCAGTCTTCCCCTGGCCCCCTGCTGCGGGGACACACCCAGCTCCACGG  
TGACCCTGGGCTGCCTGGTCAAAGGGTACCTCCCGGAGCCAGTGACCGTGACCTGGAACCTCGGGCA  
CCCTCACCAATGGGGTACGCACCTTCCCGTCCGTCCGGCAGTCCTCAGGCCTCTACTCGCTGAGCAG  
CGTGGTGAGCGTGACCTCAAGCAGCCAGCCCGTCACCTGCAACGTGGCCACCCAGCCACCAACAC  
CAAAGTGGACAAGACCGTTGCGCCCTCGACATGCAGCAAGCCCACGTGCCACCCCTGAACTCCTG  
GGGGACCGTCTGTCTTCATCTTCCCCCAAACCCAAGGACACCCTCATGATCTCACGCACCCCGA  
GGTCACATGCGTGGTGGTGGACGTGAGCCAGGATGACCCCGAGGTGCAGTTCACATGGTACATAACA  
ACGAGCAGGTGCGCACCCGCCCGCCGCTACGGGAGCAGCAGTTCAACAGCAGATCCGCGTGG  
TCAGCACCCCTCCCATCGCGCACCCAGGACTGGCTGAGGGGCAAGGAGTTCAAGTGCAAAGTCCACAA  
CAAGGCACTCCCGGCCCCCATCGAGAAAACCATCTCAAAGCCAGAGGGCAGCCCTGGAGCCGAA  
GGTCTACACCATGGGCCCTCCCGGGAGGAGCTGAGCAGCAGGTGGTCCAGCCTGACCTGCATGATC  
AACGGCTTCTACCCTTCCGACATCTCGGTGGAGTGGGAGAAGAACGGGAAGGCAGAGGACAACACTACA  
AGACCACGCCGGCCGTGCTGGACAGCGACGGCTCCTACTTCTCTACAGCAAGCTCTCAGTGCCAC  
GAGTGAGTGGCAGCGGGGCGACGTCTTACCTGCTCCGTGATGCACGAGGCCCTGCACAACCACTAC  
ACGCAGAAGTCCATCTCCCGCTCTCCGGGTAAATGA

**Protein sequence:**

>SAIC-13C-5G10-H3

METGLRWLLLVAVLKGVQCQSLEESGGRLVKPDETLTLTCTVSGIDLSTNAINWVRQAPGEGLEWIGAIGIN  
KDTYYATWAKRRFTVSKTSSTTVDLKMTSLTTEDTATYFCARGLGIWGPGLVTVSSGQPKAPSVFPLAPC  
CGDTPSSTVTLGCLVKGYLPEPVTVWNSGTLTNGVRTFPSVRQSSGLYLSVVSVTSSSQPVTCNVAH  
PATNTKVDKTVAPSTCSKPTCPPPELLGGPSVFIFPPKPKDTLMISRTPEVTCVVVDVSDDEPEVQFTWYIN  
NEQVRTARPLREQQFNSTIRVVSTLPIAHQDWLRGKEFKCKVHNKALPAPIEKTISKARGQPLEPKVYTMG  
PPREELSSRSVSLTCMINGFYPSDISVEWEKNGKAEDNYKTTPAVLDSGYSFLYSKLSVPTSEWQRGDVF  
TCSVMHEALHNHYTQKSISRSPGK-

**SAIC-13C-5G10-L2, ANXA1, GVDEATIIDILTK**

>SAIC-13C-5G10-L2

ATG GACACGAGGGCCCCACTCGGCTGCTGGGGCTCCTGCTGCTCTGGCTCCAGGTGCCACATTTG  
CGCAAGTGCTGACCCAGACTGCATCGTCCGTGTCTGCAGCTGTGGGAGGCACAGTACCATCAGTTG  
CCAGTCCAGTCAGAGTGTTGATAAACACAACAACCTTAGCCTGGTTTCAGCAGAAACCAGGGCAGCCTC  
CCAAGCGCCTGATCTACAAGGCATCCACTCTGGAATCTAGGGTCCCATCGCGGTTCAAAGGCAGTGGA  
TCTGGGACACAGTTCCTACTCTACCATCAGCGGCGTGACGTGTGACGATGCTGCCACTTACTACTGTGC  
AGGCGGTTTTAGTACTAATGTTATTACTTTCCGGCGGAGGGACCGAGGTGGTGGTCAAA  
GGTGTATCCAGTTGCACCTACTGTCCTCATCTTCCCACCAGCTGCTGATCAGGTGGCAACTGGAACAGT  
CACCATCGTGTGTGGCGAATAAATACTTTCCCGATGTCACCGTACCTGGGAGGTGGATGGCACCA

CCCAAACAACCTGGCATCGAGAACAGTAAACACCGCAGAATTCTGCAGATTGTACCTACAACCTCAGCA  
GCACTCTGACACTGACCAGCACACAGTACAACAGCCACAAAGAGTACACCTGCAAGGTGACCCAGGG  
CACGACCTCAGTCGTCCAGAGCTTCAATAGGGGTGACTGTAG

**Protein sequence:**

>SAIC-13C-5G10-L2

MDTRAPTRLLGLLLLWLPGATFAQVLTQTASSVSAAVGGTVTISCQSSQSVDKHNNLAWFQQKPGQPPKR  
LIYKASTLESRVPSRFKGS SGTQFTLTISGVQCDDAATYYCAGGFSTNVITFGGGTEVVVKGDPVAPTCLI  
FPPAADQVATGTVTIVCVANKYFPDVTVTWEVDGTTQTTGIENSKTPQNSADCTYNLSSTLTLTSTQYN  
SH  
KEYTCKVTQGTTSVVQSFNRGDC-

**SAIC-14C-10F12-H1, ANXA4, DEGNYLDDALVR**

>SAIC-14C-10F12-H1

ATG GAGACTGGGCTGCGCTGGCTTCTCCTGGTCGCTGTGCTCAAAGGTGTCCAGTGTGAGTCCGGTGG  
AGGAGTCCGGGGGTGCGCTGGTCACGCCTGGGACACCCCTGACACTCACCTGCACAGTCTCTGAAAT  
CGACCTCAGTAGCAATGCAATGAGCTGGGTCCGCCAGGCTCCAGGGAAGGGGCTGGTATGGATCGGA  
GCCATTAATAAGATTGGTAATATACTCTACGCGAGCTGGGCGAAAGGCCGATTACCATCTCCAAAACCT  
CGTCGACCACGGTGGATCTGAAAATCGCCAGTCCGACAACCGAGGACACGGCCACCTATTTTTGTACC  
AGGGGTTATGGTTCTGGTGGTATATGGGGCCCAGGCACCCTGGTCACCGTCTCCTCA  
GGGCAACCTAAGGCTCCATCAGTCTTCCCACTGGCCCCCTGCTGCGGGGACACACCCAGCTCCACGG  
TGACCCTGGGCTGCCTGGTCAAAGGGTACCTCCCGGAGCCAGTGACCGTGACCTGGAACCTCGGGCA  
CCCTCACCAATGGGGTACGCACCTTCCCGTCCGTCCGGCAGTCCTCAGGCCTCTACTCGCTGAGCAG  
CGTGGTGAGCGTGACCTCAAGCAGCCAGCCCGTCACCTGCAACGTGGCCACCCAGCCACCAACAC  
CAAAGTGGACAAGACCGTTGCGCCCTCGACATGCAGCAAGCCCACGTGCCACCCCTGAACTCCTG  
GGGGACCGTCTGTCTTCATCTTCCCCCAAACCAAGGACACCCTCATGATCTCACGCACCCCGA  
GGTCACATGCGTGGTGGTGGACGTGAGCCAGGATGACCCCGAGGTGCAGTTCACATGGTACATAACA  
ACGAGCAGGTGCGCACCCGCCCGCCGCTACGGGAGCAGCAGTTCAACAGCAGATCCGCGTGG  
TCAGCACCCCTCCCATCGCGCACCCAGGACTGGCTGAGGGGCAAGGAGTTCAAGTGCAAAGTCCACAA  
CAAGGCACTCCCGGCCCCCATCGAGAAAACCATCTCCAAAGCCAGAGGGCAGCCCTGGAGCCGAA  
GGTCTACACCATGGGCCCTCCCGGGAGGAGCTGAGCAGCAGGTCCGGTCAGCCTGACCTGCATGATC  
AACGGCTTCTACCCTTCCGACATCTCGGTGGAGTGGGAGAAGAACGGGAAGGCAGAGGACAACACTACA  
AGACCACGCCGGCCGTGCTGGACAGCGACGGCTCCTACTTCTCTACAGCAAGCTCTCAGTGCCAC  
GAGTGAGTGGCAGCGGGGCGACGTCTTCACCTGCTCCGTGATGCACGAGGCCTTGACAACCACTAC  
ACGCAGAAGTCCATCTCCCGCTCTCCGGGTAAATGA

**Protein sequence:**

>SAIC-14C-10F12-H1

METGLRWLLLVAVLKGVQCQSVEESGGRLVTPGTLTLTCTVSEIDLSSNAMSWVRQAPGKGLVWIGAINK  
IGNILYASWAKGRFTISKTSSTTVDLKIASPTTEDTATYFCTRGYGSGGIWPGTLVTVSSGQPKAPSVFPLA  
PCCGDTPSSTVTLGCLVKGYLPEPVTVTWNSGTLTNGVRTFSPVRQSSGLYSLSSVSVTSSSQPVTCNV  
AHPATNTKVDKTVAPSTCSKPTCPPPELLGGPSVFIFPPKPKDTLMISRTPEVTCVVVDVSDDDPEVQFTW  
YINNEQVRTARPPLREQQFNSTIRVVSTLPIAHQDWLRGKEFKCKVHNKALPAPIEKTISKARGQPLEPKVY  
TMGPPREELSSRSVSLTCMINGFYPSDISVEWEKNGKAEDNYKTTPAVLDSGYSFLYSKLSVPTSEWQR  
GDVFTCSVMHEALHNHYTQKSISRSPGK-

**SAIC-14C-10F12-L3, ANXA4, DEGNYLDDALVR**

>SAIC-14C-10F12-L3

ATG GACACGAGGGCCCCACTCAGCTGCTGGGGCTCCTGCTGCTCTGGCTCCAGGTGCCACATTTG  
CCCAAGTGCTGACCCAGACTCCATCCCCTGTGTCTGCACCTGTGGGAGGCACAGTCACCATCAATTGC  
CAGGCCAGTCAGAGTCTTTATAATAAGAAAAATTTAGCCTGGTATCAGCAGAAACCAGGGCAACCTCCC  
AAGCTCCTGATCTACTATATATCCACTCTGGCATCTGGGGTCTCATCGCGGTTCAAAGGCAGTGGATCT  
GGGACACAGTTCGCTCTCACCATCAGCGGCGTGACGTGTGACGATGCTGCCACTTACTACTGTCAAGG  
CGAATTTAGTTGTAGTAGTGGTATTGTGTTGCTTTCGGCGGAGGGACCGAGGTGGTGGTCAAA  
GGTGATCCAGTTGCACCTACTGTCCTCATCTTCCCACCAGCTGCTGATCAGGTGGCAACTGGAACAGT  
CACCATCGTGTGTGGCGAATAAATACTTTCCCGATGTCACCGTCACCTGGGAGGTGGATGGCACCA

CCCAAACAACCTGGCATCGAGAACAGTAAAACACCGCAGAATTCTGCAGATTGTACCTACAACCTCAGCA  
GCACTCTGACACTGACCAGCACACAGTACAACAGCCACAAAGAGTACACCTGCAAGGTGACCCAGGG  
CACGACCTCAGTCGTCCAGAGCTTCAATAGGGGTGACTGTAG

**Protein sequence:**

>SAIC-14C-10F12-L3

MDTRAPTQLLGLLLLWLPGATFAQVLTQTPSPVSAPVGGTVTINCQASQSLYNKKNLAWYQQKPGQPPKL  
LIYYISTLASGVSSRFKSGSGTQFALTISGVQCDDAATYYCQGEFSCSSGDCVAFGGGTEVVVKGDPVAP  
TVLIFPPAADQVATGTVTIVCVANKYFPDVTVTWEVDGTTQTTGIENSKTPQNSADCTYNLSSTLTLTSTQY  
NSHKEYTCKVTQGTTSVVQSFNRGDC-



**SAIC-16D-6B9-H2, CALR, GLQTSQDAR**

>SAIC-16D-6B9-H2

ATG GAGACTGGGCTGCGCTGGCTTCTCCTGGTCGCTGTGCTCAAAGGTGTCCAGTGTGAGTCGGTGG  
AGGAGTCCGGGGGTGCGCTGGTCACGCCTGGGACACCCCTGACACTCACCTGCACAGCCTCTGGATT  
CTCCCTCAGTAGCGATGCAGTGGGCTGGGTCCGCCAGACTCCAGGGAAGGGGCTGGAATGGATCGG  
ACAGATTGGTATTAGTGGTAGGATATATTCCGCGAGTTGGGCGAAAGGCCGATTCACTATCTCCAGAAC  
CTCGACCATGGTGGATCTGAAAATCACCAGTCCGACAACCGAGGACACGGCCACTTATTTCTGTGCCA  
GATACCGTGCCAGCGGTAATTTTACATCTGGGGCCCCGGGCACCCTGGTCACCGTCTCCTCA  
GGGCAACCTAAGGCTCCATCAGTCTTCCCCTGGCCCCCTGCTGCGGGGACACACCCAGCTCCACGG  
TGACCCTGGGCTGCCTGGTCAAAGGGTACCTCCCGGAGCCAGTGACCGTGACCTGGAACCTCGGGCA  
CCCTCACCAATGGGGTACGCACCTTCCCGTCCGTCCGGCAGTCCTCAGGCCTCTACTCGCTGAGCAG  
CGTGGTGAGCGTGACCTCAAGCAGCCAGCCCGTCACCTGCAACGTGGCCACCCAGCCACCAACAC  
CAAAGTGGACAAGACCGTTGCGCCCTCGACATGCAGCAAGCCCACGTGCCACCCCCCTGAACTCCTG  
GGGGGACCGTCTGTCTTCATCTTCCCCCAAACCAAGGACACCCTCATGATCTCACGCACCCCCGA  
GGTCACATGCGTGGTGGTGGACGTGAGCCAGGATGACCCCGAGGTGCAGTTCACATGGTACATAACA  
ACGAGCAGGTGCGCACCCGCCCGCCGCGCTACGGGAGCAGCAGTTCAACAGCAGCAGTCCGCGTGG  
TCAGCACCCCTCCCATCGCGCACCCAGGACTGGCTGAGGGGCAAGGAGTTCAAGTGCAAAGTCCACAA  
CAAGGCACTCCCGGCCCCCATCGAGAAAACCATCTCAAAGCCAGAGGGCAGCCCTGGAGCCGAA  
GGTCTACACCATGGGCCCTCCCGGGAGGAGCTGAGCAGCAGGTGCGGTCAGCCTGACCTGCATGATC  
AACGGCTTCTACCCTTCCGACATCTCGGTGGAGTGGGAGAAGAACGGGAAGGCAGAGGACAACACTACA  
AGACCACGCCGGCCGTGCTGGACAGCGACGGCTCCTACTTCTCTACAGCAAGCTCTCAGTGCCAC  
GAGTGAGTGGCAGCGGGGCGACGTCTTACCTGCTCCGTGATGCACGAGGCCTTGACAACCACTAC  
ACGCAGAAGTCCATCTCCCGCTCTCCGGGTAAATGA

**Protein sequence:**

>SAIC-16D-6B9-H2

METGLRWLLLVAVLKGVQCQSVEESGGRLVTPGTLTLTCTASGFLSSDAVGWVRQTPGKGLEWIGQIG  
ISGRIYSASWAKGRFTISRTSTMVDLKITSPTTEDTATYFCARYRASGNFDIWPGTLVTVSSGQPKAPSVF  
PLAPCCGDTPSSTVTLGCLVKGYLPEPVTVTWNSGTLNNGVTRFSPVRQSSGLYLSVVSVTSSSQPVT  
CNVAHPATNTKVDKTVAPSTCSKPTCPPPELLGGPSVFIFPPKPKDTLMISRTPEVTCVVDVSDDDPEVQ  
FTWYINNEQVRTARPPLREQQFNSTIRVVSTLPIAHQDWLRGKEFKCKVHNKALPAPIEKTISKARGQPLEP  
KVYTMGPPREELSSRSVSLTCMINGFYPSDISVEWEKNGKAEDNYKTTPAVLDSGDSYFLYSKLSVPTSEW  
QRGDVFTCSVMHEALHNHYTQKSISRSPGK-

**SAIC-16D-6B9-L3, CALR, GLQTSQDAR**

>SAIC-16D-6B9-L3

ATG GACACGAGGGCCCCACTCAGCTGCTGGGGCTCCTGCTGCTCTGGCTCCCAGGTGCCACATTTG  
CCCAAGTGCTGACCCAGACACCATCCCCGTGTCTGCAGCTGTGGGAGGCACAGTACCATCAGTTG  
CCAGGCCAGTCGGAATGTTTATAATAACAACAATTTAGCCTGGTATCAGCAGAAACCAGGGCAGCCTCC  
CAAGCTCCTGATCTACTGGGCATCCAACTGGCAACTGGGGTCTCATCGCGGTTCAAGGGCAGTGGAT  
CTGGGACACAGTTCACCTCACCATCAGCGGCTTGACGTGTGACGATGCTGCCACTTACTACTGTCAA  
GGCGAATTTGATTGCGGTACTTCTGATTGTAATGCTTTCGGCGGAGGGACCGAGGTGGTGGTCAGA  
GGTGATCCAGTTGCACCTACTGTCCTCATCTTCCCACCAGCTGCTGATCAGGTGGCAACTGGAACAGT  
CACCATCGTGTGTGGCGAATAAATACTTTCCCGATGTCACCGTACCTGGGAGGTGGATGGCACCA

CCCAAACAACCTGGCATCGAGAACAGTAAACACCCGCAGAATTCTGCAGATTGTACCTACAACCTCAGCA  
GCACTCTGACACTGACCAGCACACAGTACAACAGCCACAAAGAGTACACCTGCAAGGTGACCCAGGG  
CACGACCTCAGTCGTCCAGAGCTTCAATAGGGGTGACTGTAG

**Protein sequence:**

>SAIC-16D-6B9-L3

MDTRAPTQLLGLLLLWLPGATFAQVLTQTPSPVSAVGGTITISCQASRNVYNNNNLAWYQQKPGQPPKL  
LIYWASKLATGVSSRFKGSQSGTQFTLTISGLQCDDAATYYCQGEFDCGTSDCNAFGGGTEVVVRGDPVA  
PTVLIFPPAADQVATGTVTIVCVANKYFPDVTVTWEVDGTTQTTGIENSKTPQNSADCTYNLSSTLTLTSTQ  
YNSHKEYTCKVTQGTTSVVQSFNRGDC-

**SAIC-19D-1F4-H10, GRB2, FGNDVQHFK**

>SAIC-19D-1F4-H10

ATG GAGACTGGGCTGCGCTGGCTTCTCCTGGTCGCTGTGCTCAAAGGTGTCCAGTGTCAAGTCCGGTGG  
AGGAGTCCGGGGGTGCGCTGGTCACGCCTGGGACACCCCTGACACTCACCTGCACCGTCTCTGGATT  
CTCCCTCAGTAGTTACTATATGAGCTGGGTCCGCCAGGCTCCAGGGAAGGGGGCTGGAATGGATCGGAA  
GTATTAGTAGTCGTGGTGTGATGCATACTTCGCGGGCTGGGCGAAAGGCCGATTACCATCTCCAAAACCT  
CGACCACGGTGGATCTGAAAATCACCAGTCCGACAACCGAGGACACGGCCACCTATTTCTGTGCCAGA  
GGTGTGTTACTAATAGTATGGGTTGGAACATCTGGGGCCAGGCACCCTGGTCACCGTCTCCTCA  
GGGCAACCTAAGGCTCCATCAGTCTTCCCACTGGCCCCCTGCTGCGGGGACACACCCAGCTCCACGG  
TGACCCTGGGCTGCCTGGTCAAAGGGTACCTCCCGGAGCCAGTGACCGTGACCTGGAACCTCGGGCA  
CCCTCACCAATGGGGTACGCACCTTCCCGTCCGTCCGGCAGTCCTCAGGCCTCTACTCGCTGAGCAG  
CGTGGTGAGCGTGACCTCAAGCAGCCAGCCCGTCACCTGCAACGTGGCCACCCAGCCACCAACAC  
CAAAGTGGACAAGACCGTTGCGCCCTCGACATGCAGCAAGCCCACGTGCCACCCCTGAACTCCTG  
GGGGGACCGTCTGTCTTCATCTTCCCCCAAACCAAGGACACCCTCATGATCTCACGCACCCCGA  
GGTCACATGCGTGGTGGTGGACGTGAGCCAGGATGACCCCGAGGTGCAGTTCACATGGTACATAACA  
ACGAGCAGGTGCGCACCCGCCCGCCGCTACGGGAGCAGCAGTTCAACAGCACGATCCGCGTGG  
TCAGCACCCCTCCCATCGCGCACCCAGGACTGGCTGAGGGGCAAGGAGTTCAAGTGCAAAGTCCACAA  
CAAGGCACTCCCGGCCCCCATCGAGAAAACCATCTCCAAAGCCAGAGGGCAGCCCTGGAGCCGAA  
GGTCTACACCATGGGCCCTCCCGGGAGGAGCTGAGCAGCAGGTCCGGTCAGCCTGACCTGCATGATC  
AACGGCTTCTACCCTTCCGACATCTCGGTGGAGTGGGAGAAGAACGGGAAGGCAGAGGACAACACTACA  
AGACCACGCCGGCCGTGCTGGACAGCGACGGCTCCTACTTCTCTACAGCAAGCTCTCAGTGCCAC  
GAGTGAGTGGCAGCGGGGCGACGTCTTACCTGCTCCGTGATGCACGAGGCCTTGACAACCACTAC  
ACGCAGAAGTCCATCTCCCGCTCTCCGGGTAAATGA

**Protein sequence:**

>SAIC-19D-1F4-H10

METGLRWLLLVAVLKGVQCQSVEESGGRLVTPGTLTLTCTVSGFSLSSYYMSWVRQAPGKGLEWIGSIS  
SRGDAYFAGWAKGRFTISKSTTTVDLKITSPTEDTATYFCARGDVTNSMGWNIWGPGLTVTVSSGQPKA  
PSVFLAPCCGDTSPSTVTLGCLVKGYLPEPVTVTWNSGTLTNGVRTFSPVRQSSGLYSLSSVSVTSSSQ  
PVTCNVAHPATNTKVDKTVAPSTCSKPTCPPPELLGGPSVFIFPPKPKDTLMISRTPEVTCVVDVSDQDDPE  
VQFTWYINNEQVRTARPLREQQFNSTIRVVSTLPIAHQDWLRGKEFKCKVHNKALPAPIEKTISKARGQPL  
EPKVYTMGPPREELSSRSVSLTCMINGFYPSDISVEWEKNGKAEDNYKTTPAVLDSGYSFLYKLSVPTS  
EWQRGDVFTCSVMHEALHNHYTQKSISRSPGK-

**SAIC-19D-1F4-L1, GRB2, FGNDVQHFK**

>SAIC-19D-1F4-L1

ATG GACACGAGGGCCCCACTCAGCTGCTGGGGCTCCTGCTGCTCTGGCTCCAGGTGCCACATTTG  
CCCAAGTGCTGACCCAGACTCCATCCCCTGTGTCTGCATCTGTGGGAGGCACAGTCACCATCGTTTGC  
CAGTCCAGTCCGAGTATTTATAGCAACAAAAATTTAGCCTGGTATCAGCAGAAACCAGGGCAACCTCCC  
AAGCTCCTGATCTACGATGCATCCAATCTGGCATCTGGGGTCCCATCGCGGTTCAAAGGCAGTGGATCT  
GGGACAGAGTTCACTCTCACCATCAGCGACGTGCAGTGTGACGATGCTGCCACTTACTACTGTCAAGG  
CGAATTCAGTTGTAGTAGTGGTATTGTGTTGCTTTCGGCGGAGGGACCGAGGTGGTGGTCAA  
GGTGTCCAGTTGCACCTACTGTCCTCATCTTCCACCGGCTGCTGATCAGGTGGCAACTGGAACAGT  
CACCATCGTGTGTGGCGAATAAATACTTTCCCGATGTCACCGTCACCTGGGAGGTGGATGGCACCA

CCCAAACAACCTGGCATCGAGAACAGTAAACACCGCAGAATTCTGCAGATTGTACCTACAACCTCAGCA  
GCACTCTGACACTGACCAGCACACAGTACAACAGCCACAAAGAGTACACCTGCAAGGTGACCCAGGG  
CACGACCTCAGTCGTCAGAGCTTCAATAGGGGTGACTGTAG

**Protein sequence:**

>SAIC-19D-1F4-L1

MDTRAPTQLLGLLLLWLPGATFAQVLTQTPSPVSASVGGTVTIVCQSSPSIYSNKNLAWYQQKPGQPPKLLI  
YDASNLASGVPSRFKGS GSGTEFTLTISDVQCDDAATYYCQGEFSCSSGDCVAFGGGTEVVVKGDPVAPT  
VLIFPPAADQVATGTVTIVCVANKYFPDVTVTWEVDGTTQTTGIENSKTPQNSADCTYNLSSTLTLTSTQYN  
SHKEYTCKVTQGTTSVVQSFNRGDC-

**SAIC-21C-4-H5, FEN1, SIEEIVR**

>SAIC-21C-4-H5

ATG GAGACTGGGCTGCGCTGGCTTCTCCTGGTCGCTGTGCTCAAAGGTGTCCAGTGTCAAGTCCGGTGG  
AGGAGTCCGGGGGTGCGCTGGTCACGCCTGGGACAGCCCTGACACTCACCTGCACCGTCTCTGGATT  
CTCCCTCAGTAGCTATGCAATGATCTGGGTCCGCCAGGCTCCAGGGGAGGGGGCTGGAATGGATCGGA  
ATTATTAGTGTAGGGGTAGCGCATACTACGCGAGCTGGGCGAAAGGCCGATTCATCATCTCCAAAACC  
TCGACCACGGTGGATCTGAGAATCACCAGTCCGACAACCGAGGACACGGCCACCTATTTCTGTGCCAG  
AGGGCTGGGACTATCTAACATCTGGGGCCCAGGCACCCTGGTCACCGTCTCCTTG  
GGGCAACCTAAGGCTCCATCAGTCTTCCCCTGGCCCCCTGCTGCGGGGACACACCCAGCTCCACGG  
TGACCCTGGGCTGCCTGGTCAAAGGGTACCTCCCGGAGCCAGTGACCGTGACCTGGAACCTCGGGCA  
CCCTCACCAATGGGGTACGCACCTTCCCGTCCGTCCGGCAGTCCTCAGGCCTCTACTCGCTGAGCAG  
CGTGGTGAGCGTGACCTCAAGCAGCCAGCCCGTCACCTGCAACGTGGCCACCCAGCCACCAACAC  
CAAAGTGGACAAGACCGTTGCGCCCTCGACATGCAGCAAGCCCACGTGCCACCCCTGAACTCCTG  
GGGGGACCGTCTGTCTTCATCTTCCCCCAAACCCAAGGACACCCTCATGATCTCACGCACCCCGA  
GGTCACATGCGTGGTGGTGGACGTGAGCCAGGATGACCCCGAGGTGCAGTTCACATGGTACATAACA  
ACGAGCAGGTGCGCACCCGCCCGCCGCTACGGGAGCAGCAGTTCAACAGCAGATCCGCGTGG  
TCAGCACCCCTCCCATCGCGCACCCAGGACTGGCTGAGGGGCAAGGAGTTCAAGTGCAAAGTCCACAA  
CAAGGCACTCCCGGCCCCCATCGAGAAAACCATCTCCAAAGCCAGAGGGCAGCCCTGGAGCCGAA  
GGTCTACACCATGGGCCCTCCCGGGAGGAGCTGAGCAGCAGGTCCGGTCAGCCTGACCTGCATGATC  
AACGGCTTCTACCCTTCCGACATCTCGGTGGAGTGGGAGAAGAACGGGAAGGCAGAGGACAACACTACA  
AGACCACGCCGGCCGTGCTGGACAGCGACGGCTCCTACTTCTCTACAGCAAGCTCTCAGTGCCAC  
GAGTGAGTGGCAGCGGGGCGACGTCTTCACCTGCTCCGTGATGCACGAGGCCTTGACAACCACTAC  
ACGCAGAAGTCCATCTCCCGCTCTCCGGGTAAATGA

**Protein sequence:**

>SAIC-21C-4-H5

METGLRWLLLVAVLKGVQCQSVEESGGRLVTPGTALTLTCTVSGFSLSSYAMIWVRQAPGEGLEWIGIISV  
RGSAYYASWAKGRFIISKSTTTVDLRITSPPTEDTATYFCARGLGLSNIWGPGLVTVSLGQPKAPSVFPLA  
PCCGDTPSSTVTLGCLVKGYLPEPVTVTWNSGTLTNGVRTFSPVRQSSGLYSLSSVSVTSSSQPVTCNV  
AHPATNTKVDKTVAPSTCSKPTCPPPELLGGPSVFIFPPKPKDTLMISRTPEVTCVVVDVSDDDPEVQFTW  
YINNEQVRTARPPLREQQFNSTIRVVSTLPIAHQDWLRGKEFKCKVHNKALPAPIEKTISKARGQPLEPKVY  
TMGPPREELSSRSVSLTCMINGFYPSDISVEWEKNGKAEDNYKTTPAVLDSGSDSYFLYSKLSVPTSEWQR  
GDVFTCSVMHEALHNHYTQKSISRSPGK-

**SAIC-21C-4-L1, FEN1, SIEEIVR**

>SAIC-21C-4-L1

ATG GACACGAGGGCCCCCCTCAGCTGCTGGGGCTCCTGCTGCTCTGGCTCCCAGGTGCCAGATGT  
GATGTTGTGATGACCCAGACTCCAGCCTCCGTGGAGGCAGCTGTGGGAGGCACAGTCACCATCAAGT  
GCCAGGCCAGTCAGAGCATTAGCAGTTGGTTATCCTGGTATCAGCAGAAACCAGGGCAGCCTCCCAA  
CTCCTGATCTATGAAGCATCCAACTGGCCTCTGGGGTCCCATCGCGGTTCAAAGGCAGTGGATCTGG  
GACAGATTTCACTCTCACCATCAGCGACCTGGAGTGTGCCGATGCTGCCACTTACTACTGTCAATGCAC  
TTATGGTATTATTAGAGGCACTACTTATGGTGGGGCTTTCGGCGGAGGGACCGAGGTGGTGGTCAAG  
GGTGTATCCAGTTGCACCTACTGTCCTCATCTTCCCACCAGCTGCTGATCAGGTGGCAACTGGAACAGT  
CACCATCGTGTGTGTGGCGAATAAATACTTCCCAGTGTACCGTACCTGGGAGGTGGATGGCACCA

CCCAAACAACCTGGCATCGAGAACAGTAAACACCCGCAGAATTCTGCAGATTGTACCTACAACCTCAGCA  
GCACTCTGACACTGACCAGCACACAGTACAACAGCCACAAAGAGTACACCTGCAAGGTGACCCAGGG  
CACGACCTCAGTCGTCCAGAGCTTCAATAGGGGTGACTGTAG

**Protein sequence:**

>SAIC-21C-4-L1

MDTRAPPQLLGLLLLWLPGARCDVVMTPASVEAAVGGTVTIKCQASQSISWLSWYQQKPGQPPKLLI  
YEASKLASGVPSRFKGSSTDFTLTISDLECADAAATYYCQCTYGIIRGTTYGGAFGGGTEVVVKGDPVAP  
TVLIFPPAADQVATGTVTIVCVANKYFPDVTVTWEVDGTTQTTGIENSKTPQNSADCTYNLSSTLTLTSTQY  
NSHKEYTCKVTQGTTSVVQSFNRGDC-

**SAIC-22D-22-H1, GSTP1, YISLIYTNYEAGK**

>SAIC-22D-22-H1

ATG GAGACTGGGCTGCGCTGGCTTCTCCTGGTCGCTGTGCTCAAAGGTGTCCAGTGTGTCAGTCGGTGG  
AGGAGTCCGGGGGTGCGCTGGTCACGCCTGGGACACCCCTGACACTCACCTGCACAGTCTCTGGATT  
CTCCCTCAATAATTATGGAATGAACTGGGTCCGCCAGGCTCCAGGGAAGGGGCTGGAATGGATCGGAG  
TCATTATTAATAATGGTAAGACAGCCTACGCGGACTGGGCAAAGGCCGATTACCATCTCCAAAACCTC  
GTGACACCGGTGGATCTGAGAATGACCAGTCTGACAACCGAGGACACGGCCACCTATTTCTGTGTTA  
GAGGGTATTTTACGTATAATATATACATCTGGGGCCCAGGCACCCTGGTCACCGTCTCCTTA  
GGGCAACCTAAGGCTCCATCAGTCTTCCCACTGGCCCCCTGCTGCGGGGACACACCCAGCTCCACGG  
TGACCCTGGGCTGCCTGGTCAAAGGGTACCTCCCGGAGCCAGTGACCGTGACCTGGAACCTCGGGCA  
CCCTCACCAATGGGGTACGCACCTTCCCGTCCGTCCGGCAGTCCTCAGGCCTCTACTCGCTGAGCAG  
CGTGGTGAGCGTGACCTCAAGCAGCCAGCCCGTCACCTGCAACGTGGCCACCCAGCCACCAACAC  
CAAAGTGGACAAGACCGTTGCGCCCTCGACATGCAGCAAGCCCACGTGCCACCCCTGAACTCCTG  
GGGGGACCGTCTGTCTTCATCTTCCCCCAAACCAAGGACACCCTCATGATCTCACGCACCCCGA  
GGTCACATGCGTGGTGGTGGACGTGAGCCAGGATGACCCCGAGGTGCAGTTCACATGGTACATAACA  
ACGAGCAGGTGCGCACCCGCCCGCCGCTACGGGAGCAGCAGTTCAACAGCAGATCCGCGTGG  
TCAGCACCCCTCCCATCGCGCACCCAGGACTGGCTGAGGGGCAAGGAGTTCAAGTGCAAAGTCCACAA  
CAAGGCACTCCCGGCCCCCATCGAGAAAACCATCTCCAAAGCCAGAGGGCAGCCCTGGAGCCGAA  
GGTCTACACCATGGGCCCTCCCGGGAGGAGCTGAGCAGCAGGTCCGGTCAGCCTGACCTGCATGATC  
AACGGCTTCTACCCTTCCGACATCTCGGTGGAGTGGGAGAAGAACGGGAAGGCAGAGGACAACACTACA  
AGACCACGCCGGCCGTGCTGGACAGCGACGGCTCCTACTTCTCTACAGCAAGCTCTCAGTGCCAC  
GAGTGAGTGGCAGCGGGGCGACGTCTTCACCTGCTCCGTGATGCACGAGGCCTTGACAACCACTAC  
ACGCAGAAGTCCATCTCCCGCTCTCCGGGTAAATGA

**Protein sequence:**

>SAIC-22D-22-H1

METGLRWLLLVAVLKGVQCQSVEESGGRLVTPGTPPLTLTCTVSGFSLNNGMNWVRQAPGKLEWIGVII  
NNGKTAYADWAKGRFTISKTSSTTVDLRMTSLTTEDTATYFCVIRGYFTYNIYIWPGTLVTVSLGQPKAPSV  
FPLAPCCGDTSPSTVTLGCLVKGYLPEPVTVTWNSGTLTNGVIRTFPSVRQSSGLYSLSSVSVTSSSQPVT  
CNVAHPATNTKVDKTVAPSTCSKPTCPPPELLGGPSVFIFPPKPKDTLMISRTPEVTCVVVDVSDDDPEVQ  
FTWYINNEQVRTARPPLREQQFNSTIRVVSTLPIAHQDWLRGKEFKCKVHNKALPAPIEKTISKARGQPLEP  
KVYTMGPPREELSSRSVSLTCMINGFYPSDISVEWEKNGKAEDNYKTTPAVLDSGDSYFLYSKLSVPTSEW  
QRGDVFTCSVMHEALHNHYTQKSISRSPGK-

**SAIC-22D-22-L4, GSTP1, YISLIYTNYEAGK**

>SAIC-22D-22-L4

ATG GACACGAGGGCCCCACTCAGCTGCTGGGGCTCCTGCTGCTCTGGCTCCAGGTGCCACATTTG  
CGCAAGTGCTGACCCAGACTGCATCGTCCGTGTCTGCAGCTGTGGGAGGGACAGTACCATCAGTTG  
CCAGTCCAGTCAAAGTGTTTATAATAACCGCTTAACCTGGTTTCAGCAGAAACCAGGGCAGCCTCCCAA  
GCTCCTAATGTATTCTACATCCAGGCTGGCATCTGGGGTCCCATCGCGGTTACGCGGCAGTGGATCTAG  
GACACAGTTCACCTCTACCATCAGCGGCGTGCAGTGTGGCGATGCTGCCACTTACTACTGTCTAGGCG  
GTTATAGTGGTGAGATTGATGCTTTCGGCGGAGGGACCGAGGTGGTGGTCAAG  
AGTGATCCAGTTGCACCTACTGTCTCATCTTCCCACCAGCTGCTGATCAGGTGGCAACTGGAACAGT  
CACCATCGTGTGTGTGGCGAATAAATACTTTCCCGATGTCACCGTCACCTGGGAGGTGGATGGCACCA

CCCAAACAACCTGGCATCGAGAACAGTAAACACCCGCAGAATTCTGCAGATTGTACCTACAACCTCAGCA  
GCACTCTGACACTGACCAGCACACAGTACAACAGCCACAAAGAGTACACCTGCAAGGTGACCCAGGG  
CACGACCTCAGTCGTCAGAGCTTCAATAGGGGTGACTGTAG

**Protein sequence:**

>SAIC-22D-22-L4

MDTRAPTQLLGLLLLWLPGATFAQVLTQTASSVSAAVGGTITISCQSSQSVYNNRLTWFQQKPGQPPKLL  
MYSTSRLASGVPSRFSGSGSRTQFTLTISGVQCGDAATYYCLGGYSGEIDAFGGGTEVVVKSDPVAPTCLI  
FPPAADQVATGTVTIVCVANKYFPDVTVTWEVDGTTQTTGIENSKTPQNSADCTYNLSSTLTLTSTQYN  
SH  
KEYTCKVTQGTTSVVQSFNRGDC-



**SAIC-23B-22-H3**, HSPB1, DGVVEITGK

>SAIC-23B-22-H3

ATG GAGACTGGGCTGCGCTGGCTTCTCCTGGTCGCTGTGCTCAAAGGTGTCCAGTGTCAAGTGGCTGG  
AGGAGTCCGGGGGTGCGCTGGTCACGCCTGGGACACCCCTGACACTCACCTGTACAGTCTCTGGAGT  
CGGCCTCGATAGTATTGGGGTAAGGTGGGTCCGCCAGGCTCCAGGGAAGGGGCTGCAATACATCGGA  
GAGATTAGCAATATTGGCAACACATACTACCCGAAGTGGGCAAGAGGCCGATTACCATCTCCAAGACC  
TCGACCACGGTGGATCTGAAGATCACCAGCCGACAATCGAGGACACGGCCACCTATTTCTGTGCCAG  
GGGATGGCTATCGGGTTTTAAGTACATGTGGGGCCCAGGCACCCTGGTCACCGTCTCCTTA  
GGGCAACCTAAGGCTCCATCAGTCTTCCCACTGGCCCCCTGCTGCGGGGACACACCCAGCTCCACGG  
TGACCCTGGGCTGCCTGGTCAAAGGGTACCTCCCGGAGCCAGTGACCGTGACCTGGAACCTCGGGCA  
CCCTCACCAATGGGGTACGCACCTTCCCGTCCGTCCGGCAGTCCTCAGGCCTCTACTCGCTGAGCAG  
CGTGGTGAGCGTGACCTCAAGCAGCCAGCCCGTCACCTGCAACGTGGCCACCCAGCCACCAACAC  
CAAAGTGGACAAGACCGTTGCGCCCTCGACATGCAGCAAGCCCACGTGCCACCCCTGAACTCCTG  
GGGGGACCGTCTGTCTTCATCTTCCCCCAAACCAAGGACACCCTCATGATCTCACGCACCCCGA  
GGTCACATGCGTGGTGGTGGACGTGAGCCAGGATGACCCCGAGGTGCAGTTCACATGGTACATAACA  
ACGAGCAGGTGCGCACCCGCCCGCCGCGCTACGGGAGCAGCAGTTCAACAGCAGATCCGCGTGG  
TCAGCACCCCTCCCATCGCGCACCCAGGACTGGCTGAGGGGCAAGGAGTTCAAGTGCAAAGTCCACAA  
CAAGGCACTCCCGGCCCCCATCGAGAAAACCATCTCAAAGCCAGAGGGCAGCCCTGGAGCCGAA  
GGTCTACACCATGGGCCCTCCCGGGAGGAGCTGAGCAGCAGGTCCGGTCAGCCTGACCTGCATGATC  
AACGGCTTCTACCCTTCCGACATCTCGGTGGAGTGGGAGAAGAACGGGAAGGCAGAGGACAACACTACA  
AGACCACGCCGGCCGTGCTGGACAGCGACGGCTCCTACTTCTCTACAGCAAGCTCTCAGTGCCAC  
GAGTGAGTGGCAGCGGGGCGACGTCTTACCTGCTCCGTGATGCACGAGGCCCTGCACAACCACTAC  
ACGCAGAAGTCCATCTCCCGCTCTCCGGGTAAATGA

**Protein sequence:**

>SAIC-23B-22-H3

METGLRWLLLVAVLKGVQCQSLEESGGRLVTPGTPLTLTCTVSGVGLDSIGVRWVRQAPGKGLQYIGEISN  
IGNTYYPNWARGRFTISKSTTVDLKITSPTIEDTATYFCARGWLSGFKYMWGPGLVTVSLGQPKAPSVFP  
LAPCCGDTSPSTVTLGCLVKGYLPEPVTVTWNSGTLTNGVRTFSPVRQSSGLYSLSSVSVTSSSQPVTC  
NVAHPATNTKVDKTVAPSTCSKPTCPPPELLGGPSVFIFPPKPKDTLMISRTPEVTCVVVDVSDQDDPEVQFT  
WYINNEQVRTARPLREQQFNSTIRVVSTLPIAHQDWLRGKEFKCKVHNKALPAPIEKTISKARGQPLEPKV  
YTMGPPREELSSRSVSLTCMINGFYPSDISVEWEKNGKAEDNYKTTPAVLDSGYSYFLYSKLSVPTSEWQ  
RGDVFTCSVMHEALHNHYTQKSISRSPGK-

**SAIC-23B-22-L11**, HSPB1, DGVVEITGK

>SAIC-23B-22-L11

ATG GACACGAGGGCCCCACTCAGCTGCTGGGGCTCCTGCTGCTCTGGCTCCAGGTGCCAGATGTG  
CCGTCGTGCTGACCCAGACTCCAGCCTCCGTGTCTGCAGCTGTGGGAGGCACAGTCACCATCAATTG  
CCAGTCCAGTCAGAGTGTTGCTGATAACAACGAATTGCTCCTGGCTTCAGCAGAACTAGGGCAGCCTC  
CCAAACTCCTGATCTACAAGGCTTCCACTCTGGCATCTGGGGTCCCATCGCGGTTCAAAGGCAGTGGA  
TTTGGGACACAGTTCACTCTACCATCAGCGACGTGCAGTGTGACGATGCTGCCACTTATTGGTGTGC  
AGGCGGTTATAGTGATGGTACTGAGGATACTTTCGCCGGAGGGACCGAGGTGGTGGTCAGA  
GGTGATCCAGTTGCACCTACTGTCCTCATCTTCCCACCAGCTGCTGATCAGGTGGCAACTGGAACAGT  
CACCATCGTGTGTGTGGCGAATAAATACTTCCCAGTGTACCGTCACCTGGGAGGTGGATGGCACCA

CCCAAACAACCTGGCATCGAGAACAGTAAACACCGCAGAATTCTGCAGATTGTACCTACAACCTCAGCA  
GCACTCTGACACTGACCAGCACACAGTACAACAGCCACAAAGAGTACACCTGCAAGGTGACCCAGGG  
CACGACCTCAGTCGTCAGAGCTTCAATAGGGGTGACTGTAG

**Protein sequence:**

>SAIC-23B-22-L11

MDTRAPTQLLGLLLLWLPGARCAVVLTPASVSAAVGGTVTINCQSSQSVADNNELSWLQQKLGQPPKL  
LIYKASTLASGVPSRFKGSFGTQFTLTISDVQCDDAATYWCAGGYSDGTEDTFAGGTEVVVRGDPVAPT  
VLIFPPAADQVATGTVTIVCVANKYFPDVTVTWEVDGTTQTTGIENSKTPQNSADCTYNLSSTLTLTSTQYN  
SHKEYTCKVTQGTTSVVQSFNRGDC-

**SAIC-23C-35-H1, HSPB1, VSLDVNHFAPDELTVK**

>SAIC-23C-35-H1

ATG GAGACTGGGCTGCGCTGGCTTCTCCTGGTCGCTGTGCTCAAAGGTGTCCAGTGTGAGTCGGTGG  
AGGAGTCCGGGGGTGCGCTGGTCACGCCTGGGACATCCCTGACACTCACCTGCACAGCCTCTGGATT  
CTCCCTCAGTAGCTATGCAATGACCTGGGTCCGCCAGGCTCCAGGGAAGGGGCTGGAATGGATCGGA  
GCCATTGGTCTTCGTGGTACTGCATACTACGCGAGCTGGGCAACAGGCGGATTACCCATCTCCAGAAC  
CTCGACCACGGTGCATCTGAGGATCACCAGTCCGACAACCGAGGACACGGCCACCTATTTCTGTGCCA  
GAGGGGGCCTGGCCTCCGGCATGGACCCCTGGGGCCCAGGGACCCTCGTCACCGTCTCTGCA  
GGGCAACCTAAGGCTCCATCAGTCTTCCCACTGGCCCCCTGCTGCGGGGACACACCCAGCTCCACGG  
TGACCCTGGGCTGCCTGGTCAAAGGGTACCTCCCGGAGCCAGTGACCGTGACCTGGAACCTCGGGCA  
CCCTCACCAATGGGGTACGCACCTTCCCGTCCGTCCGGCAGTCCTCAGGCCTCTACTCGCTGAGCAG  
CGTGGTGAGCGTGACCTCAAGCAGCCAGCCCGTCACCTGCAACGTGGCCACCCAGCCACCAACAC  
CAAAGTGGACAAGACCGTTGCGCCCTCGACATGCAGCAAGCCCACGTGCCACCCCTGAACTCCTG  
GGGGGACCGTCTGTCTTCATCTTCCCCCAAACCAAGGACACCCTCATGATCTCACGCACCCCGA  
GGTCACATGCGTGGTGGTGGACGTGAGCCAGGATGACCCCGAGGTGCAGTTCACATGGTACATAACA  
ACGAGCAGGTGCGCACCCGCCCGCCGCTACGGGAGCAGCAGTTCAACAGCAGATCCGCGTGG  
TCAGCACCCCTCCCATCGCGCACCCAGGACTGGCTGAGGGGCAAGGAGTTCAAGTGCAAAGTCCACAA  
CAAGGCACTCCCGGCCCCCATCGAGAAAACCATCTCCAAAGCCAGAGGGCAGCCCTGGAGCCGAA  
GGTCTACACCATGGGCCCTCCCGGGAGGAGCTGAGCAGCAGGTCCGGTCAGCCTGACCTGCATGATC  
AACGGCTTCTACCCTTCCGACATCTCGGTGGAGTGGGAGAAGAACGGGAAGGCAGAGGACAATA  
AGACCACGCCGGCCGTGCTGGACAGCGACGGCTCCTACTTCTCTACAGCAAGCTCTCAGTGCCAC  
GAGTGAGTGGCAGCGGGGCGACGTCTTACCTGCTCCGTGATGCACGAGGCCCTGCACAACCACTAC  
ACGCAGAAGTCCATCTCCCGCTCTCCGGGTAAATGA

**Protein sequence:**

>SAIC-23C-35-H1

METGLRWLLLVAVLKGVQCQSVEESGGRLVTPGTSLLTCTASGFLSSYAMTWVRQAPGKLEWIGAIG  
LRGTAYYASWATGRFTISRTSTTVHLRITSPTTEDTATYFCARGGLASGMDPWGPGTLVTVSAGQPKAPSV  
FPLAPCCGDTSPSTVTLGCLVKGYLPEPVTVTWNSGTLTNGVRTFPSVRQSSGLYSLSSVSVTSSSQPV  
CNVAHPATNTKVDKTVAPSTCSKPTCPPPELLGGPSVFIFPPKPKDTLMISRTPEVTCVVDVSQDDPEVQ  
FTWYINNEQVRTARPPLREQQFNSTIRVVSTLPIAHQDWLRGKEFKCKVHNKALPAPIEKTISKARGQPLEP  
KVYTMGPPREELSSRSVSLTCMINGFYPSDISVEWEKNGKAEDNYKTTPAVLDSGDSYFLYSKLSVPTSEW  
QRGDVFTCSVMHEALHNHYTQKSISRSPGK-

**SAIC-23C-35-L2, HSPB1, VSLDVNHFAPDELTVK**

>SAIC-23C-35-L2

ATG GACACGAGGGCCCCACTCAGCTGCTGGGGCTCCTGCTGCTCTGGCTCCAGGTGCCACATTTG  
CCCAAGTGCTGACCCAGACTCCATCTCCCGTGTCTGCAGCTGTGGGAGGCACAGTCAGCATCAGTTG  
CCAGTCCAGTCAGAGTGTTTATATTAATAGTTACTTAGCCTGGTATCAGCAGAAACCAGGGCAGCCTCCC  
AAGCTCCTGATCTACAAGGCATCCACTCTGGCATCTGGGGTCCCATCGCGGTTCAAAGGCAGTGGATC  
TGGGACACAGTTCACTCTCACCATCAGCGACGTGCAGTGTGACGATGCTGCCACTTACTACTGTGCAG  
GCGCTTACGATGATAATGCAGATAATGCTTTCGGCGGAGGGACCGAGGTGGTGGTCAAG  
GGTGTCCAGTTGCACCTACTGTCCTCATCTTCCCACCAGCTGCTGATCAGGTGGCAACTGGAACAGT  
CACCATCGTGTGTGTGGCGAATAAATACTTCCCAGTGTACCGTCACCTGGGAGGTGGATGGCACCA

CCCAAACAACCTGGCATCGAGAACAGTAAACACCGCAGAATTCTGCAGATTGTACCTACAACCTCAGCA  
GCACTCTGACACTGACCAGCACACAGTACAACAGCCACAAAGAGTACACCTGCAAGGTGACCCAGGG  
CACGACCTCAGTCGTCCAGAGCTTCAATAGGGGTGACTGTAG

**Protein sequence:**

>SAIC-23C-35-L2

MDTRAPTQLLGLLLLWLPGATFAQVLTQTPSPVSAAVGGTVSISCQSSQSVYINSYLAWYQQKPGQPPKLL  
IYKASTLASGVPSRFKGSQSGTQFTLTISDVQCDDAATYYCAGAYDDNADNAFGGGTEVVVKGDPVAPT  
VLIFFPAADQVATGTVTIVCVANKYFPDVTVTWEVDGTTQTTGIENSKTPQNSADCTYNLSSTLTLTSTQYNSH  
KEYTCKVTQGTTSVVQSFNRGDC-

**SAIC-23E-30-H1, HSPB1, LFDQAFGLPR**

>SAIC-23E-30-H1

ATG GAGACTGGGCTGCGCTGGCTTCTCCTGGTCGCTGTGCTCAGAGGTGCCAGTGTGCTCAGTCGCTGG  
AGGAGTCCGGGGGTGCGCTGGTAGCGCCTGGAGGATCCCTGACACTCACCTGCACAGTCTCTGGAAT  
CGACCTCAGTAGTTATAACAATGGGCTGGGTCCGCCAGGCTCCAGGGAAGGGGCTGGAATACATTGGAT  
TCATTAGTAGGCGTCCGACCACAGCCTACGCGAGCTGGGCGAAAGGCCGATTACCATCTCCAGAACC  
TCGTCGACCACGGTGGAACTGAAAATGACCAGTCTGACAACCGAGGACACGGCCACCTATTTCTGTGC  
CAGAGAGGCATATGGTGGTAGTGCCATCTGGGGCCCAGGCACCCTGGTCACCGTCTCCTTA  
GGGCAACCTAAGGCTCCATCAGTCTTCCCACTGGCCCCCTGCTGCGGGGACACACCCAGCTCCACGG  
TGACCCTGGGCTGCCTGGTCAAAGGGTACCTCCCGGAGCCAGTGACCGTGACCTGGAACCTCGGGCA  
CCCTCACCAATGGGGTACGCACCTTCCCGTCCGTCCGGCAGTCCTCAGGCCTCTACTCGCTGAGCAG  
CGTGGTGAGCGTGACCTCAAGCAGCCAGCCCGTCACCTGCAACGTGGCCACCCAGCCACCAACAC  
CAAAGTGGACAAGACCGTTGCGCCCTCGACATGCAGCAAGCCCACGTGCCACCCCTGAACTCCTG  
GGGGGACCGTCTGTCTTCATCTTCCCCCAAACCAAGGACACCCTCATGATCTCACGCACCCCGA  
GGTCACATGCGTGGTGGTGGACGTGAGCCAGGATGACCCCGAGGTGCAGTTCACATGGTACATAACA  
ACGAGCAGGTGCGCACCCGCCCGCCGCTACGGGAGCAGCAGTTCAACAGCAGATCCGCGTGG  
TCAGCACCCCTCCCATCGCGCACCCAGGACTGGCTGAGGGGCAAGGAGTTCAAGTGCAAAGTCCACAA  
CAAGGCACTCCCGGCCCCCATCGAGAAAACCATCTCAAAGCCAGAGGGCAGCCCTGGAGCCGAA  
GGTCTACACCATGGGCCCTCCCGGGAGGAGCTGAGCAGCAGGTCCGGTCAGCCTGACCTGCATGATC  
AACGGCTTCTACCCTTCCGACATCTCGGTGGAGTGGGAGAAGAACGGGAAGGCAGAGGACAACACTACA  
AGACCACGCCGGCCGTGCTGGACAGCGACGGCTCCTACTTCTCTACAGCAAGCTCTCAGTGCCAC  
GAGTGAGTGGCAGCGGGGCGACGTCTTACCTGCTCCGTGATGCACGAGGCCTTGACAACCACTAC  
ACGCAGAAGTCCATCTCCCGCTCTCCGGGTAAATGA

**Protein sequence:**

>SAIC-23E-30-H1

METGLRWLLLVAVLRGVQCQSLEESGGRLVAPGGSLTLTCTVSGIDLSSYTMGWVRQAPGKLEYIGFISR  
RRTTAYASWAKGRFTISRTSSTTVELKMTSLTTEDTATYFCAREAYGGSIAIWGPGLVTVSLGQPKAPSVF  
PLAPCCGDTPSSTVTLGCLVKGYLPEPVTVTWNSGTLNNGVTRFSPVRQSSGLYLSVVSVTSSSQPVT  
CNVAHPATNTKVDKTVAPSTCSKPTCPPPELLGGPSVFIFPPKPKDTLMISRTPEVTCVVVDVSDDDPEVQ  
FTWYINNEQVRTARPPLREQQFNSTIRVVSTLPIAHQDWLRGKEFKCKVHNKALPAPIEKTISKARGQPLEP  
KVYTMGPPREELSSRSVSLTCMINGFYPSDISVEWEKNGKAEDNYKTTPAVLDSGDSYFLYSKLSVPTSEW  
QRGDVFTCSVMHEALHNHYTQKSISRSPGK-

**SAIC-23E-30-L4, HSPB1, LFDQAFGLPR**

>SAIC-23E-30-L4

ATG GACACGAGGGCCCCACTCAGCTGCTGGGGCTCCTGCTGCTCTGGCTCCCAGGTGCCAGATGTG  
CGCTTGTGATGACCCAGACTCCATCGTCCGTGTCTGCAGCTGTGGGAGGCACAGTCACCATCAATTGC  
CAGTCCAGTCCGAGTGTTTATAGTAACTACTTATCCTGGTATCAGCAGAAACCAGGGCAGCCTCCCAAG  
CTCCTGATCTACGAGGCATCCAACTGGCATCTGGGGTCCCATCGCGGTTCAAAGGCAGTGGATCTGG  
GACACAGTTCACTCTACCATCAGTGGCGTGGAGTGTGACGATGCTGCCACTTACTACTGTGCAGGCT  
GGAAAGATTATAATAATGATGATAATGGTTTCGGCGGAGGGACCGAGGTGGTGGTCAGA  
GGTGTCCAGTTGCACCTACTGTCCTCATCTTCCCACCAGCTGCTGATCAGGTGGCAACTGGAACAGT  
CACCATCGTGTGTGGCGAATAAATACTTTCCCGATGTCACCGTCACCTGGGAGGTGGATGGCACCA

CCCAAACAACCTGGCATCGAGAACAGTAAACACCGCAGAATTCTGCAGATTGTACCTACAACCTCAGCA  
GCACTCTGACACTGACCAGCACACAGTACAACAGCCACAAAGAGTACACCTGCAAGGTGACCCAGGG  
CACGACCTCAGTCGTCCAGAGCTTCAATAGGGGTGACTGTAG

**Protein sequence:**

>SAIC-23E-30-L4

MDTRAPTQLLGLLLLWLPGARCALVMTQTPSSVSAAVGGTVTINCQSSPSVYSNYLSWYQQKPGQPPKLLI  
YEASKLASGVPSRFKSGSGTQFTLTISGVECDAAATYYCAGWKDYNDDNGFGGGTEVVVRGDPVAPT  
VLIFPPAADQVATGTVTIVCVANKYFPDVTVTWEVDGTTQTTGIENSKTPQNSADCTYNLSSTLTLTSTQYN  
SHKEYTCKVTQGTTSVVQSFNRGDC-

**SAIC-24B-4-H2, IL18, ISTLSCENK**

>SAIC-24B-4-H2

ATG GAGACTGGGCTGCGCTGGCTTCTCCTGGTCGCTGTGCTCAAAGGTGTCCAGTGTCAAGTGGCTGG  
AGGAGTCCGGGGGTGCGCTGGTCACGCCTGGGACACCCCTGACACTCACCTGCACAACCTCTGGATT  
CTCCCTCAGTACTTATGGAGTGAGCTGGGTCCGCCAGGCTCCAGGGAAGGGGCTGGAATGGATCGGA  
TGGATTAGGGGTAGTGGTGCCACAACTACGCGAGTTGGGCGAAAGGCCGATTACCATCTCCAAAAC  
CTCGACCACGGTGAAGTGAAGTGAAGTGAAGTGAAGTGAAGTGAAGTGAAGTGAAGTGAAGTGAAGT  
GATCGCTTGTACTGGTGATAGTATAGTAATTTGTGGGGCCAGGCACCCTGGTCACCGTCTCCTCA  
GGGCAACCTAAGGCTCCATCAGTCTTCCCACTGGCCCCCTGCTGCGGGGACACACCCAGCTCCACGG  
TGACCCTGGGCTGCCTGGTCAAAGGGTACCTCCCGGAGCCAGTGACCGTGACCTGGAACCTCGGGCA  
CCCTCACCAATGGGGTACGCACCTTCCCGTCCGTCCGGCAGTCCTCAGGCCTCTACTCGCTGAGCAG  
CGTGGTGAGCGTGACCTCAAGCAGCCAGCCCGTCACCTGCAACGTGGCCACCCAGCCACCAACAC  
CAAAGTGGACAAGACCGTTGCGCCCTCGACATGCAGCAAGCCCACGTGCCACCCCTGAACTCCTG  
GGGGGACCGTCTGTCTTCATCTTCCCCCAAACCAAGGACACCCTCATGATCTCACGCACCCCGA  
GGTCACATGCGTGGTGGTGGACGTGAGCCAGGATGACCCCGAGGTGCAGTTCACATGGTACATAACA  
ACGAGCAGGTGCGCACCCGCCCGCCGCTACGGGAGCAGCAGTTCAACAGCAGATCCGCGTGG  
TCAGCACCCCTCCCATCGCGCACCCAGGACTGGCTGAGGGGCAAGGAGTTCAAGTGCAAAGTCCACAA  
CAAGGCACTCCCGGCCCCCATCGAGAAAACCATCTCCAAAGCCAGAGGGCAGCCCTGGAGCCGAA  
GGTCTACACCATGGGCCCTCCCGGGAGGAGCTGAGCAGCAGGTGCGGTCAGCCTGACCTGCATGATC  
AACGGCTTCTACCCTTCCGACATCTCGGTGGAGTGGGAGAAGAACGGGAAGGCAGAGGACAACACTACA  
AGACCACGCCGGCCGTGCTGGACAGCGACGGCTCCTACTTCTCTACAGCAAGCTCTCAGTGCCAC  
GAGTGAGTGGCAGCGGGGCGACGTCTTCACCTGCTCCGTGATGCACGAGGCCCTGCACAACCACTAC  
ACGCAGAAGTCCATCTCCCGCTCTCCGGGTAAATGA

**Protein sequence:**

>SAIC-24B-4-H2

METGLRWLLLVAVLKGVQCQSLEESGGRLVTPGTPLTLTCTTSGFSLSTYGVSWVRQAPGKGLEWIGWIR  
GSGATNYASWAKGRFTISKSTTTVTLKVTSLTTEDTATYFCARSLVTGSDSNLWPGTLVTVSSGQPKAP  
SVFPLAPCCGDTSPSTVTLGCLVKGYLPEPVTVTWNSGTLTNGVVRTFPSVRQSSGLYSLSSVSVTSSSQP  
VTCNVAHPATNTKVDKTVAPSTCSKPTCPPPELLGGPSVFIFPPKPKDTLMISRTPEVTCVVVDVSDQDDPEV  
QFTWYINNEQVRTARPLREQQFNSTIRVVSTLPIAHQDWLRGKEFKCKVHNKALPAPIEKTISKARGQPLE  
PKVYTMGPPREELSSRSVSLTCMINGFYPSDISVEWEKNGKAEDNYKTTPAVLDSGYSFLYKLSVPTSE  
WQRGDVFTCSVMHEALHNHYTQKSISRSPGK-

**SAIC-24B-4-L2, IL18, ISTLSCENK**

>SAIC-24B-4-L2

ATG GACACGAGGGCCCCACTCAGCTGCTGGGGCTCCTGCTGCTCTGGCTCCCAGGTGCCACATTTG  
CCCAAGTGCTGACCCAGACTCCATCGCCTGTGTCTGCAGCTGTGGGAGGCACAGTACCATCAATTGC  
CAGGCCAGTAAGAGTGTGGAGTAACACCCTCTTCTCCTGGTTTCAGCAGAAACCAGGGCAGCCTCC  
CAAGCGCCTGATCTATGCTGCATCCAACTGGCATCTGGGGTCCCATCGCGGTTCAAGTGGCAGTGGAT  
CTGGGACACGGTCACTCTACCATCAGCGGCGTGCAGTGTGAAGATGCTGCCACTTACTACTGTGCA  
GGCGAATTTAGTTGTAAGGATGGTGAATGTCTTGTGTTTCGGCGGAGGGACCGAGGTGGTGGTCAGA  
GGTGAATCCAGTTGCACCTACTGTCCTCATCTTCCCACCAGCTGCTGATCAGGTGGCAACTGGAACAGT  
CACCATCGTGTGTGGCGAATAAATACTTTCCCGATGTCACCGTACCTGGGAGGTGGATGGCACCA

CCCAAACAACCTGGCATCGAGAACAGTAAACACCCGCAGAATTCTGCAGATTGTACCTACAACCTCAGCA  
GCACTCTGACACTGACCAGCACACAGTACAACAGCCACAAAGAGTACACCTGCAAGGTGACCCAGGG  
CACGACCTCAGTCGTCAGAGCTTCAATAGGGGTGACTGTAG

**Protein sequence:**

>SAIC-24B-4-L2

MDTRAPTQLLGLLLLWLPGATFAQVLTQTPSPVSAVGGTVTINCQASKSVWSNTLFSWFQQKPGQPPKR  
LIYAASKLASGVPSRFSGSGSGTRFTLTISGVQCEDAATYYCAGEFSCKDGDCLVFGGGTEVVVRGDPVAP  
TVLIFPPAADQVATGTVTIVCVANKYFPDVTVTWEVDGTTQTTGIENSKTPQNSADCTYNLSSTLTLTSTQY  
NSHKEYTCKVTQGTTSVVQSFNRGDC-



**SAIC-25B-112-H1, LGALS1, SFVLNLGK**

>SAIC-25B-112-H1

ATG GAGACTGGGCTGCGCTGGCTTCTCCTGGTCGCTGTGCTCAAAGGTGTCCAGTGTCAAGTCCGGTGG  
AGGAGTCCGGGGGTGCGCTGGTCACGCCTGGGACACCCCTGACACTCACCTGCACAGCCTCTGGATT  
CACCATCAGTAGCTACCACATGCAGTGGGTCCGCCAGGCTCCAGGGAAGGGGCTGGAGTGGATCGGA  
GTCGTTAGTGATAGTGGTAGGACATACTATGCGAACTGGGCAAAGGCCGATTACCATCTCCAGAACC  
TCGACCACGGTGGATCTGAAAATGACCAGTCTGACAATCGAGGACACGGCCACCTATTTCTGTGCCAG  
AGGTGGCCACTTGTGGGGCCAGGCACCCTGGTCACCGTCTCCTCA  
GGGCAACCTAAGGCTCCATCAGTCTTCCCACTGGCCCCCTGCTGCGGGGACACACCCAGCTCCACGG  
TGACCCTGGGCTGCCTGGTCAAAGGGTACCTCCCGGAGCCAGTGACCGTGACCTGGAACCTCGGGCA  
CCCTCACCAATGGGGTACGCACCTTCCCGTCCGTCCGGCAGTCCTCAGGCCTCTACTCGCTGAGCAG  
CGTGGTGAGCGTGACCTCAAGCAGCCAGCCCGTCACCTGCAACGTGGCCACCCAGCCACCAACAC  
CAAAGTGGACAAGACCGTTGCGCCCTCGACATGCAGCAAGCCCACGTGCCACCCCTGAACTCCTG  
GGGGGACCGTCTGTCTTCATCTTCCCCCAAACCAAGGACACCCTCATGATCTCACGCACCCCGA  
GGTCACATGCGTGGTGGTGGACGTGAGCCAGGATGACCCCGAGGTGCAGTTCACATGGTACATAACA  
ACGAGCAGGTGCGCACCCGCCCGCCGCTACGGGAGCAGCAGTTCAACAGCAGATCCGCGTGG  
TCAGCACCCCTCCCATCGCGCACCCAGGACTGGCTGAGGGGCAAGGAGTTCAAGTGCAAAGTCCACAA  
CAAGGCACTCCCGGCCCCCATCGAGAAAACCATCTCAAAGCCAGAGGGCAGCCCTGGAGCCGAA  
GGTCTACACCATGGGCCCTCCCGGGAGGAGCTGAGCAGCAGGTCCGGTCAGCCTGACCTGCATGATC  
AACGGCTTCTACCCTTCCGACATCTCGGTGGAGTGGGAGAAGAACGGGAAGGCAGAGGACAACACTACA  
AGACCACGCCGGCCGTGCTGGACAGCGACGGCTCCTACTTCTCTACAGCAAGCTCTCAGTGCCAC  
GAGTGAGTGGCAGCGGGGCGACGTCTTCACCTGCTCCGTGATGCACGAGGCCTTGACAACCACTAC  
ACGCAGAAGTCCATCTCCCGCTCTCCGGGTAAATGA

**Protein sequence:**

>SAIC-25B-112-H1

METGLRWLLLVAVLKGVQCQSVEESGGRLVTPGTLTLTCTASGFTISSYHMQWVRQAPGKGLEWIGVVS  
DSGRYYANWAKGRFTISRTSTTVDLKMTSLTIEDTATYFCARGGHLWGPGLTVTVSSGQPKAPSVFPLAP  
CCGDPSSSTVTLGCLVKGYLPEPVTVTWNSGTLTNGVRTFPSVRQSSGLYSLSSVSVTSSSQPVTCNVA  
HPATNTKVDKTVAPSTCSKPTCPPPELLGGPSVFIFPPKPKDTLMISRTPEVTCVVDVSDQDDPEVQFTWYI  
NNEQVRTARPPLREQQFNSTIRVVSTLPIAHQDWLRGKEFKCKVHNKALPAPIEKTISKARGQPLEPKVYTM  
GPPREELSSRSVSLTCMINGFYPSDISVEWEKNGKAEDNYKTTPAVLDSGYSFLYSKLSVPTSEWQRGD  
VFTCSVMHEALHNHYTQKSISRSPGK-

**SAIC-25B-112-L1, LGALS1, SFVLNLGK**

>SAIC-25B-112-L1

ATG GACACGAGGGCCCCACTCAGCTGCTGGGGCTCCTGCTGCTCTGGCTCCAGGTGCCACATTTG  
CTCAAGTGCTGACCCAGACTCCATCCCCGTGTCTGCGGCTGTGGGAGGCACAGTACCATGAAGTG  
CCAGTCCAGTCCGAGTGTTCTAATAACTACTTGTCTGGTTTCAGCAGAAACCAGGGCAGCCTCCCA  
AGCAACTGATCTATGATGCATCCACTCTGGCATCTGGGGTCCCATCGCGGTTCAAAGGCAGTGGATCT  
GGGACACAGTTCGCTCTACCATCAGCGACGTGCAGTGTGACGATGCTGCCACTTACTACTGTCTAGG  
TAGTTATGATTGTAATAGTGGTGATTGTGGTGCTTTCGGCGGAGGGACCGAGGTGGTGGTCAAA  
GGTGATCCAGTTGCACCTACTGTCCTCATCTTCCCACCAGCTGCTGATCAGGTGGCAACTGGAACAGT  
CACCATCGTGTGTGTGGCGAATAAATACTTTCCCGATGTCACCGTACCTGGGAGGTGGATGGCACCA

CCCAAACAACCTGGCATCGAGAACAGTAAACACCCGCAGAATTCTGCAGATTGTACCTACAACCTCAGCA  
GCACTCTGACACTGACCAGCACACAGTACAACAGCCACAAAGAGTACACCTGCAAGGTGACCCAGGG  
CACGACCTCAGTCGTCCAGAGCTTCAATAGGGGTGACTGTAG

**Protein sequence:**

>SAIC-25B-112-L1

MDTRAPTQLLGLLLLWLPGATFAQVLTQTPSPVSAVGGTVTMKCQSSPSVPNNYLSWFQQKPGQPPKQ  
LIYDASTLASGVPSRFKGSQSGTQFALTISDVQCDDAATYYCLGSYDCNSGDCGAFGGGTEVVVKGDPVA  
PTVLIFPPAADQVATGTVTIVCVANKYFPDVTVTWEVDGTTQTTGIENSKTPQNSADCTYNLSSTLTLTSTQ  
YNSHKEYTCKVTQGTTSVVQSFNRGDC-

**SAIC-26C-15-H2, NFKB2, IEVDLVTHSDPPR**

>SAIC-26C-15-H2

ATG GAGACTGGGCTGCGCTGGCTTCTCCTGGTCGCTGTGCTCAAAGGTGTCCAGTGTCAAGTGGTGG  
AGGAGTCCGGGGTTCGCTGGTCAAGCCTGGGACAGCCCTGACACTCACCTGCACAGTCTCTGGATT  
CTCCCTCAATGACCATACAATGACCTGGGTCCGCCAGGCTCCAGGGAAGGGGCTGGAATGGATCGGAT  
CGATTGCTAGTATTGGTACTACCAACTACGCGAACTGGGCGAAAGGCCGATTACCCATCTCCAAAACCT  
CGACCACGGTGGATCTGAAAATCACCAGTCCGACAACCGAGGACACGGCCACCTATTTCTGTGCCAGA  
GGCTATGCTGGTAGTAGATTGTGGGGCCCAGGCACCCTGGTCACCGTCTCCTCA  
GGGCAACCTAAGGCTCCATCAGTCTTCCCCTGGCCCCCTGCTGCGGGGACACACCCAGCTCCACGG  
TGACCCTGGGCTGCCTGGTCAAAGGGTACCTCCCGGAGCCAGTGACCGTGACCTGGAACCTCGGGCA  
CCCTCACCAATGGGGTACGCACCTTCCCGTCCGTCCGGCAGTCCTCAGGCCTCTACTCGCTGAGCAG  
CGTGGTGGAGCGTGACCTCAAGCAGCCAGCCCGTCACCTGCAACGTGGCCACCCAGCCACCAACAC  
CAAAGTGGACAAGACCGTTGCGCCCTCGACATGCAGCAAGCCCACGTGCCACCCCTGAACTCCTG  
GGGGACCGTCTGTCTTCATCTTCCCCCAAACCAAGGACACCCTCATGATCTCACGCACCCCGA  
GGTCACATGCGTGGTGGTGGACGTGAGCCAGGATGACCCCGAGGTGCAGTTCACATGGTACATAACA  
ACGAGCAGGTGCGCACCCGCCCGCCGCTACGGGAGCAGCAGTTCAACAGCAGATCCGCGTGG  
TCAGCACCCCTCCCATCGCGCACCCAGGACTGGCTGAGGGGCAAGGAGTTCAAGTGCAAAGTCCACAA  
CAAGGCACTCCCGGCCCCCATCGAGAAAACCATCTCCAAAGCCAGAGGGCAGCCCTGGAGCCGAA  
GGTCTACACCATGGGCCCTCCCGGGAGGAGCTGAGCAGCAGGTCCGGTCAGCCTGACCTGCATGATC  
AACGGCTTCTACCCTTCCGACATCTCGGTGGAGTGGGAGAAGAACGGGAAGGCAGAGGACAACACTACA  
AGACCACGCCGGCCGTGCTGGACAGCGACGGCTCCTACTTCTCTACAGCAAGCTCTCAGTGCCAC  
GAGTGAGTGGCAGCGGGGCGACGTCTTCACCTGCTCCGTGATGCACGAGGCCCTGCACAACCACTAC  
ACGCAGAAGTCCATCTCCCGCTCTCCGGGTAAATGA

**Protein sequence:**

>SAIC-26C-15-H2

METGLRWLLLVAVLKGVQCQSVEESGGRLVTPGTALTLTCTVSGFSLNDHTMTWVRQAPGKGLEWIGSIA  
SIGTTNYANWAKGRFTISKSTTTVDLKITSPTTEDTATYFCARGYAGSRLWGPGLVTVSSGQPKAPSVFPL  
APCCGDTPSSTVTLGCLVKGYLPEPVTVTWNSGLTNGVVRTFPSVRQSSGLYLSVSVTSSSQPVTCN  
VAHPATNTKVDKTVAPSTCSKPTCPPPELLGGPSVFIFPPKPKDTLMISRTPEVTCVVVDVSDQDDPEVQFT  
WYINNEQVRTARPLREQQFNSTIRVVSTLPIAHQDWLRGKEFKCKVHNKALPAPIEKTISKARGQPLEPKV  
YTMGPPREELSSRSVSLTCMINGFYPSDISVEWEKNGKAEDNYKTTPAVLDSGYSYFLYSKLSVPTSEWQ  
RGDVFTCSVMHEALHNHYTQKSISRSPGK-

**SAIC-26C-15-L15, NFKB2, IEVDLVTHSDPPR**

>SAIC-26C-15-L15

ATG GACACGAGGGCCCCACTCAGCTGCTGGGGCTCCTGCTGCTCTGGCTCCAGGTGCCACATTTG  
CCCAAGTGCTGACCCAGACTCCATCCTCCGTGTCTGCAGCTGTGGGAGGCACAGTACCATCAATTGC  
CAGTCCAGTCAGAGTGTTTATAATAAGAACTACTTAGCCTGGTTTCAGCAGAAACCAGGGCAGCCTCCC  
AAGCTCCTGATGTATGATGCATCCAATCTGGAACTGGGGTCCCATCGCGATTCAAAGGCAGTGGATCT  
GGGACACAGTTCCTACTCTCACCATCAGCGGCGTGACGTGTGACGATGCTGCCACTTACTACTGTCAAGG  
CACTTATTATAGTAGTGGTTGGTACCTTGCTTTCGGCGGAGGGACCGAGGTGGTGGTCAAA  
GGTGTCCAGTTGCACCTACTGTCCTCATCTTCCCACCAGCTGCTGATCAGGTGGCAACTGGAACAGT  
CACCATCGTGTGTGGCGAATAAATACTTCCCGATGTCACCGTACCTGGGAGGTGGATGGCACCA

CCCAAACAACCTGGCATCGAGAACAGTAAACACCCGCAGAATTCTGCAGATTGTACCTACAACCTCAGCA  
GCACTCTGACACTGACCAGCACACAGTACAACAGCCACAAAGAGTACACCTGCAAGGTGACCCAGGG  
CACGACCTCAGTCGTCAGAGCTTCAATAGGGGTGACTGTAG

**Protein sequence:**

>SAIC-26C-15-L15

MDTRAPTQLLGLLLLWLPGATFAQVLTQTPSSVSAVGGTVTINCQSSQSVYNKNYLAWFQQKPGQPPKL  
LMYDASNLETGVPSRFKSGSGTQFTLTISGVQCDDAATYYCQGTYYSSGWYLAFGGGTEVVVKGDPVA  
PTVLIFPPAADQVATGTVTIVCVANKYFPDVTVTWEVDGTTQTTGIENSKTPQNSADCTYNLSSTLTLTSTQ  
YNSHKEYTCKVTQGTTSVVQSFNRGDC-

**SAIC-27C-101-H1, PCNA, LVQGSILK**

>SAIC-27C-101-H1

ATG GAGACTGGGCTGCGCTGGCTTCTCCTGGTCGCTGTGCTCAAAGGTGTCCAGTGTCCAGGAGCAGC  
TGAAGGAGTCCGGAGGAGGCCTGGTAACGCCTGGAGGAACCCTGACACTCACCTGCACAGCCTCTG  
GAATCGACCTCAGTAGCAATGCAATGAGCTGGGTCCGCCAGGCTCCAGGGGAGGGGGCTGGAATGGAT  
CGGAATCAATAATAGTGGTGGCAGGGTATATTACGCGAGCTGGGCAAAGGCCGATTACCATCTCCAA  
AACCTCGACCACGGTGGCTCTGAAAATGACCAGTCTGACAGCCGCGGACACGGCCACCTATTTCTGTG  
CCAGAGGAGATACTACTGTCCCCTTTACGTTGTGGGGCCCAGGCACCCTGGTCACCGTCTCCTCA  
GGGCAACCTAAGGCTCCATCAGTCTTCCCCTGGCCCCCTGCTGCGGGGACACACCCAGCTCCACGG  
TGACCCTGGGCTGCCTGGTCAAAGGGTACCTCCCGGAGCCAGTGACCGTGACCTGGAACCTCGGGCA  
CCCTCACCAATGGGGTACGCACCTTCCCGTCCGTCCGGCAGTCCTCAGGCCTCTACTCGCTGAGCAG  
CGTGGTGAGCGTGACCTCAAGCAGCCAGCCCGTCACCTGCAACGTGGCCACCCAGCCACCAACAC  
CAAAGTGGACAAGACCGTTGCGCCCTCGACATGCAGCAAGCCCACGTGCCACCCCCCTGAACTCCTG  
GGGGGACCGTCTGTCTTCATCTTCCCCCAAACCAAGGACACCCTCATGATCTCACGCACCCCCGA  
GGTCACATGCGTGGTGGTGGACGTGAGCCAGGATGACCCCGAGGTGCAGTTCACATGGTACATAAACA  
ACGAGCAGGTGCGCACCCGCCCGCCGCTACGGGAGCAGCAGTTCAACAGCAGATCCGCGTGG  
TCAGCACCCCTCCCATCGCGCACCCAGGACTGGCTGAGGGGCAAGGAGTTCAAGTGCAAAGTCCACAA  
CAAGGCACTCCCGGCCCCCATCGAGAAAACCATCTCAAAGCCAGAGGGCAGCCCTGGAGCCGAA  
GGTCTACACCATGGGCCCTCCCGGGAGGAGCTGAGCAGCAGGTCCGGTCAGCCTGACCTGCATGATC  
AACGGCTTCTACCCTTCCGACATCTCGGTGGAGTGGGAGAAGAACGGGAAGGCAGAGGACAACACTACA  
AGACCACGCCGGCCGTGCTGGACAGCGACGGCTCCTACTTCTCTACAGCAAGCTCTCAGTGCCAC  
GAGTGAGTGGCAGCGGGGCGACGTCTTACCTGCTCCGTGATGCACGAGGCCCTGCACAACCACTAC  
ACGCAGAAGTCCATCTCCCGCTCTCCGGGTAAATGA

**Protein sequence:**

>SAIC-27C-101-H1

METGLRWLLLVAVLKGVQCQEQLKESGGGLVTPGGTLTLTCTASGIDLSSNAMSWVRQAPGEGLEWIGIN  
NSGGRVYYASWAKGRFTISKSTTTVALKMTSLTAADTATYFCARGDTPFTLWPGTLVTVSSGQPKAP  
SVFPLAPCCGDTSPSTVTLGCLVKGYLPEPVTVTWNSGTLTNGVVRTFPSVRQSSGLYSLSSVSVTSSSQP  
VTCNVAHPATNTKVDKTVAPSTCSKPTCPPPELLGGPSVFIFPPKPKDTLMISRTPEVTCVVVDVSDQDPEV  
QFTWYINNEQVRTARPLREQQFNSTIRVVSTLPIAHQDWLRGKEFKCKVHNKALPAPIEKTISKARGQPLE  
PKVYTMGPPREELSSRSVSLTCMINGFYPSDISVEWEKNGKAEDNYKTPAVLDSGYSFLYKLSVPTSE  
WQRGDVFTCSVMHEALHNHYTQKSISRSPGK-

**SAIC-27C-101-L4, PCNA, LVQGSILK**

>SAIC-27C-101-L4

ATG GCCTGCACCCCGCTCCTCCTCCTCACCCTCCTCCAGAGCACAGGGTCCCTGTCTCAGCCTG  
TGCTGACTCAGTCGCCCTCTGCATCTGCCACCCTGGGAGCCTCGGCCAAGCTCACCTGCACTCTGAG  
CAGTGCCACAGAACCTACTATATTGAATGGTATCAGCAGCAGCAAGGGGAGGCCCTCGGTACCTGA  
TGCAGCTTAAGAGTGATGGAAGCTACACCAAGGGGACCGGGGTCCCTGATCGCTTCTCGGGCTCCAG  
CTCTGGGGCTGACCGCTACTTGATCATCTCCAGCGTCCAGGCTGAGGACGAAGCTGACTACATCTGTG  
GTGTAAGTACTGACTGGTCTTTATGTTTTCGGCGGAGGGACCCAGCTGACCGTCACAGGTCAGCCCGC  
GGTGACC  
CCCTCGGTCATTCTGTTCCCGCCCTCCTCTGAGGAACTCAAGGACAACAAGGCTACCCTGGTGTGTCT  
GATCAATGACTTCTACCCAGAACCGTGAAGGTAACTGGAAGGCAGATGGCAACTCTGTACCCAGG

GCGTGGACACCACCCAGCCCTCCAAACAGAGCAACAACAAGTACGCGGCCAGCAGCTTCCTCAGCCT  
GTCAGCCAATCAATGGAAATCCTACCAGAGTGTACCTGCCAGGTCACGCACGAGGGCCACACTGTG  
GAGAAGAGCCTGGCCCCTGCAGAATGCTCC**TAG**

**Protein sequence:**

>SAIC-27C-101-L4

MACTPLLLLLLTLQSTGSLSQPVLTQSPSASATLGASAKLTCTLSSAHRYYIEWYQQQQGEAPRYLMQLK  
SDGSYTKGTGVPDRFSGSSSGADRYLISSVQAEDEADYICGVTDGLYVFGGGTQLTVTGQPAVT  
PPSSEELKDNKATLVCLINDFYPRTVKVNWKADGNSVTQGVDTTQPSKQSNNKYAASSFLSLSANQWKS  
YQSVTCQVTHEGHTVEKSLAPAEC-

**SAIC-28A-29-H2, RAD23B, ILNDDTALK**

>SAIC-28A-29-H2

ATG GAGACTGGGCTGCGCTGGCTTCTCCTGGTCGCTGTGCTCAAAGGTGTCCAGTGTGTCAGTCGGTGG  
AGGAGTCCGGGGGTGCGCTGGTAGCGCCTGGAGGATCCCTGACACTCACCTGCACAGTCTCTGGAAT  
CGACATCAGTAATTATCCAGTGGGCTGGGTCCGCCAGGCTCCAGGGAAGGGGCTGGAATGGATCGGA  
GCCATTAGTGATGTTGGTATTACATACTACGCGAGCTGGGCGAAAGGCCGATTACCATCTCCAGAGCC  
TCGTCGACCACGGTGGATCTGAAAATGACCAGTACGACAACCGAGGACACGGCCACCTATTTTTGTGC  
CAGAGGGTTTGTGGTGGTAGTAGTTCAAGTAACTTGTGGGGCCAGGCACCCTGGTCACCGTCTCCT  
CA

GGGCAACCTAAGGCTCCATCAGTCTTCCCACTGGCCCCCTGCTGCGGGGACACACCCAGCTCCACGG  
TGACCCTGGGCTGCCTGGTCAAAGGGTACCTCCCGGAGCCAGTGACCGTGACCTGGAACCTCGGGCA  
CCCTACCAATGGGGTACGCACCTTCCCGTCCGTCCGGCAGTCCCTCAGGCCTCTACTCGCTGAGCAG  
CGTGGTGAAGCGTGACCTCAAGCAGCCAGCCCGTCACTGCAACGTGGCCACCCAGCCACCAACAC  
CAAAGTGGACAAGACCGTTGCGCCCTCGACATGCAGCAAGCCCACGTGCCACCCCTGAACTCCTG  
GGGGACCGTCTGTCTTTCATCTTCCCCCAAACCAAGGACACCCTCATGATCTCACGCACCCCGA  
GGTCACATGCGTGGTGGTGGACGTGAGCCAGGATGACCCCGAGGTGCAGTTCACATGGTACATAAACA  
ACGAGCAGGTGCGCACCGCCCGGCCGCGCTACGGGAGCAGCAGTTCAACAGCAGCAGTCCGCGTGG  
TCAGCACCCCTCCCATCGCGCACCAAGGACTGGCTGAGGGGCAAGGAGTTCAAGTGCAAAGTCCACAA  
CAAGGCACTCCCGGCCCCCATCGAGAAAACCATCTCAAAGCCAGAGGGCAGCCCTGGAGCCGAA  
GGTCTACACCATGGGCCCTCCCGGGAGGAGCTGAGCAGCAGGTCCGGTCAGCCTGACCTGCATGATC  
AACGGCTTCTACCCTTCCGACATCTCGGTGGAGTGGGAGAAGAACGGGAAGGCAGAGGACAACACTACA  
AGACCACGCCGGCCGTGCTGGACAGCGACGGCTCTACTTCTCTACAGCAAGCTCTCAGTGCCAC  
GAGTGAGTGGCAGCGGGGCGACGTCTTACCTGCTCCGTGATGCACGAGGCCTTGACAACCACTAC  
ACGCAGAAGTCCATCTCCCGCTCTCCGGGTAAATGA

**Protein sequence:**

>SAIC-28A-29-H2

METGLRWLLLVAVLKGVQCQSVEESGGRLVAPGGSLTCTVSGIDISNYPVGVWRQAPGKLEWIGAISD  
VGITYYASWAKGRFTISRASSTTVDLKMTSTTTEDTATYFCARGFVGGSSSSNLWGPGLVTVSSGQPKAP  
SVFPLAPCCGDTSPSTVTLGCLVKGYLPEPVTVTWNSGLTNGVRTFPSVRQSSGLYSLSSVSVTSSSQP  
VTCNVAHPATNTKVDKTVAPSTCSKPTCPPPELLGGPSVFIFFPKPKDTLMISRTPEVTCVVVDVSQDDPEV  
QFTWYINNEQVRTARPLREQQFNSTIRVVSTLPIAHQDWLRGKEFKCKVHNKALPAIEKTISKARGQPLE  
PKVYTMGPPREELSSRSVSLTCMINGFYPSDISVEWEKNGKAEDNYKTPAVLDSGYSFLYSKLSVPTSE  
WQRGDVFTCSVMHEALHNHYTQKSISRSPGK-

**SAIC-28A-29-L3, RAD23B, ILNDDTALK**

>SAIC-28A-29-L3

ATG GACACGAGGGCCCCCACTCAGCTGCTGGGGCTCCTGCTGCTCTGGCTCCAGGTGCCACATTTG  
CGCAAGTGCTGACCCAGGCTGCATCGTCCGTGTCTGCAGCTGTGGGAGGCACAGTCACCATCAGTTG  
CCAGTCCAGTCAGAGTGTTATAATAACAACAACCTTAGGCTGGTTTCAGCAGAAACCAGGGCAGCCTCC  
CAAGCGCCTGATCTATAGGGCATCCAATCTGGAATCTGGGGTCCCATCGCGGTTCAAAGGCACTGGAT  
CTGGGACACAGTTCCTCCTCACCATCAGTGACCTGCAGTGTGACGATGCTGCCACTTACTACTGTGCA  
GGCGCTTATAGTGGTAACATTGGTGCTTTCGGCGGAGGGACCGAGGTGGTGGTCAAA  
GGTGTCCAGTTGCACCTACTGTCCTCATCTTCCACCAGCTGCTGATCAGGTGGCAACTGGAACAGT

CACCATCGTGTGTGTGGCGAATAAATACTTTCCCGATGTCACCGTCACCTGGGAGGTGGATGGCACCA  
CCCAAACAACCTGGCATCGAGAACAGTAAACACCGCAGAATTCTGCAGATTGTACCTACAACCTCAGCA  
GCACTCTGACACTGACCAGCACACAGTACAACAGCCACAAAGAGTACACCTGCAAGGTGACCCAGGG  
CACGACCTCAGTCGTCCAGAGCTTCAATAGGGGTGACTGTAG

**Protein sequence:**

>SAIC-28A-29-L3

MDTRAPTQLLGLLLLWLPGATFAQVLTQAASSVSAAVGGTVTISCQSSQSVYNNNNLWGFQQKPGQPPKR  
LIYRASNLESGVPSRFKGTGSGTQFTLTISDLQCDDAATYYCAGAYSGNIGAFGGGTEVVVKGDPVAPTVLI  
FPPAADQVATGTVTIVCVANKYFPDVTVTWEVDGTTQTTGIENSKTPQNSADCTYNLSSTLTLTSTQYN  
SH  
KEYTCKVTQGTTSVVQSFNRGDC-



**SAIC-28B-8-H5, RAD23B, IDIDPEETVK**

>SAIC-28B-8-H5

ATG GAGACTGGGCTGCGCTGGCTTCTCCTGGTCGCTGTGCTCAAAGGTGTCCAGTGTGTCAGTCGGTGA  
AGGAGTCCGAGGGAGGCCTGTTCAAGCCTGGGGGATCCCTGACACTCACCTGCACAGTCTCTGGATT  
CTCCCTCAGTATCAATGCAATAACCTGGGTCCGCCAGGCTCCAGGGAACGGGCTGGAATGGATCGGAG  
CCATTGATATTAGTGGTACCGGATACTACGCGACTTGGGCGGAAAGCCGATCCACCATCACCAGAAACA  
CCAACCTGAATACGGTGACTCTGAAAATGACCAGGCTGACAGCCGCGGACACGGCCACCTATTTCTGT  
GCGAGAGGTGGTATTACTAGGATTA ACTTGTGGGGGCCAGGCACCCTGGTCACCGTCTCCTCA  
GGGCAACCTAAGGCTCCATCAGTCTTCCCACTGGCCCCCTGCTGCGGGGACACACCCAGCTCCACGG  
TGACCCTGGGCTGCCTGGTCAAAGGGTACCTCCCGGAGCCAGTGACCGTGACCTGGA ACTCGGGCA  
CCCTCACCAATGGGGTACGCACCTTCCCGTCCGTCCGGCAGTCCTCAGGCCTCTACTCGCTGAGCAG  
CGTGGTGAGCGTGACCTCAAGCAGCCAGCCCGTCACCTGCAACGTGGCCACCCAGCCACCAACAC  
CAAAGTGGACAAGACCGTTGCGCCCTCGACATGCAGCAAGCCACGTGCCACCCCTGAACTCCTG  
GGGGGACCGTCTGTCTTCATCTTCCCCCAAACCAAGGACACCCTCATGATCTCACGCACCCCGA  
GGTCACATGCGTGGTGGTGGACGTGAGCCAGGATGACCCCGAGGTGCAGTTCACATGGTACATAACA  
ACGAGCAGGTGCGCACCCGCCCGCCGCTACGGGAGCAGCAGTTCAACAGCAGATCCGCGTGG  
TCAGCACCCCTCCCATCGCGCACCCAGGACTGGCTGAGGGGCAAGGAGTTCAAGTGCAAAGTCCACAA  
CAAGGCACTCCCGGCCCCCATCGAGAAAACCATCTCAAAGCCAGAGGGCAGCCCTGGAGCCGAA  
GGTCTACACCATGGGCCCTCCCGGGAGGAGCTGAGCAGCAGGTCCGGTCAGCCTGACCTGCATGATC  
AACGGCTTCTACCCTTCCGACATCTCGGTGGAGTGGGAGAAGAACGGGAAGGCAGAGGACA ACTACA  
AGACCACGCCGGCCGTGCTGGACAGCGACGGCTCCTACTTCTCTACAGCAAGCTCTCAGTGCCAC  
GAGTGAGTGGCAGCGGGGCGACGTCTTCACCTGCTCCGTGATGCACGAGGCCTTGACAACCACTAC  
ACGCAGAAGTCCATCTCCCGCTCTCCGGGTAAATGA

**Protein sequence:**

>SAIC-28B-8-H5

METGLRWLLLVAVLKGVQCQSVKESEGGLFKPGGSLTLTCTVSGFSLSINAITWVRQAPNGLEWIGIDIS  
GTGYYATWAESRSTITRNTNLNTVTLKMTRLTAADTATYFCARGGITRINLWGPGLVTVSSGQPKAPSVF  
PLAPCCGDTPSSTVTLGCLVKGYLPEPVVTWNSGTLNNGVRFPSVRQSSGLYLSVVSVTSSSQPVT  
CNVAHPATNTKVDKTVAPSTCSKPTCPPPELLGGPSVFIFPPKPKDTLMISRTPEVTCVVVDVSQDDPEVQ  
FTWYINNEQVRTARPPLREQQFNSTIRVVSTLPIAHQDWLRGKEFKCKVHNKALPAPIEKTISKARGQPLEP  
KVYTMGPPREELSSRSVSLTCMINGFYPSDISVEWEKNGKAEDNYKTTPAVLDSGDSYFLYSKLSVPTSEW  
QRGDVFTCSVMHEALHNHYTQKSISRSPGK-

**SAIC-28B-8-L3, RAD23B, IDIDPEETVK**

>SAIC-28B-8-L3

ATG GACACGAGGGCCCCACTCAGCTGCTGGGGCTCCTGCTGCTCTGGCTCCAGGTGCCACATTTG  
CCGCCGTGCTGACCCAGACTGCATCCCCGTGTCTGCAGCTGTGGGAGGCACAGTCAGCATCAGTTG  
CCAGTCCAGTAAGAGTGTTTATAAGAACA ACTACTTAGCCTGGTTTCAGCAGAAACCAGGGCAGCCTCC  
CAA ACTCCTGATCTATTATGCATCCACTCTGGCATCTGGGGTCCCATCGCGCTTCAAAGGCAGTGGATC  
TGGGACACAGTTC ACTCTCACCATCAGCGACGTGCAGTGTGGCGATGCTGCCACTTATTACTGTGCAG  
GCGCTTATAATAGTAATAGTGATAATGCTTTCGGCGGAGGGACCGAGGTGGTGGTCAA  
GGTGATCCAGTTGCACCTACTGTCCTCATCTTCCCACCAGCTGCTGATCAGGTGGCAACTGGAACAGT  
CACCATCGTGTGTGTGGCGAATAAATACTTCCCAGTGTACCGTCACCTGGGAGGTGGATGGCACCA

CCCAAACAACCTGGCATCGAGAACAGTAAACACCGCAGAATTCTGCAGATTGTACCTACAACCTCAGCA  
GCACTCTGACACTGACCAGCACACAGTACAACAGCCACAAAGAGTACACCTGCAAGGTGACCCAGGG  
CACGACCTCAGTCGTCCAGAGCTTCAATAGGGGTGACTGTAG

**Protein sequence:**

>SAIC-28B-8-L3

MDTRAPTQLLGLLLLWLPGATFAAVLTQTASPVSAAVGGTVSISCQSSKSVYKNNYLAWFQQKPGQPPKLL  
IYYASTLASGVPSRFKGSQSGTQFTLTISDVQCDAATYYCAGAYNSNSDNAFGGGTEVVVKGDPVAPT  
VLIFFPAADQVATGTVTIVCVANKYFPDVTVTWEVDGTTQTTGIENSKTPQNSADCTYNLSSTLTLTSTQYN  
SHKEYTCKVTQGTTSVVQSFNRGDC-

**SAIC-30C-18-H1**, RRM2, IEQEFLTEALPVK

>SAIC-30C-18-H1

ATG GAGACTGGGCTGCGCTGGCTTCTCCTGGTCGCTGTGCTCAAAGGTGTCCAGTGTCAAGTTCGATGG  
AGGAGTCCGGGGTTCGCTGGTACGCCTGGGACACCCCTGACACTCACCTGTAAAGTCTCTGGATT  
CTCCCTCAGTGGCTTTGGAATAAGCTGGGTCCGCCAGGCTCCAGGGAAGGGGCTGCAATGGATCGGA  
ATCATTAGTAGTACTGGTAACACATACTACGCGAGCTGGGCGAAGGGCCGATTACCGTCTCAAATCC  
TCGTGACCACGGTGGACCTGAAAATGACCGGTCTGACAACCGAGGACACGGCCACCTATTTCTGTAC  
CAGAGGATGGGCTGGTGGTTTTGCTCCCTGGGGCCCAGGCGCCCTGGTCACCGTCTCCTCA  
GGGCAACCTAAGGCTCCATCAGTCTTCCCACTGGCCCCCTGCTGCGGGGACACACCCAGCTCCACGG  
TGACCCTGGGCTGCCTGGTCAAAGGGTACCTCCCGGAGCCAGTGACCGTGACCTGGAACCTCGGGCA  
CCCTCACCAATGGGGTACGCACCTTCCCGTCCGTCCGGCAGTCCTCAGGCCTCTACTCGCTGAGCAG  
CGTGGTGAGCGTGACCTCAAGCAGCCAGCCCGTCACCTGCAACGTGGCCACCCAGCCACCAACAC  
CAAAGTGGACAAGACCGTTGCGCCCTCGACATGCAGCAAGCCCACGTGCCACCCCTGAACTCCTG  
GGGGACCGTCTGTCTTCATCTTCCCCCAAACCAAGGACACCCTCATGATCTCACGCACCCCGA  
GGTCACATGCGTGGTGGTGGACGTGAGCCAGGATGACCCCGAGGTGCAGTTCACATGGTACATAACA  
ACGAGCAGGTGCGCACCCGCCCGCCGCTACGGGAGCAGCAGTTCAACAGCACGATCCGCGTGG  
TCAGCACCTCCCATCGCGCACCCAGGACTGGCTGAGGGGCAAGGAGTTCAAGTGCAAAGTCCACAA  
CAAGGCACTCCCGGCCCCCATCGAGAAAACCATCTCAAAGCCAGAGGGCAGCCCTGGAGCCGAA  
GGTCTACACCATGGGCCCTCCCGGGAGGAGCTGAGCAGCAGGTCCGGTCAGCCTGACCTGCATGATC  
AACGGCTTCTACCCTTCCGACATCTCGGTGGAGTGGGAGAAGAACGGGAAGGCAGAGGACAACACTACA  
AGACCACGCCGGCCGTGCTGGACAGCGACGGCTCCTACTTCTCTACAGCAAGCTCTCAGTGCCAC  
GAGTGAGTGGCAGCGGGGCGACGTCTTACCTGCTCCGTGATGCACGAGGCCCTGCACAACCACTAC  
ACGCAGAAGTCCATCTCCCGCTCTCCGGGTAAATGA

**Protein sequence:**

>SAIC-30C-18-H1

METGLRWLLLVAVLKGVQCQSMEESGGRLVTPGTPLTLTCKVSGFSLSGFGISWVRQAPGKGLQWIGIIS  
TGNTYYASWAKGRFTVSKSSSTTVDLKMTGLTTEDTATYFCTRGWAGGFAPWGPALVTVSSGQPKAPS  
VFPLAPCCGDTPSSTVTLGCLVKGYLPEPVTVTWNSGTLTNGVRTFPSVRQSSGLYSLSSVSVTSSSQPV  
TCNVAHPATNTKVDKTVAPSTCSKPTCPPPELLGGPSVFIFPPKPKDTLMISRTPEVTCVVVDVSDDDPEV  
QFTWYINNEQVRTARPLREQQFNSTIRVVSTLPIAHQDWLRGKEFKCKVHNKALPAPIEKTISKARGQPLE  
PKVYTMGPPREELSSRSVSLTCMINGFYPSDISVEWEKNGKAEDNYKTPAVLSDSGSYFLYSLKLSVPTSE  
WQRGDVFTCSVMHEALHNHYTQKSISRSPGK-

**SAIC-30C-18-L3**, RRM2, IEQEFLTEALPVK

>SAIC-30C-18-L3

ATG GACACGAGGGCCCCACTCAGCTGCTGGGGCTCCTGCTGCTCTGGCTCCAGGTGCCATATGTG  
ACCCTGTGATGACCCAGACTCCATCTTCCACGTCTGCGGCTGTGGGAGGCACAGTCAGCATCAGTTGC  
CAGTCCAGTCAGAGTGTTTATAGTAACTACTTATCCTGGTATCAGCAGAAACCAGGGCAGCCTCCCAAG  
CTCCTGATCTACAAGGCATCCACTCTGGCATCTGGGGTCCCATCGCGGTTCAAAGGCAGTGGATCTGG  
GACACAGTTCACTCTACCATCAGCGACGTGCAGTGTGACGATGCTGCCACTTACTACTGTCAAGGCA  
TTTATAGTGGTAATATTTACGGTTTCGGCGGAGGGACCGAGGTGGTGGTTAAA  
GGTGTCCAGTTGCACCTACTGTCCTCATCTTCCCACCAGCTGCTGATCAGGTGGCAACTGGAACAGT  
CACCATCGTGTGTGGCGAATAAATACTTTCCCGATGTCACCGTACCTGGGAGGTGGATGGCACCA

CCCAAACAACCTGGCATCGAGAACAGTAAACACCGCAGAATTCTGCAGATTGTACCTACAACCTCAGCA  
GCACTCTGACACTGACCAGCACACAGTACAACAGCCACAAAGAGTACACCTGCAAGGTGACCCAGGG  
CACGACCTCAGTCGTCCAGAGCTTCAATAGGGGTGACTGTAG

**Protein sequence:**

>SAIC-30C-18-L3

MDTRAPTQLLGLLLLWLPGAICDPVMTQTPSSTSAAVGGTVSISCQSSQSVYSNYLSWYQQKPGQPPKLLI  
YKASTLASGVPSRFRKSGSGTQFTLTISDVQCDDAATYYCQGIYSGNIYGFGGGTEVVVKGDPVAPTVLIFP  
PAADQVATGTVTIVCVANKYFPDVTVTWEVDGTTQTTGIENSKTPQNSADCTYNLSSTLTLTSTQYNSHKE  
YTCKVTQGTTSVVQSFNRGDC-

**SAIC-30E-7-H2, RRM2, DIQHWESLKPEER**

>SAIC-30E-7-H2

ATG GAGACTGGGCTGCGCTGGCTTCTCCTGGTCGCTGTGCTCAAAGGTGTCCAGTGTGAGTCCGGTGG  
AGGAGTCCGGGGGTGCGCTGGTCACGCCTGGGACACCCCTGACACTCACCTGCACAGTCTCTGGATT  
CTCCCTCAATAGCTATGCAATGAGTTGGGTCCGCCAGGCTCCAGGGAAGGGACTGGAATGGATCGGAG  
TCATTGGTAATAATGGTATGACATGGTACGCGAGCTGGGCGAAAGGCCGATTACACCATCTCCAAAACCT  
CGACCACGGTGGATCTGAAAATGACCAGTCTGACAACCGAGGACACGGCCACCTATTTCTGTGCCAGT  
AGTGCTACTGCTAATACTACTACGCCATGGACCTCTGGGGCCCAGGGACCCTCGTCACCGTCTCTTC

A

GGGCAACCTAAGGCTCCATCAGTCTTCCCACTGGCCCCCTGCTGCGGGGACACACCCAGCTCCACGG  
TGACCCCGGGCTGCCTGGTCAAAGGGTACCTCCCGGAGCCAGTGACCGTGACCTGGAACCTCGGGCA  
CCCTACCAATGGGGTACGCACCTTCCCGTCCGTCCGGCAGTCCCTCAGGCCCTACTCGCTGAGCAG  
CGTGGTGAGCGTGACCTCAAGCAGCCAGCCCGTCACCTGCAACGTGGCCCACCCAGCCACCAACAC  
CAAAGTGGACAAGACCGTTGCGCCCTCGACATGCAGCAAGCCCACGTGCCACCCCTGAACTCCTG  
GGGGACCGTCTGTCTTTCATCTTCCCCCAAAACCAAGGACACCCCTCATGATCTCACGCACCCCGA  
GGTCACATGCGTGGTGGTGGACGTGAGCCAGGATGACCCCGAGGTGCAGTTCACATGGTACATAAACA  
ACGAGCAGGTGCGCACCCGCCCGCCGCTACGGGAGCAGCAGTTCAACAGCAGCAGTCCGCGTGG  
TCAGCACCCCTCCCATCGCGCACCCAGGACTGGCTGAGGGGCAAGGAGTTCAAGTGCAAAGTCCACAA  
CAAGGCACTCCCGGCCCCCATCGAGAAAACCATCTCAAAGCCAGAGGGCAGCCCTGGAGCCGAA  
GGTCTACACCATGGGCCCTCCCGGGAGGAGCTGAGCAGCAGGTCCGGTCAGCCTGACCTGCATGATC  
AACGGCTTCTACCCTTCCGACATCTCGGTGGAGTGGGAGAAGAACGGGAAGGCAGAGGACAACACTACA  
AGACCACGCCGGCCGTGCTGGACAGCGACGGCTCTACTTCTCTACAGCAAGCTCTCAGTGCCAC  
GAGTGAGTGGCAGCGGGGCGACGTCTTACCTGCTCCGTGATGCACGAGGCCTTGACAACCACTAC  
ACGCAGAAGTCCATCTCCCGCTCTCCGGGTAAATGA

**Protein sequence:**

>SAIC-30E-7-H2

METGLRWLLLVAVLKGVQCQSVEESGGRLVTPGTPLTLTCTVSGFSLNSYAMSWVRQAPGKGLEWIGVIG  
NNGMTWYASWAKGRFTISKSTTVDLKMTSLTTEDTATYFCASSATANTYYAMDLDWGPGLVTVSSGQPK  
APSVFPLAPCCGDTPSSTVTPGCLVKGYLPEPVTVTWNSGTLTNGVRTFPSVRQSSGLYSLSSVSVTSSS  
QPVTCNVAHPATNTKVDKTVAPSTCSKPTCPPPELLGGPSVFIFPPKPKDTLMISRTPEVTCVVVDVSDQDD  
PEVQFTWYINNEQVTRARPLREQQFNSTIRVVSTLPIAHQDWLRGKEFKCKVHNKALPAPIEKTISKARGQ  
PLEPKVYTMGPPREELSSRSVSLTCMINGFYPSDISVEWEKNGKAEDNYKTPAVLDSGYSFLYSKLSVP  
TSEWQRGDVFTCSVMHEALHNHYTQKSISRSPGK-

**SAIC-30E-7-L3, RRM2, DIQHWESLKPEER**

>SAIC-30E-7-L3

ATG GACACGAGGGCCCCCACTCAGCTGCTGGGGCTCCTGCTGCTCTGGCTCCAGGTGCCACATTTG  
CCATCGTGATGACCCAGACTCCATCTTCCACGTCTGCAGCTGTGGGAGGCACAGTCACCATCAATTGC  
CAGGCCAGTGAGAGTCTTTATGGTAACAACCGCTTAGCCTGGTTTCAACAGAAACCAGGGCAGCCTCC  
CAAGCTCCTGATCTATTCTGCATCCACTCTGGATTCTGGGGTCTCATCGCGGTTCAAAGGCAGTGGATC  
TGGGACACAGTTCACTCTCACCATCAGCGATGTGGTGTGTGGCGATGCTGCCACTTACTACTGTGCAG  
GATATAAACTACTAGTACTGATGGTACTTCTTTCGGCGGAGGGACCGAGGTGGTGGTCAA  
GGTGATCCAGTTGCACCTACTGTCCTCATCTTCCACCAGCTGCTGATCAGGTGGCAACTGGAACAGT

CACCATCGTGTGTGTGGCGAATAAATACTTTCCCGATGTCACCGTCACCTGGGAGGTGGATGGCACCA  
CCCAAACAACCTGGCATCGAGAACAGTAAACACCGCAGAATTCTGCAGATTGTACCTACAACCTCAGCA  
GCACTCTGACACTGACCAGCACACAGTACAACAGCCACAAAGAGTACACCTGCAAGGTGACCCAGGG  
CACGACCTCAGTCGTCCAGAGCTTCAATAGGGGTGACTGTAG

**Protein sequence:**

>SAIC-30E-7-L3

MDTRAPTQLLGLLLLWLPGATFAIVMTQTPSSTSAAVGGTVTINCQASESLYGNNRLAWFQQKPGQPPKLL  
IYSASTLD SGVSSRFKGS GSGTQFTLTISDVVCGDAATYYCAGYKTTSTDGTSFGGGTEVVVKGDPVAPT  
V LIFPPAADQVATGTVTIVCVANKYFPDVTVTWEVDGTTQTTGIENSKTPQNSADCTYNLSSTLTLTSTQYNS  
HKEYTCKVTQGTTSVVQSFNRGDC-

**SAIC-31A-10-H3, SNCG, TVEEAENIAVTSGVVR**

>SAIC-31A-10-H3

ATG GAGACTGGGCTGCGCTGGCTTCTCCTGGTCGCTGTGCTCAAAGGTGTCCAGTGTCAAGTGGCTGG  
AGGAGTCCGGGGGTGCGCTGGTCACGCCTGGGACACCCCTGACACTCACCTGCACCGTCTCTGGATT  
CTCCCTCAGTAGCGTCCGAGTGAATTGGGTCCGCCAGGCTCCAGGGAAGGGGCTGGAGTGGATCGG  
ATACGTTGATAATACTGGTAGGACAGTCTACGCGAGCTGGGCGAAAGGCCGATTACCATCTCCAGAAC  
CTCGACCACGGTGGATCTCAAATCACCAGTCCGACAACCGAGGACACGGCCACCTATTTCTGTGCCA  
AATACTTTAACTTGTGGGGCCAGGCACCCTGGTCACCGTCTCCTCA  
GGGCAACCTAAGGCTCCATCAGTCTTCCCACTGGCCCCCTGCTGCGGGGACACACCCAGCTCCACGG  
TGACCCTGGGCTGCCTGGTCAAAGGGTACCTCCCGGAGCCAGTGACCGTGACCTGGAACCTCGGGCA  
CCCTCACCAATGGGGTACGCACCTTCCCGTCCGTCCGGCAGTCCTCAGGCCTCTACTCGCTGAGCAG  
CGTGGTGAGCGTGACCTCAAGCAGCCAGCCCGTCACCTGCAACGTGGCCACCCAGCCACCAACAC  
CAAAGTGGACAAGACCGTTGCGCCCTCGACATGCAGCAAGCCCACGTGCCACCCCCCTGAACTCCTG  
GGGGGACCGTCTGTCTTCATCTTCCCCCAAACCAAGGACACCCTCATGATCTCACGCACCCCCGA  
GGTCACATGCGTGGTGGTGGACGTGAGCCAGGATGACCCCGAGGTGCAGTTCACATGGTACATAACA  
ACGAGCAGGTGCGCACCCGCCCGCCGCGCTACGGGAGCAGCAGTTCAACAGCAGATCCGCGTGG  
TCAGCACCCCTCCCCATCGCGCACCCAGGACTGGCTGAGGGGCAAGGAGTTCAAGTGCAAAGTCCACAA  
CAAGGCACTCCCGGCCCCCATCGAGAAAACCATCTCAAAGCCAGAGGGCAGCCCTGGAGCCGAA  
GGTCTACACCATGGGCCCTCCCGGGAGGAGCTGAGCAGCAGGTCCGGTCAGCCTGACCTGCATGATC  
AACGGCTTCTACCCTTCCGACATCTCGGTGGAGTGGGAGAAGAACGGGAAGGCAGAGGACAACACTACA  
AGACCACGCCGGCCGTGCTGGACAGCGACGGCTCCTACTTCTCTACAGCAAGCTCTCAGTGCCAC  
GAGTGAGTGGCAGCGGGGCGACGTCTTCACCTGCTCCGTGATGCACGAGGCCTTGACAACCACTAC  
ACGCAGAAGTCCATCTCCCGCTCTCCGGGTAAATGA

**Protein sequence:**

>SAIC-31A-10-H3

METGLRWLLLVAVLKGVQCQSLEESGGRLVTPGTPLTLTCTVSGFSLSSVGVNWRQAPGKGLEWIGYVD  
NTGRTVYASWAKGRFTISRTSTTVDLKITSPTTEDTATYFCAKYFNLWGPGLVTVSSGQPKAPSVFPLAPC  
CGDTPSSTVTLGCLVKGYLPEPVVTWNSGTLNNGVRTFPSVRQSSGLYSLSSVSVTSSSQPVTCNVAH  
PATNTKVDKTVAPSTCSKPTCPPPELLGGPSVFIFPPKPKDTLMISRTPEVTCVVVDVSDDEPEVQFTWYIN  
NEQVRTARPLREQQFNSTIRVVSTLPIAHQDWLRGKEFKCKVHNKALPAPIEKTISKARGQPLEPKVYTMG  
PPREELSSRSVSLTCMINGFYPSDISVEWEKNGKAEDNYKTTPAVLDSGYSFLYSKLSVPTSEWQRGDVF  
TCSVMHEALHNHYTQKSISRSPGK-

**SAIC-31A-10-L3, SNCG, TVEEAENIAVTSGVVR**

>SAIC-31A-10-L3

ATG GACACGAGGGCCCCACTCAGCTGCTGGGGCTCCTGCTGCTCTGGCTCCAGGTGCCACATTTG  
CGCAAGTGCTGACCCAGACTGCATCGTCCGTGTCTACAGCTGTGGGAGGCACAGTCACCATCAATTGT  
CAGTCCAGTCAGAGCGTTTATGGTAACAACCTGGTTAGCCTGGTTTCAGCAGAAACCAGGGCAGCCTCC  
CAAGCTCCTGATCTACGAAGCATCAAATTGGCATCTGGGGTCCCACCGCGGCTCAGCGGCAGTGGAT  
CTGGGACACAGTTCACCTCTACCATCAGCGGCGTGCAGTGTGACGATGCTGCCACTTACTACTGTCTA  
GGCGGTTATAGTGATAATATTTATATTTTCGGCGGAGGGACCGAGGTGGTGGTCAAG  
GGTGTATCCAGTTGCACCTACTGTCCTCATCTTCCCACCAGCTGCTGATCAGGTGGCAACTGGAACAGT  
CACCATCGTGTGTGTGGCGAATAAATACTTTCCCGATGTCACCGTCACCTGGGAGGTGGATGGCACCA

CCCAAACAACCTGGCATCGAGAACAGTAAAACACCGCAGAATTCTGCAGATTGTACCTACAACCTCAGCA  
GCACTCTGACACTGACCAGCACACAGTACAACAGCCACAAAGAGTACACCTGCAAGGTGACCCAGGG  
CACGACCTCAGTCGTCCAGAGCTTCAATAGGGGTGACTGTAG

**Protein sequence:**

>SAIC-31A-10-L3

MDTRAPTQLLGLLLLWLPGATFAQVLTQTASSVSTAVGGTVTINCQSSQSVYGNNWLAWFQQKPGQPPKL  
LIYEASKLASGVPPRLSGSGSGTQFTLTISGVQCDDAATYYCLGGYSDNIYIFGGGTEVVVKGDPVAPT  
LIFPPAADQVATGTVTIVCVANKYFPDVTVTWEVDGTTQTTGIENSKTPQNSADCTYNLSSTLTLTSTQYNSHK  
EYTCKVTQGTTSVVQSFNRGDC-



**SAIC-32C-205-H1**, FSCN1, YLAPSGPSGTLK

>SAIC-32C-205-H1

ATG GAGACTGGGCTGCGCTGGCTTCTCCTGGTCGCTGTGCTCAAAGGTGCCAGTGTGAGTCGGTGG  
AGGAGTCCAGGGGAGGCCTGATCAAGCCAACGGATACCCTGACTCACCTGCACAGTTTCTGGATTC  
TCCCTCAGTAGCGATGCAATAAGCTGGGTCCGCCAGGCTCCAGGGAACGGGCTGGAATGGATCGGAG  
CCGTTGGTGGTAGTGGTCGCACATACTACGCGAACTGGGCGAAAAGCCGATCCACCATCACCAGAAAC  
ACCAACCTGAACACGGTACTCTGAAAATGACCAGTCTGACAGCCGCGGACACGGCCACCTATTTCTG  
TGCGAGAGGAGGTTATGCTGCCGACATCTGGGGCCCAGGCACCCTGGTCACCGTCTCCTCA  
GGGCAACCTAAGGCTCCATCAGTCTTCCCACTGGCCCCCTGCTGCGGGGACACACCCAGCTCCACGG  
TGACCCTGGGCTGCCTGGTCAAAGGGTACCTCCCGGAGCCAGTGACCGTGACCTGGAACCTCGGGCA  
CCCTCACCAATGGGGTACGCACCTTCCCGTCCGTCCGGCAGTCCTCAGGCCTCTACTCGCTGAGCAG  
CGTGGTGAGCGTGACCTCAAGCAGCCAGCCCGTCACCTGCAACGTGGCCACCCAGCCACCAACAC  
CAAAGTGGACAAGACCGTTGCGCCCTCGACATGCAGCAAGCCCACGTGCCACCCCCCTGAACTCCTG  
GGGGACCGTCTGTCTTCATCTTCCCCC AAAACCCAAGGACACCCTCATGATCTCACGCACCCCCGA  
GGTCACATGCGTGGTGGTGGACGTGAGCCAGGATGACCCCGAGGTGCAGTTCACATGGTACATAAACA  
ACGAGCAGGTGCGCACCCGCCCGCCGCTACGGGAGCAGCAGTTCAACAGCAGATCCGCGTGG  
TCAGCACCCCTCCCATCGCGCACCCAGGACTGGCTGAGGGGCAAGGAGTTCAAGTGCAAAGTCCACAA  
CAAGGCACTCCCGGCCCCCATCGAGAAAACCATCTCAAAGCCAGAGGGCAGCCCTGGAGCCGAA  
GGTCTACACCATGGGCCCTCCCGGGAGGAGCTGAGCAGCAGGTGCGGTCAGCCTGACCTGCATGATC  
AACGGCTTCTACCCTTCCGACATCTCGGTGGAGTGGGAGAAGAACGGGAAGGCAGAGGACA ACTACA  
AGACCACGCCGGCCGTGCTGGACAGCGACGGCTCCTACTTCTCTACAGCAAGCTCTCAGTGCCAC  
GAGTGAGTGGCAGCGGGGCGACGTCTTACCTGCTCCGTGATGCACGAGGCCCTGCACAACCACTAC  
ACGCAGAAGTCCATCTCCCGCTCTCCGGGTAAATGA

**Protein sequence:**

>SAIC-32C-205-H1

METGLRWLLLVAVLKGAQCQSVEESRGLIKPTD LTLTCTVSGFSLSSDAISWVRQAPNGLEWIGAVGG  
SGRTYYANWAKSRSTITRNTNLNTVTLKMTSLTAADTATYFCARGGYAADIWGPGLVTVSSGQPKAPSVF  
PLAPCCGDTPSSTVTLGCLVKGYLPEPVTVTWSGTLNNGVRFPSVRQSSGLYLSVVSVTSSSQPVT  
CNVAHPATNTKVDKTVAPSTCSKPTCPPPELLGGPSVFIFPPKPKDTLMISRTPEVTCVVDVSDDEPEVQ  
FTWYINNEQVRTARPPLREQQFNSTIRVVSTLPIAHQDWLRGKEFKCKVHNKALPAPIEKTISKARGQPLEP  
KVYTMGPPREELSSRSVSLTCMINGFYPSDISVEWEKNGKAEDNYKTTPAVLDSGDSYFLYSKLSVPTSEW  
QRGDVFTCSVMHEALHNHYTQKSISRSPGK-

**SAIC-32C-205-L1**, FSCN1, YLAPSGPSGTLK

>SAIC-32C-205-L1

ATG GACACGAGGGCCCCACTCAGCTGCTGGGGCTCCTGCTGCTCTGGCTCCAGGTGCCACATTTG  
CCCAAGTGCTGACCCAGACTGCATCCCCGTGTCTGCGGCTGTGGGAGGCACAGTCACCATCAATTG  
CCAGTCCAGTCAGAGTGTTTATAATAAGAACTACTTATCCTGGTTTCAGAAGAGGCCAGGGCAACCTCC  
CAAGCGCCTGATCTGGTCTGCATCCACTCTGGCATCTGGGGTCTCATCGCGGTTCAAAGGCAGTGGAT  
CTGGGACACAGTTCACTCTACCATCAGCGACCTGGAGTGTGACGATGCTGCCACTTACTACTGTGCA  
GGCGATTATGGTGGTAGTGTCCTTTTCGGCGGAGGGACCGCGGTGGTGGTCAA  
GGTGATCCAGTTGCACCTACTGTCCTCATCTTCCCACAGCTGCTGATCAGGTGGCAACTGGAACAGT  
CACCATCGTGTGTGTGGCGAATAAATACTTTCCCGATGTCACCGTCACCTGGGAGGTGGATGGCACCA

CCCAAACAACCTGGCATCGAGAACAGTAAACACCCGCAGAATTCTGCAGATTGTACCTACAACCTCAGCA  
GCACTCTGACACTGACCAGCACACAGTACAACAGCCACAAAGAGTACACCTGCAAGGTGACCCAGGG  
CACGACCTCAGTCGTCCAGAGCTTCAATAGGGGTGACTGTAG

**Protein sequence:**

>SAIC-32C-205-L1

MDTRAPTQLLGLLLLWLPGATFAQVLTQTASPVSAAVGGTVTINCQSSQSVYNKNYLSWFQKRPGQPPKR  
LIWSASTLASGVSSRFKGS GSGTQFTLTISDLECDDAATYYCAGDYGGSVLFGGGTAVVVKGDPVAPT  
VLI  
FPPAADQVATGTVTIVCVANKYFPDVTVTWEVDGTTQTTGIENSKTPQNSADCTYNLSSTLTLTSTQYN  
SH  
KEYTCKVTQGTTSVVQSFNRGDC-

**SAIC-33B-129-H1, TAGLN, AAEDYGVIK**

>SAIC-33B-129-H1

ATG GAGACTGGGCTGCGCTGGCTTCTCCTGGTCGCTGTGCTCAAAGGTGTCCAGTGT CAGGAGCAGC  
TGAAGGAATCCGGGGGAGGCCTGATCAAGCCTGGAGGAACCCTGACACTCACCTGCACAGCCTCCGG  
ATTCACCATCAGTAGTATTGCAATAACCTGGGTCCGCCAGGCTCCAGGGAACGGGCTGGAATACATCG  
GATTCATTAGTAGTGGTGGTAGTATATTCTACGCGAGCTGGGCGGAAAGCCGATCCACCATCACCAGAA  
ACACCAACCTGAACACGGTGACTCTGACAATGACCAGTCTGACAGCCGCGGACACGGCCACCTATTTCT  
TGACGAGAGGTGTTCTGCTTATAAGTATGAGACCAGTGGGAACATATGGGGCCCAGGCACCCTGGT  
CACCGTCTCCTCA

GGGCAACCTAAGGCTCCATCAGTCTTCCCACTGGCCCCCTGCTGCGGGGACACACCCAGCTCCACGG  
TGACCCTGGGCTGCCTGGTCAAAGGGTACCTCCCGGAGCCAGTGACCGTGACCTGGAACCTCGGGCA  
CCCTACCAATGGGGTACGCACCTTCCCGTCCGTCCGGCAGTCCCTCAGGCTCTACTCGCTGAGCAG  
CGTGGTGAGCGTGACCTCAAGCAGCCAGCCCGTCACCTGCAACGTGGCCCACCCAGCCACCAACAC  
CAAAGTGGACAAGACCGTTGCGCCCTCGACATGCAGCAAGCCCACGTGCCACCCCTGAACTCCTG  
GGGGACCGTCTGTCTTTCATCTTCCCCCAAACCCAAAGGACACCCTCATGATCTCACGCACCCCGA  
GGTCACATGCGTGGTGGTGGACGTGAGCCAGGATGACCCCGAGGTGCAGTTCACATGGTACATAAACA  
ACGAGCAGGTGCGCACCCGCCCGCCGCTACGGGAGCAGCAGTTCAACAGCAGCAGTCCGCGTGG  
TCAGCACCCCTCCCATCGCGCACCCAGGACTGGCTGAGGGGCAAGGAGTTCAAGTGCAAAGTCCACAA  
CAAGGCACTCCCGGCCCCCATCGAGAAAACCATCTCAAAGCCAGAGGGCAGCCCTGGAGCCGAA  
GGTCTACACCATGGGCCCTCCCGGGAGGAGCTGAGCAGCAGGTCCGGTCAGCCTGACCTGCATGATC  
AACGGCTTCTACCCTTCCGACATCTCGGTGGAGTGGGAGAAGAACGGGAAGGCAGAGGACAACACTACA  
AGACCACGCCGGCCGTGCTGGACAGCGACGGCTCTACTTCTCTACAGCAAGCTCTCAGTGCCAC  
GAGTGAGTGGCAGCGGGGCGACGTCTTACCTGCTCCGTGATGCACGAGGCCTTGACAACCACTAC  
ACGCAGAAGTCCATCTCCCGCTCTCCGGGTAAATGA

**Protein sequence:**

>SAIC-33B-129-H1

METGLRWLLLVAVLKGVQCQEQLKESGGGLIKPGGTLTLTCTASGFTISSIAITWVRQAPNGLEYIGFISSG  
GSIFYASWAESRSTITRNTNLNTVLTMTSLTAADTATYFCTRGVPAKYETSGNIWGPGLTVVSSGQPKA  
PSVFPLAPCCGDTSPSTVTLGCLVKGYLPEPVTVTWNSGTLTNGVRTFPSVRQSSGLYSLSSVSVTSSSQ  
PVTCNVAHPATNTKVDKTVAPSTCSKPTCPPPELLGGPSVFIFFPKPKDTLMISRTPEVTCVVVDVSQDDPE  
VQFTWYINNEQVRTARPLREQQFNSTIRVVSTLPIAHQDWLRGKEFKCKVHNKALPAPIEKTISKARGQPL  
EPKVYTMGPPREELSSRSVSLTCMINGFYPSDISVEWEKNGKAEDNYKTTPAVLDSGYSFLYKLSVPTS  
EWQRGDVFTCSVMHEALHNHYTQKSISRSPGK-

**SAIC-33B-129-L3, TAGLN, AAEDYGVIK**

>SAIC-33B-129-L3

ATG GACACGAGGGCCCCCACTCAGCTGCTGGGGCTCCTGCTGCTCTGGCTCCAGGTGCCACATTTG  
CCCAAGTGCTGACCCAGACTCCAGCCTCCGTGTCTGCGGCTGTTGGAGGCACAGTCACCATCAATTG  
CCAGTCCAGTCAGAGTGTTTATAATGACAACTTCTTATCCTGGTATCAGCAGAAATTAGGGCAGCCTCCC  
AAGCTCCTGATCTATCTGGCATCCACTCTGGCATCTGGGGTCCCATCGCGTTCAAAGGCAGTGGATC  
TGGGACACGGTTCACCCCTACCATCAGCGACCTGGAGTGTGACGATGCTGCCACTTACTACTGTGCCG  
GCGGTTGGCGTGGGAGTATTTATGGTTTCGGCGGAGGGACCGAGGTGGTGGTCAAA  
GGTGATCCAGTTGCACCTACTGTCCTCATCTTCCACCAGCTGCTGATCAGGTGGCAACTGGAACAGT

CACCATCGTGTGTGTGGCGAATAAATACTTTCCCGATGTCACCGTCACCTGGGAGGTGGATGGCACCA  
CCCAAACAACCTGGCATCGAGAACAGTAAACACCGCAGAATTCTGCAGATTGTACCTACAACCTCAGCA  
GCACTCTGACACTGACCAGCACACAGTACAACAGCCACAAAGAGTACACCTGCAAGGTGACCCAGGG  
CACGACCTCAGTCGTCCAGAGCTTCAATAGGGGTGACTGT**TAG**

**Protein sequence:**

>SAIC-33B-129-L3

MDTRAPTQLLGLLLLWLPGATFAQVLTQTPASVSAAVGGTVTINCQSSQSVYNDNFLSWYQQKLGQPPKL  
LIYLASTLASGVPSRFKGS GSGTRFTLTISDLECDDAATYYCAGGWGRGSIYGFGGGTEVVVKGDPVAPTCLI  
FPPAADQVATGTVTIVCVANKYFPDVTVTWEVDGTTQTTGIENSKTPQNSADCTYNLSSTLTLTSTQYN  
SH  
KEYTCKVTQGTTSVVQSFNRGDC-



CACCATCGTGTGTGTGGCGAATAAATACTTTCCCGATGTCACCGTCACCTGGGAGGTGGATGGCACCA  
CCCAAACAACCTGGCATCGAGAACAGTAAAACACCGCAGAATTCTGCAGATTGTACCTACAACCTCAGCA  
GCACTCTGACACTGACCAGCACACAGTACAACAGCCACAAAGAGTACACCTGCAAGGTGACCCAGGG  
CACGACCTCAGTCGTCCAGAGCTTCAATAGGGGTGACTGT**TAG**

**Protein sequence:**

>SAIC-34B-124-L1

MDTRAPTQLLGLLLLWLPGATFAQVLTQTASSVSAAVGGTVTISCQSSQSVYGNFLSWYQQKPGQPPKL  
LIYMASTLASGVPSRFKGS GSGTQFTLTISDLECDDAATYFCAGGYSGSIYGFGGGTEVVVTGDPVAPTCLI  
FPPAADQVATGTVTIVCVANKYFPDVTVTWEVDGTTQTTGIENSKTPQNSADCTYNLSSTLTLTSTQYN  
SH  
KEYTCKVTQGTTSVVQSFNRGDC-



CACCATCGTGTGTGTGGCGAATAAATACTTTCCCGATGTCACCGTCACCTGGGAGGTGGATGGCACCA  
CCCAAACAACCTGGCATCGAGAACAGTAAACACCGCAGAATTCTGCAGATTGTACCTACAACCTCAGCA  
GCACTCTGACACTGACCAGCACACAGTACAACAGCCACAAAGAGTACACCTGCAAGGTGACCCAGGG  
CACGACCTCAGTCGTCCAGAGCTTCAATAGGGGTGACTGTAG

**Protein sequence:**

>SAIC-34D-11-L1

MDTRAPTQLLGLLLLWLPGARCA YDMTQTPASVEVAVGGTVTIKCQASQSISSYLNWYQQKPGQPPKLLIY  
KASTLASGVSSRFKGS GSGTEFTLTISDLECADAAATYYCQGGYDWRNV DNTFGGGTEVVVKGDPVAPT  
VLIFFPAADQVATGTVTIVCVANKYFPDVTVTWEVDGTTQTTGIENSKTPQNSADCTYNLSSTLTLTSTQYN  
SHKEYTCKVTQGTTSVVQSFNRGDC-



**SAIC-36A-9-H3, UBE2I, DHPFGFVAVPTK**

>SAIC-36A-9-H3

ATG GAGACTGGGCTGCGCTGGCTTCTCCTGGTCGCTGTGCTCAAAGGTGTCCAGTGTCAAGTCCGGTGG  
AGGAGTCCGGGGGTGCGCTGGTCACGCCTGGGACAGCCCTGACACTCACCTGCACAGTCTCTGGATT  
CTCCCTTAGTAGTTATGGAATGAGCTGGGTCCGCCAGGCTCCAGGGAAGGGGGCTGGAATGGGTCCGA  
TACATTCATCCTGATGGTAAGATATTCTATATATACTGGGCGAAAGGCCGATTACCATCTCCAAAACCTC  
GACCACGGTGGATCTGAAAATGACCAGTCTGACAAGCGAGGACACGGCCACGTATTTTTGTGCCAGAG  
GTGGTGGTGATACTAACATCTGGGGCCCAGGCACGCTGGTCACCGTCTCCTTA  
GGGCAACCTAAGGCTCCATCAGTCTTCCCCTGGCCCCCTGCTGCGGGGACACACCCAGCTCCACGG  
TGACCCTGGGCTGCCTGGTCAAAGGGTACCTCCCGGAGCCAGTGACCGTGACCTGGAACCTCGGGCA  
CCCTCACCAATGGGGTACGCACCTTCCCGTCCGTCCGGCAGTCCTCAGGCCTCTACTCGCTGAGCAG  
CGTGGTGAGCGTGACCTCAAGCAGCCAGCCCGTCACCTGCAACGTGGCCACCCAGCCACCAACAC  
CAAAGTGGACAAGACCGTTGCGCCCTCGACATGCAGCAAGCCCACGTGCCACCCCTGAACTCCTG  
GGGGACCGTCTGTCTTCATCTTCCCCCAAACCAAGGACACCCTCATGATCTCACGCACCCCGA  
GGTCACATGCGTGGTGGTGGACGTGAGCCAGGATGACCCCGAGGTGCAGTTCACATGGTACATAACA  
ACGAGCAGGTGCGCACCCGCCCGCCGCTACGGGAGCAGCAGTTCAACAGCAGATCCGCGTGG  
TCAGCACCCCTCCCATCGCGCACCCAGGACTGGCTGAGGGGCAAGGAGTTCAAGTGCAAAGTCCACAA  
CAAGGCACTCCCGGCCCCCATCGAGAAAACCATCTCCAAAGCCAGAGGGCAGCCCTGGAGCCGAA  
GGTCTACACCATGGGCCCTCCCGGGAGGAGCTGAGCAGCAGGTCCGGTCAGCCTGACCTGCATGATC  
AACGGCTTCTACCCTTCCGACATCTCGGTGGAGTGGGAGAAGAACGGGAAGGCAGAGGACAACACTACA  
AGACCACGCCGGCCGTGCTGGACAGCGACGGCTCCTACTTCTCTACAGCAAGCTCTCAGTGCCAC  
GAGTGAGTGGCAGCGGGGCGACGTCTTCACCTGCTCCGTGATGCACGAGGCCTTGACAACCACTAC  
ACGCAGAAGTCCATCTCCCGCTCTCCGGGTAAATGA

**Protein sequence:**

>SAIC-36A-9-H3

METGLRWLLLVAVLKGVQCQSVEESGGRLVTPGTALTLTCTVSGFSLSSYGMWVVRQAPGKGLEWVGYI  
HPDGKIFYIYWAKGRFTISKSTTTVDLKMSTLSEDTATYFCARGGGDTNIWGPGLTVTVSLGQPKAPSVFP  
LAPCCGDTSPSTVTLGCLVKGYLPEPVTVTWNSGTLTNGVRTFSPVRQSSGLYSLSSVSVTSSSQPVTC  
NVAHPATNTKVDKTVAPSTCSKPTCPPPELLGGPSVFIFPPKPKDTLMISRTPEVTCVVDVSDQDDPEVQFT  
WYINNEQVRTARPLREQQFNSTIRVVSTLPIAHQDWLRGKEFKCKVHNKALPAPIEKTISKARGQPLEPKV  
YTMGPPREELSSRSVSLTCMINGFYPSDISVEWEKNGKAEDNYKTPAVLDSGYSFLYSKLSVPTSEWQ  
RGDVFTCSVMHEALHNHYTQKSISRSPGK-

**SAIC-36A-9-L2, UBE2I, DHPFGFVAVPTK**

>SAIC-36A-9-L2

ATG GACACGAGGGCCCCACTCAGCTGCTGGGGCTCCTGCTGCTCTGGCTCCAGGTGCCACATTTG  
CCCAGGTTGTGATGACCCAGACTCCATCCTCCGTGTCTGCAGCTGTGGGAGGCACAGTCACCATCAAT  
TGCCAGTCCAGTCAGAGTGTTTATAATAACAACCGCTTATCCTGGTTTCAGCAGAAACCAGGGCAGCCT  
CCCAAGCTCCTGATGGACGATACATCGAGACTGGCATCTAGGGTCTCATCGCGGTTTCAGCGGCAGTGG  
ATCTGGGACACAGTTCACCTCTACCATCAGTGACGTGCAGTGTGACGATGCTGCCACTTACTACTGTCT  
AGGCAATTATGTTTGTGGTATTGCTGATTGTGCTGCTTTCGGCGGAGGGACCGAGGTGGTGGTCAAA  
GGTATCCAGTTGCACCTACTGTCCTCATCTTCCCACCAGCTGCTGATCAGGTGGCAACTGGAACAGT  
CACCATCGTGTGTGGCGAATAAATACTTCCCGATGTCACCGTCACCTGGGAGGTGGATGGCACCA

CCCAAACAACCTGGCATCGAGAACAGTAAACACCCGCAGAATTCTGCAGATTGTACCTACAACCTCAGCA  
GCACTCTGACACTGACCAGCACACAGTACAACAGCCACAAAGAGTACACCTGCAAGGTGACCCAGGG  
CACGACCTCAGTCGTCCAGAGCTTCAATAGGGGTGACTGTAG

**Protein sequence:**

>SAIC-36A-9-L2

MDTRAPTQLLGLLLLWLPGATFAQVVMQTTPSSVSAAVGGTVTINCQSSQSVYNNRLSWFQQKPGQPP  
KLLMDDTSRLASRVSSRFSGSGSGTQFTLTISDVQCDDAATYYCLGNYVCGIADCAAFGGGTEVVVKGDP  
VAPTVLIFPPAADQVATGTVTIVCVANKYFPDVTVTWEVDGTTQTTGIENSKTPQNSADCTYNLSSTLTLTST  
QYNSHKEYTCKVTQGTTSVVQSFNRGDC-

**SAIC-37C-23-H1, EZR, SGYLSSER**

>SAIC-37C-23-H1

ATG GAGACTGGGCTGCGCTGGCTTCTCCTGGTCGCTGTGCTCAAAGGTGTCCAGTGTGAGTCGCTGG  
AGGAGTCCGGGGGTGCGCTGGTCACGCCTGGGACACCCCTGACACTCACCTGCACAGTGTCTGGATT  
CTCCCTCAGTAGTTATGGAATGAACTGGGTCCGCCAGGCTCCAGGGAAGGGGCTGGAGTGGATCGGA  
ATCATTACCAGTCATGGTATTAAGACTACGCGAGCTGGGCGAAAGGCCGATTACCATCTCCAAGACC  
TCGACCACGGTTGATTTGACTATCAGCAGTCCGACAACCGAGGACACGGCCACCTATTTCTGTGCCAG  
AGGTTTGACTAATGGTAATAACATCTGGGGCCCCGGGCACCCTGGTCACCGTCTCCTTA  
GGGCAACCTAAGGCTCCATCAGTCTTCCCACTGGCCCCCTGCTGCGGGGACACACCCAGCTCCACGG  
TGACCCTGGGCTGCCTGGTCAAAGGGTACCTCCCGGAGCCAGTGACCGTGACCTGGAACCTCGGGCA  
CCCTCACCAATGGGGTACGCACCTTCCCGTCCGTCCGGCAGTCCTCAGGCCTCTACTCGCTGAGCAG  
CGTGGTGAGCGTGACCTCAAGCAGCCAGCCCGTCACCTGCAACGTGGCCACCCAGCCACCAACAC  
CAAAGTGGACAAGACCGTTGCGCCCTCGACATGCAGCAAGCCCACGTGCCACCCCTGAACTCCTG  
GGGGGACCGTCTGTCTTCATCTTCCCCCAAACCAAGGACACCCTCATGATCTCACGCACCCCGA  
GGTCACATGCGTGGTGGTGGACGTGAGCCAGGATGACCCCGAGGTGCAGTTCACATGGTACATAACA  
ACGAGCAGGTGCGCACCCGCCCGCCGCTACGGGAGCAGCAGTTCAACAGCAGATCCGCGTGG  
TCAGCACCCCTCCCATCGCGCACCCAGGACTGGCTGAGGGGCAAGGAGTTCAAGTGCAAAGTCCACAA  
CAAGGCACTCCCGGCCCCCATCGAGAAAACCATCTCCAAAGCCAGAGGGCAGCCCTGGAGCCGAA  
GGTCTACACCATGGGCCCTCCCGGGAGGAGCTGAGCAGCAGGTCCGGTCAGCCTGACCTGCATGATC  
AACGGCTTCTACCCTTCCGACATCTCGGTGGAGTGGGAGAAGAACGGGAAGGCAGAGGACAACACTACA  
AGACCACGCCGGCCGTGCTGGACAGCGACGGCTCCTACTTCTCTACAGCAAGCTCTCAGTGCCAC  
GAGTGAGTGGCAGCGGGGCGACGTCTTCACCTGCTCCGTGATGCACGAGGCCTTGACAACCACTAC  
ACGCAGAAGTCCATCTCCCGCTCTCCGGGTAAATGA

**Protein sequence:**

>SAIC-37C-23-H1

METGLRWLLLVAVLKGVQCQSLEESGGRLVTPGTPLTLTCTVSGFSLSSYGMNWVRQAPGKGLEWIGIITS  
HGKDYASWAKGRFTISKSTTVDLTISSPTTEDTATYFCARGLTNGNNIWGPGLVTVSLGQPKAPSVFPL  
APCCGDTPSSTVTLGCLVKGYLPEPVTVTWNSGLTNGVVRTFPSVRQSSGLYLSLSSVSVTSSSQPVTCN  
VAHPATNTKVDKTVAPSTCSKPTCPPPELLGGPSVFIFPPKPKDTLMISRTPEVTCVVVDVSDQDDPEVQFT  
WYINNEQVRTARPLREQQFNSTIRVVSTLPIAHQDWLRGKEFKCKVHNKALPAPIEKTISKARGQPLEPKV  
YTMGPPREELSSRSVSLTCMINGFYPSDISVEWEKNGKAEDNYKTPAVLDSGYSFLYSKLSVPTSEWQ  
RGDVFTCSVMHEALHNHYTQKSISRSPGK-

**SAIC-37C-23-L3, EZR, SGYLSSER**

>SAIC-37C-23-L3

ATG GACACGAGGGCCCCACTCAGCTGCTGGGGCTCCTGCTGCTCTGGCTCCAGGTGCCATATGTG  
ACCCTGTGATGACCCAGACTCCATCCTCCGTGTCTGCGGCTGTGGGAGGCACAGTCACCATCAACTGC  
CAGTCCAGTCACAATGTCTATAATAGGAACTGCTTATCCTGGTTTCAACAGAAACCAGGGCAGCCTCCC  
AAGCTCCTAATCTATAAGTCGGCCACTCTGGAATCTGGGGTCCCATCGCGGTTCAAAGGCAGTGGATCT  
GGGACACAGTTCCTACTCTCACCATCAGCGACCTGGAATGTGATGATGCTGCCACTTACTATTGTGCAGGC  
GATTATGATGATAAAGGTTTTGTTTTCGGCGGAGGGACCGAGGTGGTGGTCGAA  
GGTGATCCAGTTGCACCTACTGTCCTCATCTTCCCACCAGCTGCTGATCAGGTGGCAACTGGAACAGT  
CACCATCGTGTGTGTGGCGAATAAATACTTTCCCGATGTCACCGTCACCTGGGAGGTGGATGGCACCA

CCCAAACAACCTGGCATCGAGAACAGTAAACACCGCAGAATTCTGCAGATTGTACCTACAACCTCAGCA  
GCACTCTGACACTGACCAGCACACAGTACAACAGCCACAAAGAGTACACCTGCAAGGTGACCCAGGG  
CACGACCTCAGTCGTCCAGAGCTTCAATAGGGGTGACTGTAG

**Protein sequence:**

>SAIC-37C-23-L3

MDTRAPTQLLGLLLLWLPGAICDPVMTQTPSSVSAVGGTVTINCQSSHNVYNRNCLSWFQQKPGQPPKL  
LIYKSATLESGVPSRFKGS GSGTQFTLTISDLECDDAATYYCAGDYDDKGFVFGGGTEVVVEGDPVAPT  
VLI  
FPPAADQVATGTVTIVCVANKYFPDVTVTWEVDGTTQTTGIENSKTPQNSADCTYNLSSTLTLTSTQYN  
SH  
KEYTCKVTQGTTSVVQSFNRGDC-

**SAIC-40A-24-H1, PRDX4, QITLNDLPVGR**

>SAIC-40A-24-H1

ATG GAGACTGGGCTGCGCTGGCTTCTCCTGGTCGCTGTGCTCAAAGGTGTCCACTGTCAGTCGTTGG  
AGGAGTCCGGGGGAGGCCTGGTCCAGCCTGAGGGATCCCTGACACTCACCTGCACAGCCTCTGGATT  
CACCTCAGTA ACTACTGGCTGTGCTGGGTCCGCCAGGCTCCAGGGAAGGGGCTGGAGTGGATCGGA  
TGCATTTATAGTGGTGGTGTAGTAACACTGCCTACGCGAGCTGGGCGAAAGGCCGATTACCATCTCC  
AAGACCTCGTCGACCACGGTGACTCTGCAAATGCCAGGCTGACAGCCGCGGACACGGCCACCTATT  
TCTGTGCGGGAGGAGTTATTGCTGGATTCCAATTGGGCTTGTGGGGCCCAGGCACCCTGGTCACCGT  
CTCCTCA

GGGCAACCTAAGGCTCCATCAGTCTTCCCACTGGCCCCCTGCTGCGGGGACACACCCAGCTCCACGG  
TGACCCTGGGCTGCCTGGTCAAAGGGTACCTCCCGGAGCCAGTGACCGTGACCTGGA ACTCGGGCA  
CCCTACCAATGGGGTACGCACCTTCCCGTCCGTCCGGCAGTCCTCAGGCCTCTACTCGCTGAGCAG  
CGTGGT GAGCGTGACCTCAAGCAGCCAGCCCGTCACCTGCAACGTGGCCCACCCAGCCACCAACAC  
CAAAGTGGACAAGACCGTTGCGCCCTCGACATGCAGCAAGCCCACGTGCCACCCCTGAACTCCTG  
GGGGACCGTCTGTCTTTCATCTTCCCCCAAACCCAAAGGACACCCTCATGATCTCACGCACCCCGA  
GGTCACATGCGTGGTGGTGGACGTGAGCCAGGATGACCCCGAGGTGCAGTTCACATGGTACATAAACA  
ACGAGCAGGTGCGCACCCGCCCGCCGCTACGGGAGCAGCAGTTCAACAGCAGCAGTCCGCGTGG  
TCAGCACCTCCCATCGCGCACCCAGGACTGGCTGAGGGGCAAGGAGTTCAAGTGCAAAGTCCACAA  
CAAGGCACTCCCGGCCCCCATCGAGAAAACCATCTCAAAGCCAGAGGGCAGCCCTGGAGCCGAA  
GGTCTACACCATGGGCCCTCCCGGGAGGAGCTGAGCAGCAGGTCCGGTCAGCCTGACCTGCATGATC  
AACGGCTTCTACCCTTCCGACATCTCGGTGGAGTGGGAGAAGAACGGGAAGGCAGAGGACA ACTACA  
AGACCACGCCGGCCGTGCTGGACAGCGACGGCTCTACTTCTCTACAGCAAGCTCTCAGTGCCAC  
GAGTGAGTGGCAGCGGGGCGACGTCTTACCTGCTCCGTGATGCACGAGGCCTTGACAACCACTAC  
ACGCAGAAGTCCATCTCCCGCTCTCCGGGTAAATGA

**Protein sequence:**

>SAIC-40A-24-H1

METGLRWLLLVAVLKGVHCQSLEESGGGLVQPEGSLTLTCTASGFTLSNYWLCWVRQAPGKGLEWIGCIY  
SGGASNTAYASWAKGRFTISKTSSTTVTLQMPRLTAADTATYFCAGGVIAGFQLGLWGPGLVTVSSGQP  
KAPSVFPLAPCCGDPSSVTLGCLVKGYLPEPVTVTWNSGTLTNGVRTFPSVRQSSGLYSLSSVSVTSS  
SQPVTCNVAHPATNTKVDKTVAPSTCSKPTCPPPELLGGPSVFIFPPKPKDTLMISRTPEVTCVVVDVSD  
DPEVQFTWYINNEQVRTARPLREQQFNSTIRVVSTLPIAHQDWLRGKEFKCKVHNKALPAPIEKTISKARG  
QPLEPKVYTMGPPREELSSRSVSLTCMINGFYPSDISVEWEKNGKAEDNYKTTPAVLDSGYSFLYKLSV  
PTSEWQRGDVFTCSVMHEALHNHYTQKSISRSPGK-

**SAIC-40A-24-L3, PRDX4, QITLNDLPVGR**

>SAIC-40A-24-L3

ATG GACACGAGGGCCCCCACTCAGCTGCTGGGGCTCCTGCTGCTCTGGCTCCAGGTGCCACATTTG  
CCCAAGTGCTGACCCAGACTCCATCCCCTGTGTCTGCAGCTGTGGGAGGCACAGTCACCATCAATTGC  
CAGTCCAGTCAGAGTGTTTATAGGGACAACCGCTTATCCTGGTTTTAGCAGAAATCAGGACAGCCTCCC  
AAGCTCCTCATCTATGATGCATCCAACTGGCATCTGGGGTCCCACCGCGGTTTCAGCGGCAGTGGATC  
TGGGACACAGTTCACTCTACCATCAGCGGCGTGACGTGTGACGATGCTGCCACTTACTACTGTCAAG  
GCGAATTTAGGTGTACCAGTGTGATTGTACTACTTTCGGCGGAGGGACCGAGGTGGTGGTCAA  
GGTGATCCAGTTGCACCTACTGTCCTCATCTTCCACCAGCTGCTGATCAGGTGGCAACTGGAACAGT

CACCATCGTGTGTGTGGCGAATAAATACTTTCCCGATGTCACCGTCACCTGGGAGGTGGATGGCACCA  
CCCAAACAACCTGGCATCGAGAACAGTAAACACCGCAGAATTCTGCAGATTGTACCTACAACCTCAGCA  
GCACTCTGACACTGACCAGCACACAGTACAACAGCCACAAAGAGTACACCTGCAAGGTGACCCAGGG  
CACGACCTCAGTCGTCCAGAGCTTCAATAGGGGTGACTGTAG

**Protein sequence:**

>SAIC-40A-24-L3

MDTRAPTQLLGLLLLWLPGATFAQVLTQTPSPVSAAVGGTVTINCQSSQSVYRDNRLSWFQQKSGQPPKL  
LIYDASKLASGVPPRFSGSGSGTQFTLTISGVQCDDAATYYCQGEFRCTSDCTTFGGGTEVVVKGDPVA  
PTVLIFPPAADQVATGTVTIVCVANKYFPDVTVTWEVDGTTQTTGIENSKTPQNSADCTYNLSSTLTLTSTQ  
YNSHKEYTCKVTQGTTSVVQSFNRGDC-

**SAIC-40C-8-H1, PRDX4, LVQAFQYTDK**

>SAIC-40C-8-H1

ATG GAGACTGGGCTGCGCTGGCTTCTCCTGGTCGCTGTGCTCAAAGGTGTCCAGTGTGTCAGTCGCTGG  
AGGAGTCCGGGGGAGGCCTGGTCAAGCCTGGAGGAACCCTGACACTCACCTGCACAGCCTCTGGATT  
CTCCCTCAGTACTTATGGAATAACCTGGGTCCGCCAGGCTCCAGGGAAGGGGGCTGGAATGGATTGGAT  
TGATTGGTCGTGATGCTAGCACCTCCTACGCGAACTGGGCGAAAGGCCGATTGAGAATCTCCAAAACC  
TCCACCACGGTGGAGCTGAGAGTCACCAGTCCGACAATCGAGGACACGGCCACGTATTTCTGTGCCA  
GATTGGGGTCTGGTAATAGTTATTATATCTGGGGCCCAGGCACCGTGGTCACCGTCTCTTCA  
GGGCAACCTAAGGCTCCATCAGTCTTCCCCTGGCCCCCTGCTGCGGGGACACACCCAGCTCCACGG  
TGACCCTGGGCTGCCTGGTCAAAGGGTACCTCCCGGAGCCAGTGACCGTGACCTGGAACCTCGGGCA  
CCCTCACCAATGGGGTACGCACCTTCCCGTCCGTCCGGCAGTCCTCAGGCCTCTACTCGCTGAGCAG  
CGTGGTGAGCGTGACCTCAAGCAGCCAGCCCGTCACCTGCAACGTGGCCACCCAGCCACCAACAC  
CAAAGTGGACAAGACCGTTGCGCCCTCGACATGCAGCAAGCCCACGTGCCACCCCCCTGAACTCCTG  
GGGGGACCGTCTGTCTTCATCTTCCCCC AAAACCCAAGGACACCCTCATGATCTCACGCACCCCCGA  
GGTCACATGCGTGGTGGTGGACGTGAGCCAGGATGACCCCGAGGTGCAGTTCACATGGTACATAAACA  
ACGAGCAGGTGCGCACCCGCCCGCCGCTACGGGAGCAGCAGTTCAACAGCACGATCCGCGTGG  
TCAGCACCCCTCCCATCGCGCACCCAGGACTGGCTGAGGGGCAAGGAGTTCAAGTGCAAAGTCCACAA  
CAAGGCACTCCCGGCCCCCATCGAGAAAACCATCTCCAAAGCCAGAGGGCAGCCCTGGAGCCGAA  
GGTCTACACCATGGGCCCTCCCGGGAGGAGCTGAGCAGCAGGTGCGGTCAGCCTGACCTGCATGATC  
AACGGCTTCTACCCTTCCGACATCTCGGTGGAGTGGGAGAAGAACGGGAAGGCAGAGGACA ACTACA  
AGACCACGCCGGCCGTGCTGGACAGCGACGGCTCCTACTTCTCTACAGCAAGCTCTCAGTGCCAC  
GAGTGAGTGGCAGCGGGGCGACGTCTTACCTGCTCCGTGATGCACGAGGCCTTGACAACCACTAC  
ACGCAGAAGTCCATCTCCCGCTCTCCGGGTAAATGA

**Protein sequence:**

>SAIC-40C-8-H1

METGLRWLLLVAVLKGVQCQSLEESGGGLVKPGGTLTLTCTASGFSLSYGITWVRQAPGKGLEWIGLIGR  
DASTSYANWAKGRFRISKSTTVELRVTSPTIEDTATYFCARLGSNSYYIWGPVTVTVSSGQPKAPSVF  
PLAPCCGDTPSSTVTLGCLVKGYLPEPVTVTWNSGTLNNGVRTFPSVRQSSGLYLSVVSVTSSSQPVT  
CNVAHPATNTKVDKTVAPSTCSKPTCPPPELLGGPSVFIFPPKPKDTLMISRTPEVTCVVVDVSDDDPEVQ  
FTWYINNEQVRTARPLREQQFNSTIRVVSTLPIAHQDWLRGKEFKCKVHNKALPAPIEKTISKARGQPLEP  
KVYTMGPPREELSSRSVSLTCMINGFYPSDISVEWEKNGKAEDNYKTTPAVLDSGDSYFLYSKLSVPTSEW  
QRGDVFTCSVMHEALHNHYTQKSISRSPGK-

**SAIC-40C-8-L2, PRDX4, LVQAFQYTDK**

>SAIC-40C-8-L2

ATG GACACGAGGGCCCCACTCAGCTGCTGGGGCTCCTGCTGCTCTGGCTCCAGGTGCCACATTG  
CTCAAGTGCTGACCCAGACTGCATCGCCGTGTCTGCAGCTGTGGGAGGCACAGTACCATCAATTGT  
CAGTCCAGTCAGAGGGTTTATAATAACAACCAATTATCCTGGTATCAGCAGAAACCAGGGCAGCCTCCC  
AAGCGCCTGATCTATTCTGCATCCACTCTGTATCTGGGGTCCCATCGCGGTTCAAGGGCAGTGGATCT  
GGGACACAGTTCCTACTCTCACCATCAGCGACCTGGAGTGTGACGATGCTGCCACTTACTATTGTGCAGG  
CGGTTATGGTGGTGGACCTTTATCCTTTCGGCGGAGGGACCGAGGTGGTGGTCAGA  
GGTATCCAGTTGCACCTACTGTCCTCATCTTCCCACCAGCTGCTGATCAGGTGGCAACTGGAACAGT  
CACCATCGTGTGTGGCGAATAAATACTTTCCCGATGTCACCGTACCTGGGAGGTGGATGGCACCA

CCCAAACAACCTGGCATCGAGAACAGTAAACACCGCAGAATTCTGCAGATTGTACCTACAACCTCAGCA  
GCACTCTGACACTGACCAGCACACAGTACAACAGCCACAAAGAGTACACCTGCAAGGTGACCCAGGG  
CACGACCTCAGTCGTCCAGAGCTTCAATAGGGGTGACTGTAG

**Protein sequence:**

>SAIC-40C-8-L2

MDTRAPTQLLGLLLLWLPGATFAQVLTQTASPVSAAVGGTVTINCQSSQRVYNNNQLSWYQQKPGQPPK  
RLIYSASTLSSGVPSRFKGS SGTQFTLTISDLECDDAATYYCAGGYGGDLYPFGGGTEVVVRGDPVAPT  
LIFPPAADQVATGTVTIVCVANKYFPDVTVTWEVDGTTQTTGIENSKTPQNSADCTYNLSSTLTLTSTQYNS  
HKEYTCKVTQGTTSVVQSFNRGDC-



**SAIC-41A-1-H2, UBE2C, GISAFPESDNLFK**

>SAIC-41A-1-H2

ATG GAGACTGGGCTGCGCTGGCTTCTCCTGGTCGCTGTGCTCAAAGGTGTCCAGTGTCAAGTGGCTGG  
AGGAGTCCGGGGGTCGCTGGTAACGCCTGGAGGATCCCTGACACTCACCTGCACAGTCTCTGGATT  
CTCCCTCAGTAGAAATATTATGATCTGGGTCCGCCAGGCTCCAGGGGAGGGGCTGGAATGGGTCCGA  
GCCATGGATAATAATGAGAAACCATACTACGCGAGCTGGGCGAGAGGCCGATTACCATCTCCAAAGCC  
TCGTGACCACGGTGGATCTGAAGATGACCAGTCTGACAGCCGCGGACACGGCCACCTATTTCTGCG  
CAGGAGGCAGAGGTATCTTGTGGGGCCCAGGCACCCTGGTCACCGTCTCCTCA  
GGGCAACCTAAGGCTCCATCAGTCTTCCCCTGGCCCCCTGCTGCGGGGACACACCCAGCTCCACGG  
TGACCCTGGGCTGCCTGGTCAAAGGGTACCTCCCGGAGCCAGTGACCGTGACCTGGAACCTCGGGCA  
CCCTCACCAATGGGGTACGCACCTTCCCGTCCGTCCGGCAGTCCTCAGGCCTCTACTCGCTGAGCAG  
CGTGGTGAGCGTGACCTCAAGCAGCCAGCCCGTCACCTGCAACGTGGCCACCCAGCCACCAACAC  
CAAAGTGGACAAGACCGTTGCGCCCTCGACATGCAGCAAGCCCACGTGCCACCCCCCTGAACTCCTG  
GGGGACCGTCTGTCTTCATCTTCCCCCAAACCCAAAGGACACCCTCATGATCTCACGCACCCCCGA  
GGTCACATGCGTGGTGGTGGACGTGAGCCAGGATGACCCCGAGGTGCAGTTCACATGGTACATAACA  
ACGAGCAGGTGCGCACCCGCCCGCCGCGCTACGGGAGCAGCAGTTCAACAGCAGATCCGCGTGG  
TCAGCACCCCTCCCATCGCGCACCCAGGACTGGCTGAGGGGCAAGGAGTTCAAGTGCAAAGTCCACAA  
CAAGGCACTCCCGGCCCCCATCGAGAAAACCATCTCCAAAGCCAGAGGGCAGCCCTGGAGCCGAA  
GGTCTACACCATGGGCCCTCCCGGGAGGAGCTGAGCAGCAGGTCCGGTCAGCCTGACCTGCATGATC  
AACGGCTTCTACCCTTCCGACATCTCGGTGGAGTGGGAGAAGAACGGGAAGGCAGAGGACAACACTACA  
AGACCACGCCGGCCGTGCTGGACAGCGACGGCTCCTACTTCTCTACAGCAAGCTCTCAGTGCCAC  
GAGTGAGTGGCAGCGGGGCGACGTCTTACCTGCTCCGTGATGCACGAGGCCCTGCACAACCACTAC  
ACGCAGAAGTCCATCTCCCGCTCTCCGGGTAAATGA

**Protein sequence:**

>SAIC-41A-1-H2

METGLRWLLLVAVLKGVQCQSLEESGGRLVTPGGSLTLTCTVSGFSLSRNIMIWVRQAPGEGLEWVGAMD  
NNEKPYASWARGRFTISKASSTTVDLKMTSLTAADTATYFCAGGRGILWGPGLVTVSSGQPKAPSVFPL  
APCCGDTSPSTVTLGCLVKGYLPEPVTVTWNSGLTNGVVRTFPSVRQSSGLYLSVSVTSSSQPVTCN  
VAHPATNTKVDKTVAPSTCSKPTCPPPELLGGPSVFIFPPKPKDTLMISRTPEVTCVVVDVSQDDPEVQFT  
WYINNEQVRTARPLREQQFNSTIRVVSTLPIAHQDWLRGKEFKCKVHNKALPAPIEKTISKARGQPLEPKV  
YTMGPPREELSSRSVSLTCMINGFYPSDISVEWEKNGKAEDNYKTPAVLDSGYSFLYSKLSVPTSEWQ  
RGDVFTCSVMHEALHNHYTQKSISRSPGK-

**SAIC-41A-1-L4, UBE2C, GISAFPESDNLFK**

>SAIC-41A-1-L4

ATG GACACGAGGGCCCCACTCAGCTGCTGGGGCTCCTGCTGCTCTGGCTCCAGGTGCCATATGTG  
ACCCTGTGCTGACCCAGACTCCATCCTCCGTGTCTGCAACTGTGGGAGGCACAGTACCATCAATTGC  
CAGTCCAGTCCGAGTGTATAATAACTACTTATCCTGGTTTCAGCAGAAACCAGGGCAGCCTCCCAAG  
CGCCTCATCTATTCTGCATCCACTCTGCCATCTGGAGTCTCATCGCGGTTCAAAGGCAGTGGATCTGGG  
ACACAGTTCACTCTACCATCAGCGACGTGCGGTGTGACGATGCTGCCACTTATTACTGTCTAGGCAAT  
TATTATTGTGATAGTGTGATTGTTTTACTTTCGGCGGAGGGACCGAGGTGGTGGTTCGAA  
GGTATCCAGTTGCACCTACTGTCCTCATCTTCCCACCAGCTGCTGATCAGGTGGCAACTGGAACAGT  
CACCATCGTGTGTGGCGAATAAATACTTCCCAGTGTACCGTACCTGGGAGGTGGATGGCACCA

CCCAAACAACCTGGCATCGAGAACAGTAAACACCCGCAGAATTCTGCAGATTGTACCTACAACCTCAGCA  
GCACTCTGACACTGACCAGCACACAGTACAACAGCCACAAAGAGTACACCTGCAAGGTGACCCAGGG  
CACGACCTCAGTCGTCCAGAGCTTCAATAGGGGTGACTGTAG

**Protein sequence:**

>SAIC-41A-1-L4

MDTRAPTQLLGLLLLWLPGAICDPVLTQTPSSVSATVGGTVTINCQSSPSVYNNYLSWFQQKPGQPPKRLI  
YSASTLPSGVSSRFKGS GSGTQFTLTISDVRCDDAATYYCLGNYYCDSVDCFTFGGGTEVVVEGDPVAPT  
VLIFPPAADQVATGTVTIVCVANKYFPDVTVTWEVDGTTQTTGIENSKTPQNSADCTYNLSSTLTLTSTQYN  
SHKEYTCKVTQGTTSSVVQSFNRGDC-

**SAIC-41C-6-H4, UBE2C, LSLEFPSGYPNAPTvk**

>SAIC-41C-6-H4

ATG GAGACTGGGCTGCGCTGGCTTCTCCTGGTCGCTGTGCTCAAAGGTGTCCAGTGTCAAGTGGCTGG  
AGGAGTCCGGGGTTCGCTGGTCAAGGCTGGGACACCCCTGACACTCACCTGCACAGTCTCTGGAAT  
CGACCTCAGTAGCAATGCAGTGAAGTGGGTCGCGCCAGGCTCCAGGGAAGGGGCTGGAATGGATCGG  
GAGTACTGGCCTCAGTAATACTATATGGTACGCGAACTGGGCGAGAGGCCGATTACCATCTCCAAAAC  
CTCGTCGACCACGGTGGATCTGAAAATCACCACTCCGACAACCGAGGACACGGCCACGTATTTCTGTG  
CCATATTTTGGAGCTTGTGGGGCCAGGCACCCTGGTCACCGTCTCCTCA  
GGGCAACCTAAGGCTCCATCAGTCTTCCCACTGGCCCCCTGCTGCGGGGACACACCCAGCTCCACGG  
TGACCCTGGGCTGCCTGGTCAAAGGTTACCTCCCGGAGCCAGTGACCGTGACCTGGAAGTCCGGGCA  
CCCTCACCAATGGGGTACGCACCTTCCCGTCCGTCCGGCAGTCCTCAGGCCTCTACTCGCTGAGCAG  
CGTGGTGAGCGTGACCTCAAGCAGCCAGCCCGTCACCTGCAACGTGGCCACCCAGCCACCAACAC  
CAAAGTGGACAAGACCGTTGCGCCCTCGACATGCAGCAAGCCCACGTGCCACCCCTGAACTCCTG  
GGGGGACCGTCTGTCTTTCATCTTCCCCCAAACCAAGGACACCCTCATGATCTCACGCACCCCGA  
GGTCACATGCGTGGTGGTGGACGTGAGCCAGGATGACCCCGAGGTGCAGTTCACATGGTACATAACA  
ACGAGCAGGTGCGCACCCGCCCGCCGCTACGGGAGCAGCAGTTCAACAGCAGATCCGCGTGG  
TCAGCACCCCTCCCATCGCGCACCCAGGACTGGCTGAGGGGCAAGGAGTTCAAGTGCAAAGTCCACAA  
CAAGGCACTCCCGGCCCCCATCGAGAAAACCATCTCCAAAGCCAGAGGGCAGCCCTGGAGCCGAA  
GGTCTACACCATGGGCCCTCCCGGGAGGAGCTGAGCAGCAGGTCCGGTCAGCCTGACCTGCATGATC  
AACGGCTTCTACCCTTCCGACATCTCGGTGGAGTGGGAGAAGAACGGGAAGGCAGAGGACAACACTACA  
AGACCACGCCGGCCGTGCTGGACAGCGACGGCTCCTACTTCTCTACAGCAAGCTCTCAGTGCCAC  
GAGTGAGTGGCAGCGGGGCGACGTCTTACCTGCTCCGTGATGCACGAGGCCTTGACAACCACTAC  
ACGCAGAAGTCCATCTCCCGCTCTCCGGGTAAATGA

**Protein sequence:**

>SAIC-41C-6-H4

METGLRWLLLVAVLKGVQCQSLEESGGRLVTPGTLTLTCTVSGIDLSSNAVNWVRQAPGKGLEWIGSTG  
LSNTIYANWARGRFTISKTSSTTVDLKITSPTTEDTATYFCAIFWLSLWPGTLTVSSGQPKAPSVFPLAP  
CCGDPSSSTVTLGCLVKGYLPEPVTVTWNSGTLTNGVRTFPSVRQSSGLYSLSSVSVTSSSQPVTCNVA  
HPATNTKVDKTVAPSTCSKPTCPPPELLGGPSVFIFPPKPKDTLMISRTPEVTCVVDVSDQDDPEVQFTWYI  
NNEQVRTARPLREQQFNSTIRVVSTLPIAHQDWLRGKEFKCKVHNKALPAPIEKTISKARGQPLEPKVYTM  
GPPREELSSRSVSLTCMINGFYPSDISVEWEKNGKAEDNYKTTPAVLDSGYSFLYSKLSVPTSEWQRGD  
VFTCSVMHEALHNHYTQKSISRSPGK-

**SAIC-41C-6-L4, UBE2C, LSLEFPSGYPNAPTvk**

>SAIC-41C-6-L4

ATG GACACGAGGGCCCCCACTCAGCTGCTGGGGCTCCTGCTGCTCTGGCTCCAGGTGCCACATTTG  
CGCAAGTGCTGACCCAGACTGCATCGCCATGTCTGCAGCTGTGGGAGGCACAGTACCATCAATTGC  
CAGGCCAGTCAGAGTGTATAAGAACAACAACCTTAGCCTGGTTTCAGCAGAAACCAGGGCAGCCTCC  
CAAGCGGCTGATCTATGATGCATCCACTCTGGCATCTGGGGTCCCATCGCGGTTTCAGCGGCAGTGGAT  
CTGGGACACAGTTCCTCACCATCAGCGACCTGGAGTGTGACGATGCTGCCACTTATTATTGTACAG  
GCTATTTTAGTGTAATGTTTATGCTTTTGGCGGAGGGACCGAGGTGGTGGTCAAA  
GGTGATCCAGTTGCACCTACTGTCCTCATCTTCCCACCAGCTGCTGATCAGGTGGCAACTGGAACAGT  
CACCATCGTGTGTGGCGAATAAATACTTTCCCGATGTCACCGTCACCTGGGAGGTGGATGGCACCA  
CCCAAACAACCTGGCATCGAGAACAGTAAAACACCGCAGAATTCTGCAGATTGTACCTACAACCTCAGCA

GCACTCTGACACTGACCAGCACACAGTACAACAGCCACAAAGAGTACACCTGCAAGGTGACCCAGGG  
CACGACCTCAGTCGTCCAGAGCTTCAATAGGGGTGACTGTAG

**Protein sequence:**

>SAIC-41C-6-L4

MDTRAPTQLLGLLLLWLPGATFAQVLTQTASPMSSAAVGGTVTINCQASQSVYKNNNLAWFQQKPGQPPKR  
LIYDASTLASGVPSRFSGSGSGTQFTLTISDLECDAAATYYCTGYFSGNVYAFGGGTEVVVKGDPVAPTVLI  
FPPAADQVATGTVTIVCVANKYFPDVTVTWEVDGTTQTTGIENSKTPQNSADCTYNLSSTLTLTSTQYN  
SH  
KEYTCKVTQGTTSVVQSFNRGDC-

**SAIC-42B-10-H3, SERPINA6, AQLLQGLGFNLTER**

>SAIC-42B-10-H3

ATG GAGACTGGGCTGCGCTGGCTTCTCCTGGTCGCTGTGCTCAAAGGTGTCCAGTGTGTCAGTTCGGTGG  
AGGAGTCCGGGGGTGCGCTGGTCACGCCTGGGACACCCCTGACACTCACCTGTACAGGCTCTGGATT  
CTCCCTCAGTAGGTGGCTAATGAGCTGGGTCCGCCGGGCTCCAGGGAAGGGGCTGGAATATATCGGAT  
ACATTGATAGTTTTTATAACACATACTACGCGAGCTGGGCGAAAGGCCGATTACCATCTCCAGAACCT  
CGACCACGGTGGATCTGAAAATGACCAGTCTGACAACCTGAAGACACGGCCACCTATTTCTGTGCCAGA  
GGAAACACCTTCTTTAGGTTGTGGGGCCCAGGCACCCTGGTCACCGTCTCCTCG  
GGGCAACCTAAGGCTCCATCAGTCTTCCCCTGGCCCCCTGCTGCGGGGACACACCCAGCTCCACGG  
TGACCCTGGGCTGCCTGGTCAAAGGGTACCTCCCGGAGCCAGTGACCGTGACCTGGAACCTCGGGCA  
CCCTCACCAATGGGGTACGCACCTTCCCGTCCGTCCGGCAGTCCTCAGGCCTCTACTCGCTGAGCAG  
CGTGGTGAGCGTGACCTCAAGCAGCCAGCCCGTCACCTGCAACGTGGCCACCCAGCCACCAACAC  
CAAAGTGGACAAGACCGTTGCGCCCTCGACATGCAGCAAGCCCACGTGCCACCCCTGAACTCCTG  
GGGGGACCGTCTGTCTTCATCTTCCCCCAAACCAAGGACACCCTCATGATCTCACGCACCCCGA  
GGTCACATGCGTGGTGGTGGACGTGAGCCAGGATGACCCCGAGGTGCAGTTCACATGGTACATAACA  
ACGAGCAGGTGCGCACCCGCCCGCCGCTACGGGAGCAGCAGTTCAACAGCAGATCCGCGTGG  
TCAGCACCCCTCCCATCGCGCACCCAGGACTGGCTGAGGGGCAAGGAGTTCAAGTGCAAAGTCCACAA  
CAAGGCACTCCCGGCCCCCATCGAGAAAACCATCTCAAAGCCAGAGGGCAGCCCTGGAGCCGAA  
GGTCTACACCATGGGCCCTCCCGGGAGGAGCTGAGCAGCAGGTCCGGTCAGCCTGACCTGCATGATC  
AACGGCTTCTACCCTTCCGACATCTCGGTGGAGTGGGAGAAGAACGGGAAGGCAGAGGACAACACTACA  
AGACCACGCCGGCCGTGCTGGACAGCGACGGCTCCTACTTCTCTACAGCAAGCTCTCAGTGCCAC  
GAGTGAGTGGCAGCGGGGCGACGTCTTCACCTGCTCCGTGATGCACGAGGCCCTGCACAACCACTAC  
ACGCAGAAGTCCATCTCCCGCTCTCCGGGTAAATGA

**Protein sequence:**

>SAIC-42B-10-H3

METGLRWLLLVAVLKGVQCQSVEESGGRLVTPGTLTLTCTGSGFSLSRWLMSWVRRAPGKGLYIGYID  
SFHNTYYASWAKGRFTISRTSTTVDLKMTSLTTEDTATYFCARGNTFFRLWGPGLTVTVSSGQPKAPSVFP  
LAPCCGDTSPSTVTLGCLVKGYLPEPVTVTWNSGTLTNGVRTFSPVRQSSGLYSLSSVSVTSSSQPVTC  
NVAHPATNTKVDKTVAPSTCSKPTCPPPELLGGPSVFIFFPKPKDTLMISRTPEVTCVVDVSDQDDPEVQFT  
WYINNEQVRTARPLREQQFNSTIRVVSTLPIAHQDWLRGKEFKCKVHNKALPAPIEKTISKARGQPLEPKV  
YTMGPPREELSSRSVSLTCMINGFYPSDISVEWEKNGKAEDNYKTPAVLSDSGSYFLYSKLSVPTSEWQ  
RGDVFTCSVMHEALHNHYTQKSISRSPGK-

**SAIC-42B-10-L2, SERPINA6, AQLLQGLGFNLTER**

>SAIC-42B-10-L2

ATG GACACGAGGGCCCCACTCAGCTGCTGGGGCTCCTGCTGCTCTGGCTCCAGGTGCCAGATGTG  
TATTCGAATTGACCCAGACTGCATCCCCGTGTCTGCAGCTGTGGGAGGCACAGTCACCATCAAGTGC  
CAGACCAGTCAGAGCATTGGTAGTAATTTAGCCTGGTATCAGCAGAAACCAGGGCAGCCTCCCAAGCT  
CCTGATCTATGCTGCATCCAATCTGGCATCTGGGGTCCCATCGCGGTTCAAAGGCAGTGGATCTGGGA  
CACAGTTCACCTCTACCATCAGCGACCTGGAGTGTGCCGATGCTGCCACTTACGACTGTCAAATCTATG  
GTAGTGGTGCTAGTGGTAGTCCTGTTTATCCTTTTCGGCGGAGGGACCGAGGTGGTGGTCAAA  
GGTGTCCAGTTGCACCTACTGTCCTCATCTTCCCACCAGCTGCTGATCAGGTGGCAACTGGAACAGT  
CACCATCGTGTGTGGCGAATAAATACTTTCCCGATGTCACCGTCACCTGGGAGGTGGATGGCACCA

CCCAAACAACCTGGCATCGAGAACAGTAAACACCGCAGAATTCTGCAGATTGTACCTACAACCTCAGCA  
GCACTCTGACACTGACCAGCACACAGTACAACAGCCACAAAGAGTACACCTGCAAGGTGACCCAGGG  
CACGACCTCAGTCGTCCAGAGCTTCAATAGGGGTGACTGTAG

**Protein sequence:**

>SAIC-42B-10-L2

MDTRAPTQLLGLLLLWLPGARCVFELTQTASPVSAVGGTVTIKCQTSQSIGSNLAWYQQKPGQPPKLLIY  
AASNLAGVPSRFKGSSTQFTLTISDLECADAAATYDCQIYSGASGSPVYPPFGGGTEVVVKGDPVAPT  
VLIFPPAADQVATGTVTIVCVANKYFPDVTVTWEVDGTTQTTGIENSKTPQNSADCTYNLSSTLTLTSTQYN  
SHKEYTCKVTQGTTSVVQSFNRGDC-

**SAIC-43B-8-H1, CLU, ASSIIDELFQDR**

>SAIC-43B-8-H1

ATG GAGACTGGGCTGCGCTGGCTTCTCCTGGTCGCTGTGCTCAAAGGTGTCCAGTGTGAGTCCGGTGG  
AGGAGTCCGGGGGTGCGCTGGTCACGCCTGGGACACCCCTGACACTCACCTGCACAGTCTCTGGATT  
CTCCCTCAGTAGCTATGCATTGAACTGGGTCCGCCAGGCTCCAGGGAAGGGGCTGGAATGGATCGGA  
ATCATTAGTAGTAGTGGTAGCTCATACTACGCTAGCTGGGCGAAAGGCCGATTACCATCTCCAGAACC  
TCGACCACGGTGGATCTGAAAATCACCAGTCCGACAACCGAGGACACGGCCACCTATTTCTGTGCCAG  
AGACGTTTACGATATTGTTGGTTATGCTTATGCTACCGGATTTAACTTGTGGGGCCCAGGCACCCTGGTC  
ACCGTCTCCTCA

GGGCAACCTAAGGCTCCATCAGTCTTCCCACTGGCCCCCTGCTGCGGGGACACACCCAGCTCCACGG  
TGACCCTGGGCTGCCTGGTCAAAGGGTACCTCCCGGAGCCAGTGACCGTGACCTGGAACCTCGGGCA  
CCCTACCAATGGGGTACGCACCTTCCCGTCCGTCCGGCAGTCCCTCAGGCCCTACTCGCTGAGCAG  
CGTGGTGAAGCTGACCTCAAGCAGCCAGCCCGTCACTGCAACGTGGCCCACCCAGCCACCAACAC  
CAAAGTGGACAAGACCGTTGCGCCCTCGACATGCAGCAAGCCCACGTGCCACCCCTGAACTCCTG  
GGGGACCGTCTGTCTTTCATCTTCCCCCAAACCAAGGACACCCCTCATGATCTCACGCACCCCGA  
GGTCACATGCGTGGTGGTGGACGTGAGCCAGGATGACCCCGAGGTGCAGTTCACATGGTACATAAACA  
ACGAGCAGGTGCGCACCGCCCGGCCGCGCTACGGGAGCAGCAGTTCAACAGCAGCAGTCCGCGTGG  
TCAGCACCCCTCCCATCGCGCACCAAGGACTGGCTGAGGGGCAAGGAGTTCAAGTGCAAAGTCCACAA  
CAAGGCACTCCCGGCCCCCATCGAGAAAACCATCTCAAAGCCAGAGGGCAGCCCTGGAGCCGAA  
GGTCTACACCATGGGCCCTCCCGGGAGGAGCTGAGCAGCAGGTCCGGTCAGCCTGACCTGCATGATC  
AACGGCTTCTACCCTTCCGACATCTCGGTGGAGTGGGAGAAGAACGGGAAGGCAGAGGACAACACTACA  
AGACCACGCCGGCCGTGCTGGACAGCGACGGCTCTACTTCTCTACAGCAAGCTCTCAGTGCCAC  
GAGTGAGTGGCAGCGGGGCGACGTCTTACCTGCTCCGTGATGCACGAGGCCTTGACAACCACTAC  
ACGCAGAAGTCCATCTCCCGCTCTCCGGGTAAATGA

**Protein sequence:**

>SAIC-43B-8-H1

METGLRWLLLVAVLKGVQCQSVEESGGRLVTPGTPLTLTCTVSGFSLSSYALNWVRQAPGKGLEWIGIIS  
SGSSYYASWAKGRFTISRTSTTVDLKITSPTTEDTATYFCARDVYDIVGYAYATGFNLWGPGLVTVSSGQ  
PKAPSVFPLAPCCGDTSPSTVTLGCLVKGYLPEPVTVTWNSGTLTNGVRTFPSVRQSSGLYSLSSVSVTS  
SSQPVTCNVAHPATNTKVDKTVAPSTCSKPTCPPPELLGGPSVFIFPPKPKDTLMISRTPEVTCVVVDVSD  
DPEVQFTWYINNEQVRTARPLREQQFNSTIRVVSTLPIAHQDWLRGKEFKCKVHNKALPAPIEKTISKARG  
QPLEPKVYTMGPPREELSSRSVSLTCMINGFYPSDISVEWEKNGKAEDNYKTTPAVLDSGYSFLYKLSV  
PTSEWQRGDVFTCSVMHEALHNHYTQKSISRSPGK-

**SAIC-43B-8-L1, CLU, ASSIIDELFQDR**

>SAIC-43B-8-L1

ATG GACACGAGGGCCCCCACTCAGCTGCTGGGGCTCCTGCTGCTCTGGCTCCAGGTGCCACATTTG  
CCGCCGTGCTGACCCAGACTCCATCTCCCGTGTCTGCAGTTGTGGGAGGCACAGTCAGCATCAGTTG  
CCAGTCCAGTAAGAGTGTATAATAACAACCTGGTTATCCTGGTTTCAGCAGAAACCAGGGCAGCCTCC  
CAAGCTCCTGATCTATGGTGCATCCACTCTGGCATCTGGGGTCCCATCGCGGTTCAAAGGCAGTGGAT  
CTGGGACACAGTTCCTCCTCACCATCAGCGACGTGCAGTGTGACGATGCTGCCACTTACTACTGTGCA  
GGCGTTATAGTAGTAGTAGTGATAAAGGATATGCTTTCGGCGGAGGGACCGAGGTGGTGGTCAA  
GGTGTCCAGTTGCACCTACTGTCCTCATCTTCCACCAGCTGCTGATCAGGTGGCAACTGGAACAGT

CACCATCGTGTGTGTGGCGAATAAATACTTTCCCGATGTCACCGTCACCTGGGAGGTGGATGGCACCA  
CCCAAACAACCTGGCATCGAGAACAGTAAACACCGCAGAATTCTGCAGATTGTACCTACAACCTCAGCA  
GCACTCTGACACTGACCAGCACACAGTACAACAGCCACAAAGAGTACACCTGCAAGGTGACCCAGGG  
CACGACCTCAGTCGTCCAGAGCTTCAATAGGGGTGACTGTAG

**Protein sequence:**

>SAIC-43B-8-L1

MDTRAPTQLLGLLLLWLPGATFAAVLTQTPSPVSAVVGTVSISCQSSKSVYNNWLSWFQQKPGQPPKL  
LIYGASTLASGVPSRFKGS GSGTQFTLTISDVQCDDAATYYCAGGYSSSSDKGYAFGGGTEVVVKGDPVA  
PTVLIFPPAADQVATGTVTIVCVANKYFPDVTVTWEVDGTTQTTGIENSKTPQNSADCTYNLSSTLTLTSTQ  
YNSHKEYTCKVTQGTTSVVQSFNRGDC-
